# Supplementary material for: De novo Genome Sequence of Roseibium alexandrii MAR44 Strain, a Marine Bacterium with Capacity to Synthesize PHA Bioplastics and a Photosynthesis Gene Cluster
Source: Research Square preprint supplement (doi:10.21203/rs.3.rs-5965645/v1), 2025-02-26
Supplement: Supplementary file 1 [file a86838034500ab41fa66b987.xlsx]

## Sheet: MAR44G.1.AnnoSummary_fromNGe
Gene_id	Locus	{nr}	{SwissProt}	{KEGG}	{COG}	{TCDB}	{GO}	{PHI}	{VFDB}	{ARDB}	{CARD}	{Secretory_Protein}	{T3SS}	{CAZy}	{Pfam}
Annotation_num		4743	1747	2630	3790	442	3369	418	209	1	139	270	169	149	3369
MAR44G.1_GM000001	{Scaffold1:2124:2348:+}	{NA}	{NA}	{NA}	{NA}	{NA}	{NA}	{NA}	{NA}	{NA}	{NA}	{NA}	{false}	{NA}	{NA}
MAR44G.1_GM000002	{Scaffold1:5924:6157:-}	{WP_055673640.1; hypothetical protein [Roseibium alexandrii]}	{NA}	{NA}	{NA}	{NA}	{GO:0003824; NA}	{NA}	{NA}	{NA}	{NA}	{NA}	{false}	{NA}	{PF01564:Spermine/spermidine synthase}
MAR44G.1_GM000003	{Scaffold1:6213:8048:-}	{WP_008192526.1; V-type ATP synthase subunit A [Roseibium alexandrii]}	{Q73M28; V-type ATP synthase alpha chain }	{labp:FJ695_02770; K02117 ATPVA, ntpA, atpA V/A-type H+/Na+-transporting ATPase subunit A [EC:7.1.2.2 7.2.2.1] 7.1.2.2,7.2.2.1 Metabolism; Energy metabolism; Oxidative phosphorylation [PATH:ko00190]}	{WP.077291239.1; COG1155 Archaeal/vacuolar-type H+-ATPase catalytic subunit A/Vma1 C Energy production and conversion ;}	{gnl|TC-DB|O83441; 3.A.2.3.3 V-type ATP synthase alpha chain 1 OS=Treponema pallidum (strain Nichols) GN=atpA1 PE=3 SV=1}	{GO:0046034; ATP metabolic process; biological_process GO:0015992; proton transport; biological_process GO:0005524; ATP binding; molecular_function}	{NA}	{NA}	{NA}	{NA}	{NA}	{false}	{NA}	{PF00006:ATP synthase alpha/beta family, nucleotide-binding domain PF02874:ATP synthase alpha/beta family, beta-barrel domain}
MAR44G.1_GM000004	{Scaffold1:8045:8794:-}	{WP_055673642.1; DUF2764 family protein [Roseibium alexandrii]}	{NA}	{NA}	{NA}	{NA}	{NA}	{NA}	{NA}	{NA}	{NA}	{NA}	{false}	{NA}	{NA}
MAR44G.1_GM000005	{Scaffold1:8799:9500:-}	{WP_055673643.1; hypothetical protein [Roseibium alexandrii]}	{NA}	{labp:FJ695_02780; K02121 ATPVE, ntpE, atpE V/A-type H+/Na+-transporting ATPase subunit E -- Metabolism; Energy metabolism; Oxidative phosphorylation [PATH:ko00190]}	{NA}	{NA}	{GO:0006605; protein targeting; biological_process GO:0005742; mitochondrial outer membrane translocase complex; cellular_component GO:0006886; intracellular protein transport; biological_process GO:0016853; isomerase activity; molecular_function}	{NA}	{NA}	{NA}	{NA}	{NA}	{false}	{NA}	{PF02064:MAS20 protein import receptor PF00639:PPIC-type PPIASE domain}
MAR44G.1_GM000006	{Scaffold1:9510:9959:-}	{WP_008195907.1; ATP synthase subunit C [Roseibium alexandrii]}	{NA}	{labp:FJ695_02785; K02124 ATPVK, ntpK, atpK V/A-type H+/Na+-transporting ATPase subunit K -- Metabolism; Energy metabolism; Oxidative phosphorylation [PATH:ko00190]}	{WP.006939055.1; COG0636 FoF1-type ATP synthase, membrane subunit c/Archaeal/vacuolar-type H+-ATPase, subunit K C Energy production and conversion ;}	{NA}	{GO:0015078; hydrogen ion transmembrane transporter activity; molecular_function GO:0015991; ATP hydrolysis coupled proton transport; biological_process GO:0033177; proton-transporting two-sector ATPase complex, proton-transporting domain; cellular_component}	{NA}	{NA}	{NA}	{NA}	{NA}	{false}	{NA}	{PF00137:ATP synthase subunit C}
MAR44G.1_GM000007	{Scaffold1:9956:11749:-}	{WP_040451228.1; ATP synthase subunit I [Roseibium alexandrii]}	{NA}	{labp:FJ695_02790; K02123 ATPVI, ntpI, atpI V/A-type H+/Na+-transporting ATPase subunit I -- Metabolism; Energy metabolism; Oxidative phosphorylation [PATH:ko00190]}	{WP.077291241.1; COG1269 Archaeal/vacuolar-type H+-ATPase subunit I/STV1 C Energy production and conversion ;}	{NA}	{GO:0000271; polysaccharide biosynthetic process; biological_process GO:0016020; membrane; cellular_component GO:0033179; proton-transporting V-type ATPase, V0 domain; cellular_component GO:0015078; hydrogen ion transmembrane transporter activity; molecular_function GO:0015991; ATP hydrolysis coupled proton transport; biological_process}	{NA}	{NA}	{NA}	{NA}	{NA}	{false}	{NA}	{PF01496:V-type ATPase 116kDa subunit family PF01943:Polysaccharide biosynthesis protein}
MAR44G.1_GM000008	{Scaffold1:11746:12369:-}	{WP_008194812.1; V-type ATP synthase subunit D [Roseibium alexandrii]}	{NA}	{labp:FJ695_02795; K02120 ATPVD, ntpD, atpD V/A-type H+/Na+-transporting ATPase subunit D -- Metabolism; Energy metabolism; Oxidative phosphorylation [PATH:ko00190]}	{WP.022999273.1; COG1394 Archaeal/vacuolar-type H+-ATPase subunit D/Vma8 C Energy production and conversion ;}	{NA}	{GO:0042626; ATPase activity, coupled to transmembrane movement of substances; molecular_function}	{NA}	{NA}	{NA}	{NA}	{NA}	{false}	{NA}	{PF01813:ATP synthase subunit D }
MAR44G.1_GM000009	{Scaffold1:12369:13751:-}	{WP_008196465.1; V-type ATP synthase subunit B [Roseibium alexandrii]}	{B2S1S7; V-type ATP synthase beta chain }	{labp:FJ695_02800; K02118 ATPVB, ntpB, atpB V/A-type H+/Na+-transporting ATPase subunit B -- Metabolism; Energy metabolism; Oxidative phosphorylation [PATH:ko00190]}	{WP.077291242.1; COG1156 Archaeal/vacuolar-type H+-ATPase subunit B/Vma2 C Energy production and conversion ;}	{gnl|TC-DB|O83442; 3.A.2.3.3 V-type ATP synthase beta chain 1 OS=Treponema pallidum (strain Nichols) GN=atpB1 PE=3 SV=1}	{GO:0005524; ATP binding; molecular_function GO:0015992; proton transport; biological_process GO:0046034; ATP metabolic process; biological_process}	{NA}	{NA}	{NA}	{NA}	{NA}	{false}	{NA}	{PF02874:ATP synthase alpha/beta family, beta-barrel domain PF00006:ATP synthase alpha/beta family, nucleotide-binding domain}
MAR44G.1_GM000010	{Scaffold1:13970:14473:-}	{WP_008192626.1; MaoC family dehydratase [Roseibium alexandrii]}	{NA}	{NA}	{WP.014749257.1; COG2030 Acyl-CoA dehydratase PaaZ I Lipid transport and metabolism ;}	{NA}	{GO:0008152; NA GO:0016491; oxidoreductase activity; molecular_function}	{NA}	{NA}	{NA}	{NA}	{NA}	{false}	{NA}	{PF01575:MaoC like domain}
MAR44G.1_GM000011	{Scaffold1:14529:15788:-}	{WP_055673645.1; MFS transporter [Roseibium alexandrii]}	{NA}	{NA}	{NA}	{NA}	{GO:0055085; transmembrane transport; biological_process GO:0022857; transmembrane transporter activity; molecular_function GO:0016021; integral to membrane; cellular_component}	{NA}	{NA}	{NA}	{NA}	{NA}	{false}	{NA}	{PF07690:Major Facilitator Superfamily PF00083:Sugar (and other) transporter}
MAR44G.1_GM000012	{Scaffold1:15817:17226:-}	{WP_008194283.1; TRAP transporter large permease [Roseibium alexandrii]}	{NA}	{NA}	{WP.077290772.1; COG1593 TRAP-type C4-dicarboxylate transport system, large permease component G Carbohydrate transport and metabolism ;}	{NA}	{NA}	{NA}	{NA}	{NA}	{NA}	{NA}	{false}	{NA}	{NA}
MAR44G.1_GM000013	{Scaffold1:17223:17783:-}	{WP_208981491.1; TRAP transporter small permease [Roseibium alexandrii]}	{NA}	{NA}	{WP.117411376.1; COG4665 TRAP-type mannitol/chloroaromatic compound transport system, small permease component Q Secondary metabolites biosynthesis, transport and catabolism ;}	{NA}	{NA}	{NA}	{NA}	{NA}	{NA}	{NA}	{false}	{NA}	{NA}
MAR44G.1_GM000014	{Scaffold1:17758:17973:-}	{NA}	{NA}	{NA}	{NA}	{NA}	{NA}	{NA}	{NA}	{NA}	{NA}	{NA}	{false}	{NA}	{NA}
MAR44G.1_GM000015	{Scaffold1:17954:19096:-}	{WP_055673646.1; TRAP transporter substrate-binding protein DctP [Roseibium alexandrii]}	{NA}	{NA}	{WP.108881775.1; COG1638 TRAP-type C4-dicarboxylate transport system, periplasmic component G Carbohydrate transport and metabolism ;}	{NA}	{GO:0030288; outer membrane-bounded periplasmic space; cellular_component GO:0006810; transport; biological_process}	{NA}	{NA}	{NA}	{NA}	{NA}	{false}	{NA}	{PF03480:Bacterial extracellular solute-binding protein, family 7}
MAR44G.1_GM000016	{Scaffold1:19422:20192:-}	{WP_008196330.1; IclR family transcriptional regulator [Roseibium alexandrii]}	{NA}	{labp:FJ695_02835; K13641 iclR IclR family transcriptional regulator, acetate operon repressor -- --}	{WP.011160092.1; COG1414 DNA-binding transcriptional regulator, IclR family K Transcription ;}	{NA}	{GO:0003677; DNA binding; molecular_function GO:0004252; serine-type endopeptidase activity; molecular_function GO:0006508; proteolysis; biological_process GO:0006355; regulation of transcription, DNA-dependent; biological_process}	{NA}	{NA}	{NA}	{NA}	{NA}	{false}	{NA}	{PF09339:IclR helix-turn-helix domain PF01726:LexA DNA binding domain}
MAR44G.1_GM000017	{Scaffold1:20427:21611:+}	{WP_055673648.1; CoA transferase [Roseibium alexandrii]}	{NA}	{NA}	{WP.106682859.1; COG1804 Crotonobetainyl-CoA:carnitine CoA-transferase CaiB and related acyl-CoA transferases I Lipid transport and metabolism ;}	{NA}	{GO:0008152; NA GO:0003824; NA}	{NA}	{NA}	{NA}	{NA}	{NA}	{false}	{NA}	{PF02515:CoA-transferase family III}
MAR44G.1_GM000018	{Scaffold1:21619:22785:+}	{WP_055673688.1; acyl-CoA dehydrogenase family protein [Roseibium alexandrii]}	{NA}	{labp:FJ695_02845; K00249 ACADM, acd acyl-CoA dehydrogenase 1.3.8.7 Metabolism; Lipid metabolism; Fatty acid degradation [PATH:ko00071] Metabolism; Amino acid metabolism; Valine, leucine and isoleucine degradation [PATH:ko00280] Organismal Systems; Endocrine system; PPAR signaling pathway [PATH:ko03320] Human Diseases; Endocrine and metabolic disease; Alcoholic liver disease [PATH:ko04936]}	{WP.011160085.1; COG1960 Acyl-CoA dehydrogenase related to the alkylation response protein AidB I Lipid transport and metabolism ;}	{NA}	{GO:0016491; oxidoreductase activity; molecular_function GO:0003995; acyl-CoA dehydrogenase activity; molecular_function GO:0004040; amidase activity; molecular_function GO:0008152; NA GO:0009253; peptidoglycan catabolic process; biological_process GO:0055114; oxidation-reduction process; biological_process GO:0016627; oxidoreductase activity, acting on the CH-CH group of donors; molecular_functi…	{PHI:7214; A0A0F6AZ27 STM14_1005 28901 Salmonella enterica salmonellosis Mus musculus (related: house mouse) Putative acyl-CoA dehydrogenase Gene deletion: full reduced virulence}	{NA}	{NA}	{NA}	{NA}	{false}	{NA}	{PF01832:Mannosyl-glycoprotein endo-beta-N-acetylglucosaminidase PF02770:Acyl-CoA dehydrogenase, middle domain PF02771:Acyl-CoA dehydrogenase, N-terminal domain PF08028:Acyl-CoA dehydrogenase, C-terminal domain PF00441:Acyl-CoA dehydrogenase, C-terminal domain}
MAR44G.1_GM000019	{Scaffold1:22817:24622:+}	{WP_050776019.1; acyl-CoA dehydrogenase family protein [Roseibium alexandrii]}	{NA}	{labp:FJ695_02850; K00249 ACADM, acd acyl-CoA dehydrogenase 1.3.8.7 Metabolism; Lipid metabolism; Fatty acid degradation [PATH:ko00071] Metabolism; Amino acid metabolism; Valine, leucine and isoleucine degradation [PATH:ko00280] Organismal Systems; Endocrine system; PPAR signaling pathway [PATH:ko03320] Human Diseases; Endocrine and metabolic disease; Alcoholic liver disease [PATH:ko04936]}	{WP.013394093.1; COG1960 Acyl-CoA dehydrogenase related to the alkylation response protein AidB I Lipid transport and metabolism ;}	{NA}	{GO:0016627; oxidoreductase activity, acting on the CH-CH group of donors; molecular_function GO:0003995; acyl-CoA dehydrogenase activity; molecular_function GO:0016491; oxidoreductase activity; molecular_function GO:0055114; oxidation-reduction process; biological_process}	{NA}	{NA}	{NA}	{NA}	{NA}	{false}	{NA}	{PF08028:Acyl-CoA dehydrogenase, C-terminal domain PF00441:Acyl-CoA dehydrogenase, C-terminal domain PF02770:Acyl-CoA dehydrogenase, middle domain}
MAR44G.1_GM000020	{Scaffold1:24650:26473:+}	{WP_008195344.1; acyl-CoA dehydrogenase family protein [Roseibium alexandrii]}	{NA}	{labp:FJ695_02855; K00249 ACADM, acd acyl-CoA dehydrogenase 1.3.8.7 Metabolism; Lipid metabolism; Fatty acid degradation [PATH:ko00071] Metabolism; Amino acid metabolism; Valine, leucine and isoleucine degradation [PATH:ko00280] Organismal Systems; Endocrine system; PPAR signaling pathway [PATH:ko03320] Human Diseases; Endocrine and metabolic disease; Alcoholic liver disease [PATH:ko04936]}	{WP.096358537.1; COG1960 Acyl-CoA dehydrogenase related to the alkylation response protein AidB I Lipid transport and metabolism ;}	{NA}	{GO:0055114; oxidation-reduction process; biological_process GO:0016491; oxidoreductase activity; molecular_function GO:0003995; acyl-CoA dehydrogenase activity; molecular_function GO:0016627; oxidoreductase activity, acting on the CH-CH group of donors; molecular_function}	{NA}	{NA}	{NA}	{NA}	{NA}	{true}	{NA}	{PF00441:Acyl-CoA dehydrogenase, C-terminal domain PF08028:Acyl-CoA dehydrogenase, C-terminal domain PF02770:Acyl-CoA dehydrogenase, middle domain}
MAR44G.1_GM000021	{Scaffold1:26496:27692:+}	{WP_055673649.1; CoA transferase [Roseibium alexandrii]}	{NA}	{labp:FJ695_02860; K18702 uctC CoA:oxalate CoA-transferase 2.8.3.19 --}	{WP.054538374.1; COG1804 Crotonobetainyl-CoA:carnitine CoA-transferase CaiB and related acyl-CoA transferases I Lipid transport and metabolism ;}	{NA}	{GO:0003824; NA GO:0008152; NA}	{NA}	{NA}	{NA}	{NA}	{NA}	{false}	{NA}	{PF02515:CoA-transferase family III}
MAR44G.1_GM000022	{Scaffold1:27685:29232:+}	{WP_008191875.1; acyl-CoA synthetase [Roseibium alexandrii]}	{NA}	{labp:FJ695_02865; K01897 ACSL, fadD long-chain acyl-CoA synthetase 6.2.1.3 Metabolism; Lipid metabolism; Fatty acid biosynthesis [PATH:ko00061] Metabolism; Lipid metabolism; Fatty acid degradation [PATH:ko00071] Cellular Processes; Transport and catabolism; Peroxisome [PATH:ko04146] Cellular Processes; Cell growth and death; Ferroptosis [PATH:ko04216] Cellular Processes; Cellular community - pro…	{WP.014496870.1; COG0318 O-succinylbenzoic acid-CoA ligase MenE or related acyl-CoA synthetase (AMP-forming) I Lipid transport and metabolism ;}	{NA}	{GO:0003824; NA GO:0008152; NA}	{NA}	{NA}	{NA}	{NA}	{NA}	{false}	{NA}	{PF00501:AMP-binding enzyme}
MAR44G.1_GM000023	{Scaffold1:29295:30458:+}	{CTQ76041.1; Acyl-CoA dehydrogenase [Roseibium alexandrii]}	{NA}	{NA}	{WP.066850301.1; COG1960 Acyl-CoA dehydrogenase related to the alkylation response protein AidB I Lipid transport and metabolism ;}	{NA}	{GO:0008152; NA GO:0016491; oxidoreductase activity; molecular_function GO:0055114; oxidation-reduction process; biological_process GO:0050660; flavin adenine dinucleotide binding; molecular_function GO:0016627; oxidoreductase activity, acting on the CH-CH group of donors; molecular_function GO:0003995; acyl-CoA dehydrogenase activity; molecular_function}	{NA}	{NA}	{NA}	{NA}	{NA}	{false}	{NA}	{PF02771:Acyl-CoA dehydrogenase, N-terminal domain PF08028:Acyl-CoA dehydrogenase, C-terminal domain PF00441:Acyl-CoA dehydrogenase, C-terminal domain PF02770:Acyl-CoA dehydrogenase, middle domain}
MAR44G.1_GM000024	{Scaffold1:30580:31065:+}	{WP_055673652.1; GNAT family N-acetyltransferase [Roseibium alexandrii]}	{NA}	{NA}	{WP.054539083.1; COG3153 Predicted N-acetyltransferase YhbS R General function prediction only ;}	{NA}	{GO:0008080; N-acetyltransferase activity; molecular_function}	{NA}	{NA}	{NA}	{NA}	{NA}	{false}	{NA}	{PF00583:Acetyltransferase (GNAT) family PF13508:Acetyltransferase (GNAT) domain PF13673:Acetyltransferase (GNAT) domain}
MAR44G.1_GM000025	{Scaffold1:31147:32490:-}	{WP_055673653.1; TRAP transporter large permease [Roseibium alexandrii]}	{NA}	{labp:FJ695_03445; K11690 dctM C4-dicarboxylate transporter, DctM subunit -- Environmental Information Processing; Signal transduction; Two-component system [PATH:ko02020]}	{WP.127750573.1; COG1593 TRAP-type C4-dicarboxylate transport system, large permease component G Carbohydrate transport and metabolism ;}	{NA}	{NA}	{NA}	{NA}	{NA}	{NA}	{NA}	{false}	{NA}	{NA}
MAR44G.1_GM000026	{Scaffold1:32545:33144:-}	{WP_050776020.1; TRAP transporter small permease [Roseibium alexandrii]}	{NA}	{NA}	{WP.117413527.1; COG3090 TRAP-type C4-dicarboxylate transport system, small permease component YiaM G Carbohydrate transport and metabolism ;}	{NA}	{GO:0016021; integral to membrane; cellular_component}	{NA}	{NA}	{NA}	{NA}	{NA}	{false}	{NA}	{PF04750:FAR-17a/AIG1-like protein}
MAR44G.1_GM000027	{Scaffold1:33132:34244:-}	{WP_209002636.1; C4-dicarboxylate TRAP transporter substrate-binding protein [Roseibium alexandrii]}	{NA}	{NA}	{WP.127750575.1; COG1638 TRAP-type C4-dicarboxylate transport system, periplasmic component G Carbohydrate transport and metabolism ;}	{NA}	{GO:0005215; NA GO:0030288; outer membrane-bounded periplasmic space; cellular_component GO:0006810; transport; biological_process}	{NA}	{NA}	{NA}	{NA}	{NA}	{false}	{NA}	{PF00497:Bacterial extracellular solute-binding proteins, family 3 PF03480:Bacterial extracellular solute-binding protein, family 7}
MAR44G.1_GM000028	{Scaffold1:34391:35536:-}	{WP_055673656.1; CaiB/BaiF CoA-transferase family protein [Roseibium alexandrii]}	{O06543; Alpha-methylacyl-CoA racemase }	{labp:FJ695_03460; K01796 E5.1.99.4, AMACR, mcr alpha-methylacyl-CoA racemase 5.1.99.4 Metabolism; Lipid metabolism; Primary bile acid biosynthesis [PATH:ko00120] Cellular Processes; Transport and catabolism; Peroxisome [PATH:ko04146]}	{WP.014434939.1; COG1804 Crotonobetainyl-CoA:carnitine CoA-transferase CaiB and related acyl-CoA transferases I Lipid transport and metabolism ;}	{NA}	{GO:0003824; NA GO:0008152; NA}	{NA}	{NA}	{NA}	{NA}	{NA}	{false}	{NA}	{PF02515:CoA-transferase family III}
MAR44G.1_GM000029	{Scaffold1:35570:36058:-}	{CTQ76056.1; Salmolysin [Roseibium alexandrii]}	{NA}	{labp:FJ695_03465; K06075 slyA MarR family transcriptional regulator, transcriptional regulator for hemolysin -- --}	{WP.014744214.1; COG1846 DNA-binding transcriptional regulator, MarR family K Transcription ;}	{NA}	{GO:0005622; intracellular; cellular_component GO:0003700; sequence-specific DNA binding transcription factor activity; molecular_function GO:0003677; DNA binding; molecular_function GO:0045892; negative regulation of transcription, DNA-dependent; biological_process GO:0006355; regulation of transcription, DNA-dependent; biological_process}	{NA}	{NA}	{NA}	{NA}	{NA}	{false}	{NA}	{PF09339:IclR helix-turn-helix domain PF01047:MarR family PF01325:Iron dependent repressor, N-terminal DNA binding domain PF03965:Penicillinase repressor PF00392:Bacterial regulatory proteins, gntR family PF13463:Winged helix DNA-binding domain}
MAR44G.1_GM000030	{Scaffold1:36036:36896:-}	{WP_055673658.1; MaoC/PaaZ C-terminal domain-containing protein [Roseibium alexandrii]}	{I6YBZ8; 3-hydroxyacyl-thioester dehydratase Y }	{NA}	{WP.106750213.1; COG2030 Acyl-CoA dehydratase PaaZ I Lipid transport and metabolism ;}	{NA}	{GO:0016491; oxidoreductase activity; molecular_function GO:0008152; NA}	{NA}	{NA}	{NA}	{NA}	{NA}	{false}	{NA}	{PF01575:MaoC like domain}
MAR44G.1_GM000031	{Scaffold1:36896:37822:-}	{WP_134853067.1; SDR family oxidoreductase [Roseibium alexandrii]}	{P96825; Putative short-chain type dehydrogenase/reductase Rv0148 }	{NA}	{WP.014744215.1; COG1028 NAD(P)-dependent dehydrogenase, short-chain alcohol dehydrogenase family I Lipid transport and metabolism ;}	{NA}	{GO:0003824; NA GO:0004488; methylenetetrahydrofolate dehydrogenase (NADP+) activity; molecular_function GO:0006631; fatty acid metabolic process; biological_process GO:0016491; oxidoreductase activity; molecular_function GO:0003857; 3-hydroxyacyl-CoA dehydrogenase activity; molecular_function GO:0055114; oxidation-reduction process; biological_process GO:0009396; folic acid-containing compound b…	{NA}	{NA}	{NA}	{NA}	{NA}	{false}	{NA}	{PF00106:short chain dehydrogenase PF02882:Tetrahydrofolate dehydrogenase/cyclohydrolase, NAD(P)-binding domain PF02737:3-hydroxyacyl-CoA dehydrogenase, NAD binding domain}
MAR44G.1_GM000032	{Scaffold1:37976:38428:+}	{WP_186009140.1; PaaI family thioesterase [Roseibium alexandrii]}	{NA}	{NA}	{WP.048529509.1; COG2050 Acyl-CoA thioesterase PaaI, contains HGG motif Q Secondary metabolites biosynthesis, transport and catabolism ;}	{gnl|TC-DB|WP_043136389; 9.B.371.1.5 PaaI family thioesterase [Mameliella alba]}	{NA}	{NA}	{NA}	{NA}	{NA}	{NA}	{false}	{NA}	{NA}
MAR44G.1_GM000033	{Scaffold1:38458:39945:+}	{WP_008193102.1; 3-oxoacyl-[acyl-carrier-protein] synthase III C-terminal domain-containing protein [Roseibium alexandrii]}	{NA}	{NA}	{WP.106750211.1; COG3425 3-hydroxy-3-methylglutaryl CoA synthase I Lipid transport and metabolism ;}	{NA}	{GO:0004315; 3-oxoacyl-[acyl-carrier-protein] synthase activity; molecular_function GO:0006633; fatty acid biosynthetic process; biological_process GO:0016747; transferase activity, transferring acyl groups other than amino-acyl groups; molecular_function GO:0008610; lipid biosynthetic process; biological_process}	{NA}	{NA}	{NA}	{NA}	{NA}	{false}	{NA}	{PF08545:3-Oxoacyl-[acyl-carrier-protein (ACP)] synthase III PF08541:3-Oxoacyl-[acyl-carrier-protein (ACP)] synthase III C terminal }
MAR44G.1_GM000034	{Scaffold1:39958:41163:+}	{WP_008192857.1; acetyl-CoA acetyltransferase [Roseibium alexandrii]}	{NA}	{labp:FJ695_03490; K00626 ACAT, atoB acetyl-CoA C-acetyltransferase 2.3.1.9 Metabolism; Carbohydrate metabolism; Pyruvate metabolism [PATH:ko00620] Metabolism; Carbohydrate metabolism; Glyoxylate and dicarboxylate metabolism [PATH:ko00630] Metabolism; Carbohydrate metabolism; Butanoate metabolism [PATH:ko00650] Metabolism; Energy metabolism; Carbon fixation pathways in prokaryotes [PATH:ko00720] …	{WP.096358093.1; COG0183 Acetyl-CoA acetyltransferase I Lipid transport and metabolism ;}	{NA}	{GO:0008152; NA GO:0016747; transferase activity, transferring acyl groups other than amino-acyl groups; molecular_function}	{NA}	{NA}	{NA}	{NA}	{NA}	{false}	{NA}	{PF00108:Thiolase, N-terminal domain PF02803:Thiolase, C-terminal domain}
MAR44G.1_GM000035	{Scaffold1:41269:42048:+}	{WP_008193106.1; enoyl-CoA hydratase-related protein [Roseibium alexandrii]}	{P77467; 1,2-epoxyphenylacetyl-CoA isomerase }	{labp:FJ695_03495; K15866 paaG 2-(1,2-epoxy-1,2-dihydrophenyl)acetyl-CoA isomerase 5.3.3.18 Metabolism; Amino acid metabolism; Phenylalanine metabolism [PATH:ko00360]}	{WP.042441626.1; COG1024 Enoyl-CoA hydratase/carnithine racemase I Lipid transport and metabolism ;}	{NA}	{GO:0008152; NA GO:0003824; NA}	{NA}	{NA}	{NA}	{NA}	{NA}	{false}	{NA}	{PF00378:Enoyl-CoA hydratase/isomerase}
MAR44G.1_GM000036	{Scaffold1:42069:43592:+}	{WP_055673663.1; AMP-binding protein [Roseibium alexandrii]}	{NA}	{labp:FJ695_03500; K01897 ACSL, fadD long-chain acyl-CoA synthetase 6.2.1.3 Metabolism; Lipid metabolism; Fatty acid biosynthesis [PATH:ko00061] Metabolism; Lipid metabolism; Fatty acid degradation [PATH:ko00071] Cellular Processes; Transport and catabolism; Peroxisome [PATH:ko04146] Cellular Processes; Cell growth and death; Ferroptosis [PATH:ko04216] Cellular Processes; Cellular community - pro…	{WP.096358798.1; COG0318 O-succinylbenzoic acid-CoA ligase MenE or related acyl-CoA synthetase (AMP-forming) I Lipid transport and metabolism ;}	{NA}	{GO:0008152; NA GO:0003824; NA}	{NA}	{NA}	{NA}	{NA}	{NA}	{false}	{NA}	{PF00501:AMP-binding enzyme}
MAR44G.1_GM000037	{Scaffold1:43607:45748:+}	{WP_055673664.1; acetate--CoA ligase family protein [Roseibium alexandrii]}	{NA}	{labp:FJ695_03505; K24012 acdAB acetate---CoA ligase (ADP-forming) 6.2.1.13 Metabolism; Carbohydrate metabolism; Glycolysis / Gluconeogenesis [PATH:ko00010] Metabolism; Carbohydrate metabolism; Pyruvate metabolism [PATH:ko00620] Metabolism; Carbohydrate metabolism; Propanoate metabolism [PATH:ko00640]}	{WP.085945364.1; COG1042 Acyl-CoA synthetase (NDP forming) C Energy production and conversion ;}	{NA}	{GO:0048037; cofactor binding; molecular_function}	{NA}	{NA}	{NA}	{NA}	{NA}	{false}	{NA}	{PF02629:CoA binding domain PF13380:CoA binding domain}
MAR44G.1_GM000038	{Scaffold1:45750:46952:+}	{WP_055673665.1; CoA transferase [Roseibium alexandrii]}	{NA}	{NA}	{WP.015802902.1; COG1804 Crotonobetainyl-CoA:carnitine CoA-transferase CaiB and related acyl-CoA transferases I Lipid transport and metabolism ;}	{NA}	{GO:0003824; NA GO:0008152; NA}	{NA}	{NA}	{NA}	{NA}	{NA}	{false}	{NA}	{PF02515:CoA-transferase family III}
MAR44G.1_GM000039	{Scaffold1:47115:47561:+}	{WP_008194148.1; MarR family transcriptional regulator [Roseibium alexandrii]}	{NA}	{labp:FJ695_03515; K06075 slyA MarR family transcriptional regulator, transcriptional regulator for hemolysin -- --}	{WP.052763540.1; COG1846 DNA-binding transcriptional regulator, MarR family K Transcription ;}	{NA}	{GO:0043565; sequence-specific DNA binding; molecular_function GO:0045892; negative regulation of transcription, DNA-dependent; biological_process GO:0006355; regulation of transcription, DNA-dependent; biological_process GO:0003700; sequence-specific DNA binding transcription factor activity; molecular_function GO:0003677; DNA binding; molecular_function GO:0005622; intracellular; cellular_compo…	{NA}	{NA}	{NA}	{NA}	{NA}	{false}	{NA}	{PF01325:Iron dependent repressor, N-terminal DNA binding domain PF00392:Bacterial regulatory proteins, gntR family PF03965:Penicillinase repressor PF09339:IclR helix-turn-helix domain PF01047:MarR family PF01381:Helix-turn-helix PF13463:Winged helix DNA-binding domain}
MAR44G.1_GM000040	{Scaffold1:47775:48254:+}	{CTQ76088.1; bifunctional enoyl-CoA hydratase/phosphate acetyltransferase [Roseibium alexandrii]}	{NA}	{NA}	{WP.041700575.1; COG2030 Acyl-CoA dehydratase PaaZ I Lipid transport and metabolism ;}	{NA}	{GO:0016491; oxidoreductase activity; molecular_function GO:0008152; NA}	{NA}	{NA}	{NA}	{NA}	{NA}	{false}	{NA}	{PF01575:MaoC like domain}
MAR44G.1_GM000041	{Scaffold1:48327:49520:+}	{WP_055673666.1; acyl-CoA dehydrogenase family protein [Roseibium alexandrii]}	{NA}	{NA}	{WP.066920405.1; COG1960 Acyl-CoA dehydrogenase related to the alkylation response protein AidB I Lipid transport and metabolism ;}	{NA}	{GO:0016491; oxidoreductase activity; molecular_function GO:0008152; NA GO:0055114; oxidation-reduction process; biological_process GO:0016627; oxidoreductase activity, acting on the CH-CH group of donors; molecular_function GO:0050660; flavin adenine dinucleotide binding; molecular_function GO:0003995; acyl-CoA dehydrogenase activity; molecular_function}	{PHI:7214; A0A0F6AZ27 STM14_1005 28901 Salmonella enterica salmonellosis Mus musculus (related: house mouse) Putative acyl-CoA dehydrogenase Gene deletion: full reduced virulence}	{NA}	{NA}	{NA}	{NA}	{false}	{NA}	{PF02771:Acyl-CoA dehydrogenase, N-terminal domain PF08028:Acyl-CoA dehydrogenase, C-terminal domain PF00441:Acyl-CoA dehydrogenase, C-terminal domain PF02770:Acyl-CoA dehydrogenase, middle domain}
MAR44G.1_GM000042	{Scaffold1:49534:50670:+}	{WP_055673667.1; acyl-CoA dehydrogenase family protein [Roseibium alexandrii]}	{NA}	{NA}	{WP.096356509.1; COG1960 Acyl-CoA dehydrogenase related to the alkylation response protein AidB I Lipid transport and metabolism ;}	{NA}	{GO:0003995; acyl-CoA dehydrogenase activity; molecular_function GO:0016627; oxidoreductase activity, acting on the CH-CH group of donors; molecular_function GO:0050660; flavin adenine dinucleotide binding; molecular_function GO:0055114; oxidation-reduction process; biological_process GO:0016491; oxidoreductase activity; molecular_function GO:0008152; NA}	{NA}	{NA}	{NA}	{NA}	{NA}	{false}	{NA}	{PF08028:Acyl-CoA dehydrogenase, C-terminal domain PF00441:Acyl-CoA dehydrogenase, C-terminal domain PF02771:Acyl-CoA dehydrogenase, N-terminal domain PF02770:Acyl-CoA dehydrogenase, middle domain}
MAR44G.1_GM000043	{Scaffold1:50759:51655:-}	{CTQ76097.1; hypothetical protein LAX5112_04465 [Roseibium alexandrii]}	{NA}	{NA}	{NA}	{NA}	{NA}	{NA}	{NA}	{NA}	{NA}	{YES}	{false}	{NA}	{NA}
MAR44G.1_GM000044	{Scaffold1:51738:51890:-}	{NA}	{NA}	{NA}	{NA}	{NA}	{NA}	{NA}	{NA}	{NA}	{NA}	{NA}	{false}	{NA}	{NA}
MAR44G.1_GM000045	{Scaffold1:52153:53460:+}	{WP_144432234.1; pilus assembly protein [Roseibium alexandrii]}	{NA}	{NA}	{NA}	{NA}	{NA}	{NA}	{NA}	{NA}	{NA}	{NA}	{false}	{NA}	{NA}
MAR44G.1_GM000046	{Scaffold1:53471:54010:+}	{WP_055673670.1; pilus assembly protein [Roseibium alexandrii]}	{NA}	{NA}	{NA}	{NA}	{NA}	{NA}	{NA}	{NA}	{NA}	{NA}	{false}	{NA}	{NA}
MAR44G.1_GM000047	{Scaffold1:54013:54576:+}	{WP_055673671.1; pilus assembly protein [Roseibium alexandrii]}	{NA}	{NA}	{NA}	{NA}	{NA}	{NA}	{NA}	{NA}	{NA}	{NA}	{false}	{NA}	{NA}
MAR44G.1_GM000048	{Scaffold1:54643:55446:-}	{WP_055673692.1; nitroreductase family protein [Roseibium alexandrii]}	{F4KU78; Iodotyrosine deiodinase }	{labp:FJ695_02765; K17231 IYD, DEHAL1 iodotyrosine deiodinase 1.21.1.1 Organismal Systems; Endocrine system; Thyroid hormone synthesis [PATH:ko04918]}	{WP.077291238.1; COG0778 Nitroreductase C Energy production and conversion ;}	{NA}	{GO:0016491; oxidoreductase activity; molecular_function}	{NA}	{NA}	{NA}	{NA}	{NA}	{false}	{NA}	{PF00881:Nitroreductase family}
MAR44G.1_GM000049	{Scaffold1:55752:56747:+}	{WP_008194446.1; ABC transporter substrate-binding protein [Roseibium alexandrii]}	{NA}	{lagg:B0E33_11025; K02051 ABC.SN.S NitT/TauT family transport system substrate-binding protein -- --}	{WP.022999267.1; COG0715 ABC-type nitrate/sulfonate/bicarbonate transport system, periplasmic component P Inorganic ion transport and metabolism ;}	{NA}	{NA}	{NA}	{NA}	{NA}	{NA}	{YES}	{false}	{NA}	{NA}
MAR44G.1_GM000050	{Scaffold1:56889:59147:+}	{WP_208981493.1; EAL domain-containing protein [Roseibium alexandrii]}	{NA}	{NA}	{WP.077291237.1; COG5001 Cyclic di-GMP metabolism protein, combines GGDEF and EAL domains with a 6TM membrane domain T Signal transduction mechanisms ;}	{NA}	{GO:0004252; serine-type endopeptidase activity; molecular_function GO:0005886; plasma membrane; cellular_component}	{NA}	{NA}	{NA}	{NA}	{NA}	{false}	{NA}	{PF08496:Peptidase family S49 N-terminal}
MAR44G.1_GM000051	{Scaffold1:59170:59271:-}	{CTQ76115.1; hypothetical protein LAX5112_04472 [Roseibium alexandrii]}	{NA}	{NA}	{NA}	{NA}	{NA}	{NA}	{NA}	{NA}	{NA}	{NA}	{false}	{NA}	{NA}
MAR44G.1_GM000052	{Scaffold1:59273:60712:-}	{WP_055673672.1; BCCT family transporter [Roseibium alexandrii]}	{NA}	{labp:FJ695_02750; K05020 opuD, betL glycine betaine transporter -- --}	{WP.011221701.1; COG1292 Choline-glycine betaine transporter M Cell wall/membrane/envelope biogenesis ;}	{NA}	{GO:0016020; membrane; cellular_component GO:0005215; NA GO:0006810; transport; biological_process}	{NA}	{NA}	{NA}	{NA}	{NA}	{false}	{NA}	{PF02028:BCCT, betaine/carnitine/choline family transporter}
MAR44G.1_GM000053	{Scaffold1:61109:63859:+}	{WP_268873431.1; molybdopterin oxidoreductase family protein [Roseibium alexandrii]}	{D3RNN8; Sulfite dehydrogenase subunit A }	{labp:FJ695_02745; K21307 soeA sulfite dehydrogenase (quinone) subunit SoeA 1.8.5.6 Metabolism; Energy metabolism; Sulfur metabolism [PATH:ko00920]}	{WP.076629209.1; COG0243 Anaerobic selenocysteine-containing dehydrogenase C Energy production and conversion ;}	{gnl|TC-DB|O67280; 5.A.3.11.2 DMSO reductase chain A - Aquifex aeolicus.}	{GO:0016491; oxidoreductase activity; molecular_function GO:0030151; molybdenum ion binding; molecular_function GO:0055114; oxidation-reduction process; biological_process}	{NA}	{NA}	{NA}	{NA}	{NA}	{false}	{NA}	{PF04879:Molybdopterin oxidoreductase Fe4S4 domain PF01568:Molydopterin dinucleotide binding domain PF00384:Molybdopterin oxidoreductase}
MAR44G.1_GM000054	{Scaffold1:63856:64602:+}	{WP_055673673.1; 4Fe-4S dicluster domain-containing protein [Roseibium alexandrii]}	{D3RNN7; Sulfite dehydrogenase subunit B }	{labp:FJ695_02740; K21308 soeB sulfite dehydrogenase (quinone) subunit SoeB -- Metabolism; Energy metabolism; Sulfur metabolism [PATH:ko00920]}	{WP.094033790.1; COG0437 Fe-S-cluster-containing dehydrogenase component (DMSO reductase) C Energy production and conversion ;}	{gnl|TC-DB|O67279; 5.A.3.11.2 DMSO reductase chain B - Aquifex aeolicus.}	{GO:0051536; iron-sulfur cluster binding; molecular_function}	{NA}	{NA}	{NA}	{NA}	{NA}	{false}	{NA}	{PF12838:4Fe-4S dicluster domain PF12798:4Fe-4S binding domain PF12797:4Fe-4S binding domain PF00037:4Fe-4S binding domain PF12837:4Fe-4S binding domain PF13187:4Fe-4S dicluster domain PF13746:4Fe-4S dicluster domain PF12800:4Fe-4S binding domain PF13183:4Fe-4S dicluster domain PF13247:4Fe-4S dicluster domain PF13237:4Fe-4S dicluster domain}
MAR44G.1_GM000055	{Scaffold1:64602:65477:+}	{WP_055673674.1; dimethyl sulfoxide reductase anchor subunit [Roseibium alexandrii]}	{NA}	{labp:FJ695_02735; K21309 soeC sulfite dehydrogenase (quinone) subunit SoeC -- Metabolism; Energy metabolism; Sulfur metabolism [PATH:ko00920]}	{AII85734.1; COG3302 DMSO reductase anchor subunit DmsC C Energy production and conversion ;}	{NA}	{GO:0016021; integral to membrane; cellular_component GO:0019645; anaerobic electron transport chain; biological_process}	{NA}	{NA}	{NA}	{NA}	{NA}	{false}	{NA}	{PF04976:DMSO reductase anchor subunit (DmsC)}
MAR44G.1_GM000056	{Scaffold1:65537:66850:-}	{WP_055673675.1; NAD-dependent dihydropyrimidine dehydrogenase subunit PreA [Roseibium alexandrii]}	{Q8ZNL7; NAD-dependent dihydropyrimidine dehydrogenase subunit PreA }	{labp:FJ695_02730; K17723 preA dihydropyrimidine dehydrogenase (NAD+) subunit PreA 1.3.1.1 Metabolism; Nucleotide metabolism; Pyrimidine metabolism [PATH:ko00240] Metabolism; Metabolism of other amino acids; beta-Alanine metabolism [PATH:ko00410] Metabolism; Metabolism of cofactors and vitamins; Pantothenate and CoA biosynthesis [PATH:ko00770]}	{WP.022999265.1; COG1144 Pyruvate:ferredoxin oxidoreductase or related 2-oxoacid:ferredoxin oxidoreductase, delta subunit C Energy production and conversion ;}	{NA}	{GO:0008033; tRNA processing; biological_process GO:0055114; oxidation-reduction process; biological_process GO:0004152; dihydroorotate dehydrogenase activity; molecular_function GO:0050660; flavin adenine dinucleotide binding; molecular_function GO:0051536; iron-sulfur cluster binding; molecular_function GO:0017150; tRNA dihydrouridine synthase activity; molecular_function GO:0018580; nitronate …	{NA}	{NA}	{NA}	{NA}	{NA}	{false}	{NA}	{PF13746:4Fe-4S dicluster domain PF13187:4Fe-4S dicluster domain PF13237:4Fe-4S dicluster domain PF13183:4Fe-4S dicluster domain PF01180:Dihydroorotate dehydrogenase PF01207:Dihydrouridine synthase (Dus) PF12800:4Fe-4S binding domain PF00037:4Fe-4S binding domain PF12837:4Fe-4S binding domain PF03060:Nitronate monooxygenase PF12797:4Fe-4S binding domain PF12838:4Fe-4S dicluster domain}
MAR44G.1_GM000057	{Scaffold1:66871:68259:-}	{WP_055673695.1; NAD(P)-dependent oxidoreductase [Roseibium alexandrii]}	{NA}	{labp:FJ695_02725; K17722 preT dihydropyrimidine dehydrogenase (NAD+) subunit PreT 1.3.1.1 Metabolism; Nucleotide metabolism; Pyrimidine metabolism [PATH:ko00240] Metabolism; Metabolism of other amino acids; beta-Alanine metabolism [PATH:ko00410] Metabolism; Metabolism of cofactors and vitamins; Pantothenate and CoA biosynthesis [PATH:ko00770]}	{WP.055659228.1; COG0493 NADPH-dependent glutamate synthase beta chain or related oxidoreductase ER Amino acid transport and metabolism ; General function prediction only ;}	{NA}	{GO:0051287; NAD binding; molecular_function GO:0019354; siroheme biosynthetic process; biological_process GO:0008652; cellular amino acid biosynthetic process; biological_process GO:0016616; oxidoreductase activity, acting on the CH-OH group of donors, NAD or NADP as acceptor; molecular_function GO:0008033; tRNA processing; biological_process GO:0006779; porphyrin biosynthetic process; biologica…	{NA}	{NA}	{NA}	{NA}	{NA}	{false}	{NA}	{PF00743:Flavin-binding monooxygenase-like PF03446:NAD binding domain of 6-phosphogluconate dehydrogenase PF05834:Lycopene cyclase protein PF01210:NAD-dependent glycerol-3-phosphate dehydrogenase N-terminus PF13237:4Fe-4S dicluster domain PF01266:FAD dependent oxidoreductase PF03721:UDP-glucose/GDP-mannose dehydrogenase family, NAD binding domain PF13241:Putative NAD(P)-binding PF02558:Ketopantoa…
MAR44G.1_GM000058	{Scaffold1:68549:69055:+}	{WP_055673676.1; GNAT family N-acetyltransferase [Roseibium alexandrii]}	{NA}	{labp:FJ695_02720; K03790 rimJ [ribosomal protein S5]-alanine N-acetyltransferase 2.3.1.267 --}	{WP.038585210.1; COG1670 Protein N-acetyltransferase, RimJ/RimL family JO Translation, ribosomal structure and biogenesis ; Posttranslational modification, protein turnover, chaperones ;}	{NA}	{GO:0008080; N-acetyltransferase activity; molecular_function}	{NA}	{NA}	{NA}	{NA}	{NA}	{false}	{NA}	{PF13302:Acetyltransferase (GNAT) domain PF13508:Acetyltransferase (GNAT) domain PF00583:Acetyltransferase (GNAT) family}
MAR44G.1_GM000059	{Scaffold1:69790:70014:+}	{SOC42029.1; CspA family cold shock protein [Rhizobium subbaraonis]}	{P55390; Probable cold shock protein y4cH }	{ead:OV14_3847; K03704 cspA cold shock protein -- --}	{WP.062491466.1; COG1278 Cold shock protein, CspA family K Transcription ;}	{NA}	{GO:0003677; DNA binding; molecular_function GO:0006355; regulation of transcription, DNA-dependent; biological_process}	{PHI:4190; Q8YIE6 cspA 29459 Brucella melitensis ovine brucellosis Mus musculus (related: house mouse) Cold shock protein Gene mutation; gene complementation reduced virulence}	{NA}	{NA}	{NA}	{NA}	{false}	{NA}	{PF00313:'Cold-shock' DNA-binding domain}
MAR44G.1_GM000060	{Scaffold1:70149:70388:+}	{WP_008189908.1; hypothetical protein [Roseibium alexandrii]}	{NA}	{NA}	{NA}	{NA}	{NA}	{NA}	{NA}	{NA}	{NA}	{NA}	{false}	{NA}	{NA}
MAR44G.1_GM000061	{Scaffold1:70410:70790:+}	{WP_008190247.1; DUF6481 family protein [Roseibium alexandrii]}	{NA}	{NA}	{NA}	{NA}	{NA}	{NA}	{NA}	{NA}	{NA}	{NA}	{false}	{NA}	{NA}
MAR44G.1_GM000062	{Scaffold1:71433:72194:+}	{WP_055673679.1; serine protease [Roseibium alexandrii]}	{NA}	{NA}	{NA}	{NA}	{NA}	{NA}	{NA}	{NA}	{NA}	{NA}	{false}	{NA}	{NA}
MAR44G.1_GM000063	{Scaffold1:72301:72423:-}	{NA}	{NA}	{NA}	{NA}	{NA}	{NA}	{NA}	{NA}	{NA}	{NA}	{NA}	{false}	{NA}	{NA}
MAR44G.1_GM000064	{Scaffold1:72496:72957:-}	{WP_055673681.1; cupin domain-containing protein [Roseibium alexandrii]}	{NA}	{NA}	{WP.115836146.1; COG0662 Mannose-6-phosphate isomerase, cupin superfamily G Carbohydrate transport and metabolism ;}	{NA}	{GO:0045735; NA GO:0004872; receptor activity; molecular_function GO:0010309; acireductone dioxygenase [iron(II)-requiring] activity; molecular_function GO:0006355; regulation of transcription, DNA-dependent; biological_process GO:0005788; endoplasmic reticulum lumen; cellular_component GO:0055114; oxidation-reduction process; biological_process}	{NA}	{NA}	{NA}	{NA}	{NA}	{false}	{NA}	{PF03079:ARD/ARD' family PF02311:AraC-like ligand binding domain PF00190:Cupin PF02041:Auxin binding protein}
MAR44G.1_GM000065	{Scaffold1:72999:74591:-}	{WP_040451256.1; CRTAC1 family protein [Roseibium alexandrii]}	{NA}	{labp:FJ695_02715; K21162 sgcE4, ncsE4, kedE4 enediyne biosynthesis protein E4 -- Metabolism; Metabolism of terpenoids and polyketides; Biosynthesis of enediyne antibiotics [PATH:ko01059]}	{NA}	{NA}	{NA}	{NA}	{NA}	{NA}	{NA}	{NA}	{false}	{NA}	{NA}
MAR44G.1_GM000066	{Scaffold1:74657:76081:-}	{WP_055673683.1; di-heme oxidoredictase family protein [Roseibium alexandrii]}	{NA}	{NA}	{WP.055656942.1; COG3488 Uncharacterized conserved protein with two CxxC motifs, DUF1111 family R General function prediction only ;}	{NA}	{GO:0020037; heme binding; molecular_function GO:0009055; NA GO:0005506; iron ion binding; molecular_function GO:0016491; oxidoreductase activity; molecular_function GO:0055114; oxidation-reduction process; biological_process}	{NA}	{NA}	{NA}	{NA}	{YES}	{false}	{NA}	{PF03150:Di-haem cytochrome c peroxidase PF13442:Cytochrome C oxidase, cbb3-type, subunit III PF00034:Cytochrome c}
MAR44G.1_GM000067	{Scaffold1:76078:77319:-}	{WP_040451258.1; ROK family protein [Roseibium alexandrii]}	{NA}	{NA}	{NA}	{NA}	{GO:0005622; intracellular; cellular_component GO:0003700; sequence-specific DNA binding transcription factor activity; molecular_function GO:0006355; regulation of transcription, DNA-dependent; biological_process}	{NA}	{NA}	{NA}	{NA}	{NA}	{false}	{NA}	{PF01047:MarR family}
MAR44G.1_GM000068	{Scaffold1:77318:77449:+}	{NA}	{NA}	{NA}	{NA}	{NA}	{NA}	{NA}	{NA}	{NA}	{NA}	{NA}	{false}	{NA}	{NA}
MAR44G.1_GM000069	{Scaffold1:77579:78619:+}	{WP_055673696.1; D-xylose ABC transporter substrate-binding protein [Roseibium alexandrii]}	{P37387; D-xylose-binding periplasmic protein }	{labp:FJ695_02700; K10543 xylF D-xylose transport system substrate-binding protein -- Environmental Information Processing; Membrane transport; ABC transporters [PATH:ko02010]}	{WP.022999249.1; COG4213 ABC-type xylose transport system, periplasmic component G Carbohydrate transport and metabolism ;}	{gnl|TC-DB|P37387; 3.A.1.2.4 D-xylose-binding periplasmic protein precursor - Escherichia coli.}	{GO:0055114; oxidation-reduction process; biological_process GO:0009073; aromatic amino acid family biosynthetic process; biological_process GO:0003856; 3-dehydroquinate synthase activity; molecular_function GO:0016491; oxidoreductase activity; molecular_function}	{PHI:9129; Q2YJE8 bab2_1109 235 Brucella abortus brucellosis Mus musculus (related: house mouse) ABC transporter periplasmic binding protein Gene disruption; gene complementation reduced virulence}	{NA}	{NA}	{NA}	{YES}	{false}	{NA}	{PF01959:3-dehydroquinate synthase (EC 4.6.1.3)}
MAR44G.1_GM000070	{Scaffold1:78660:78743:+}	{NA}	{NA}	{NA}	{NA}	{NA}	{NA}	{NA}	{NA}	{NA}	{NA}	{NA}	{false}	{NA}	{NA}
MAR44G.1_GM000071	{Scaffold1:78749:80038:+}	{WP_040452711.1; sugar ABC transporter permease [Roseibium alexandrii]}	{NA}	{labr:CHH27_20780; K10544 xylH D-xylose transport system permease protein -- Environmental Information Processing; Membrane transport; ABC transporters [PATH:ko02010]}	{WP.031268746.1; COG4214 ABC-type xylose transport system, permease component G Carbohydrate transport and metabolism ;}	{NA}	{GO:0006810; transport; biological_process GO:0005215; NA GO:0016020; membrane; cellular_component}	{NA}	{NA}	{NA}	{NA}	{NA}	{false}	{NA}	{PF02653:Branched-chain amino acid transport system / permease component}
MAR44G.1_GM000072	{Scaffold1:80062:80829:+}	{WP_208326713.1; ATP-binding cassette domain-containing protein [Roseibium alexandrii]}	{P0DTT6; Xylose/arabinose import ATP-binding protein XylG }	{lagg:B0E33_10930; K10545 xylG D-xylose transport system ATP-binding protein 7.5.2.10 Environmental Information Processing; Membrane transport; ABC transporters [PATH:ko02010]}	{WP.006939086.1; COG1129 ABC-type sugar transport system, ATPase component G Carbohydrate transport and metabolism ;}	{gnl|TC-DB|Q9F9B0; 3.A.1.2.7 FRCA (Putative ATP-binding ABC transporter protein) - Rhizobium meliloti (Sinorhizobium meliloti).}	{GO:0016301; kinase activity; molecular_function GO:0003924; GTPase activity; molecular_function GO:0016887; ATPase activity; molecular_function GO:0005525; GTP binding; molecular_function GO:0005524; ATP binding; molecular_function}	{NA}	{NA}	{NA}	{NA}	{NA}	{false}	{NA}	{PF00004:ATPase family associated with various cellular activities (AAA) PF00350:Dynamin family PF03193:Protein of unknown function, DUF258 PF01926:50S ribosome-binding GTPase PF00005:ABC transporter PF06414:Zeta toxin}
MAR44G.1_GM000073	{Scaffold1:80973:82424:+}	{WP_055673915.1; xylulokinase [Roseibium alexandrii]}	{P09099; Xylulose kinase }	{labp:FJ695_02685; K00854 xylB, XYLB xylulokinase 2.7.1.17 Metabolism; Carbohydrate metabolism; Pentose and glucuronate interconversions [PATH:ko00040]}	{WP.077291230.1; COG1070 Sugar (pentulose or hexulose) kinase G Carbohydrate transport and metabolism ;}	{NA}	{GO:0016773; phosphotransferase activity, alcohol group as acceptor; molecular_function GO:0005975; carbohydrate metabolic process; biological_process}	{NA}	{NA}	{NA}	{NA}	{NA}	{false}	{NA}	{PF00370:FGGY family of carbohydrate kinases, N-terminal domain PF02782:FGGY family of carbohydrate kinases, C-terminal domain}
MAR44G.1_GM000074	{Scaffold1:82431:83756:+}	{WP_055673946.1; xylose isomerase [Roseibium alexandrii]}	{Q11EH9; Xylose isomerase }	{labp:FJ695_02680; K01805 xylA xylose isomerase 5.3.1.5 Metabolism; Carbohydrate metabolism; Pentose and glucuronate interconversions [PATH:ko00040] Metabolism; Carbohydrate metabolism; Fructose and mannose metabolism [PATH:ko00051]}	{WP.022999245.1; COG2115 Xylose isomerase G Carbohydrate transport and metabolism ;}	{NA}	{NA}	{NA}	{NA}	{NA}	{NA}	{NA}	{false}	{NA}	{NA}
MAR44G.1_GM000075	{Scaffold1:83851:83997:-}	{WP_082429250.1; DUF2256 domain-containing protein [Roseibium alexandrii]}	{NA}	{NA}	{WP.017468991.1; COG4338 Uncharacterized conserved protein, DUF2256 family S Function unknown ;}	{NA}	{NA}	{NA}	{NA}	{NA}	{NA}	{NA}	{false}	{NA}	{NA}
MAR44G.1_GM000076	{Scaffold1:83994:85553:-}	{WP_055673947.1; deoxyribodipyrimidine photo-lyase [Roseibium alexandrii]}	{Q9KS67; Cryptochrome-like protein cry2 }	{labr:CHH27_20805; K01669 phr, PHR1 deoxyribodipyrimidine photo-lyase 4.1.99.3 --}	{WP.046002260.1; COG0415 Deoxyribodipyrimidine photolyase L Replication, recombination and repair ;}	{NA}	{GO:0006281; DNA repair; biological_process GO:0003913; DNA photolyase activity; molecular_function}	{PHI:4730; Q5NGJ3 FTT0846 263 Francisella tularensis tularemia Mus musculus (related: house mouse) Gene mutation reduced virulence}	{NA}	{NA}	{NA}	{NA}	{false}	{NA}	{PF03441:FAD binding domain of DNA photolyase}
MAR44G.1_GM000077	{Scaffold1:85620:86129:-}	{WP_055673916.1; MmcB family DNA repair protein [Roseibium alexandrii]}	{NA}	{NA}	{WP.077293228.1; COG5321 Uncharacterized conserved protein S Function unknown ;}	{NA}	{NA}	{NA}	{NA}	{NA}	{NA}	{NA}	{false}	{NA}	{NA}
MAR44G.1_GM000078	{Scaffold1:86271:86759:+}	{WP_040451260.1; hypothetical protein [Roseibium alexandrii]}	{NA}	{NA}	{NA}	{NA}	{NA}	{NA}	{NA}	{NA}	{NA}	{NA}	{false}	{NA}	{NA}
MAR44G.1_GM000079	{Scaffold1:86785:88569:-}	{WP_055673918.1; sulfate permease [Roseibium alexandrii]}	{NA}	{labp:FJ695_02665; K03321 TC.SULP sulfate permease, SulP family -- --}	{WP.022999241.1; COG0659 Sulfate permease or related transporter, MFS superfamily P Inorganic ion transport and metabolism ;}	{NA}	{GO:0008272; sulfate transport; biological_process GO:0015116; sulfate transmembrane transporter activity; molecular_function GO:0016021; integral to membrane; cellular_component}	{NA}	{NA}	{NA}	{NA}	{NA}	{false}	{NA}	{PF00916:Sulfate permease family}
MAR44G.1_GM000080	{Scaffold1:88701:90377:-}	{WP_055673919.1; bifunctional protein tyrosine phosphatase family protein/NAD(P)/FAD-dependent oxidoreductase [Roseibium alexandrii]}	{Q54DK1; Sulfide:quinone oxidoreductase, mitochondrial }	{labp:FJ695_02660; K17218 sqr sulfide:quinone oxidoreductase 1.8.5.4 Metabolism; Energy metabolism; Sulfur metabolism [PATH:ko00920]}	{WP.022999240.1; COG3453 Predicted phosphohydrolase, protein tyrosine phosphatase (PTP) superfamily, DUF442 family R General function prediction only ;}	{NA}	{GO:0016117; carotenoid biosynthetic process; biological_process GO:0055114; oxidation-reduction process; biological_process GO:0016787; hydrolase activity; molecular_function GO:0016491; oxidoreductase activity; molecular_function GO:0016705; oxidoreductase activity, acting on paired donors, with incorporation or reduction of molecular oxygen; molecular_function}	{NA}	{NA}	{NA}	{NA}	{NA}	{false}	{NA}	{PF07992:Pyridine nucleotide-disulphide oxidoreductase PF05834:Lycopene cyclase protein PF01266:FAD dependent oxidoreductase PF04273:Putative phosphatase (DUF442)}
MAR44G.1_GM000081	{Scaffold1:90404:91297:-}	{WP_055673920.1; MBL fold metallo-hydrolase [Roseibium alexandrii]}	{Q3JRV4; Probable metallo-hydrolase BURPS1710b_2304 }	{NA}	{WP.022999239.1; COG0491 Glyoxylase or a related metal-dependent hydrolase, beta-lactamase superfamily II R General function prediction only ;}	{NA}	{GO:0016787; hydrolase activity; molecular_function}	{NA}	{NA}	{NA}	{NA}	{NA}	{false}	{NA}	{PF00753:Metallo-beta-lactamase superfamily}
MAR44G.1_GM000082	{Scaffold1:91336:91776:-}	{WP_082429252.1; permease [Roseibium alexandrii]}	{Q87AD3; UPF0394 membrane protein PD_1893 }	{labp:FJ695_02650; K07112 K07112 uncharacterized protein -- --}	{WP.012752928.1; COG2391 Uncharacterized membrane protein YedE/YeeE, contains two sulfur transport domains R General function prediction only ;}	{gnl|TC-DB|E7BBJ2; 9.B.102.5.5 DUF395-family membrane protein OS=Serratia sp. ATCC 39006 GN=pmpB PE=4 SV=1}	{NA}	{NA}	{NA}	{NA}	{NA}	{NA}	{false}	{NA}	{NA}
MAR44G.1_GM000083	{Scaffold1:91779:92207:-}	{WP_208981516.1; YeeE/YedE family protein [Roseibium alexandrii]}	{Q87AD4; UPF0394 membrane protein PD_1892 }	{labp:FJ695_02645; K07112 K07112 uncharacterized protein -- --}	{WP.062491080.1; COG2391 Uncharacterized membrane protein YedE/YeeE, contains two sulfur transport domains R General function prediction only ;}	{gnl|TC-DB|E7BBJ1; 9.B.102.5.2 DUF395-family membrane protein OS=Serratia sp. ATCC 39006 GN=pmpA PE=4 SV=1}	{NA}	{NA}	{NA}	{NA}	{NA}	{NA}	{false}	{NA}	{NA}
MAR44G.1_GM000084	{Scaffold1:92367:93416:+}	{WP_055673922.1; DUF1176 domain-containing protein [Roseibium alexandrii]}	{NA}	{NA}	{NA}	{NA}	{NA}	{NA}	{NA}	{NA}	{NA}	{YES}	{false}	{NA}	{NA}
MAR44G.1_GM000085	{Scaffold1:93418:95457:-}	{WP_055673923.1; bifunctional DedA family/phosphatase PAP2 family protein [Roseibium alexandrii]}	{NA}	{NA}	{WP.062491078.1; COG0671 Membrane-associated phospholipid phosphatase I Lipid transport and metabolism ;}	{NA}	{GO:0016020; membrane; cellular_component GO:0003824; NA}	{NA}	{NA}	{NA}	{NA}	{NA}	{false}	{NA}	{PF01569:PAP2 superfamily}
MAR44G.1_GM000086	{Scaffold1:95674:97140:+}	{WP_055673924.1; polyphosphate:AMP phosphotransferase [Roseibium alexandrii]}	{Q9HYF1; Polyphosphate:AMP phosphotransferase }	{labp:FJ695_02635; K23753 ppk2, pap AMP-polyphosphate phosphotransferase 2.7.4.33 --}	{WP.062491077.1; COG2326 Polyphosphate kinase 2, PPK2 family C Energy production and conversion ;}	{NA}	{NA}	{PHI:11746; A0A0H2ZE52 ppk2C (PA14_19410) 287 Pseudomonas aeruginosa opportunistic infection Caenorhabditis elegans (related: roundworm) Polyphosphate kinase Gene deletion: full; gene complementation reduced virulence}	{NA}	{NA}	{NA}	{NA}	{false}	{NA}	{NA}
MAR44G.1_GM000087	{Scaffold1:97191:98369:-}	{WP_055673925.1; aminotransferase class V-fold PLP-dependent enzyme [Roseibium alexandrii]}	{NA}	{labp:FJ695_02630; K00830 AGXT alanine-glyoxylate transaminase / serine-glyoxylate transaminase / serine-pyruvate transaminase [EC:2.6.1.44 2.6.1.45 2.6.1.51] 2.6.1.44,2.6.1.45,2.6.1.51 Metabolism; Carbohydrate metabolism; Glyoxylate and dicarboxylate metabolism [PATH:ko00630] Metabolism; Energy metabolism; Methane metabolism [PATH:ko00680] Metabolism; Amino acid metabolism; Alanine, aspartate an…	{WP.062492040.1; COG0075 Archaeal aspartate aminotransferase or a related aminotransferase, includes purine catabolism protein PucG EF Amino acid transport and metabolism ; Nucleotide transport and metabolism ;}	{NA}	{GO:0008152; NA}	{NA}	{NA}	{NA}	{NA}	{NA}	{false}	{NA}	{PF00266:Aminotransferase class-V}
MAR44G.1_GM000088	{Scaffold1:98741:99682:+}	{WP_055673926.1; N-formylglutamate amidohydrolase [Roseibium alexandrii]}	{NA}	{labp:FJ695_02625; K01458 hutG N-formylglutamate deformylase 3.5.1.68 Metabolism; Carbohydrate metabolism; Glyoxylate and dicarboxylate metabolism [PATH:ko00630] Metabolism; Amino acid metabolism; Histidine metabolism [PATH:ko00340]}	{WP.022999233.1; COG3741 N-formylglutamate amidohydrolase E Amino acid transport and metabolism ;}	{NA}	{NA}	{NA}	{NA}	{NA}	{NA}	{NA}	{false}	{NA}	{NA}
MAR44G.1_GM000089	{Scaffold1:99710:100891:-}	{WP_008196471.1; FAD-binding oxidoreductase [Roseibium alexandrii]}	{Q6DCP1; FAD-dependent oxidoreductase domain-containing protein 1 }	{labp:FJ695_02615; K18166 FOXRED1 FAD-dependent oxidoreductase domain-containing protein 1 -- --}	{WP.062491073.1; COG0665 Glycine/D-amino acid oxidase (deaminating) E Amino acid transport and metabolism ;}	{NA}	{GO:0016491; oxidoreductase activity; molecular_function GO:0055114; oxidation-reduction process; biological_process}	{NA}	{NA}	{NA}	{NA}	{NA}	{false}	{NA}	{PF07992:Pyridine nucleotide-disulphide oxidoreductase PF01266:FAD dependent oxidoreductase PF03435:Saccharopine dehydrogenase NADP binding domain}
MAR44G.1_GM000090	{Scaffold1:100945:102162:-}	{WP_082429253.1; acyl-CoA dehydrogenase [Roseibium alexandrii]}	{Q92947; Glutaryl-CoA dehydrogenase, mitochondrial }	{labp:FJ695_02610; K00252 GCDH, gcdH glutaryl-CoA dehydrogenase 1.3.8.6 Metabolism; Lipid metabolism; Fatty acid degradation [PATH:ko00071] Metabolism; Amino acid metabolism; Lysine degradation [PATH:ko00310] Metabolism; Amino acid metabolism; Tryptophan metabolism [PATH:ko00380] Metabolism; Xenobiotics biodegradation and metabolism; Benzoate degradation [PATH:ko00362]}	{WP.062491071.1; COG1960 Acyl-CoA dehydrogenase related to the alkylation response protein AidB I Lipid transport and metabolism ;}	{NA}	{GO:0055114; oxidation-reduction process; biological_process GO:0008152; NA GO:0016491; oxidoreductase activity; molecular_function GO:0003995; acyl-CoA dehydrogenase activity; molecular_function GO:0016627; oxidoreductase activity, acting on the CH-CH group of donors; molecular_function GO:0050660; flavin adenine dinucleotide binding; molecular_function}	{NA}	{NA}	{NA}	{NA}	{NA}	{false}	{NA}	{PF02770:Acyl-CoA dehydrogenase, middle domain PF00441:Acyl-CoA dehydrogenase, C-terminal domain PF08028:Acyl-CoA dehydrogenase, C-terminal domain PF02771:Acyl-CoA dehydrogenase, N-terminal domain}
MAR44G.1_GM000091	{Scaffold1:102330:103253:+}	{WP_008191628.1; LysR substrate-binding domain-containing protein [Roseibium alexandrii]}	{NA}	{labp:FJ695_02605; K03566 gcvA LysR family transcriptional regulator, glycine cleavage system transcriptional activator -- Cellular Processes; Cellular community - prokaryotes; Biofilm formation - Escherichia coli [PATH:ko02026]}	{WP.022999230.1; COG0583 DNA-binding transcriptional regulator, LysR family K Transcription ;}	{NA}	{GO:0006355; regulation of transcription, DNA-dependent; biological_process GO:0003700; sequence-specific DNA binding transcription factor activity; molecular_function}	{NA}	{NA}	{NA}	{ARO:3003665; NmcR 123.25 antibiotic inactivation enzyme, determinant of beta-lactam resistance, gene modulating beta-lactam resistance }	{NA}	{false}	{NA}	{PF00126:Bacterial regulatory helix-turn-helix protein, lysR family}
MAR44G.1_GM000092	{Scaffold1:103369:104190:+}	{WP_055673928.1; lipid kinase YegS [Roseibium alexandrii]}	{Q02PI7; Probable lipid kinase YegS-like }	{NA}	{WP.062491068.1; COG1597 Phosphatidylglycerol kinase, diacylglycerol kinase family IR Lipid transport and metabolism ; General function prediction only ;}	{NA}	{GO:0007205; activation of protein kinase C activity by G-protein coupled receptor protein signaling pathway; biological_process GO:0006741; NADP biosynthetic process; biological_process GO:0004143; diacylglycerol kinase activity; molecular_function GO:0003951; NAD+ kinase activity; molecular_function GO:0008152; NA}	{NA}	{NA}	{NA}	{NA}	{NA}	{false}	{NA}	{PF00781:Diacylglycerol kinase catalytic domain PF01513:ATP-NAD kinase}
MAR44G.1_GM000093	{Scaffold1:104498:106123:+}	{WP_055673929.1; long-chain fatty acid--CoA ligase [Roseibium alexandrii]}	{Q5LRT0; 3-methylmercaptopropionyl-CoA ligase }	{labp:FJ695_02595; K20034 dmdB 3-(methylthio)propionyl---CoA ligase 6.2.1.44 Metabolism; Energy metabolism; Sulfur metabolism [PATH:ko00920]}	{WP.077291216.1; COG0318 O-succinylbenzoic acid-CoA ligase MenE or related acyl-CoA synthetase (AMP-forming) I Lipid transport and metabolism ;}	{NA}	{GO:0008152; NA GO:0003824; NA}	{NA}	{NA}	{NA}	{NA}	{NA}	{false}	{NA}	{PF00501:AMP-binding enzyme}
MAR44G.1_GM000094	{Scaffold1:106120:106941:+}	{WP_055673930.1; SDR family oxidoreductase [Roseibium alexandrii]}	{Q9RPT1; Rhamnolipids biosynthesis 3-oxoacyl-[acyl-carrier-protein] reductase }	{NA}	{WP.077291215.1; COG1028 NAD(P)-dependent dehydrogenase, short-chain alcohol dehydrogenase family I Lipid transport and metabolism ;}	{NA}	{GO:0008152; NA GO:0050662; coenzyme binding; molecular_function GO:0016491; oxidoreductase activity; molecular_function GO:0044237; cellular metabolic process; biological_process GO:0003824; NA}	{NA}	{NA}	{NA}	{NA}	{NA}	{false}	{NA}	{PF01370:NAD dependent epimerase/dehydratase family PF00106:short chain dehydrogenase}
MAR44G.1_GM000095	{Scaffold1:106938:107426:+}	{WP_055673931.1; MaoC family dehydratase [Roseibium alexandrii]}	{P25200; Nodulation protein N }	{NA}	{WP.077291214.1; COG2030 Acyl-CoA dehydratase PaaZ I Lipid transport and metabolism ;}	{NA}	{GO:0008152; NA GO:0016491; oxidoreductase activity; molecular_function}	{NA}	{NA}	{NA}	{NA}	{NA}	{false}	{NA}	{PF01575:MaoC like domain}
MAR44G.1_GM000096	{Scaffold1:107464:108450:+}	{WP_055673932.1; nitronate monooxygenase family protein [Roseibium alexandrii]}	{NA}	{labp:FJ695_02580; K00459 ncd2, npd nitronate monooxygenase 1.13.12.16 Metabolism; Energy metabolism; Nitrogen metabolism [PATH:ko00910]}	{WP.055656990.1; COG2070 NAD(P)H-dependent flavin oxidoreductase YrpB, nitropropane dioxygenase family R General function prediction only ;}	{NA}	{GO:0018580; nitronate monooxygenase activity; molecular_function GO:0016491; oxidoreductase activity; molecular_function GO:0055114; oxidation-reduction process; biological_process}	{NA}	{NA}	{NA}	{NA}	{NA}	{false}	{NA}	{PF03060:Nitronate monooxygenase PF01070:FMN-dependent dehydrogenase}
MAR44G.1_GM000097	{Scaffold1:108461:109693:+}	{WP_008195739.1; acyl-CoA dehydrogenase family protein [Roseibium alexandrii]}	{B3DMA2; Acyl-CoA dehydrogenase family member 11 }	{labp:FJ695_02575; K00249 ACADM, acd acyl-CoA dehydrogenase 1.3.8.7 Metabolism; Lipid metabolism; Fatty acid degradation [PATH:ko00071] Metabolism; Amino acid metabolism; Valine, leucine and isoleucine degradation [PATH:ko00280] Organismal Systems; Endocrine system; PPAR signaling pathway [PATH:ko03320] Human Diseases; Endocrine and metabolic disease; Alcoholic liver disease [PATH:ko04936]}	{WP.077291213.1; COG1960 Acyl-CoA dehydrogenase related to the alkylation response protein AidB I Lipid transport and metabolism ;}	{NA}	{GO:0016491; oxidoreductase activity; molecular_function GO:0008152; NA GO:0055114; oxidation-reduction process; biological_process GO:0050660; flavin adenine dinucleotide binding; molecular_function GO:0016627; oxidoreductase activity, acting on the CH-CH group of donors; molecular_function GO:0003995; acyl-CoA dehydrogenase activity; molecular_function}	{NA}	{NA}	{NA}	{NA}	{NA}	{false}	{NA}	{PF08028:Acyl-CoA dehydrogenase, C-terminal domain PF00441:Acyl-CoA dehydrogenase, C-terminal domain PF02771:Acyl-CoA dehydrogenase, N-terminal domain PF02770:Acyl-CoA dehydrogenase, middle domain}
MAR44G.1_GM000098	{Scaffold1:109704:110729:+}	{WP_008190998.1; phosphotransferase family protein [Roseibium alexandrii]}	{Q80XL6; Acyl-CoA dehydrogenase family member 11 }	{NA}	{WP.077293227.1; COG3173 Predicted kinase, aminoglycoside phosphotransferase (APT) family R General function prediction only ;}	{NA}	{NA}	{NA}	{NA}	{NA}	{NA}	{NA}	{false}	{NA}	{NA}
MAR44G.1_GM000099	{Scaffold1:110722:111510:+}	{WP_008192829.1; SDR family oxidoreductase [Roseibium alexandrii]}	{NA}	{NA}	{WP.106751077.1; COG1028 NAD(P)-dependent dehydrogenase, short-chain alcohol dehydrogenase family I Lipid transport and metabolism ;}	{NA}	{GO:0044237; cellular metabolic process; biological_process GO:0003857; 3-hydroxyacyl-CoA dehydrogenase activity; molecular_function GO:0016616; oxidoreductase activity, acting on the CH-OH group of donors, NAD or NADP as acceptor; molecular_function GO:0008152; NA GO:0055114; oxidation-reduction process; biological_process GO:0009058; biosynthetic process; biological_process GO:0003824; NA GO:00…	{NA}	{NA}	{NA}	{NA}	{NA}	{false}	{NA}	{PF02719:Polysaccharide biosynthesis protein PF02737:3-hydroxyacyl-CoA dehydrogenase, NAD binding domain PF04321:RmlD substrate binding domain PF00056:lactate/malate dehydrogenase, NAD binding domain PF01370:NAD dependent epimerase/dehydratase family PF02826:D-isomer specific 2-hydroxyacid dehydrogenase, NAD binding domain PF00106:short chain dehydrogenase}
MAR44G.1_GM000100	{Scaffold1:111513:113624:-}	{WP_055673936.1; 3-hydroxyacyl-CoA dehydrogenase NAD-binding domain-containing protein [Roseibium alexandrii]}	{Q6NYL3; Peroxisomal bifunctional enzyme }	{labp:FJ695_02560; K07516 fadN 3-hydroxyacyl-CoA dehydrogenase 1.1.1.35 Metabolism; Carbohydrate metabolism; Butanoate metabolism [PATH:ko00650] Metabolism; Lipid metabolism; Fatty acid degradation [PATH:ko00071] Metabolism; Xenobiotics biodegradation and metabolism; Benzoate degradation [PATH:ko00362]}	{WP.077291211.1; COG1250 3-hydroxyacyl-CoA dehydrogenase I Lipid transport and metabolism ;}	{NA}	{GO:0006098; pentose-phosphate shunt; biological_process GO:0055114; oxidation-reduction process; biological_process GO:0008152; NA GO:0003857; 3-hydroxyacyl-CoA dehydrogenase activity; molecular_function GO:0004616; phosphogluconate dehydrogenase (decarboxylating) activity; molecular_function GO:0016491; oxidoreductase activity; molecular_function GO:0006631; fatty acid metabolic process; biolog…	{NA}	{NA}	{NA}	{NA}	{NA}	{false}	{NA}	{PF01266:FAD dependent oxidoreductase PF00725:3-hydroxyacyl-CoA dehydrogenase, C-terminal domain PF03446:NAD binding domain of 6-phosphogluconate dehydrogenase PF02737:3-hydroxyacyl-CoA dehydrogenase, NAD binding domain PF00378:Enoyl-CoA hydratase/isomerase}
MAR44G.1_GM000101	{Scaffold1:113713:114180:-}	{WP_055673937.1; tRNA (N6-threonylcarbamoyladenosine(37)-N6)-methyltransferase TrmO [Roseibium alexandrii]}	{Q6NDF6; S-adenosyl-L-methionine-binding protein RPA0152 }	{NA}	{WP.077291210.1; COG1720 tRNA (Thr-GGU) A37 N6-methylase J Translation, ribosomal structure and biogenesis ;}	{NA}	{NA}	{NA}	{NA}	{NA}	{NA}	{NA}	{false}	{NA}	{NA}
MAR44G.1_GM000102	{Scaffold1:114200:115090:-}	{CTQ77010.1; putative molybdopterin biosynthesis protein MoeA/LysR substrate binding-domain-containing protein [Roseibium alexandrii]}	{NA}	{labp:FJ695_02550; K07219 K07219 putative molybdopterin biosynthesis protein -- --}	{WP.077293226.1; COG1910 Periplasmic molybdate-binding protein/domain P Inorganic ion transport and metabolism ;}	{NA}	{GO:0005215; NA GO:0006810; transport; biological_process}	{NA}	{NA}	{NA}	{NA}	{NA}	{false}	{NA}	{PF00497:Bacterial extracellular solute-binding proteins, family 3}
MAR44G.1_GM000103	{Scaffold1:115138:115437:-}	{WP_055673939.1; hypothetical protein [Roseibium alexandrii]}	{NA}	{NA}	{NA}	{NA}	{NA}	{NA}	{NA}	{NA}	{NA}	{NA}	{false}	{NA}	{NA}
MAR44G.1_GM000104	{Scaffold1:115550:116701:+}	{WP_040452714.1; ABC transporter ATP-binding protein [Roseibium alexandrii]}	{Q1AS06; Spermidine/putrescine import ATP-binding protein PotA }	{labp:FJ695_02540; K02052 ABC.SP.A putative spermidine/putrescine transport system ATP-binding protein -- Cellular Processes; Cellular community - prokaryotes; Quorum sensing [PATH:ko02024]}	{WP.022999203.1; COG3842 ABC-type Fe3+/spermidine/putrescine transport systems, ATPase component E Amino acid transport and metabolism ;}	{gnl|TC-DB|Q1M7Q1; 3.A.1.11.6 Putative ABC transporter component OS=Rhizobium leguminosarum bv. viciae (strain 3841) GN=pRL100251 PE=3 SV=1}	{GO:0016820; hydrolase activity, acting on acid anhydrides, catalyzing transmembrane movement of substances; molecular_function GO:0006810; transport; biological_process GO:0016459; myosin complex; cellular_component GO:0043190; ATP-binding cassette (ABC) transporter complex; cellular_component GO:0005215; NA GO:0004055; argininosuccinate synthase activity; molecular_function GO:0016887; ATPase a…	{PHI:6319; Q8DPC2 potA 1313 Streptococcus pneumoniae pneumococcal pneumonia Mus musculus (related: house mouse) ABC transporter ATP-binding protein - spermidine/putrescine transport Gene mutation reduced virulence}	{VFG030675; VF0842 Trehalose-recycling ABC transporter (VF0842) - Nutritional/Metabolic factor sugC sn-glycerol-3-phosphate ABC transporter ATP-binding protein UgpC - - - -}	{NA}	{NA}	{NA}	{false}	{NA}	{PF08402:TOBE domain PF00005:ABC transporter PF00764:Arginosuccinate synthase PF02736:Myosin N-terminal SH3-like domain PF03459:TOBE domain}
MAR44G.1_GM000105	{Scaffold1:116784:117884:+}	{WP_008193479.1; extracellular solute-binding protein [Roseibium alexandrii]}	{NA}	{labp:FJ695_02535; K02055 ABC.SP.S putative spermidine/putrescine transport system substrate-binding protein -- Cellular Processes; Cellular community - prokaryotes; Quorum sensing [PATH:ko02024]}	{WP.022999202.1; COG0687 Spermidine/putrescine-binding periplasmic protein E Amino acid transport and metabolism ;}	{NA}	{NA}	{NA}	{NA}	{NA}	{NA}	{YES}	{false}	{NA}	{NA}
MAR44G.1_GM000106	{Scaffold1:117955:119220:+}	{WP_008190554.1; ABC transporter permease [Roseibium alexandrii]}	{NA}	{labp:FJ695_02530; K02054 ABC.SP.P1 putative spermidine/putrescine transport system permease protein -- Cellular Processes; Cellular community - prokaryotes; Quorum sensing [PATH:ko02024]}	{WP.022999201.1; COG1176 ABC-type spermidine/putrescine transport system, permease component I E Amino acid transport and metabolism ;}	{gnl|TC-DB|Q1M7Q3; 3.A.1.11.6 Putative spermidine/putrescine transport system ABC transporter permease protein OS=Rhizobium leguminosarum bv. viciae (strain 3841) GN=pRL100249 PE=3 SV=1}	{GO:0006810; transport; biological_process GO:0005215; NA GO:0016020; membrane; cellular_component}	{NA}	{NA}	{NA}	{NA}	{NA}	{false}	{NA}	{PF00528:Binding-protein-dependent transport system inner membrane component}
MAR44G.1_GM000107	{Scaffold1:119260:120084:+}	{WP_040451277.1; ABC transporter permease [Roseibium alexandrii]}	{NA}	{labp:FJ695_02525; K02053 ABC.SP.P putative spermidine/putrescine transport system permease protein -- Cellular Processes; Cellular community - prokaryotes; Quorum sensing [PATH:ko02024]}	{WP.031268731.1; COG1177 ABC-type spermidine/putrescine transport system, permease component II E Amino acid transport and metabolism ;}	{NA}	{GO:0006810; transport; biological_process GO:0005215; NA GO:0016020; membrane; cellular_component}	{NA}	{NA}	{NA}	{NA}	{NA}	{false}	{NA}	{PF00528:Binding-protein-dependent transport system inner membrane component}
MAR44G.1_GM000108	{Scaffold1:120180:120329:-}	{NA}	{NA}	{NA}	{NA}	{NA}	{NA}	{NA}	{NA}	{NA}	{NA}	{NA}	{false}	{NA}	{NA}
MAR44G.1_GM000109	{Scaffold1:120341:121570:+}	{WP_055673940.1; M24 family metallopeptidase [Roseibium alexandrii]}	{P38488; Creatinase }	{labp:FJ695_02520; K08688 E3.5.3.3 creatinase 3.5.3.3 Metabolism; Amino acid metabolism; Glycine, serine and threonine metabolism [PATH:ko00260] Metabolism; Amino acid metabolism; Arginine and proline metabolism [PATH:ko00330]}	{WP.077291209.1; COG0006 Xaa-Pro aminopeptidase E Amino acid transport and metabolism ;}	{NA}	{GO:0016787; hydrolase activity; molecular_function}	{NA}	{NA}	{NA}	{NA}	{NA}	{false}	{NA}	{PF01321:Creatinase/Prolidase N-terminal domain}
MAR44G.1_GM000110	{Scaffold1:121612:122358:+}	{EEE44578.1; Glutathione S-transferase [Roseibium alexandrii DFL-11]}	{NA}	{labp:FJ695_02515; K00799 GST, gst glutathione S-transferase 2.5.1.18 Metabolism; Metabolism of other amino acids; Glutathione metabolism [PATH:ko00480] Metabolism; Xenobiotics biodegradation and metabolism; Metabolism of xenobiotics by cytochrome P450 [PATH:ko00980] Metabolism; Xenobiotics biodegradation and metabolism; Drug metabolism - cytochrome P450 [PATH:ko00982] Metabolism; Xenobiotics bio…	{WP.095845785.1; COG0625 Glutathione S-transferase O Posttranslational modification, protein turnover, chaperones ;}	{NA}	{GO:0005515; protein binding; molecular_function}	{NA}	{NA}	{NA}	{NA}	{NA}	{true}	{NA}	{PF13417:Glutathione S-transferase, N-terminal domain PF02798:Glutathione S-transferase, N-terminal domain PF13409:Glutathione S-transferase, N-terminal domain}
MAR44G.1_GM000111	{Scaffold1:122522:123364:+}	{WP_055673941.1; fumarylacetoacetate hydrolase family protein [Roseibium alexandrii]}	{A9ALD1; Ureidoglycolate lyase }	{NA}	{WP.048529266.1; COG0179 2-keto-4-pentenoate hydratase/2-oxohepta-3-ene-1,7-dioic acid hydratase (catechol pathway) Q Secondary metabolites biosynthesis, transport and catabolism ;}	{NA}	{GO:0008152; NA GO:0003824; NA}	{NA}	{NA}	{NA}	{NA}	{NA}	{false}	{NA}	{PF01557:Fumarylacetoacetate (FAA) hydrolase family}
MAR44G.1_GM000112	{Scaffold1:123391:124515:-}	{WP_144432257.1; hypothetical protein [Roseibium alexandrii]}	{NA}	{NA}	{NA}	{NA}	{NA}	{NA}	{NA}	{NA}	{NA}	{NA}	{false}	{NA}	{NA}
MAR44G.1_GM000113	{Scaffold1:124515:125759:-}	{WP_055673943.1; glycosyltransferase [Roseibium alexandrii]}	{NA}	{labp:FJ695_02500; K16703 wcaL, amsK, cpsK colanic acid/amylovoran/stewartan biosynthesis glycosyltransferase WcaL/AmsK/CpsK 2.4.-.- Metabolism; Glycan biosynthesis and metabolism; Exopolysaccharide biosynthesis [PATH:ko00543]}	{WP.076630943.1; COG0438 Glycosyltransferase involved in cell wall bisynthesis M Cell wall/membrane/envelope biogenesis ;}	{NA}	{GO:0009058; biosynthetic process; biological_process}	{NA}	{NA}	{NA}	{NA}	{NA}	{false}	{BCH35590.1_; GT4 sucrose synthase (EC 2.4.1.13); sucrose-phosphate synthase (EC 2.4.1.14); alpha-glucosyltransferase (EC 2.4.1.52); lipopolysaccharide N-acetylglucosaminyltransferase (EC 2.4.1.56); phosphatidylinositol alpha-mannosyltransferase (EC 2.4.1.57); GDP-Man: Man1GlcNAc2-PP-dolichol alpha-1,3-mannosyltransferase (EC 2.4.1.132); GDP-Man: Man3GlcNAc2-PP-dolichol/Man4GlcNAc2-PP-dolichol al…	{PF00534:Glycosyl transferases group 1}
MAR44G.1_GM000114	{Scaffold1:125756:126427:-}	{WP_055673944.1; 4'-phosphopantetheinyl transferase superfamily protein [Roseibium alexandrii]}	{NA}	{NA}	{WP.081507583.1; COG2977 4'-phosphopantetheinyl transferase EntD (siderophore biosynthesis) Q Secondary metabolites biosynthesis, transport and catabolism ;}	{NA}	{GO:0008897; holo-[acyl-carrier-protein] synthase activity; molecular_function GO:0000287; magnesium ion binding; molecular_function GO:0009059; macromolecule biosynthetic process; biological_process}	{NA}	{NA}	{NA}	{NA}	{NA}	{false}	{NA}	{PF01648:4'-phosphopantetheinyl transferase superfamily}
MAR44G.1_GM000115	{Scaffold1:126438:131081:-}	{WP_008194142.1; LLM class flavin-dependent oxidoreductase [Roseibium alexandrii]}	{NA}	{NA}	{WP.051909656.1; COG2141 Flavin-dependent oxidoreductase, luciferase family (includes alkanesulfonate monooxygenase SsuD and methylene tetrahydromethanopterin reductase) HR Coenzyme transport and metabolism ; General function prediction only ;}	{NA}	{GO:0003824; NA GO:0009058; biosynthetic process; biological_process GO:0016742; hydroxymethyl-, formyl- and related transferase activity; molecular_function GO:0055114; oxidation-reduction process; biological_process GO:0016705; oxidoreductase activity, acting on paired donors, with incorporation or reduction of molecular oxygen; molecular_function GO:0008152; NA}	{NA}	{NA}	{NA}	{NA}	{NA}	{false}	{NA}	{PF02911:Formyl transferase, C-terminal domain PF00551:Formyl transferase PF00501:AMP-binding enzyme PF00296:Luciferase-like monooxygenase}
MAR44G.1_GM000116	{Scaffold1:131420:137848:+}	{WP_055673885.1; type I polyketide synthase [Roseibium alexandrii]}	{Q7TXL6; Phenolphthiocerol/phthiocerol polyketide synthase subunit E }	{NA}	{WP.038590362.1; COG3321 Acyl transferase domain in polyketide synthase (PKS) enzymes Q Secondary metabolites biosynthesis, transport and catabolism ;}	{NA}	{GO:0006886; intracellular protein transport; biological_process GO:0008152; NA GO:0055114; oxidation-reduction process; biological_process GO:0050660; flavin adenine dinucleotide binding; molecular_function GO:0006505; GPI anchor metabolic process; biological_process GO:0016788; hydrolase activity, acting on ester bonds; molecular_function GO:0016491; oxidoreductase activity; molecular_function …	{PHI:3090; V9W6M6 pamA 1464 Paenibacillus larvae american foulbrood Apis mellifera (related: honey bee) "encodes paenilamicin, a secondary metabolite antibiotic" Gene disruption reduced virulence}	{VFG022433; VF0309 PDIM ppsE acyltransferase domain-containing protein Major lipid, also referred as ball of wax; mas (mycocerosic acid synthase catalyzing the synthesis of long-chain, multiply methylated branched fatty acid, called mycocerosic acid), fadD26 and fadD28 (long-chain fatty acyl-AMP ligases) are essential for the biosynthesis of PDIM; drrC and mmpL7 gene are necessary for the proper …	{NA}	{NA}	{NA}	{false}	{NA}	{PF00108:Thiolase, N-terminal domain PF07819:PGAP1-like protein PF00106:short chain dehydrogenase PF00975:Thioesterase domain PF00070:Pyridine nucleotide-disulphide oxidoreductase}
MAR44G.1_GM000117	{Scaffold1:137892:139205:-}	{WP_055673889.1; glycosyltransferase [Roseibium alexandrii]}	{NA}	{NA}	{WP.011749891.1; COG0438 Glycosyltransferase involved in cell wall bisynthesis M Cell wall/membrane/envelope biogenesis ;}	{NA}	{GO:0009058; biosynthetic process; biological_process}	{NA}	{NA}	{NA}	{NA}	{NA}	{false}	{QDG74823.1_; GT4 sucrose synthase (EC 2.4.1.13); sucrose-phosphate synthase (EC 2.4.1.14); alpha-glucosyltransferase (EC 2.4.1.52); lipopolysaccharide N-acetylglucosaminyltransferase (EC 2.4.1.56); phosphatidylinositol alpha-mannosyltransferase (EC 2.4.1.57); GDP-Man: Man1GlcNAc2-PP-dolichol alpha-1,3-mannosyltransferase (EC 2.4.1.132); GDP-Man: Man3GlcNAc2-PP-dolichol/Man4GlcNAc2-PP-dolichol al…	{PF00534:Glycosyl transferases group 1}
MAR44G.1_GM000118	{Scaffold1:139268:140068:-}	{WP_082429248.1; WecB/TagA/CpsF family glycosyltransferase [Roseibium alexandrii]}	{NA}	{labp:FJ695_02475; K05946 tagA, tarA N-acetylglucosaminyldiphosphoundecaprenol N-acetyl-beta-D-mannosaminyltransferase 2.4.1.187 Metabolism; Glycan biosynthesis and metabolism; Teichoic acid biosynthesis [PATH:ko00552]}	{WP.066962242.1; COG1922 UDP-N-acetyl-D-mannosaminuronic acid transferase, WecB/TagA/CpsF family M Cell wall/membrane/envelope biogenesis ;}	{NA}	{GO:0009058; biosynthetic process; biological_process}	{NA}	{NA}	{NA}	{NA}	{NA}	{false}	{QDG74822.1_; GT26 UDP-ManNAcA: beta-N-acetyl mannosaminuronyltransferase (EC 2.4.1.-); UDP-ManNAc: beta-N-acetyl-mannosaminyltransferase (EC 2.4.1.-); UDP-Glc: beta-1,4-glucosyltransferase (EC 2.4.1.-); UDP-Gal: beta-1,4-galactosyltransferase (EC 2.4.1.-) }	{PF03808:Glycosyl transferase WecB/TagA/CpsF family}
MAR44G.1_GM000119	{Scaffold1:140081:140200:+}	{NA}	{NA}	{NA}	{NA}	{NA}	{NA}	{NA}	{NA}	{NA}	{NA}	{NA}	{false}	{NA}	{NA}
MAR44G.1_GM000120	{Scaffold1:140400:141755:+}	{CTQ76765.1; Teichuronic acid biosynthesis protein TuaB [Roseibium alexandrii]}	{NA}	{NA}	{NA}	{NA}	{GO:0000271; polysaccharide biosynthetic process; biological_process GO:0016020; membrane; cellular_component}	{NA}	{NA}	{NA}	{NA}	{NA}	{false}	{NA}	{PF01943:Polysaccharide biosynthesis protein}
MAR44G.1_GM000121	{Scaffold1:141775:142743:+}	{WP_055673882.1; glycosyltransferase [Roseibium alexandrii]}	{NA}	{NA}	{WP.080724974.1; COG1215 Glycosyltransferase, catalytic subunit of cellulose synthase and poly-beta-1,6-N-acetylglucosamine synthase N Cell motility ;}	{NA}	{NA}	{NA}	{NA}	{NA}	{NA}	{NA}	{false}	{QDG74820.1_; GT2 cellulose synthase (EC 2.4.1.12); chitin synthase (EC 2.4.1.16); dolichyl-phosphate beta-D-mannosyltransferase (EC 2.4.1.83); dolichyl-phosphate beta-glucosyltransferase (EC 2.4.1.117); N-acetylglucosaminyltransferase (EC 2.4.1.-); N-acetylgalactosaminyltransferase (EC 2.4.1.-); hyaluronan synthase (EC 2.4.1.212); chitin oligosaccharide synthase (EC 2.4.1.-); beta-1,3-glucan syn…	{NA}
MAR44G.1_GM000122	{Scaffold1:143092:143649:-}	{WP_144432254.1; hypothetical protein [Roseibium alexandrii]}	{NA}	{NA}	{NA}	{NA}	{NA}	{NA}	{NA}	{NA}	{NA}	{NA}	{false}	{NA}	{NA}
MAR44G.1_GM000123	{Scaffold1:143938:145170:-}	{WP_208981510.1; glycosyltransferase family 4 protein [Roseibium alexandrii]}	{NA}	{NA}	{WP.066970031.1; COG0438 Glycosyltransferase involved in cell wall bisynthesis M Cell wall/membrane/envelope biogenesis ;}	{NA}	{GO:0009058; biosynthetic process; biological_process}	{NA}	{NA}	{NA}	{NA}	{NA}	{false}	{QDG79423.1_; GT4 sucrose synthase (EC 2.4.1.13); sucrose-phosphate synthase (EC 2.4.1.14); alpha-glucosyltransferase (EC 2.4.1.52); lipopolysaccharide N-acetylglucosaminyltransferase (EC 2.4.1.56); phosphatidylinositol alpha-mannosyltransferase (EC 2.4.1.57); GDP-Man: Man1GlcNAc2-PP-dolichol alpha-1,3-mannosyltransferase (EC 2.4.1.132); GDP-Man: Man3GlcNAc2-PP-dolichol/Man4GlcNAc2-PP-dolichol al…	{PF00534:Glycosyl transferases group 1}
MAR44G.1_GM000124	{Scaffold1:145194:146687:-}	{CTQ76753.1; Tyrosine-protein kinase ptk [Roseibium alexandrii]}	{NA}	{labp:FJ695_02450; K16554 exoP, vpsO polysaccharide biosynthesis transport protein 2.7.10.3 Cellular Processes; Cellular community - prokaryotes; Biofilm formation - Vibrio cholerae [PATH:ko05111]}	{NA}	{NA}	{GO:0016020; membrane; cellular_component GO:0009103; lipopolysaccharide biosynthetic process; biological_process}	{NA}	{NA}	{NA}	{NA}	{NA}	{false}	{NA}	{PF02706:Chain length determinant protein}
MAR44G.1_GM000125	{Scaffold1:146772:147989:-}	{WP_082429247.1; polysaccharide biosynthesis/export family protein [Roseibium alexandrii]}	{NA}	{labp:FJ695_02445; K16552 exoF polysaccharide biosynthesis/export protein ExoF -- --}	{NA}	{NA}	{GO:0015774; polysaccharide transport; biological_process GO:0015159; polysaccharide transmembrane transporter activity; molecular_function GO:0016020; membrane; cellular_component GO:0019028; viral capsid; cellular_component GO:0010508; positive regulation of autophagy; biological_process}	{NA}	{NA}	{NA}	{NA}	{NA}	{false}	{NA}	{PF10186:Vacuolar sorting 38 and autophagy-related subunit 14 PF05531:Nucleopolyhedrovirus P10 protein PF02563:Polysaccharide biosynthesis/export protein}
MAR44G.1_GM000126	{Scaffold1:148257:149624:-}	{WP_055673877.1; hypothetical protein [Roseibium alexandrii]}	{NA}	{NA}	{NA}	{NA}	{NA}	{NA}	{NA}	{NA}	{NA}	{NA}	{false}	{NA}	{NA}
MAR44G.1_GM000127	{Scaffold1:149711:152473:+}	{WP_055673876.1; glycoside hydrolase family 9 protein [Roseibium alexandrii]}	{NA}	{labp:FJ695_02435; K01179 E3.2.1.4 endoglucanase 3.2.1.4 Metabolism; Carbohydrate metabolism; Starch and sucrose metabolism [PATH:ko00500] Environmental Information Processing; Signal transduction; Two-component system [PATH:ko02020]}	{NA}	{NA}	{GO:0004553; hydrolase activity, hydrolyzing O-glycosyl compounds; molecular_function GO:0005975; carbohydrate metabolic process; biological_process GO:0008810; cellulase activity; molecular_function}	{NA}	{NA}	{NA}	{NA}	{NA}	{false}	{QDG74815.1_; GH9 endoglucanase (EC 3.2.1.4); endo-beta-1,3(4)-glucanase / lichenase-laminarinase (EC 3.2.1.6); lichenase / endo-beta-1,3-1,4-glucanase (EC 3.2.1.73); exo-beta-1,4-glucanase / cellodextrinase (EC 3.2.1.74); cellobiohydrolase (EC 3.2.1.91); xyloglucan-specific endo-beta-1,4-glucanase / endo-xyloglucanase (EC 3.2.1.151); exo-beta-glucosaminidase (EC 3.2.1.165); endo-beta-1,4-glucana…	{PF00759:Glycosyl hydrolase family 9 PF02927:Cellulase N-terminal ig-like domain}
MAR44G.1_GM000128	{Scaffold1:152603:153829:+}	{WP_055673875.1; glycosyltransferase family 2 protein [Roseibium alexandrii]}	{NA}	{NA}	{WP.013233987.1; COG1215 Glycosyltransferase, catalytic subunit of cellulose synthase and poly-beta-1,6-N-acetylglucosamine synthase N Cell motility ;}	{NA}	{GO:0016757; transferase activity, transferring glycosyl groups; molecular_function GO:0016020; membrane; cellular_component}	{NA}	{NA}	{NA}	{NA}	{NA}	{false}	{QDG74814.1_; GT2 cellulose synthase (EC 2.4.1.12); chitin synthase (EC 2.4.1.16); dolichyl-phosphate beta-D-mannosyltransferase (EC 2.4.1.83); dolichyl-phosphate beta-glucosyltransferase (EC 2.4.1.117); N-acetylglucosaminyltransferase (EC 2.4.1.-); N-acetylgalactosaminyltransferase (EC 2.4.1.-); hyaluronan synthase (EC 2.4.1.212); chitin oligosaccharide synthase (EC 2.4.1.-); beta-1,3-glucan syn…	{PF01169:Uncharacterized protein family UPF0016 PF13506:Glycosyl transferase family 21}
MAR44G.1_GM000129	{Scaffold1:154245:155798:+}	{WP_055672318.1; cryptochrome/photolyase family protein [Roseibium alexandrii]}	{A9CH39; (6-4) photolyase }	{lagg:B0E33_09740; K06876 phrB (6-4)DNA photolyase 4.1.99.13 --}	{WP.077291062.1; COG3046 Uncharacterized conserved protein related to deoxyribodipyrimidine photolyase R General function prediction only ;}	{NA}	{NA}	{NA}	{NA}	{NA}	{NA}	{NA}	{false}	{NA}	{NA}
MAR44G.1_GM000130	{Scaffold1:156159:156596:-}	{WP_050776024.1; septal ring lytic transglycosylase RlpA family protein [Roseibium alexandrii]}	{Q9JSM7; Endolytic peptidoglycan transglycosylase RlpA }	{labp:FJ695_02345; K03642 rlpA rare lipoprotein A -- --}	{WP.075281742.1; COG0797 Peptidoglycan lytic transglycosylase RlpA, contains C-terminal SPOR domain M Cell wall/membrane/envelope biogenesis ;}	{NA}	{GO:0000917; barrier septum formation; biological_process}	{PHI:5448; Q9HVT6 PA4485 287 Pseudomonas aeruginosa nosocomial infection Mus musculus (related: house mouse) Cell envelope protein Gene mutation unaffected pathogenicity}	{NA}	{NA}	{NA}	{NA}	{false}	{UZX15150.1_; CBM50 Modules of approx. 50 residues found attached to various enzymes from families GH18, GH19, GH23, GH24, GH25 and GH73, i.e. enzymes cleaving either chitin or peptidoglycan. Binding to chitopentaose demonstrated in the case of Pteris ryukyuensis chitinase A [Ohnuma T et al. (2008) J. Biol. Chem. 283:5178-87 (PMID: 18083709)]. CBM50 modules are also found in a multitude of other …	{PF04472:Protein of unknown function (DUF552)}
MAR44G.1_GM000131	{Scaffold1:156916:158973:+}	{WP_209002630.1; EAL domain-containing protein [Roseibium alexandrii]}	{NA}	{NA}	{WP.077291061.1; COG5001 Cyclic di-GMP metabolism protein, combines GGDEF and EAL domains with a 6TM membrane domain T Signal transduction mechanisms ;}	{NA}	{NA}	{NA}	{NA}	{NA}	{NA}	{NA}	{false}	{NA}	{NA}
MAR44G.1_GM000132	{Scaffold1:159043:161505:-}	{CTQ71271.1; DNA gyrase subunit B [Roseibium alexandrii]}	{P0CAX1; DNA gyrase subunit B }	{labp:FJ695_02335; K02470 gyrB DNA gyrase subunit B 5.6.2.2 --}	{WP.055657055.1; COG0187 DNA gyrase/topoisomerase IV, subunit B L Replication, recombination and repair ;}	{NA}	{GO:0006265; DNA topological change; biological_process GO:0005524; ATP binding; molecular_function GO:0003677; DNA binding; molecular_function GO:0003918; DNA topoisomerase (ATP-hydrolyzing) activity; molecular_function}	{NA}	{NA}	{NA}	{ARO:3003316, ARO:3003318; Escherichia coli parE conferring resistance to fluoroquinolones, Streptomyces rishiriensis parY mutant conferring resistance to aminocoumarin 386.726, 402.905 antibiotic resistant gene variant or mutant, determinant of aminocoumarin resistance, determinant of fluoroquinolone resistance, gene involved in self-resistance to antibiotic }	{NA}	{false}	{NA}	{PF00204:DNA gyrase B PF02518:Histidine kinase-, DNA gyrase B-, and HSP90-like ATPase PF00986:DNA gyrase B subunit, carboxyl terminus}
MAR44G.1_GM000133	{Scaffold1:161619:162776:-}	{WP_008195059.1; DNA replication/repair protein RecF [Roseibium alexandrii]}	{Q98BH1; DNA replication and repair protein RecF }	{labp:FJ695_02330; K03629 recF DNA replication and repair protein RecF -- Genetic Information Processing; Replication and repair; Homologous recombination [PATH:ko03440]}	{WP.077291060.1; COG1195 Recombinational DNA repair ATPase RecF L Replication, recombination and repair ;}	{NA}	{GO:0005524; ATP binding; molecular_function GO:0016887; ATPase activity; molecular_function}	{NA}	{NA}	{NA}	{NA}	{NA}	{false}	{NA}	{PF00005:ABC transporter}
MAR44G.1_GM000134	{Scaffold1:162798:163916:-}	{WP_055672321.1; DNA polymerase III subunit beta [Roseibium alexandrii]}	{P0CAU5; Beta sliding clamp }	{labp:FJ695_02325; K02338 dnaN DNA polymerase III subunit beta 2.7.7.7 Genetic Information Processing; Replication and repair; DNA replication [PATH:ko03030] Genetic Information Processing; Replication and repair; Mismatch repair [PATH:ko03430] Genetic Information Processing; Replication and repair; Homologous recombination [PATH:ko03440]}	{WP.077291059.1; COG0592 DNA polymerase III sliding clamp (beta) subunit, PCNA homolog L Replication, recombination and repair ;}	{NA}	{GO:0006260; DNA replication; biological_process GO:0003887; DNA-directed DNA polymerase activity; molecular_function GO:0008408; 3'-5' exonuclease activity; molecular_function GO:0003677; DNA binding; molecular_function GO:0009360; DNA polymerase III complex; cellular_component}	{NA}	{NA}	{NA}	{NA}	{NA}	{false}	{NA}	{PF00712:DNA polymerase III beta subunit, N-terminal domain PF02768:DNA polymerase III beta subunit, C-terminal domain PF02767:DNA polymerase III beta subunit, central domain}
MAR44G.1_GM000135	{Scaffold1:164087:165565:-}	{WP_055672322.1; chromosomal replication initiator protein DnaA [Roseibium alexandrii]}	{Q89W63; Chromosomal replication initiator protein DnaA }	{labp:FJ695_02320; K02313 dnaA chromosomal replication initiator protein -- Environmental Information Processing; Signal transduction; Two-component system [PATH:ko02020] Cellular Processes; Cell growth and death; Cell cycle - Caulobacter [PATH:ko04112]}	{WP.077291058.1; COG0593 Chromosomal replication initiation ATPase DnaA L Replication, recombination and repair ;}	{NA}	{GO:0006508; proteolysis; biological_process GO:0031683; G-protein beta/gamma-subunit complex binding; molecular_function GO:0005524; ATP binding; molecular_function GO:0006270; DNA-dependent DNA replication initiation; biological_process GO:0007186; G-protein coupled receptor protein signaling pathway; biological_process GO:0006275; regulation of DNA replication; biological_process GO:0043565; s…	{NA}	{NA}	{NA}	{NA}	{NA}	{false}	{NA}	{PF01637:ATPase domain predominantly from Archaea PF08299:Bacterial dnaA protein helix-turn-helix PF03577:Peptidase family C69 PF00503:G-protein alpha subunit PF00004:ATPase family associated with various cellular activities (AAA) PF01695:IstB-like ATP binding protein PF02367:Threonylcarbamoyl adenosine biosynthesis protein TsaE}
MAR44G.1_GM000136	{Scaffold1:165722:166177:-}	{OJJ12641.1; sulfurtransferase [Alphaproteobacteria bacterium AO1-B]}	{P0A3K2; Uncharacterized protein RC0915 }	{NA}	{WP.077293214.1; COG0607 Rhodanese-related sulfurtransferase P Inorganic ion transport and metabolism ;}	{NA}	{NA}	{NA}	{NA}	{NA}	{NA}	{NA}	{false}	{NA}	{NA}
MAR44G.1_GM000137	{Scaffold1:166809:167075:-}	{WP_040451298.1; 30S ribosomal protein S20 [Roseibium alexandrii]}	{C3MCY9; 30S ribosomal protein S20 }	{labp:FJ695_02310; K02968 RP-S20, rpsT small subunit ribosomal protein S20 -- Genetic Information Processing; Translation; Ribosome [PATH:ko03010]}	{WP.022999146.1; COG0268 Ribosomal protein S20 J Translation, ribosomal structure and biogenesis ;}	{NA}	{GO:0005737; cytoplasm; cellular_component GO:0006309; DNA fragmentation involved in apoptotic nuclear change; biological_process GO:0005622; intracellular; cellular_component GO:0003735; structural constituent of ribosome; molecular_function GO:0016787; hydrolase activity; molecular_function GO:0006412; translation; biological_process GO:0003723; RNA binding; molecular_function GO:0005840; ribos…	{NA}	{NA}	{NA}	{NA}	{NA}	{false}	{NA}	{PF01649:Ribosomal protein S20 PF09230:DNA fragmentation factor 40 kDa}
MAR44G.1_GM000138	{Scaffold1:167252:168025:-}	{WP_008193734.1; enoyl-CoA hydratase [Roseibium alexandrii]}	{Q52995; Probable enoyl-CoA hydratase }	{labp:FJ695_02305; K01692 paaF, echA enoyl-CoA hydratase 4.2.1.17 Metabolism; Carbohydrate metabolism; Propanoate metabolism [PATH:ko00640] Metabolism; Carbohydrate metabolism; Butanoate metabolism [PATH:ko00650] Metabolism; Lipid metabolism; Fatty acid degradation [PATH:ko00071] Metabolism; Amino acid metabolism; Valine, leucine and isoleucine degradation [PATH:ko00280] Metabolism; Amino acid me…	{WP.022999145.1; COG1024 Enoyl-CoA hydratase/carnithine racemase I Lipid transport and metabolism ;}	{NA}	{GO:0006508; proteolysis; biological_process GO:0008152; NA GO:0008233; peptidase activity; molecular_function GO:0005743; mitochondrial inner membrane; cellular_component GO:0003824; NA GO:0004129; cytochrome-c oxidase activity; molecular_function}	{PHI:9517; I1S8D3 FgEch1 (FGSG_13111) 5518 Fusarium graminearum fusarium head blight Triticum aestivum (related: bread wheat) Enoyl-CoA hydratase Gene deletion: full; gene complementation reduced virulence}	{NA}	{NA}	{NA}	{NA}	{false}	{NA}	{PF02284:Cytochrome c oxidase subunit Va PF01343:Peptidase family S49 PF00378:Enoyl-CoA hydratase/isomerase}
MAR44G.1_GM000139	{Scaffold1:168126:169019:-}	{WP_055672324.1; bifunctional DNA-formamidopyrimidine glycosylase/DNA-(apurinic or apyrimidinic site) lyase [Roseibium alexandrii]}	{Q2KDA9; Formamidopyrimidine-DNA glycosylase }	{labp:FJ695_02300; K10563 mutM, fpg formamidopyrimidine-DNA glycosylase [EC:3.2.2.23 4.2.99.18] 3.2.2.23,4.2.99.18 Genetic Information Processing; Replication and repair; Base excision repair [PATH:ko03410]}	{WP.077291057.1; COG0266 Formamidopyrimidine-DNA glycosylase L Replication, recombination and repair ;}	{NA}	{GO:0006284; base-excision repair; biological_process GO:0008270; zinc ion binding; molecular_function GO:0006289; nucleotide-excision repair; biological_process GO:0003684; damaged DNA binding; molecular_function GO:0003824; NA GO:0003906; DNA-(apurinic or apyrimidinic site) lyase activity; molecular_function GO:0016799; hydrolase activity, hydrolyzing N-glycosyl compounds; molecular_function}	{NA}	{NA}	{NA}	{NA}	{NA}	{false}	{NA}	{PF06831:Formamidopyrimidine-DNA glycosylase H2TH domain PF01149:Formamidopyrimidine-DNA glycosylase N-terminal domain PF06827:Zinc finger found in FPG and IleRS}
MAR44G.1_GM000140	{Scaffold1:169142:169954:+}	{WP_050776179.1; bifunctional demethylmenaquinone methyltransferase/2-methoxy-6-polyprenyl-1,4-benzoquinol methylase UbiE [Roseibium alexandrii]}	{Q98GV1; Ubiquinone/menaquinone biosynthesis C-methyltransferase UbiE }	{labp:FJ695_02295; K03183 ubiE demethylmenaquinone methyltransferase / 2-methoxy-6-polyprenyl-1,4-benzoquinol methylase [EC:2.1.1.163 2.1.1.201] 2.1.1.163,2.1.1.201 Metabolism; Metabolism of cofactors and vitamins; Ubiquinone and other terpenoid-quinone biosynthesis [PATH:ko00130]}	{NA}	{NA}	{GO:0008168; methyltransferase activity; molecular_function GO:0008152; NA}	{NA}	{NA}	{NA}	{NA}	{NA}	{true}	{NA}	{PF01209:ubiE/COQ5 methyltransferase family PF08241:Methyltransferase domain PF05148:Hypothetical methyltransferase}
MAR44G.1_GM000141	{Scaffold1:169958:171541:+}	{WP_008193109.1; 2-polyprenylphenol 6-hydroxylase [Roseibium alexandrii]}	{Q7NZD1; Probable protein kinase UbiB }	{labp:FJ695_02290; K03688 ubiB, aarF ubiquinone biosynthesis protein -- --}	{WP.077291055.1; COG0661 Predicted protein kinase regulating ubiquinone biosynthesis, AarF/ABC1/UbiB family HT Coenzyme transport and metabolism ; Signal transduction mechanisms ;}	{NA}	{GO:0004672; protein kinase activity; molecular_function GO:0005524; ATP binding; molecular_function GO:0003824; NA GO:0006468; protein phosphorylation; biological_process}	{NA}	{NA}	{NA}	{NA}	{NA}	{false}	{NA}	{PF00069:Protein kinase domain PF01163:RIO1 family}
MAR44G.1_GM000142	{Scaffold1:171639:172715:+}	{WP_082429078.1; alcohol dehydrogenase family protein [Roseibium alexandrii]}	{NA}	{NA}	{WP.127748555.1; COG0604 NADPH:quinone reductase or related Zn-dependent oxidoreductase CR Energy production and conversion ; General function prediction only ;}	{NA}	{GO:0008839; dihydrodipicolinate reductase activity; molecular_function GO:0009089; lysine biosynthetic process via diaminopimelate; biological_process GO:0045226; extracellular polysaccharide biosynthetic process; biological_process GO:0008270; zinc ion binding; molecular_function GO:0006520; cellular amino acid metabolic process; biological_process GO:0008831; dTDP-4-dehydrorhamnose reductase a…	{NA}	{NA}	{NA}	{NA}	{NA}	{false}	{NA}	{PF00107:Zinc-binding dehydrogenase PF04321:RmlD substrate binding domain PF08240:Alcohol dehydrogenase GroES-like domain PF00208:Glutamate/Leucine/Phenylalanine/Valine dehydrogenase PF01370:NAD dependent epimerase/dehydratase family PF01113:Dihydrodipicolinate reductase, N-terminus PF00106:short chain dehydrogenase}
MAR44G.1_GM000143	{Scaffold1:172735:173379:-}	{WP_055672326.1; GntR family transcriptional regulator [Roseibium alexandrii]}	{NA}	{NA}	{WP.077291054.1; COG1802 DNA-binding transcriptional regulator, GntR family K Transcription ;}	{NA}	{GO:0006352; transcription initiation, DNA-dependent; biological_process GO:0006355; regulation of transcription, DNA-dependent; biological_process GO:0003700; sequence-specific DNA binding transcription factor activity; molecular_function GO:0003677; DNA binding; molecular_function GO:0016987; sigma factor activity; molecular_function}	{NA}	{NA}	{NA}	{NA}	{NA}	{false}	{NA}	{PF04545:Sigma-70, region 4 PF00392:Bacterial regulatory proteins, gntR family}
MAR44G.1_GM000144	{Scaffold1:173468:173938:+}	{WP_040451302.1; OsmC family protein [Roseibium alexandrii]}	{NA}	{NA}	{WP.077291053.1; COG1764 Organic hydroperoxide reductase OsmC/OhrA V Defense mechanisms ;}	{NA}	{GO:0006950; response to stress; biological_process}	{NA}	{NA}	{NA}	{NA}	{NA}	{true}	{NA}	{PF02566:OsmC-like protein}
MAR44G.1_GM000145	{Scaffold1:173942:174565:-}	{WP_055672328.1; alpha-ketoglutarate-dependent dioxygenase AlkB [Roseibium alexandrii]}	{P0CAT7; Alpha-ketoglutarate-dependent dioxygenase AlkB homolog }	{labt:FIU93_04050; K03919 alkB DNA oxidative demethylase 1.14.11.33 --}	{WP.077293213.1; COG3145 Alkylated DNA repair dioxygenase AlkB L Replication, recombination and repair ;}	{NA}	{NA}	{NA}	{NA}	{NA}	{NA}	{NA}	{false}	{BCH13517.1_; CBM50 Modules of approx. 50 residues found attached to various enzymes from families GH18, GH19, GH23, GH24, GH25 and GH73, i.e. enzymes cleaving either chitin or peptidoglycan. Binding to chitopentaose demonstrated in the case of Pteris ryukyuensis chitinase A [Ohnuma T et al. (2008) J. Biol. Chem. 283:5178-87 (PMID: 18083709)]. CBM50 modules are also found in a multitude of other …	{NA}
MAR44G.1_GM000146	{Scaffold1:174589:175563:-}	{WP_208981346.1; hypothetical protein [Roseibium alexandrii]}	{NA}	{NA}	{WP.077291051.1; COG4278 Uncharacterized conserved protein S Function unknown ;}	{NA}	{GO:0016020; membrane; cellular_component}	{NA}	{NA}	{NA}	{NA}	{NA}	{false}	{NA}	{PF02687:FtsX-like permease family}
MAR44G.1_GM000147	{Scaffold1:175643:177664:+}	{WP_055672330.1; molecular chaperone DnaK [Roseibium alexandrii]}	{Q11KJ6; Chaperone protein DnaK }	{labp:FJ695_02250; K04043 dnaK, HSPA9 molecular chaperone DnaK -- Genetic Information Processing; Folding, sorting and degradation; RNA degradation [PATH:ko03018] Organismal Systems; Aging; Longevity regulating pathway - worm [PATH:ko04212] Human Diseases; Infectious disease: bacterial; Tuberculosis [PATH:ko05152]}	{WP.022999135.1; COG0443 Molecular chaperone DnaK (HSP70) O Posttranslational modification, protein turnover, chaperones ;}	{gnl|TC-DB|P0A6Y8; 1.A.33.1.2 Chaperone protein dnaK - Escherichia coli.}	{GO:0005975; carbohydrate metabolic process; biological_process GO:0016773; phosphotransferase activity, alcohol group as acceptor; molecular_function GO:0000902; cell morphogenesis; biological_process}	{NA}	{VFG043573; VF0713 Adherence; porin (VF0713) - Adherence dnaK chaperone protein DnaK - - - -}	{NA}	{NA}	{NA}	{false}	{NA}	{PF06723:MreB/Mbl protein PF02782:FGGY family of carbohydrate kinases, C-terminal domain}
MAR44G.1_GM000148	{Scaffold1:177823:178953:+}	{WP_055672331.1; molecular chaperone DnaJ [Roseibium alexandrii]}	{A6UEY1; Chaperone protein DnaJ }	{lagg:B0E33_09645; K03686 dnaJ molecular chaperone DnaJ -- --}	{WP.022999133.1; COG0484 DnaJ-class molecular chaperone with C-terminal Zn finger domain O Posttranslational modification, protein turnover, chaperones ;}	{NA}	{GO:0051082; unfolded protein binding; molecular_function GO:0031072; heat shock protein binding; molecular_function}	{PHI:10485; Q9HV44 dnaJ 287 Pseudomonas aeruginosa opportunistic infection Drosophila melanogaster (related: fruit fly) Heat shock protein Gene mutation; gene complementation reduced virulence}	{NA}	{NA}	{NA}	{NA}	{false}	{NA}	{PF00684:DnaJ central domain}
MAR44G.1_GM000149	{Scaffold1:179030:179689:+}	{WP_055672332.1; rRNA adenine N-6-methyltransferase family protein [Roseibium alexandrii]}	{NA}	{labp:FJ695_02240; K00570 pmtA phosphatidylethanolamine/phosphatidyl-N-methylethanolamine N-methyltransferase [EC:2.1.1.17 2.1.1.71] 2.1.1.17,2.1.1.71 Metabolism; Lipid metabolism; Glycerophospholipid metabolism [PATH:ko00564]}	{WP.077291050.1; COG3963 Phosphatidylethanolamine N-methyltransferase I Lipid transport and metabolism ;}	{NA}	{GO:0000179; rRNA (adenine-N6,N6-)-dimethyltransferase activity; molecular_function GO:0008649; rRNA methyltransferase activity; molecular_function GO:0008152; NA GO:0008168; methyltransferase activity; molecular_function GO:0000154; rRNA modification; biological_process GO:0006464; protein modification process; biological_process GO:0004719; protein-L-isoaspartate (D-aspartate) O-methyltransfera…	{NA}	{NA}	{NA}	{NA}	{NA}	{false}	{NA}	{PF01135:Protein-L-isoaspartate(D-aspartate) O-methyltransferase (PCMT) PF08241:Methyltransferase domain PF00398:Ribosomal RNA adenine dimethylase}
MAR44G.1_GM000150	{Scaffold1:179740:180315:+}	{WP_008193277.1; NAD(P)H-dependent oxidoreductase [Roseibium alexandrii]}	{NA}	{labp:FJ695_02235; K19784 chrR, NQR chromate reductase, NAD(P)H dehydrogenase (quinone) -- --}	{WP.055657064.1; COG0431 NAD(P)H-dependent FMN reductase C Energy production and conversion ;}	{NA}	{GO:0016491; oxidoreductase activity; molecular_function}	{NA}	{NA}	{NA}	{NA}	{NA}	{false}	{NA}	{PF03358:NADPH-dependent FMN reductase}
MAR44G.1_GM000151	{Scaffold1:180414:180974:+}	{WP_008192557.1; ATP-dependent protease subunit HslV [Roseibium alexandrii]}	{A5E8F2; ATP-dependent protease subunit HslV }	{labp:FJ695_02230; K01419 hslV, clpQ ATP-dependent HslUV protease, peptidase subunit HslV 3.4.25.2 --}	{WP.006935406.1; COG5405 ATP-dependent protease HslVU (ClpYQ), peptidase subunit O Posttranslational modification, protein turnover, chaperones ;}	{NA}	{GO:0005839; proteasome core complex; cellular_component GO:0051603; proteolysis involved in cellular protein catabolic process; biological_process GO:0004298; threonine-type endopeptidase activity; molecular_function}	{NA}	{NA}	{NA}	{NA}	{NA}	{false}	{NA}	{PF00227:Proteasome subunit}
MAR44G.1_GM000152	{Scaffold1:181143:182252:+}	{WP_134853057.1; hypothetical protein [Roseibium alexandrii]}	{NA}	{NA}	{NA}	{NA}	{NA}	{NA}	{NA}	{NA}	{NA}	{NA}	{false}	{NA}	{NA}
MAR44G.1_GM000153	{Scaffold1:182294:183598:+}	{WP_055672336.1; ATP-dependent protease ATPase subunit HslU [Roseibium alexandrii]}	{C0RFW7; ATP-dependent protease ATPase subunit HslU }	{labp:FJ695_02220; K03667 hslU ATP-dependent HslUV protease ATP-binding subunit HslU -- --}	{WP.022999128.1; COG1220 ATP-dependent protease HslVU (ClpYQ), ATPase subunit HslU O Posttranslational modification, protein turnover, chaperones ;}	{NA}	{GO:0019001; guanyl nucleotide binding; molecular_function GO:0006281; DNA repair; biological_process GO:0015995; chlorophyll biosynthetic process; biological_process GO:0015979; photosynthesis; biological_process GO:0005525; GTP binding; molecular_function GO:0006355; regulation of transcription, DNA-dependent; biological_process GO:0031683; G-protein beta/gamma-subunit complex binding; molecula…	{NA}	{NA}	{NA}	{NA}	{NA}	{false}	{NA}	{PF10662:Ethanolamine utilisation - propanediol utilisation PF01926:50S ribosome-binding GTPase PF00005:ABC transporter PF05496:Holliday junction DNA helicase ruvB N-terminus PF00503:G-protein alpha subunit PF00270:DEAD/DEAH box helicase PF00004:ATPase family associated with various cellular activities (AAA) PF07728:AAA domain (dynein-related subfamily) PF01591:6-phosphofructo-2-kinase PF00493:MC…
MAR44G.1_GM000154	{Scaffold1:183668:184162:+}	{WP_040451306.1; universal stress protein [Roseibium alexandrii]}	{NA}	{NA}	{WP.013655035.1; COG0589 Nucleotide-binding universal stress protein, UspA family T Signal transduction mechanisms ;}	{NA}	{GO:0006950; response to stress; biological_process}	{NA}	{NA}	{NA}	{NA}	{NA}	{false}	{NA}	{PF00582:Universal stress protein family}
MAR44G.1_GM000155	{Scaffold1:184357:184914:+}	{WP_008194306.1; NifU family protein [Roseibium alexandrii]}	{Q9UMS0; NFU1 iron-sulfur cluster scaffold homolog, mitochondrial }	{NA}	{WP.031268711.1; COG0694 Fe-S cluster biogenesis protein NfuA, 4Fe-4S-binding domain O Posttranslational modification, protein turnover, chaperones ;}	{NA}	{GO:0016226; iron-sulfur cluster assembly; biological_process GO:0051536; iron-sulfur cluster binding; molecular_function GO:0005506; iron ion binding; molecular_function}	{PHI:3348; Q2FID9 nfu 1280 Staphylococcus aureus skin infection; food poisoning; respiratory disease Mus musculus (related: house mouse) aids in the maturation of Iron-Sulphur proteins Gene deletion: full; gene complementation reduced virulence}	{NA}	{NA}	{NA}	{NA}	{false}	{NA}	{PF08712:Scaffold protein Nfu/NifU N terminal PF01106:NifU-like domain}
MAR44G.1_GM000156	{Scaffold1:185067:185744:+}	{WP_055672337.1; tRNA (adenosine(37)-N6)-threonylcarbamoyltransferase complex dimerization subunit type 1 TsaB [Roseibium alexandrii]}	{NA}	{labp:FJ695_02205; K14742 tsaB tRNA threonylcarbamoyladenosine biosynthesis protein TsaB -- --}	{WP.062492022.1; COG1214 tRNA A37 threonylcarbamoyladenosine modification protein TsaB J Translation, ribosomal structure and biogenesis ;}	{NA}	{NA}	{NA}	{NA}	{NA}	{NA}	{NA}	{false}	{NA}	{NA}
MAR44G.1_GM000157	{Scaffold1:185741:186229:+}	{WP_008197255.1; ribosomal protein S18-alanine N-acetyltransferase [Roseibium alexandrii]}	{NA}	{labp:FJ695_02200; K03789 rimI [ribosomal protein S18]-alanine N-acetyltransferase 2.3.1.266 --}	{NA}	{NA}	{GO:0016747; transferase activity, transferring acyl groups other than amino-acyl groups; molecular_function GO:0008080; N-acetyltransferase activity; molecular_function}	{NA}	{NA}	{NA}	{NA}	{NA}	{false}	{NA}	{PF08445:FR47-like protein PF13508:Acetyltransferase (GNAT) domain PF00583:Acetyltransferase (GNAT) family PF13302:Acetyltransferase (GNAT) domain PF13673:Acetyltransferase (GNAT) domain}
MAR44G.1_GM000158	{Scaffold1:186273:186722:+}	{WP_008197213.1; Fur family transcriptional regulator [Roseibium alexandrii]}	{O07315; Ferric uptake regulation protein }	{labp:FJ695_02195; K03711 fur, zur, furB Fur family transcriptional regulator, ferric uptake regulator -- --}	{WP.031268709.1; COG0735 Fe2+ or Zn2+ uptake regulation protein Fur/Zur P Inorganic ion transport and metabolism ;}	{NA}	{GO:0006355; regulation of transcription, DNA-dependent; biological_process GO:0006276; plasmid maintenance; biological_process GO:0006260; DNA replication; biological_process GO:0006807; nitrogen compound metabolic process; biological_process GO:0003700; sequence-specific DNA binding transcription factor activity; molecular_function GO:0016810; hydrolase activity, acting on carbon-nitrogen (but …	{PHI:4887; P0A9A9 Fur 562 Escherichia coli urinary tract infection Mus musculus (related: house mouse) global ferric uptake regulator Gene deletion: full; gene complementation reduced virulence}	{VFG000478; VF0113 Fur fur ferric iron uptake transcriptional regulator nan nan Repress the expression of iron-regulated genes; also required for acid-induced activation of atr genes nan}	{NA}	{NA}	{NA}	{false}	{NA}	{PF05732:Firmicute plasmid replication protein (RepL) PF00795:Carbon-nitrogen hydrolase PF01475:Ferric uptake regulator family}
MAR44G.1_GM000159	{Scaffold1:186715:187581:+}	{WP_055672338.1; lysophospholipid acyltransferase family protein [Roseibium alexandrii]}	{Q2YQS9; Lyso-ornithine lipid O-acyltransferase }	{labp:FJ695_02190; K22617 olsA lyso-ornithine lipid O-acyltransferase 2.3.1.270 --}	{WP.077291048.1; COG0204 1-acyl-sn-glycerol-3-phosphate acyltransferase I Lipid transport and metabolism ;}	{NA}	{GO:0008152; NA GO:0016746; transferase activity, transferring acyl groups; molecular_function}	{NA}	{NA}	{NA}	{NA}	{NA}	{false}	{NA}	{PF01553:Acyltransferase}
MAR44G.1_GM000160	{Scaffold1:187707:189167:+}	{WP_055672339.1; tRNA (N6-isopentenyl adenosine(37)-C2)-methylthiotransferase MiaB [Roseibium alexandrii]}	{Q11BD9; tRNA-2-methylthio-N(6)-dimethylallyladenosine synthase }	{labp:FJ695_02185; K06168 miaB tRNA-2-methylthio-N6-dimethylallyladenosine synthase 2.8.4.3 --}	{WP.077293212.1; COG0621 tRNA A37 methylthiotransferase MiaB J Translation, ribosomal structure and biogenesis ;}	{NA}	{GO:0009451; RNA modification; biological_process GO:0003824; NA GO:0051536; iron-sulfur cluster binding; molecular_function GO:0051539; 4 iron, 4 sulfur cluster binding; molecular_function}	{NA}	{NA}	{NA}	{NA}	{NA}	{false}	{NA}	{PF00919:Uncharacterized protein family UPF0004 PF04055:Radical SAM superfamily}
MAR44G.1_GM000161	{Scaffold1:189179:190300:+}	{CTQ71353.1; PhoH-like protein [Roseibium alexandrii]}	{P0A9K5; PhoH-like protein }	{labt:FIU93_03970; K06217 phoH, phoL phosphate starvation-inducible protein PhoH and related proteins -- --}	{WP.022999120.1; COG1702 Phosphate starvation-inducible protein PhoH, predicted ATPase T Signal transduction mechanisms ;}	{NA}	{GO:0000723; telomere maintenance; biological_process GO:0005524; ATP binding; molecular_function GO:0006281; DNA repair; biological_process GO:0003678; DNA helicase activity; molecular_function}	{NA}	{NA}	{NA}	{NA}	{NA}	{true}	{NA}	{PF00580:UvrD/REP helicase N-terminal domain PF01695:IstB-like ATP binding protein PF00004:ATPase family associated with various cellular activities (AAA) PF05970:PIF1-like helicase PF02562:PhoH-like protein PF01443:Viral (Superfamily 1) RNA helicase}
MAR44G.1_GM000162	{Scaffold1:190233:190832:+}	{CTQ71356.1; Endoribonuclease YbeY [Roseibium alexandrii]}	{B9JZJ4; Endoribonuclease YbeY }	{labp:FJ695_02175; K07042 ybeY, yqfG probable rRNA maturation factor -- --}	{WP.075281731.1; COG0319 ssRNA-specific RNase YbeY, 16S rRNA maturation enzyme J Translation, ribosomal structure and biogenesis ;}	{NA}	{GO:0006364; rRNA processing; biological_process GO:0004222; metalloendopeptidase activity; molecular_function}	{PHI:9125; Q2YQS6 ybeY (bab1_2156) 235 Brucella abortus brucellosis Mus musculus (related: house mouse) Endoribonuclease Gene disruption; gene complementation reduced virulence}	{NA}	{NA}	{NA}	{NA}	{false}	{NA}	{PF02130:Uncharacterized protein family UPF0054}
MAR44G.1_GM000163	{Scaffold1:190882:192063:+}	{WP_081450542.1; hemolysin family protein [Roseibium alexandrii]}	{NA}	{labp:FJ695_02170; K06189 corC, tlyC hemolysin (HlyC) family protein -- --}	{WP.022999118.1; COG1253 Hemolysin-related protein, contains CBS domains, UPF0053 family R General function prediction only ;}	{NA}	{GO:0030554; adenyl nucleotide binding; molecular_function}	{NA}	{NA}	{NA}	{NA}	{NA}	{true}	{NA}	{PF00571:CBS domain}
MAR44G.1_GM000164	{Scaffold1:192135:193811:+}	{CTQ71361.1; Apolipoprotein N-acyltransferase [Roseibium alexandrii]}	{Q89WA1; Apolipoprotein N-acyltransferase }	{labp:FJ695_02165; K03820 lnt apolipoprotein N-acyltransferase 2.3.1.269 --}	{WP.077293211.1; COG0815 Apolipoprotein N-acyltransferase M Cell wall/membrane/envelope biogenesis ;}	{NA}	{GO:0016810; hydrolase activity, acting on carbon-nitrogen (but not peptide) bonds; molecular_function GO:0006807; nitrogen compound metabolic process; biological_process}	{NA}	{NA}	{NA}	{NA}	{NA}	{false}	{NA}	{PF00795:Carbon-nitrogen hydrolase}
MAR44G.1_GM000165	{Scaffold1:194070:194408:+}	{WP_040452727.1; helix-turn-helix transcriptional regulator [Roseibium alexandrii]}	{A6U5H5; Uncharacterized HTH-type transcriptional regulator Smed_0045 }	{NA}	{WP.023014432.1; COG1396 Transcriptional regulator, contains XRE-family HTH domain K Transcription ;}	{NA}	{GO:0043565; sequence-specific DNA binding; molecular_function}	{NA}	{NA}	{NA}	{NA}	{NA}	{false}	{NA}	{PF13443:Cro/C1-type HTH DNA-binding domain PF01381:Helix-turn-helix}
MAR44G.1_GM000166	{Scaffold1:194520:195692:+}	{WP_040451311.1; methionine adenosyltransferase [Roseibium alexandrii]}	{B1M4Z8; S-adenosylmethionine synthase }	{labp:FJ695_02155; K00789 metK, MAT S-adenosylmethionine synthetase 2.5.1.6 Metabolism; Amino acid metabolism; Cysteine and methionine metabolism [PATH:ko00270] Metabolism; Biosynthesis of other secondary metabolites; Biosynthesis of various plant secondary metabolites [PATH:ko00999]}	{WP.022999115.1; COG0192 S-adenosylmethionine synthetase H Coenzyme transport and metabolism ;}	{NA}	{GO:0006556; S-adenosylmethionine biosynthetic process; biological_process GO:0004478; methionine adenosyltransferase activity; molecular_function}	{PHI:877; G4NCL5 MGG_00383 318829 Magnaporthe oryzae blast (rice) Oryza sativa (related: rice) Hypothetical protein Gene disruption reduced virulence}	{NA}	{NA}	{NA}	{NA}	{false}	{NA}	{PF02772:S-adenosylmethionine synthetase, central domain PF00438:S-adenosylmethionine synthetase, N-terminal domain PF02773:S-adenosylmethionine synthetase, C-terminal domain}
MAR44G.1_GM000167	{Scaffold1:195766:196452:+}	{CTQ71369.1; tRNA (guanine-N(7)-)-methyltransferase [Roseibium alexandrii]}	{Q98BJ3; tRNA (guanine-N(7)-)-methyltransferase }	{labp:FJ695_02150; K03439 trmB, METTL1, TRM8 tRNA (guanine-N7-)-methyltransferase 2.1.1.33 --}	{WP.077291047.1; COG0220 tRNA G46 N7-methylase TrmB J Translation, ribosomal structure and biogenesis ;}	{NA}	{GO:0006400; tRNA modification; biological_process GO:0008176; tRNA (guanine-N7-)-methyltransferase activity; molecular_function}	{NA}	{NA}	{NA}	{NA}	{NA}	{false}	{NA}	{PF02390:Putative methyltransferase }
MAR44G.1_GM000168	{Scaffold1:196750:197346:+}	{WP_008193613.1; ribosome maturation factor RimP [Roseibium alexandrii]}	{A8IG16; Ribosome maturation factor RimP }	{labp:FJ695_02145; K09748 rimP ribosome maturation factor RimP -- --}	{WP.077291046.1; COG0779 Ribosome maturation factor RimP J Translation, ribosomal structure and biogenesis ;}	{NA}	{NA}	{NA}	{NA}	{NA}	{NA}	{NA}	{false}	{NA}	{NA}
MAR44G.1_GM000169	{Scaffold1:197412:199064:+}	{WP_008193250.1; transcription termination factor NusA [Roseibium alexandrii]}	{Q92HF4; Transcription termination/antitermination protein NusA }	{labr:CHH27_21590; K02600 nusA transcription termination/antitermination protein NusA -- --}	{WP.022999112.1; COG0195 Transcription antitermination factor NusA, contains S1 and KH domains K Transcription ;}	{NA}	{GO:0003723; RNA binding; molecular_function GO:0005840; ribosome; cellular_component GO:0006412; translation; biological_process GO:0003735; structural constituent of ribosome; molecular_function GO:0019028; viral capsid; cellular_component GO:0005622; intracellular; cellular_component GO:0003700; sequence-specific DNA binding transcription factor activity; molecular_function GO:0005198; NA GO:0…	{NA}	{NA}	{NA}	{NA}	{NA}	{false}	{NA}	{PF08529:NusA N-terminal domain PF07124:Phytoreovirus outer capsid protein P8 PF07650:KH domain PF00833:Ribosomal S17 PF00013:KH domain PF13184:NusA-like KH domain PF00575:S1 RNA binding domain}
MAR44G.1_GM000170	{Scaffold1:199212:199847:+}	{WP_008192180.1; RNA-binding protein [Roseibium alexandrii]}	{NA}	{labp:FJ695_02135; K07742 ylxR uncharacterized protein -- --}	{WP.031268706.1; COG2740 Nucleoid-associated protein YlxR, Predicted RNA-binding, DUF448 family R General function prediction only ;}	{NA}	{NA}	{NA}	{NA}	{NA}	{NA}	{NA}	{false}	{NA}	{NA}
MAR44G.1_GM000171	{Scaffold1:199877:202615:+}	{WP_008189585.1; translation initiation factor IF-2 [Roseibium alexandrii]}	{A6UF29; Translation initiation factor IF-2 }	{labp:FJ695_02130; K02519 infB, MTIF2 translation initiation factor IF-2 -- --}	{WP.022999109.1; COG0532 Translation initiation factor IF-2, a GTPase J Translation, ribosomal structure and biogenesis ;}	{NA}	{GO:0005622; intracellular; cellular_component GO:0015684; ferrous iron transport; biological_process GO:0006413; translational initiation; biological_process GO:0016021; integral to membrane; cellular_component GO:0005525; GTP binding; molecular_function GO:0005524; ATP binding; molecular_function GO:0003743; translation initiation factor activity; molecular_function GO:0003924; GTPase activity;…	{NA}	{NA}	{NA}	{NA}	{NA}	{false}	{NA}	{PF03144:Elongation factor Tu domain 2 PF10662:Ethanolamine utilisation - propanediol utilisation PF08477:Ras of Complex, Roc, domain of DAPkinase PF04548:AIG1 family PF00009:Elongation factor Tu GTP binding domain PF01926:50S ribosome-binding GTPase PF04760:Translation initiation factor IF-2, N-terminal region PF02421:Ferrous iron transport protein B PF03193:Protein of unknown function, DUF258 P…
MAR44G.1_GM000172	{Scaffold1:202714:203124:+}	{OJJ12672.1; ribosome-binding factor A [Alphaproteobacteria bacterium AO1-B]}	{A4YJF0; Ribosome-binding factor A }	{labr:CHH27_21605; K02834 rbfA ribosome-binding factor A -- --}	{WP.055657070.1; COG0858 Ribosome-binding factor RbfA J Translation, ribosomal structure and biogenesis ;}	{NA}	{GO:0006364; rRNA processing; biological_process}	{NA}	{NA}	{NA}	{NA}	{NA}	{false}	{NA}	{PF02033:Ribosome-binding factor A}
MAR44G.1_GM000173	{Scaffold1:203210:204154:+}	{WP_208981349.1; tRNA pseudouridine(55) synthase TruB [Roseibium alexandrii]}	{Q8UJ53; tRNA pseudouridine synthase B }	{labp:FJ695_02120; K03177 truB, PUS4, TRUB1 tRNA pseudouridine55 synthase 5.4.99.25 --}	{WP.077291045.1; COG0130 tRNA U55 pseudouridine synthase TruB, may also work on U342 of tmRNA J Translation, ribosomal structure and biogenesis ;}	{NA}	{GO:0009982; pseudouridine synthase activity; molecular_function GO:0003723; RNA binding; molecular_function GO:0006396; RNA processing; biological_process GO:0009451; RNA modification; biological_process GO:0001522; pseudouridine synthesis; biological_process}	{NA}	{NA}	{NA}	{NA}	{NA}	{false}	{NA}	{PF09157:Pseudouridine synthase II TruB, C-terminal PF01509:TruB family pseudouridylate synthase (N terminal domain)}
MAR44G.1_GM000174	{Scaffold1:204244:205638:+}	{WP_008190815.1; FAD-dependent oxidoreductase [Roseibium alexandrii]}	{NA}	{NA}	{WP.024096847.1; COG1231 Monoamine oxidase E Amino acid transport and metabolism ;}	{NA}	{GO:0050151; oleate hydratase activity; molecular_function GO:0006631; fatty acid metabolic process; biological_process GO:0016491; oxidoreductase activity; molecular_function GO:0016117; carotenoid biosynthetic process; biological_process GO:0050660; flavin adenine dinucleotide binding; molecular_function GO:0008033; tRNA processing; biological_process GO:0016705; oxidoreductase activity, acting…	{NA}	{NA}	{NA}	{NA}	{NA}	{false}	{NA}	{PF01593:Flavin containing amine oxidoreductase PF06100:MCRA family PF05834:Lycopene cyclase protein PF07992:Pyridine nucleotide-disulphide oxidoreductase PF00070:Pyridine nucleotide-disulphide oxidoreductase PF01134:Glucose inhibited division protein A PF01266:FAD dependent oxidoreductase}
MAR44G.1_GM000175	{Scaffold1:205782:205907:-}	{NA}	{NA}	{NA}	{NA}	{NA}	{NA}	{NA}	{NA}	{NA}	{NA}	{NA}	{false}	{NA}	{NA}
MAR44G.1_GM000176	{Scaffold1:205897:206166:+}	{WP_040451314.1; 30S ribosomal protein S15 [Roseibium alexandrii]}	{Q1GKK2; 30S ribosomal protein S15 }	{labp:FJ695_02105; K02956 RP-S15, MRPS15, rpsO small subunit ribosomal protein S15 -- Genetic Information Processing; Translation; Ribosome [PATH:ko03010]}	{WP.006935430.1; COG0184 Ribosomal protein S15P/S13E J Translation, ribosomal structure and biogenesis ;}	{NA}	{GO:0003735; structural constituent of ribosome; molecular_function GO:0006412; translation; biological_process GO:0005840; ribosome; cellular_component GO:0005622; intracellular; cellular_component}	{NA}	{NA}	{NA}	{NA}	{NA}	{false}	{NA}	{PF00312:Ribosomal protein S15}
MAR44G.1_GM000177	{Scaffold1:206479:208614:+}	{WP_055672423.1; polyribonucleotide nucleotidyltransferase [Roseibium alexandrii]}	{B2S9G0; Polyribonucleotide nucleotidyltransferase }	{labp:FJ695_02100; K00962 pnp, PNPT1 polyribonucleotide nucleotidyltransferase 2.7.7.8 Genetic Information Processing; Folding, sorting and degradation; RNA degradation [PATH:ko03018]}	{WP.031268705.1; COG1185 Polyribonucleotide nucleotidyltransferase (polynucleotide phosphorylase) J Translation, ribosomal structure and biogenesis ;}	{NA}	{GO:0003677; DNA binding; molecular_function GO:0000175; 3'-5'-exoribonuclease activity; molecular_function GO:0003723; RNA binding; molecular_function GO:0006396; RNA processing; biological_process}	{PHI:3878; Q8ZLT3 pnp 28901 Salmonella enterica food poisoning Sus scrofa (related: pig) "polynucleotide phosphorylase, an exoribonuclease involved in RNA processing and degradation" Gene mutation reduced virulence}	{NA}	{NA}	{NA}	{NA}	{false}	{NA}	{PF03310:Caulimovirus DNA-binding protein PF00013:KH domain PF03726:Polyribonucleotide nucleotidyltransferase, RNA binding domain PF00575:S1 RNA binding domain}
MAR44G.1_GM000178	{Scaffold1:208814:209626:+}	{WP_055672349.1; 4-hydroxy-tetrahydrodipicolinate reductase [Roseibium alexandrii]}	{B9J6R4; 4-hydroxy-tetrahydrodipicolinate reductase }	{labp:FJ695_02080; K00215 dapB 4-hydroxy-tetrahydrodipicolinate reductase 1.17.1.8 Metabolism; Amino acid metabolism; Lysine biosynthesis [PATH:ko00300] Metabolism; Biosynthesis of other secondary metabolites; Monobactam biosynthesis [PATH:ko00261]}	{WP.077293210.1; COG0289 4-hydroxy-tetrahydrodipicolinate reductase E Amino acid transport and metabolism ;}	{NA}	{GO:0055114; oxidation-reduction process; biological_process GO:0008839; dihydrodipicolinate reductase activity; molecular_function GO:0009089; lysine biosynthetic process via diaminopimelate; biological_process}	{NA}	{NA}	{NA}	{NA}	{NA}	{false}	{NA}	{PF01113:Dihydrodipicolinate reductase, N-terminus PF05173:Dihydrodipicolinate reductase, C-terminus}
MAR44G.1_GM000179	{Scaffold1:209660:210280:+}	{WP_008192481.1; 2,3-bisphosphoglycerate-dependent phosphoglycerate mutase [Roseibium alexandrii]}	{Q21CH5; 2,3-bisphosphoglycerate-dependent phosphoglycerate mutase }	{labp:FJ695_02075; K01834 PGAM, gpmA 2,3-bisphosphoglycerate-dependent phosphoglycerate mutase 5.4.2.11 Metabolism; Carbohydrate metabolism; Glycolysis / Gluconeogenesis [PATH:ko00010] Metabolism; Energy metabolism; Methane metabolism [PATH:ko00680] Metabolism; Amino acid metabolism; Glycine, serine and threonine metabolism [PATH:ko00260] Organismal Systems; Endocrine system; Glucagon signaling p…	{WP.022999102.1; COG0588 Phosphoglycerate mutase (BPG-dependent) G Carbohydrate transport and metabolism ;}	{NA}	{NA}	{NA}	{NA}	{NA}	{NA}	{NA}	{false}	{NA}	{NA}
MAR44G.1_GM000180	{Scaffold1:210332:211333:-}	{WP_055672351.1; adenosine kinase [Roseibium alexandrii]}	{NA}	{NA}	{WP.022999064.1; COG0524 Sugar or nucleoside kinase, ribokinase family G Carbohydrate transport and metabolism ;}	{NA}	{NA}	{NA}	{NA}	{NA}	{NA}	{NA}	{false}	{QOF95749.1_; GH4 maltose-6-phosphate glucosidase (EC 3.2.1.122); alpha-glucosidase (EC 3.2.1.20); alpha-galactosidase (EC 3.2.1.22); 6-phospho-beta-glucosidase (EC 3.2.1.86); alpha-glucuronidase (EC 3.2.1.139); alpha-galacturonase (EC 3.2.1.67); palatinase (EC 3.2.1.-) }	{NA}
MAR44G.1_GM000181	{Scaffold1:211373:212263:-}	{WP_008188838.1; prephenate dehydratase [Roseibium alexandrii]}	{NA}	{labp:FJ695_02065; K04518 pheA2 prephenate dehydratase 4.2.1.51 Metabolism; Amino acid metabolism; Phenylalanine, tyrosine and tryptophan biosynthesis [PATH:ko00400]}	{WP.022999063.1; COG0077 Prephenate dehydratase E Amino acid transport and metabolism ;}	{NA}	{GO:0009094; L-phenylalanine biosynthetic process; biological_process GO:0004664; prephenate dehydratase activity; molecular_function GO:0016597; amino acid binding; molecular_function GO:0008152; NA}	{NA}	{NA}	{NA}	{NA}	{NA}	{false}	{NA}	{PF00800:Prephenate dehydratase PF01842:ACT domain}
MAR44G.1_GM000182	{Scaffold1:212291:212938:-}	{CTQ71415.1; 3-deoxy-manno-octulosonate cytidylyltransferase [Roseibium alexandrii]}	{Q133H9; 3-deoxy-manno-octulosonate cytidylyltransferase }	{labp:FJ695_02060; K00979 kdsB 3-deoxy-manno-octulosonate cytidylyltransferase (CMP-KDO synthetase) 2.7.7.38 Metabolism; Glycan biosynthesis and metabolism; Lipopolysaccharide biosynthesis [PATH:ko00540]}	{WP.022999062.1; COG1212 CMP-2-keto-3-deoxyoctulosonic acid synthetase M Cell wall/membrane/envelope biogenesis ;}	{NA}	{GO:0009103; lipopolysaccharide biosynthetic process; biological_process}	{NA}	{VFG011424; VF0367 LPS kdsB 3-deoxy-manno-octulosonate cytidylyltransferase Brucella possesses a non-classical LPS as compared with the so-called classical LPS from enterobacteria such as Escherichia coli. B. abortus lipid A possesses a diaminoglucose backbone (rather than glucosamine), and acyl groups are longer (C28 rather than C12 and C16) and are only linked to the core by amide bounds (rathe…	{NA}	{NA}	{NA}	{false}	{NA}	{PF02348:Cytidylyltransferase}
MAR44G.1_GM000183	{Scaffold1:213226:213777:+}	{WP_008189097.1; cytochrome c family protein [Roseibium alexandrii]}	{P30323; Cytochrome c homolog }	{labp:FJ695_02055; K08738 CYC cytochrome c -- Metabolism; Energy metabolism; Oxidative phosphorylation [PATH:ko00190] Environmental Information Processing; Signal transduction; Two-component system [PATH:ko02020] Cellular Processes; Cell growth and death; Apoptosis [PATH:ko04210] Cellular Processes; Cell growth and death; Apoptosis - fly [PATH:ko04214] Cellular Processes; Cell growth and death; A…	{WP.022999061.1; COG3474 Cytochrome c2 C Energy production and conversion ;}	{NA}	{GO:0020037; heme binding; molecular_function GO:0009055; NA GO:0005506; iron ion binding; molecular_function}	{NA}	{NA}	{NA}	{NA}	{NA}	{false}	{NA}	{PF13442:Cytochrome C oxidase, cbb3-type, subunit III PF00034:Cytochrome c}
MAR44G.1_GM000184	{Scaffold1:213934:215364:+}	{WP_134853056.1; diguanylate cyclase [Roseibium alexandrii]}	{NA}	{NA}	{WP.077291022.1; COG3452 Extracellular (periplasmic) sensor domain CHASE (specificity unknown) T Signal transduction mechanisms ;}	{NA}	{NA}	{NA}	{NA}	{NA}	{NA}	{NA}	{false}	{NA}	{NA}
MAR44G.1_GM000185	{Scaffold1:215468:217348:+}	{WP_055672425.1; extracellular solute-binding protein [Roseibium alexandrii]}	{P55691; Uncharacterized protein y4wM }	{labp:FJ695_02045; K13893 yejA microcin C transport system substrate-binding protein -- Environmental Information Processing; Membrane transport; ABC transporters [PATH:ko02010]}	{WP.077291021.1; COG4166 ABC-type oligopeptide transport system, periplasmic component E Amino acid transport and metabolism ;}	{gnl|TC-DB|7Z8E_A; 3.A.1.5.49 Chain A, ABC transporter substrate-binding protein}	{GO:0006810; transport; biological_process GO:0005215; NA}	{NA}	{NA}	{NA}	{NA}	{NA}	{false}	{AZV31449.1_; GH23 lysozyme type G (EC 3.2.1.17); peptidoglycan lyase (EC 4.2.2.n1) also known in the literature as peptidoglycan lytic transglycosylase; chitinase (EC 3.2.1.14) }	{PF00496:Bacterial extracellular solute-binding proteins, family 5 Middle}
MAR44G.1_GM000186	{Scaffold1:217345:219237:+}	{WP_055672353.1; ABC transporter substrate-binding protein [Roseibium alexandrii]}	{NA}	{labp:FJ695_02040; K13893 yejA microcin C transport system substrate-binding protein -- Environmental Information Processing; Membrane transport; ABC transporters [PATH:ko02010]}	{WP.077291020.1; COG4166 ABC-type oligopeptide transport system, periplasmic component E Amino acid transport and metabolism ;}	{NA}	{GO:0005215; NA GO:0006810; transport; biological_process}	{PHI:11539; C0RG76 A0009 29459 Brucella melitensis brucellosis Mus musculus (related: house mouse) Extracellular solute-binding protein family 5 Gene deletion: full; gene complementation unaffected pathogenicity}	{NA}	{NA}	{NA}	{NA}	{false}	{AZV31449.1_; GH23 lysozyme type G (EC 3.2.1.17); peptidoglycan lyase (EC 4.2.2.n1) also known in the literature as peptidoglycan lytic transglycosylase; chitinase (EC 3.2.1.14) }	{PF00496:Bacterial extracellular solute-binding proteins, family 5 Middle}
MAR44G.1_GM000187	{Scaffold1:219302:220423:+}	{WP_040451318.1; microcin C ABC transporter permease YejB [Roseibium alexandrii]}	{P0AFU1; Inner membrane ABC transporter permease protein YejB }	{labp:FJ695_02035; K13894 yejB microcin C transport system permease protein -- Environmental Information Processing; Membrane transport; ABC transporters [PATH:ko02010]}	{WP.022999057.1; COG4174 ABC-type microcin C transport system, permease component YejB Q Secondary metabolites biosynthesis, transport and catabolism ;}	{gnl|TC-DB|RVM24494; 3.A.1.5.49 microcin C ABC transporter permease YejB [Sinorhizobium meliloti]}	{GO:0006810; transport; biological_process GO:0005215; NA GO:0016020; membrane; cellular_component}	{NA}	{NA}	{NA}	{NA}	{NA}	{false}	{NA}	{PF00528:Binding-protein-dependent transport system inner membrane component}
MAR44G.1_GM000188	{Scaffold1:220428:221612:+}	{EEE43822.1; ABC-type uncharacterized transport system, permease component [Roseibium alexandrii DFL-11]}	{P33915; Inner membrane ABC transporter permease protein YejE }	{labp:FJ695_02030; K13895 yejE microcin C transport system permease protein -- Environmental Information Processing; Membrane transport; ABC transporters [PATH:ko02010]}	{WP.013655001.1; COG4239 ABC-type microcin C transport system, permease component YejE Q Secondary metabolites biosynthesis, transport and catabolism ;}	{gnl|TC-DB|CCM69332; 3.A.1.5.49 Inner membrane ABC transporter permease protein yejE [Sinorhizobium meliloti Rm41]}	{GO:0005215; NA GO:0016020; membrane; cellular_component GO:0006810; transport; biological_process}	{NA}	{NA}	{NA}	{NA}	{NA}	{false}	{NA}	{PF00528:Binding-protein-dependent transport system inner membrane component}
MAR44G.1_GM000189	{Scaffold1:221623:223254:+}	{WP_008189969.1; ABC transporter ATP-binding protein [Roseibium alexandrii]}	{P33916; Uncharacterized ABC transporter ATP-binding protein YejF }	{labp:FJ695_02025; K13896 yejF microcin C transport system ATP-binding protein -- Environmental Information Processing; Membrane transport; ABC transporters [PATH:ko02010]}	{WP.055659277.1; COG4172 ABC-type microcin C transport system, duplicated ATPase component YejF Q Secondary metabolites biosynthesis, transport and catabolism ;}	{gnl|TC-DB|CCM69331; 3.A.1.5.49 putative ABC transporter ATP-binding protein YejF [Sinorhizobium meliloti Rm41]}	{GO:0004020; adenylylsulfate kinase activity; molecular_function GO:0016887; ATPase activity; molecular_function GO:0005524; ATP binding; molecular_function GO:0003774; motor activity; molecular_function GO:0006355; regulation of transcription, DNA-dependent; biological_process GO:0005525; GTP binding; molecular_function GO:0015979; photosynthesis; biological_process GO:0000103; sulfate assimilat…	{PHI:7820; H7C7Q3 oppD (bb0334) 139 Borreliella burgdorferi lyme disease Mus musculus (related: house mouse) Oligopepeptide (Opp) transporter that drives transport by hydrolyzing ATP Gene mutation; chemical complementation reduced virulence}	{NA}	{NA}	{NA}	{NA}	{false}	{NA}	{PF01583:Adenylylsulphate kinase PF01926:50S ribosome-binding GTPase PF00006:ATP synthase alpha/beta family, nucleotide-binding domain PF00005:ABC transporter PF00485:Phosphoribulokinase / Uridine kinase family PF07728:AAA domain (dynein-related subfamily) PF08352:Oligopeptide/dipeptide transporter, C-terminal region PF00004:ATPase family associated with various cellular activities (AAA) PF00931:…
MAR44G.1_GM000190	{Scaffold1:223310:223921:+}	{WP_008193745.1; hypothetical protein [Roseibium alexandrii]}	{NA}	{NA}	{WP.011655077.1; COG3678 Periplasmic chaperone Spy, Spy/CpxP family O Posttranslational modification, protein turnover, chaperones ;}	{NA}	{NA}	{NA}	{NA}	{NA}	{NA}	{YES}	{false}	{NA}	{NA}
MAR44G.1_GM000191	{Scaffold1:223956:224582:-}	{WP_055672355.1; hypothetical protein [Roseibium alexandrii]}	{NA}	{NA}	{NA}	{NA}	{NA}	{NA}	{NA}	{NA}	{NA}	{NA}	{false}	{NA}	{NA}
MAR44G.1_GM000192	{Scaffold1:224662:225876:-}	{WP_008194090.1; lytic murein transglycosylase [Roseibium alexandrii]}	{NA}	{NA}	{WP.077293207.1; COG2951 Membrane-bound lytic murein transglycosylase B M Cell wall/membrane/envelope biogenesis ;}	{NA}	{GO:0004040; amidase activity; molecular_function GO:0009253; peptidoglycan catabolic process; biological_process}	{NA}	{NA}	{NA}	{NA}	{YES}	{false}	{QDG74732.1_; GH103 peptidoglycan lytic transglycosylase (EC 3.2.1.-) }	{PF01832:Mannosyl-glycoprotein endo-beta-N-acetylglucosaminidase}
MAR44G.1_GM000193	{Scaffold1:225941:226519:-}	{WP_055672357.1; histidine phosphatase family protein [Roseibium alexandrii]}	{NA}	{NA}	{WP.077291016.1; COG0406 Broad specificity phosphatase PhoE G Carbohydrate transport and metabolism ;}	{NA}	{NA}	{NA}	{NA}	{NA}	{NA}	{NA}	{false}	{NA}	{NA}
MAR44G.1_GM000194	{Scaffold1:226516:227463:-}	{WP_055672358.1; NAD(+) diphosphatase [Roseibium alexandrii]}	{Q4R7L8; NAD-capped RNA hydrolase NUDT12 }	{labp:FJ695_01975; K03426 E3.6.1.22, NUDT12, nudC NAD+ diphosphatase 3.6.1.22 Metabolism; Metabolism of cofactors and vitamins; Nicotinate and nicotinamide metabolism [PATH:ko00760] Cellular Processes; Transport and catabolism; Peroxisome [PATH:ko04146]}	{WP.077291015.1; COG2816 NADH pyrophosphatase NudC, Nudix superfamily F Nucleotide transport and metabolism ;}	{NA}	{GO:0016151; nickel ion binding; molecular_function GO:0005622; intracellular; cellular_component GO:0006464; protein modification process; biological_process GO:0006412; translation; biological_process GO:0003735; structural constituent of ribosome; molecular_function GO:0016787; hydrolase activity; molecular_function GO:0046872; metal ion binding; molecular_function GO:0005840; ribosome; cellul…	{NA}	{NA}	{NA}	{NA}	{NA}	{false}	{NA}	{PF09297:NADH pyrophosphatase zinc ribbon domain PF09296:NADH pyrophosphatase-like rudimentary NUDIX domain PF01155:Hydrogenase/urease nickel incorporation, metallochaperone, hypA PF01599:Ribosomal protein S27a PF00293:NUDIX domain}
MAR44G.1_GM000195	{Scaffold1:227506:227931:-}	{WP_008193136.1; HIT family protein [Roseibium alexandrii]}	{NA}	{NA}	{WP.022999048.1; COG0537 Purine nucleoside phosphoramidase/Ap4A hydrolase, histidine triade (HIT) family FR Nucleotide transport and metabolism ; General function prediction only ;}	{NA}	{NA}	{NA}	{NA}	{NA}	{NA}	{NA}	{false}	{NA}	{NA}
MAR44G.1_GM000196	{Scaffold1:228460:230409:+}	{EEE43267.2; DNA polymerase III, subunit gamma and tau [Roseibium alexandrii DFL-11]}	{P43746; DNA polymerase III subunit tau/gamma }	{labp:FJ695_01945; K02343 dnaX DNA polymerase III subunit gamma/tau 2.7.7.7 Genetic Information Processing; Replication and repair; DNA replication [PATH:ko03030] Genetic Information Processing; Replication and repair; Mismatch repair [PATH:ko03430] Genetic Information Processing; Replication and repair; Homologous recombination [PATH:ko03440]}	{WP.077293205.1; COG2812 DNA polymerase III, gamma/tau subunits L Replication, recombination and repair ;}	{NA}	{GO:0070526; threonylcarbamoyladenosine biosynthetic process; biological_process GO:0003723; RNA binding; molecular_function GO:0006281; DNA repair; biological_process GO:0006310; DNA recombination; biological_process GO:0003887; DNA-directed DNA polymerase activity; molecular_function GO:0009378; four-way junction helicase activity; molecular_function GO:0006614; SRP-dependent cotranslational pr…	{NA}	{NA}	{NA}	{NA}	{NA}	{false}	{NA}	{PF00004:ATPase family associated with various cellular activities (AAA) PF07728:AAA domain (dynein-related subfamily) PF00910:RNA helicase PF12169:DNA polymerase III subunits gamma and tau domain III PF02367:Threonylcarbamoyl adenosine biosynthesis protein TsaE PF00448:SRP54-type protein, GTPase domain PF05496:Holliday junction DNA helicase ruvB N-terminus}
MAR44G.1_GM000197	{Scaffold1:230527:230847:+}	{WP_008194365.1; YbaB/EbfC family nucleoid-associated protein [Roseibium alexandrii]}	{C0RG97; Nucleoid-associated protein BMEA_A0033 }	{labp:FJ695_01940; K09747 ebfC nucleoid-associated protein EbfC -- --}	{WP.006935456.1; COG0718 DNA-binding nucleoid-associated protein YbaB/EfbC K Transcription ;}	{NA}	{NA}	{NA}	{NA}	{NA}	{NA}	{NA}	{false}	{NA}	{NA}
MAR44G.1_GM000198	{Scaffold1:230948:231070:-}	{NA}	{NA}	{NA}	{NA}	{NA}	{NA}	{NA}	{NA}	{NA}	{NA}	{NA}	{false}	{NA}	{NA}
MAR44G.1_GM000199	{Scaffold1:231222:231830:+}	{WP_008192287.1; recombination mediator RecR [Roseibium alexandrii]}	{A6WUV0; Recombination protein RecR }	{labp:FJ695_01935; K06187 recR recombination protein RecR -- Genetic Information Processing; Replication and repair; Homologous recombination [PATH:ko03440]}	{WP.022999043.1; COG0353 Recombinational DNA repair protein RecR L Replication, recombination and repair ;}	{NA}	{NA}	{NA}	{NA}	{NA}	{NA}	{NA}	{false}	{NA}	{NA}
MAR44G.1_GM000200	{Scaffold1:231849:232595:-}	{WP_055672362.1; class I SAM-dependent methyltransferase [Roseibium alexandrii]}	{NA}	{NA}	{WP.082675897.1; COG4106 Trans-aconitate methyltransferase C Energy production and conversion ;}	{NA}	{GO:0008276; protein methyltransferase activity; molecular_function GO:0008168; methyltransferase activity; molecular_function GO:0008152; NA GO:0008610; lipid biosynthetic process; biological_process GO:0005737; cytoplasm; cellular_component GO:0006479; protein methylation; biological_process}	{NA}	{NA}	{NA}	{NA}	{NA}	{false}	{NA}	{PF05175:Methyltransferase small domain PF08241:Methyltransferase domain PF01209:ubiE/COQ5 methyltransferase family PF01795:MraW methylase family PF06325:Ribosomal protein L11 methyltransferase (PrmA) PF02353:Mycolic acid cyclopropane synthetase}
MAR44G.1_GM000201	{Scaffold1:232752:233315:+}	{WP_055672363.1; GNAT family N-acetyltransferase [Roseibium alexandrii]}	{NA}	{NA}	{NA}	{NA}	{GO:0008080; N-acetyltransferase activity; molecular_function}	{NA}	{NA}	{NA}	{NA}	{NA}	{false}	{NA}	{PF00583:Acetyltransferase (GNAT) family PF13302:Acetyltransferase (GNAT) domain}
MAR44G.1_GM000202	{Scaffold1:233395:234078:+}	{WP_008195840.1; sulfate transporter family protein [Roseibium alexandrii]}	{NA}	{labp:FJ695_01915; K06203 cysZ CysZ protein -- --}	{WP.022999041.1; COG2981 Sulfate transporter CysZ EP Amino acid transport and metabolism ; Inorganic ion transport and metabolism ;}	{NA}	{NA}	{NA}	{NA}	{NA}	{NA}	{NA}	{false}	{NA}	{NA}
MAR44G.1_GM000203	{Scaffold1:234117:234824:+}	{WP_144432158.1; EI24 domain-containing protein [Roseibium alexandrii]}	{NA}	{NA}	{NA}	{NA}	{NA}	{NA}	{NA}	{NA}	{NA}	{NA}	{false}	{NA}	{NA}
MAR44G.1_GM000204	{Scaffold1:234853:235785:+}	{WP_055672429.1; glutaminase [Roseibium alexandrii]}	{Q8UEA1; Glutaminase }	{lagg:B0E33_09175; K01425 glsA, GLS glutaminase 3.5.1.2 Metabolism; Amino acid metabolism; Alanine, aspartate and glutamate metabolism [PATH:ko00250] Metabolism; Amino acid metabolism; Arginine biosynthesis [PATH:ko00220] Metabolism; Metabolism of other amino acids; D-Amino acid metabolism [PATH:ko00470] Environmental Information Processing; Signal transduction; Two-component system [PATH:ko02020…	{WP.022999040.1; COG2066 Glutaminase E Amino acid transport and metabolism ;}	{NA}	{GO:0004359; glutaminase activity; molecular_function GO:0006541; glutamine metabolic process; biological_process}	{NA}	{NA}	{NA}	{NA}	{NA}	{false}	{NA}	{PF04960:Glutaminase}
MAR44G.1_GM000205	{Scaffold1:236076:236474:+}	{WP_040451324.1; succinate dehydrogenase, cytochrome b556 subunit [Roseibium alexandrii]}	{Q59659; Succinate dehydrogenase cytochrome b556 subunit }	{labp:FJ695_01905; K00241 sdhC, frdC succinate dehydrogenase cytochrome b subunit -- Metabolism; Carbohydrate metabolism; Citrate cycle (TCA cycle) [PATH:ko00020] Metabolism; Carbohydrate metabolism; Butanoate metabolism [PATH:ko00650] Metabolism; Energy metabolism; Oxidative phosphorylation [PATH:ko00190] Metabolism; Energy metabolism; Carbon fixation pathways in prokaryotes [PATH:ko00720]}	{WP.077291011.1; COG2009 Succinate dehydrogenase/fumarate reductase, cytochrome b subunit C Energy production and conversion ;}	{NA}	{GO:0016627; oxidoreductase activity, acting on the CH-CH group of donors; molecular_function}	{NA}	{NA}	{NA}	{NA}	{NA}	{false}	{NA}	{PF01127:Succinate dehydrogenase/Fumarate reductase transmembrane subunit}
MAR44G.1_GM000206	{Scaffold1:236485:236868:+}	{WP_008195546.1; succinate dehydrogenase, hydrophobic membrane anchor protein [Roseibium alexandrii]}	{NA}	{labp:FJ695_01900; K00242 sdhD, frdD succinate dehydrogenase membrane anchor subunit -- Metabolism; Carbohydrate metabolism; Citrate cycle (TCA cycle) [PATH:ko00020] Metabolism; Carbohydrate metabolism; Butanoate metabolism [PATH:ko00650] Metabolism; Energy metabolism; Oxidative phosphorylation [PATH:ko00190] Metabolism; Energy metabolism; Carbon fixation pathways in prokaryotes [PATH:ko00720]}	{WP.077291010.1; COG2142 Succinate dehydrogenase, hydrophobic anchor subunit C Energy production and conversion ;}	{NA}	{GO:0005740; mitochondrial envelope; cellular_component GO:0016020; membrane; cellular_component GO:0016627; oxidoreductase activity, acting on the CH-CH group of donors; molecular_function GO:0016021; integral to membrane; cellular_component}	{NA}	{NA}	{NA}	{NA}	{NA}	{false}	{NA}	{PF05328:CybS, succinate dehydrogenase cytochrome B small subunit PF01127:Succinate dehydrogenase/Fumarate reductase transmembrane subunit PF02300:Fumarate reductase subunit C}
MAR44G.1_GM000207	{Scaffold1:236874:238700:+}	{WP_055672366.1; succinate dehydrogenase flavoprotein subunit [Roseibium alexandrii]}	{Q59661; Succinate dehydrogenase flavoprotein subunit }	{labt:FIU93_03560; K00239 sdhA, frdA succinate dehydrogenase flavoprotein subunit 1.3.5.1 Metabolism; Carbohydrate metabolism; Citrate cycle (TCA cycle) [PATH:ko00020] Metabolism; Carbohydrate metabolism; Butanoate metabolism [PATH:ko00650] Metabolism; Energy metabolism; Oxidative phosphorylation [PATH:ko00190] Metabolism; Energy metabolism; Carbon fixation pathways in prokaryotes [PATH:ko00720] …	{WP.077291009.1; COG1053 Succinate dehydrogenase/fumarate reductase, flavoprotein subunit C Energy production and conversion ;}	{gnl|TC-DB|X5H3P0; 3.D.10.1.6 Succinate dehydrogenase flavoprotein subunit OS=Neorickettsia helminthoeca str. Oregon GN=sdhA PE=3 SV=1}	{GO:0050660; flavin adenine dinucleotide binding; molecular_function GO:0055114; oxidation-reduction process; biological_process GO:0016491; oxidoreductase activity; molecular_function GO:0008033; tRNA processing; biological_process}	{PHI:4966; F9WWR1 sdi1 1047171 Zymoseptoria tritici septoria tritici blotch Triticum aestivum (related: bread wheat) Succinate dehydrogenase Gene disruption unaffected pathogenicity}	{NA}	{NA}	{NA}	{NA}	{false}	{NA}	{PF01266:FAD dependent oxidoreductase PF01134:Glucose inhibited division protein A PF02910:Fumarate reductase flavoprotein C-term PF07992:Pyridine nucleotide-disulphide oxidoreductase}
MAR44G.1_GM000208	{Scaffold1:238721:239611:+}	{WP_055672367.1; FkbM family methyltransferase [Roseibium alexandrii]}	{NA}	{NA}	{WP.022999036.1; COG2242 Precorrin-6B methylase 2 H Coenzyme transport and metabolism ;}	{NA}	{GO:0008152; NA GO:0008168; methyltransferase activity; molecular_function GO:0018024; histone-lysine N-methyltransferase activity; molecular_function GO:0008173; RNA methyltransferase activity; molecular_function GO:0016740; transferase activity; molecular_function GO:0006396; RNA processing; biological_process}	{NA}	{NA}	{NA}	{NA}	{NA}	{false}	{NA}	{PF08123:Histone methylation protein DOT1 PF02475:Met-10+ like-protein PF05958:tRNA (Uracil-5-)-methyltransferase PF08241:Methyltransferase domain}
MAR44G.1_GM000209	{Scaffold1:239608:240453:+}	{WP_008196458.1; FkbM family methyltransferase [Roseibium alexandrii]}	{NA}	{NA}	{WP.022999036.1; COG2242 Precorrin-6B methylase 2 H Coenzyme transport and metabolism ;}	{NA}	{GO:0008176; tRNA (guanine-N7-)-methyltransferase activity; molecular_function GO:0008168; methyltransferase activity; molecular_function GO:0006396; RNA processing; biological_process GO:0008173; RNA methyltransferase activity; molecular_function GO:0016740; transferase activity; molecular_function GO:0006400; tRNA modification; biological_process}	{NA}	{NA}	{NA}	{NA}	{NA}	{false}	{NA}	{PF02390:Putative methyltransferase PF02475:Met-10+ like-protein PF05958:tRNA (Uracil-5-)-methyltransferase PF05175:Methyltransferase small domain}
MAR44G.1_GM000210	{Scaffold1:240522:241304:+}	{WP_008189735.1; succinate dehydrogenase iron-sulfur subunit [Roseibium alexandrii]}	{Q59662; Succinate dehydrogenase iron-sulfur subunit }	{labp:FJ695_01885; K00240 sdhB, frdB succinate dehydrogenase iron-sulfur subunit 1.3.5.1 Metabolism; Carbohydrate metabolism; Citrate cycle (TCA cycle) [PATH:ko00020] Metabolism; Carbohydrate metabolism; Butanoate metabolism [PATH:ko00650] Metabolism; Energy metabolism; Oxidative phosphorylation [PATH:ko00190] Metabolism; Energy metabolism; Carbon fixation pathways in prokaryotes [PATH:ko00720]}	{WP.031268685.1; COG0479 Succinate dehydrogenase/fumarate reductase, Fe-S protein subunit C Energy production and conversion ;}	{gnl|TC-DB|P21912; 3.D.10.1.7 Succinate dehydrogenase [ubiquinone] iron-sulfur subunit, mitochondrial OS=Homo sapiens OX=9606 GN=SDHB PE=1 SV=3}	{GO:0051536; iron-sulfur cluster binding; molecular_function GO:0009055; NA}	{PHI:822; O42772 Ip 1047171 Zymoseptoria tritici septoria leaf blotch Triticum (related: wheat) succinate dehydrogenase subunit Gene mutation: characterised; gene complementation chemistry target: resistance to chemical}	{NA}	{NA}	{NA}	{NA}	{false}	{WAF75216.1_; GT51 murein polymerase (EC 2.4.1.129). }	{PF13746:4Fe-4S dicluster domain PF12838:4Fe-4S dicluster domain PF00111:2Fe-2S iron-sulfur cluster binding domain PF13187:4Fe-4S dicluster domain PF13183:4Fe-4S dicluster domain PF13085:2Fe-2S iron-sulfur cluster binding domain PF13237:4Fe-4S dicluster domain}
MAR44G.1_GM000211	{Scaffold1:241797:242309:+}	{WP_008193018.1; Hcp family type VI secretion system effector [Roseibium alexandrii]}	{Q9HI36; Major exported protein }	{labr:CHH27_10215; K11903 hcp type VI secretion system secreted protein Hcp -- Environmental Information Processing; Membrane transport; Bacterial secretion system [PATH:ko03070] Cellular Processes; Cellular community - prokaryotes; Biofilm formation - Pseudomonas aeruginosa [PATH:ko02025]}	{NP.248954.1; COG3157 Type VI protein secretion system component Hcp (secreted cytotoxin) U Intracellular trafficking, secretion, and vesicular transport ;}	{gnl|TC-DB|R9TLR6; 3.A.23.3.1 Secreted protein Hcp OS=Campylobacter jejuni GN=hcpA_2 PE=4 SV=1}	{NA}	{PHI:8554; A0A0G3K3H0 hcp2 562 Escherichia coli avian colibacillosis Gallus gallus (related: chicken) Hemolysin co-regulation protein Gene deletion: full; gene complementation reduced virulence}	{VFG051502; VF0943 HSI-2 hcpA Hcp family type VI secretion system effector P. aeruginosa encodes three distinct T6SS loci, H1- to H3-T6SS. While H1-T6SS has only been involved in antibacterial activity so far, H2-T6SS and H3-T6SS can target both bacterial and eukaryotic cells possessing even as said earlier trans-kingdom effectors. nan The effectors PldA and PldB of Pseudomonas aeruginosa H2-T6SS…	{NA}	{NA}	{NA}	{true}	{NA}	{NA}
MAR44G.1_GM000212	{Scaffold1:242459:242695:-}	{WP_055672368.1; hypothetical protein [Roseibium alexandrii]}	{NA}	{NA}	{NA}	{NA}	{NA}	{NA}	{NA}	{NA}	{NA}	{NA}	{false}	{NA}	{NA}
MAR44G.1_GM000213	{Scaffold1:242775:244082:-}	{WP_055672369.1; HAMP domain-containing sensor histidine kinase [Roseibium alexandrii]}	{NA}	{NA}	{WP.024097515.1; COG0642 Signal transduction histidine kinase T Signal transduction mechanisms ;}	{NA}	{GO:0016021; integral to membrane; cellular_component GO:0006605; protein targeting; biological_process GO:0000155; two-component sensor activity; molecular_function GO:0009512; cytochrome b6f complex; cellular_component GO:0007165; signal transduction; biological_process GO:0005524; ATP binding; molecular_function GO:0006886; intracellular protein transport; biological_process GO:0016020; membra…	{NA}	{NA}	{NA}	{NA}	{NA}	{false}	{NA}	{PF00512:His Kinase A (phospho-acceptor) domain PF08041:PetM family of cytochrome b6f complex subunit 7 PF00672:HAMP domain PF02518:Histidine kinase-, DNA gyrase B-, and HSP90-like ATPase PF00584:SecE/Sec61-gamma subunits of protein translocation complex}
MAR44G.1_GM000214	{Scaffold1:244066:244749:-}	{WP_055672370.1; response regulator transcription factor [Roseibium alexandrii]}	{Q02540; Transcriptional activator protein CopR }	{otm:OSB_05680; K02483 K02483 two-component system, OmpR family, response regulator -- --}	{WP.013950057.1; COG0745 DNA-binding response regulator, OmpR family, contains REC and winged-helix (wHTH) domain TK Signal transduction mechanisms ; Transcription ;}	{NA}	{GO:0006355; regulation of transcription, DNA-dependent; biological_process GO:0000160; two-component signal transduction system (phosphorelay); biological_process GO:0000156; two-component response regulator activity; molecular_function GO:0003677; DNA binding; molecular_function}	{PHI:5423; Q8YG33 BMEI1329 29459 Brucella melitensis ovine brucellosis Mus musculus (related: house mouse) Two-component response regulator Gene deletion: full; gene complementation reduced virulence}	{VFG027229; VF0298 MprAB mprA response regulator transcription factor MprB, sensor kinase, can undergo autophosphorylation. MprA, transcriptional factor, can accept phosphate from MprB or from small phosphodonors including acetyl phosphate nan Required for establishment and maintenance of persistent infection nan}	{NA}	{ARO:3002922, ARO:3000816, ARO:3002924, ARO:3002925, ARO:3002928, ARO:3002921, ARO:3000838; vanRC, mtrA, vanRE, vanRF, vanRM, vanRB, arlR 126.716, 117.087, 114.39, 116.701, 119.013, 127.872, 125.176 antibiotic resistance gene cluster, cassette, or operon, determinant of resistance to glycopeptide antibiotics, efflux pump complex or subunit conferring antibiotic resistance, protein(s) and two-comp…	{NA}	{false}	{NA}	{PF00486:Transcriptional regulatory protein, C terminal PF00072:Response regulator receiver domain}
MAR44G.1_GM000215	{Scaffold1:244838:245179:-}	{WP_008193174.1; PepSY domain-containing protein [Roseibium alexandrii]}	{NA}	{NA}	{WP.011747956.1; COG3212 PepSY domain containing protein, regulator of zincin peptidase activity O Posttranslational modification, protein turnover, chaperones ;}	{NA}	{NA}	{NA}	{NA}	{NA}	{NA}	{NA}	{false}	{NA}	{NA}
MAR44G.1_GM000216	{Scaffold1:245322:246299:-}	{WP_055672430.1; DUF808 domain-containing protein [Roseibium alexandrii]}	{NA}	{labp:FJ695_01845; K09781 K09781 uncharacterized protein -- --}	{WP.023003997.1; COG2354 Membrane protein MutK/YedI, may be involved in DNA repair L Replication, recombination and repair ;}	{NA}	{GO:0019012; NA GO:0048037; cofactor binding; molecular_function GO:0030683; evasion by virus of host immune response; biological_process}	{NA}	{NA}	{NA}	{NA}	{NA}	{false}	{CAD7255253.1_; GT9 lipopolysaccharide N-acetylglucosaminyltransferase (EC 2.4.1.56); heptosyltransferase (EC 2.4.-.-). }	{PF01567:Hantavirus glycoprotein G1 PF02629:CoA binding domain}
MAR44G.1_GM000217	{Scaffold1:246541:248238:+}	{WP_055672372.1; cache domain-containing protein [Roseibium alexandrii]}	{NA}	{brn:D1F64_01295; K03406 mcp methyl-accepting chemotaxis protein -- Environmental Information Processing; Signal transduction; Two-component system [PATH:ko02020] Cellular Processes; Cell motility; Bacterial chemotaxis [PATH:ko02030]}	{WP.117410946.1; COG4564 Signal transduction histidine kinase T Signal transduction mechanisms ;}	{NA}	{GO:0043190; ATP-binding cassette (ABC) transporter complex; cellular_component GO:0006810; transport; biological_process GO:0016020; membrane; cellular_component GO:0016820; hydrolase activity, acting on acid anhydrides, catalyzing transmembrane movement of substances; molecular_function GO:0030334; regulation of cell migration; biological_process GO:0005524; ATP binding; molecular_function GO:0…	{NA}	{NA}	{NA}	{NA}	{NA}	{false}	{NA}	{PF10473:Leucine-rich repeats of kinetochore protein Cenp-F/LEK1 PF06008:Laminin Domain I PF00015:Methyl-accepting chemotaxis protein (MCP) signalling domain PF06009:Laminin Domain II PF00672:HAMP domain PF08402:TOBE domain PF00126:Bacterial regulatory helix-turn-helix protein, lysR family}
MAR44G.1_GM000218	{Scaffold1:248323:249534:-}	{CTQ71514.1; Putrescine oxidase [Roseibium alexandrii]}	{NA}	{amv:ACMV_22140; K00274 MAO, aofH monoamine oxidase 1.4.3.4 Metabolism; Amino acid metabolism; Glycine, serine and threonine metabolism [PATH:ko00260] Metabolism; Amino acid metabolism; Arginine and proline metabolism [PATH:ko00330] Metabolism; Amino acid metabolism; Histidine metabolism [PATH:ko00340] Metabolism; Amino acid metabolism; Tyrosine metabolism [PATH:ko00350] Metabolism; Amino acid me…	{WP.013640469.1; COG1231 Monoamine oxidase E Amino acid transport and metabolism ;}	{NA}	{GO:0050660; flavin adenine dinucleotide binding; molecular_function GO:0055114; oxidation-reduction process; biological_process GO:0016491; oxidoreductase activity; molecular_function}	{NA}	{NA}	{NA}	{NA}	{NA}	{false}	{NA}	{PF01593:Flavin containing amine oxidoreductase PF07992:Pyridine nucleotide-disulphide oxidoreductase PF01266:FAD dependent oxidoreductase PF00070:Pyridine nucleotide-disulphide oxidoreductase}
MAR44G.1_GM000219	{Scaffold1:249712:249912:+}	{WP_055672373.1; hypothetical protein [Roseibium alexandrii]}	{NA}	{NA}	{NA}	{NA}	{NA}	{NA}	{NA}	{NA}	{NA}	{NA}	{true}	{NA}	{NA}
MAR44G.1_GM000220	{Scaffold1:250012:250563:-}	{WP_055672432.1; hypothetical protein [Roseibium alexandrii]}	{NA}	{NA}	{NA}	{NA}	{NA}	{NA}	{NA}	{NA}	{NA}	{NA}	{false}	{NA}	{NA}
MAR44G.1_GM000221	{Scaffold1:250764:252254:-}	{WP_055672374.1; amino acid permease [Roseibium alexandrii]}	{NA}	{labp:FJ695_01830; K20265 gadC glutamate:GABA antiporter -- Cellular Processes; Cellular community - prokaryotes; Quorum sensing [PATH:ko02024]}	{WP.011526344.1; COG0531 Serine transporter YbeC, amino acid:H+ symporter family E Amino acid transport and metabolism ;}	{NA}	{GO:0003333; amino acid transmembrane transport; biological_process GO:0055085; transmembrane transport; biological_process GO:0015171; amino acid transmembrane transporter activity; molecular_function GO:0016020; membrane; cellular_component GO:0006810; transport; biological_process}	{NA}	{NA}	{NA}	{NA}	{NA}	{false}	{NA}	{PF13520:Amino acid permease PF00324:Amino acid permease}
MAR44G.1_GM000222	{Scaffold1:252259:253647:-}	{CTQ71526.1; Glutamate decarboxylase beta [Roseibium alexandrii]}	{Q5E5Y7; Glutamate decarboxylase }	{labp:FJ695_01825; K01580 E4.1.1.15, gadB, gadA, GAD glutamate decarboxylase 4.1.1.15 Metabolism; Carbohydrate metabolism; Butanoate metabolism [PATH:ko00650] Metabolism; Amino acid metabolism; Alanine, aspartate and glutamate metabolism [PATH:ko00250] Metabolism; Metabolism of other amino acids; beta-Alanine metabolism [PATH:ko00410] Metabolism; Metabolism of other amino acids; Taurine and hypot…	{WP.106420009.1; COG0076 Glutamate or tyrosine decarboxylase or a related PLP-dependent protein E Amino acid transport and metabolism ;}	{NA}	{GO:0019752; carboxylic acid metabolic process; biological_process GO:0008152; NA GO:0030170; pyridoxal phosphate binding; molecular_function GO:0016831; carboxy-lyase activity; molecular_function}	{NA}	{NA}	{NA}	{NA}	{NA}	{false}	{NA}	{PF00266:Aminotransferase class-V PF00282:Pyridoxal-dependent decarboxylase conserved domain}
MAR44G.1_GM000223	{Scaffold1:253884:254669:-}	{WP_055672376.1; methyltransferase domain-containing protein [Roseibium alexandrii]}	{NA}	{NA}	{WP.077293204.1; COG2227 2-polyprenyl-3-methyl-5-hydroxy-6-metoxy-1,4-benzoquinol methylase H Coenzyme transport and metabolism ;}	{NA}	{GO:0008152; NA GO:0008168; methyltransferase activity; molecular_function}	{NA}	{NA}	{NA}	{NA}	{NA}	{true}	{NA}	{PF08241:Methyltransferase domain}
MAR44G.1_GM000224	{Scaffold1:254666:255841:-}	{WP_208981351.1; hypothetical protein [Roseibium alexandrii]}	{NA}	{labp:FJ695_01815; K01251 AHCY, ahcY adenosylhomocysteinase 3.13.2.1 Metabolism; Amino acid metabolism; Cysteine and methionine metabolism [PATH:ko00270]}	{WP.077291008.1; COG0499 S-adenosylhomocysteine hydrolase H Coenzyme transport and metabolism ;}	{NA}	{GO:0048037; cofactor binding; molecular_function GO:0006813; potassium ion transport; biological_process GO:0016491; oxidoreductase activity; molecular_function GO:0006631; fatty acid metabolic process; biological_process GO:0003857; 3-hydroxyacyl-CoA dehydrogenase activity; molecular_function GO:0050661; NADP binding; molecular_function GO:0016616; oxidoreductase activity, acting on the CH-OH g…	{NA}	{NA}	{NA}	{NA}	{NA}	{false}	{NA}	{PF02826:D-isomer specific 2-hydroxyacid dehydrogenase, NAD binding domain PF03447:Homoserine dehydrogenase, NAD binding domain PF02254:TrkA-N domain PF02737:3-hydroxyacyl-CoA dehydrogenase, NAD binding domain}
MAR44G.1_GM000225	{Scaffold1:256388:257785:+}	{WP_055672378.1; cell envelope integrity protein CreD [Roseibium alexandrii]}	{NA}	{labp:FJ695_01810; K06143 creD inner membrane protein -- --}	{WP.077291007.1; COG4452 Inner membrane protein CreD involved in colicin E2 resistance V Defense mechanisms ;}	{NA}	{NA}	{NA}	{NA}	{NA}	{NA}	{NA}	{true}	{NA}	{NA}
MAR44G.1_GM000226	{Scaffold1:257985:258629:+}	{WP_008194147.1; peptide-methionine (S)-S-oxide reductase MsrA [Roseibium alexandrii]}	{Q92LI5; Peptide methionine sulfoxide reductase MsrA 2 }	{labp:FJ695_01805; K07304 msrA peptide-methionine (S)-S-oxide reductase 1.8.4.11 --}	{WP.077291005.1; COG0225 Peptide methionine sulfoxide reductase MsrA O Posttranslational modification, protein turnover, chaperones ;}	{NA}	{GO:0055114; oxidation-reduction process; biological_process GO:0008113; peptide-methionine-(S)-S-oxide reductase activity; molecular_function}	{PHI:4580; P0A086 msrA2 1280 Staphylococcus aureus skin infection; food poisoning; respiratory disease Mus musculus (related: house mouse) Methionine Sulfoxide Reductase Gene mutation; gene complementation reduced virulence}	{NA}	{NA}	{NA}	{YES}	{false}	{NA}	{PF01625:Peptide methionine sulfoxide reductase}
MAR44G.1_GM000227	{Scaffold1:258664:260553:-}	{WP_055672380.1; DNA helicase RecQ [Roseibium alexandrii]}	{P15043; ATP-dependent DNA helicase RecQ }	{labp:FJ695_01800; K03654 recQ ATP-dependent DNA helicase RecQ 5.6.2.4 Genetic Information Processing; Folding, sorting and degradation; RNA degradation [PATH:ko03018]}	{WP.022999026.1; COG0514 Superfamily II DNA helicase RecQ L Replication, recombination and repair ;}	{NA}	{GO:0003676; nucleic acid binding; molecular_function GO:0005524; ATP binding; molecular_function GO:0006260; DNA replication; biological_process GO:0005622; intracellular; cellular_component GO:0006281; DNA repair; biological_process GO:0004386; helicase activity; molecular_function GO:0043140; ATP-dependent 3'-5' DNA helicase activity; molecular_function GO:0008026; ATP-dependent helicase activ…	{NA}	{NA}	{NA}	{NA}	{NA}	{true}	{NA}	{PF00570:HRDC domain PF09382:RQC domain PF00271:Helicase conserved C-terminal domain PF00270:DEAD/DEAH box helicase}
MAR44G.1_GM000228	{Scaffold1:260652:261551:-}	{WP_008193966.1; 1-acyl-sn-glycerol-3-phosphate acyltransferase [Roseibium alexandrii]}	{NA}	{NA}	{WP.022999025.1; COG3176 Putative hemolysin R General function prediction only ;}	{NA}	{GO:0016746; transferase activity, transferring acyl groups; molecular_function GO:0008152; NA}	{NA}	{NA}	{NA}	{NA}	{NA}	{false}	{NA}	{PF01553:Acyltransferase}
MAR44G.1_GM000229	{Scaffold1:261668:262084:-}	{WP_082429084.1; MAPEG family protein [Roseibium alexandrii]}	{NA}	{NA}	{WP.022999024.1; COG3686 Uncharacterized conserved protein, MAPEG superfamily S Function unknown ;}	{NA}	{NA}	{NA}	{NA}	{NA}	{NA}	{NA}	{false}	{NA}	{NA}
MAR44G.1_GM000230	{Scaffold1:262172:262546:+}	{WP_008192225.1; carboxymuconolactone decarboxylase family protein [Roseibium alexandrii]}	{NA}	{NA}	{WP.013654957.1; COG0599 Uncharacterized conserved protein YurZ, alkylhydroperoxidase/carboxymuconolactone decarboxylase family R General function prediction only ;}	{NA}	{GO:0055114; oxidation-reduction process; biological_process GO:0051920; peroxiredoxin activity; molecular_function}	{NA}	{NA}	{NA}	{NA}	{NA}	{false}	{NA}	{PF02627:Carboxymuconolactone decarboxylase family}
MAR44G.1_GM000231	{Scaffold1:262734:263135:+}	{WP_208981352.1; hypothetical protein [Roseibium alexandrii]}	{NA}	{labp:FJ695_01780; K03741 arsC arsenate reductase (thioredoxin) 1.20.4.4 --}	{WP.077291004.1; COG0394 Protein-tyrosine-phosphatase T Signal transduction mechanisms ;}	{NA}	{NA}	{NA}	{NA}	{NA}	{NA}	{NA}	{false}	{NA}	{NA}
MAR44G.1_GM000232	{Scaffold1:263235:263768:+}	{OJJ12721.1; hypothetical protein BKI51_01110 [Alphaproteobacteria bacterium AO1-B]}	{NA}	{NA}	{NA}	{NA}	{NA}	{NA}	{NA}	{NA}	{NA}	{YES}	{false}	{NA}	{NA}
MAR44G.1_GM000233	{Scaffold1:263842:264627:+}	{WP_055672384.1; hypothetical protein [Roseibium alexandrii]}	{NA}	{NA}	{NA}	{NA}	{NA}	{NA}	{NA}	{NA}	{NA}	{NA}	{false}	{NA}	{NA}
MAR44G.1_GM000234	{Scaffold1:264905:266095:+}	{EEE46287.2; putative ATPase [Roseibium alexandrii DFL-11]}	{Q3V384; AFG1-like ATPase }	{labp:FJ695_01755; K06916 zapE cell division protein ZapE -- --}	{WP.031268680.1; COG1485 Cell division protein ZapE (Z ring-associated ATPase), AFG1 superfamily D Cell cycle control, cell division, chromosome partitioning ;}	{NA}	{GO:0005524; ATP binding; molecular_function}	{NA}	{NA}	{NA}	{NA}	{NA}	{false}	{NA}	{PF03969:AFG1-like ATPase}
MAR44G.1_GM000235	{Scaffold1:266269:267231:+}	{WP_055672386.1; malate dehydrogenase [Roseibium alexandrii]}	{B9JTS9; Malate dehydrogenase }	{labr:CHH27_21910; K00024 mdh malate dehydrogenase 1.1.1.37 Metabolism; Carbohydrate metabolism; Citrate cycle (TCA cycle) [PATH:ko00020] Metabolism; Carbohydrate metabolism; Pyruvate metabolism [PATH:ko00620] Metabolism; Carbohydrate metabolism; Glyoxylate and dicarboxylate metabolism [PATH:ko00630] Metabolism; Energy metabolism; Carbon fixation in photosynthetic organisms [PATH:ko00710] Metabol…	{WP.022999018.1; COG0039 Malate/lactate dehydrogenase C Energy production and conversion ;}	{NA}	{GO:0016616; oxidoreductase activity, acting on the CH-OH group of donors, NAD or NADP as acceptor; molecular_function GO:0005975; carbohydrate metabolic process; biological_process GO:0004553; hydrolase activity, hydrolyzing O-glycosyl compounds; molecular_function GO:0055114; oxidation-reduction process; biological_process GO:0016491; oxidoreductase activity; molecular_function}	{NA}	{NA}	{NA}	{NA}	{NA}	{false}	{NA}	{PF02866:lactate/malate dehydrogenase, alpha/beta C-terminal domain PF02056:Family 4 glycosyl hydrolase PF00056:lactate/malate dehydrogenase, NAD binding domain}
MAR44G.1_GM000236	{Scaffold1:267302:268501:+}	{WP_055672387.1; ADP-forming succinate--CoA ligase subunit beta [Roseibium alexandrii]}	{B9JTS8; Succinate--CoA ligase [ADP-forming] subunit beta }	{labp:FJ695_01745; K01903 sucC succinyl-CoA synthetase beta subunit 6.2.1.5 Metabolism; Carbohydrate metabolism; Citrate cycle (TCA cycle) [PATH:ko00020] Metabolism; Carbohydrate metabolism; Propanoate metabolism [PATH:ko00640] Metabolism; Carbohydrate metabolism; C5-Branched dibasic acid metabolism [PATH:ko00660] Metabolism; Energy metabolism; Carbon fixation pathways in prokaryotes [PATH:ko0072…	{WP.077291001.1; COG0045 Succinyl-CoA synthetase, beta subunit C Energy production and conversion ;}	{NA}	{GO:0008152; NA GO:0005524; ATP binding; molecular_function GO:0003824; NA}	{NA}	{NA}	{NA}	{NA}	{NA}	{false}	{NA}	{PF00549:CoA-ligase PF02786:Carbamoyl-phosphate synthase L chain, ATP binding domain}
MAR44G.1_GM000237	{Scaffold1:268502:269410:+}	{WP_040451332.1; succinate--CoA ligase subunit alpha [Roseibium alexandrii]}	{Q94522; Succinate--CoA ligase [ADP/GDP-forming] subunit alpha, mitochondrial }	{labp:FJ695_01740; K01902 sucD succinyl-CoA synthetase alpha subunit 6.2.1.5 Metabolism; Carbohydrate metabolism; Citrate cycle (TCA cycle) [PATH:ko00020] Metabolism; Carbohydrate metabolism; Propanoate metabolism [PATH:ko00640] Metabolism; Carbohydrate metabolism; C5-Branched dibasic acid metabolism [PATH:ko00660] Metabolism; Energy metabolism; Carbon fixation pathways in prokaryotes [PATH:ko007…	{WP.077291000.1; COG0074 Succinyl-CoA synthetase, alpha subunit C Energy production and conversion ;}	{NA}	{GO:0009089; lysine biosynthetic process via diaminopimelate; biological_process GO:0008839; dihydrodipicolinate reductase activity; molecular_function GO:0055114; oxidation-reduction process; biological_process GO:0008152; NA GO:0048037; cofactor binding; molecular_function GO:0003824; NA}	{NA}	{NA}	{NA}	{NA}	{NA}	{false}	{NA}	{PF01113:Dihydrodipicolinate reductase, N-terminus PF00549:CoA-ligase PF13380:CoA binding domain PF02629:CoA binding domain}
MAR44G.1_GM000238	{Scaffold1:269630:272617:+}	{WP_008191149.1; 2-oxoglutarate dehydrogenase E1 component [Roseibium alexandrii]}	{A6WXF0; 2-oxoglutarate dehydrogenase E1 component }	{labp:FJ695_01735; K00164 OGDH, sucA 2-oxoglutarate dehydrogenase E1 component 1.2.4.2 Metabolism; Carbohydrate metabolism; Citrate cycle (TCA cycle) [PATH:ko00020]}	{WP.022999014.1; COG0567 2-oxoglutarate dehydrogenase complex, dehydrogenase (E1) component, and related enzymes C Energy production and conversion ;}	{NA}	{GO:0016624; oxidoreductase activity, acting on the aldehyde or oxo group of donors, disulfide as acceptor; molecular_function GO:0008152; NA}	{PHI:9378; G2XIN6 VdOGDH (VDAG_10018) 27337 Verticillium dahliae vascular wilt Gossypium hirsutum (related: cotton) Alpha-oxoglutarate dehydrogenase Gene deletion: full; gene complementation reduced virulence}	{NA}	{NA}	{NA}	{NA}	{false}	{NA}	{PF00676:Dehydrogenase E1 component}
MAR44G.1_GM000239	{Scaffold1:272681:274192:+}	{WP_055672388.1; 2-oxoglutarate dehydrogenase complex dihydrolipoyllysine-residue succinyltransferase [Roseibium alexandrii]}	{Q8GCY1; Dihydrolipoyllysine-residue succinyltransferase component of 2-oxoglutarate dehydrogenase complex }	{labr:CHH27_21935; K00658 DLST, sucB 2-oxoglutarate dehydrogenase E2 component (dihydrolipoamide succinyltransferase) 2.3.1.61 Metabolism; Carbohydrate metabolism; Citrate cycle (TCA cycle) [PATH:ko00020] Metabolism; Amino acid metabolism; Lysine degradation [PATH:ko00310] Metabolism; Amino acid metabolism; Tryptophan metabolism [PATH:ko00380]}	{WP.013654945.1; COG0508 Pyruvate/2-oxoglutarate dehydrogenase complex, dihydrolipoamide acyltransferase (E2) component C Energy production and conversion ;}	{NA}	{GO:0055114; oxidation-reduction process; biological_process GO:0006546; glycine catabolic process; biological_process GO:0005960; glycine cleavage complex; cellular_component GO:0006213; pyrimidine nucleoside metabolic process; biological_process GO:0006814; sodium ion transport; biological_process GO:0016655; oxidoreductase activity, acting on NADH or NADPH, quinone or similar compound as accep…	{PHI:7353; Q2FH26 odhB 1280 Staphylococcus aureus skin infection; food poisoning; respiratory disease Danio rerio (related: zebrafish) Dihydrolipoamide succinyltransferase Gene mutation unaffected pathogenicity}	{NA}	{NA}	{NA}	{NA}	{false}	{NA}	{PF05111:Ameloblastin precursor (Amelin) PF02817:e3 binding domain PF01597:Glycine cleavage H-protein PF00198:2-oxoacid dehydrogenases acyltransferase (catalytic domain) PF05896:Na(+)-translocating NADH-quinone reductase subunit A (NQRA) PF07831:Pyrimidine nucleoside phosphorylase C-terminal domain PF00358:phosphoenolpyruvate-dependent sugar phosphotransferase system, EIIA 1}
MAR44G.1_GM000240	{Scaffold1:274233:274847:+}	{WP_055672389.1; LysE family translocator [Roseibium alexandrii]}	{NA}	{NA}	{WP.022999012.1; COG1280 Threonine/homoserine/homoserine lactone efflux protein E Amino acid transport and metabolism ;}	{NA}	{GO:0016021; integral to membrane; cellular_component GO:0016020; membrane; cellular_component GO:0006865; amino acid transport; biological_process}	{NA}	{NA}	{NA}	{NA}	{NA}	{false}	{NA}	{PF01810:LysE type translocator PF13903:PMP-22/EMP/MP20/Claudin tight junction PF03741:Integral membrane protein TerC family}
MAR44G.1_GM000241	{Scaffold1:274954:276357:+}	{WP_055672390.1; dihydrolipoyl dehydrogenase [Roseibium alexandrii]}	{P31023; Dihydrolipoyl dehydrogenase, mitochondrial }	{labp:FJ695_01715; K00382 DLD, lpd, pdhD dihydrolipoamide dehydrogenase 1.8.1.4 Metabolism; Carbohydrate metabolism; Glycolysis / Gluconeogenesis [PATH:ko00010] Metabolism; Carbohydrate metabolism; Citrate cycle (TCA cycle) [PATH:ko00020] Metabolism; Carbohydrate metabolism; Pyruvate metabolism [PATH:ko00620] Metabolism; Carbohydrate metabolism; Glyoxylate and dicarboxylate metabolism [PATH:ko006…	{WP.031268678.1; COG1249 Dihydrolipoamide dehydrogenase (E3) component of pyruvate/2-oxoglutarate dehydrogenase complex or glutathione oxidoreductase C Energy production and conversion ;}	{NA}	{GO:0045454; cell redox homeostasis; biological_process GO:0016491; oxidoreductase activity; molecular_function GO:0006631; fatty acid metabolic process; biological_process GO:0016117; carotenoid biosynthetic process; biological_process GO:0050660; flavin adenine dinucleotide binding; molecular_function GO:0003857; 3-hydroxyacyl-CoA dehydrogenase activity; molecular_function GO:0016705; oxidoredu…	{PHI:6520; Q5ZVD8 LpdA 446 Legionella pneumophila legionnaires' disease Mus musculus (related: house mouse) Effector (plant avirulence determinant) Gene deletion: full effector (plant avirulence determinant)}	{NA}	{NA}	{NA}	{NA}	{false}	{NA}	{PF01134:Glucose inhibited division protein A PF00070:Pyridine nucleotide-disulphide oxidoreductase PF02852:Pyridine nucleotide-disulphide oxidoreductase, dimerisation domain PF01266:FAD dependent oxidoreductase PF07992:Pyridine nucleotide-disulphide oxidoreductase PF05834:Lycopene cyclase protein PF02737:3-hydroxyacyl-CoA dehydrogenase, NAD binding domain}
MAR44G.1_GM000242	{Scaffold1:276423:276779:-}	{WP_008193532.1; DoxX family protein [Roseibium alexandrii]}	{NA}	{NA}	{NA}	{NA}	{NA}	{NA}	{NA}	{NA}	{NA}	{NA}	{false}	{NA}	{NA}
MAR44G.1_GM000243	{Scaffold1:276852:277421:-}	{WP_008189005.1; NAD(P)H-dependent oxidoreductase [Roseibium alexandrii]}	{NA}	{labp:FJ695_01660; K19784 chrR, NQR chromate reductase, NAD(P)H dehydrogenase (quinone) -- --}	{WP.011221990.1; COG0431 NAD(P)H-dependent FMN reductase C Energy production and conversion ;}	{NA}	{GO:0016491; oxidoreductase activity; molecular_function}	{NA}	{NA}	{NA}	{NA}	{NA}	{false}	{NA}	{PF03358:NADPH-dependent FMN reductase}
MAR44G.1_GM000244	{Scaffold1:277541:278422:+}	{WP_008192567.1; LysR family transcriptional regulator [Roseibium alexandrii]}	{NA}	{NA}	{WP.024088443.1; COG0583 DNA-binding transcriptional regulator, LysR family K Transcription ;}	{NA}	{GO:0003677; DNA binding; molecular_function GO:0003700; sequence-specific DNA binding transcription factor activity; molecular_function GO:0006355; regulation of transcription, DNA-dependent; biological_process}	{NA}	{NA}	{NA}	{NA}	{NA}	{false}	{NA}	{PF00126:Bacterial regulatory helix-turn-helix protein, lysR family PF09339:IclR helix-turn-helix domain}
MAR44G.1_GM000245	{Scaffold1:278501:279454:+}	{WP_055672393.1; tyrosine recombinase XerC [Roseibium alexandrii]}	{Q98ED9; Tyrosine recombinase XerC }	{labp:FJ695_01670; K03733 xerC integrase/recombinase XerC -- --}	{WP.075281679.1; COG4974 Site-specific recombinase XerD L Replication, recombination and repair ;}	{NA}	{GO:0006310; DNA recombination; biological_process GO:0003677; DNA binding; molecular_function GO:0015074; DNA integration; biological_process}	{NA}	{NA}	{NA}	{NA}	{NA}	{false}	{NA}	{PF00589:Phage integrase family PF13495:Phage integrase, N-terminal SAM-like domain PF02899:Phage integrase, N-terminal SAM-like domain}
MAR44G.1_GM000246	{Scaffold1:279736:280167:+}	{WP_081450632.1; serine/threonine protein kinase [Roseibium alexandrii]}	{NA}	{NA}	{NA}	{NA}	{NA}	{NA}	{NA}	{NA}	{NA}	{YES}	{false}	{NA}	{NA}
MAR44G.1_GM000247	{Scaffold1:280282:280515:+}	{WP_055672394.1; hypothetical protein [Roseibium alexandrii]}	{NA}	{NA}	{NA}	{NA}	{NA}	{NA}	{NA}	{NA}	{NA}	{NA}	{false}	{NA}	{NA}
MAR44G.1_GM000248	{Scaffold1:280573:281241:-}	{WP_040451337.1; cation transporter [Roseibium alexandrii]}	{NA}	{NA}	{WP.005607839.1; COG1230 Co/Zn/Cd efflux system component P Inorganic ion transport and metabolism ;}	{NA}	{GO:0008324; cation transmembrane transporter activity; molecular_function GO:0055085; transmembrane transport; biological_process GO:0016021; integral to membrane; cellular_component GO:0003677; DNA binding; molecular_function GO:0006812; cation transport; biological_process}	{NA}	{NA}	{NA}	{NA}	{NA}	{false}	{NA}	{PF08361:MAATS-type transcriptional repressor, C-terminal region PF01545:Cation efflux family}
MAR44G.1_GM000249	{Scaffold1:281316:281738:+}	{WP_055672396.1; helix-turn-helix domain-containing protein [Roseibium alexandrii]}	{P0ACS6; HTH-type transcriptional regulator ZntR }	{NA}	{WP.077290996.1; COG0789 DNA-binding transcriptional regulator, MerR family K Transcription ;}	{NA}	{GO:0003677; DNA binding; molecular_function GO:0003700; sequence-specific DNA binding transcription factor activity; molecular_function GO:0006355; regulation of transcription, DNA-dependent; biological_process GO:0043565; sequence-specific DNA binding; molecular_function}	{NA}	{NA}	{NA}	{NA}	{NA}	{false}	{NA}	{PF13411:MerR HTH family regulatory protein PF00376:MerR family regulatory protein PF01022:Bacterial regulatory protein, arsR family PF01381:Helix-turn-helix}
MAR44G.1_GM000250	{Scaffold1:281774:282664:-}	{WP_055672397.1; DUF5996 family protein [Roseibium alexandrii]}	{NA}	{NA}	{WP.019403191.1; COG2388 Predicted acetyltransferase, GNAT superfamily R General function prediction only ;}	{NA}	{NA}	{NA}	{NA}	{NA}	{NA}	{NA}	{false}	{NA}	{NA}
MAR44G.1_GM000251	{Scaffold1:282766:283410:-}	{EEE43952.1; putative flavoprotein [Roseibium alexandrii DFL-11]}	{NA}	{NA}	{WP.011630447.1; COG0431 NAD(P)H-dependent FMN reductase C Energy production and conversion ;}	{NA}	{GO:0016491; oxidoreductase activity; molecular_function}	{NA}	{NA}	{NA}	{NA}	{NA}	{false}	{NA}	{PF03358:NADPH-dependent FMN reductase}
MAR44G.1_GM000252	{Scaffold1:283481:283984:-}	{WP_055672399.1; helix-turn-helix domain-containing protein [Roseibium alexandrii]}	{NA}	{NA}	{WP.014744359.1; COG1733 DNA-binding transcriptional regulator, HxlR family K Transcription ;}	{NA}	{GO:0003700; sequence-specific DNA binding transcription factor activity; molecular_function GO:0005622; intracellular; cellular_component GO:0006355; regulation of transcription, DNA-dependent; biological_process}	{NA}	{NA}	{NA}	{NA}	{NA}	{false}	{NA}	{PF01047:MarR family PF01022:Bacterial regulatory protein, arsR family PF13463:Winged helix DNA-binding domain}
MAR44G.1_GM000253	{Scaffold1:283981:284763:-}	{WP_055672400.1; enoyl-CoA hydratase-related protein [Roseibium alexandrii]}	{NA}	{osg:BST96_15855; K15866 paaG 2-(1,2-epoxy-1,2-dihydrophenyl)acetyl-CoA isomerase 5.3.3.18 Metabolism; Amino acid metabolism; Phenylalanine metabolism [PATH:ko00360]}	{WP.085759633.1; COG1024 Enoyl-CoA hydratase/carnithine racemase I Lipid transport and metabolism ;}	{NA}	{GO:0003824; NA GO:0006508; proteolysis; biological_process GO:0008233; peptidase activity; molecular_function GO:0008152; NA}	{NA}	{NA}	{NA}	{NA}	{NA}	{false}	{NA}	{PF00378:Enoyl-CoA hydratase/isomerase PF01343:Peptidase family S49}
MAR44G.1_GM000254	{Scaffold1:284782:285804:-}	{WP_055672435.1; nitronate monooxygenase family protein [Roseibium alexandrii]}	{Q9I4V0; NADH:quinone reductase }	{smic:SmB9_19560; K23948 E1.6.5.9 NADH:quinone reductase (non-electrogenic) 1.6.5.9 --}	{WP.121047787.1; COG2070 NAD(P)H-dependent flavin oxidoreductase YrpB, nitropropane dioxygenase family R General function prediction only ;}	{NA}	{GO:0055114; oxidation-reduction process; biological_process GO:0018580; nitronate monooxygenase activity; molecular_function GO:0016491; oxidoreductase activity; molecular_function GO:0003824; NA}	{NA}	{NA}	{NA}	{NA}	{NA}	{false}	{NA}	{PF03060:Nitronate monooxygenase PF01070:FMN-dependent dehydrogenase PF00478:IMP dehydrogenase / GMP reductase domain}
MAR44G.1_GM000255	{Scaffold1:286014:287162:+}	{WP_008195790.1; pyridoxal-dependent decarboxylase [Roseibium alexandrii]}	{NA}	{hbc:AEM38_03070; K13745 ddc L-2,4-diaminobutyrate decarboxylase 4.1.1.86 Metabolism; Amino acid metabolism; Glycine, serine and threonine metabolism [PATH:ko00260]}	{WP.054048803.1; COG0076 Glutamate or tyrosine decarboxylase or a related PLP-dependent protein E Amino acid transport and metabolism ;}	{NA}	{GO:0019752; carboxylic acid metabolic process; biological_process GO:0030170; pyridoxal phosphate binding; molecular_function GO:0016831; carboxy-lyase activity; molecular_function}	{NA}	{NA}	{NA}	{NA}	{NA}	{false}	{NA}	{PF00282:Pyridoxal-dependent decarboxylase conserved domain}
MAR44G.1_GM000256	{Scaffold1:287239:289092:-}	{WP_040451342.1; dihydroxy-acid dehydratase [Roseibium alexandrii]}	{P39522; Dihydroxy-acid dehydratase, mitochondrial }	{labr:CHH27_14585; K01687 ilvD dihydroxy-acid dehydratase 4.2.1.9 Metabolism; Amino acid metabolism; Valine, leucine and isoleucine biosynthesis [PATH:ko00290] Metabolism; Metabolism of cofactors and vitamins; Pantothenate and CoA biosynthesis [PATH:ko00770]}	{WP.015494704.1; COG0129 Dihydroxyacid dehydratase/phosphogluconate dehydratase EG Amino acid transport and metabolism ; Carbohydrate transport and metabolism ;}	{NA}	{GO:0008152; NA GO:0003824; NA}	{NA}	{NA}	{NA}	{NA}	{NA}	{false}	{NA}	{PF00920:Dehydratase family}
MAR44G.1_GM000257	{Scaffold1:289408:290061:-}	{WP_055672402.1; fructose-6-phosphate aldolase [Roseibium alexandrii]}	{Q11DE1; Probable transaldolase }	{labp:FJ695_01655; K00616 E2.2.1.2, talA, talB transaldolase 2.2.1.2 Metabolism; Carbohydrate metabolism; Pentose phosphate pathway [PATH:ko00030]}	{WP.077290992.1; COG0176 Transaldolase/fructose-6-phosphate aldolase G Carbohydrate transport and metabolism ;}	{NA}	{GO:0005975; carbohydrate metabolic process; biological_process}	{NA}	{NA}	{NA}	{NA}	{NA}	{false}	{NA}	{PF00923:Transaldolase}
MAR44G.1_GM000258	{Scaffold1:290334:292529:+}	{WP_008193415.1; primosomal protein N' [Roseibium alexandrii]}	{P05445; Primosomal protein N' }	{labp:FJ695_01650; K04066 priA primosomal protein N' (replication factor Y) (superfamily II helicase) 5.6.2.4 Genetic Information Processing; Replication and repair; Homologous recombination [PATH:ko03440]}	{WP.077290991.1; COG1198 Primosomal protein N' (replication factor Y) - superfamily II helicase L Replication, recombination and repair ;}	{NA}	{GO:0016787; hydrolase activity; molecular_function GO:0008270; zinc ion binding; molecular_function GO:0003676; nucleic acid binding; molecular_function GO:0004386; helicase activity; molecular_function GO:0005524; ATP binding; molecular_function GO:0003677; DNA binding; molecular_function GO:0008026; ATP-dependent helicase activity; molecular_function}	{NA}	{NA}	{NA}	{NA}	{NA}	{false}	{NA}	{PF04851:Type III restriction enzyme, res subunit PF05495:CHY zinc finger PF00271:Helicase conserved C-terminal domain PF00270:DEAD/DEAH box helicase}
MAR44G.1_GM000259	{Scaffold1:292616:292975:+}	{WP_055672404.1; DUF1428 domain-containing protein [Roseibium alexandrii]}	{P0AAQ8; Uncharacterized protein YbaA }	{NA}	{WP.043868961.1; COG5507 Uncharacterized conserved protein YbaA, DUF1428 family S Function unknown ;}	{gnl|TC-DB|P0AAQ6; 3.A.5.1.1 Uncharacterized protein ybaA OS=Escherichia coli (strain K12) GN=ybaA PE=4 SV=1}	{NA}	{NA}	{NA}	{NA}	{NA}	{NA}	{false}	{NA}	{NA}
MAR44G.1_GM000260	{Scaffold1:293341:293871:+}	{WP_055672405.1; F0F1 ATP synthase subunit delta [Roseibium alexandrii]}	{Q11DD8; ATP synthase subunit delta }	{labp:FJ695_01645; K02113 ATPF1D, atpH F-type H+-transporting ATPase subunit delta -- Metabolism; Energy metabolism; Oxidative phosphorylation [PATH:ko00190] Metabolism; Energy metabolism; Photosynthesis [PATH:ko00195]}	{WP.022998997.1; COG0712 FoF1-type ATP synthase, delta subunit C Energy production and conversion ;}	{gnl|TC-DB|A1B8N7; 3.A.2.1.7 ATP synthase subunit delta OS=Paracoccus denitrificans (strain Pd 1222) GN=atpH PE=3 SV=2}	{GO:0015986; ATP synthesis coupled proton transport; biological_process GO:0046933; hydrogen ion transporting ATP synthase activity, rotational mechanism; molecular_function}	{NA}	{NA}	{NA}	{NA}	{NA}	{false}	{NA}	{PF00213:ATP synthase delta (OSCP) subunit}
MAR44G.1_GM000261	{Scaffold1:293871:295400:+}	{WP_008191672.1; F0F1 ATP synthase subunit alpha [Roseibium alexandrii]}	{A6WXW9; ATP synthase subunit alpha }	{labp:FJ695_01640; K02111 ATPF1A, atpA F-type H+/Na+-transporting ATPase subunit alpha [EC:7.1.2.2 7.2.2.1] 7.1.2.2,7.2.2.1 Metabolism; Energy metabolism; Oxidative phosphorylation [PATH:ko00190] Metabolism; Energy metabolism; Photosynthesis [PATH:ko00195]}	{WP.022998996.1; COG0056 FoF1-type ATP synthase, alpha subunit C Energy production and conversion ;}	{gnl|TC-DB|A1B8N8; 3.A.2.1.7 ATP synthase subunit alpha OS=Paracoccus denitrificans (strain Pd 1222) GN=atpA PE=3 SV=1}	{GO:0015991; ATP hydrolysis coupled proton transport; biological_process GO:0005524; ATP binding; molecular_function GO:0046034; ATP metabolic process; biological_process GO:0015992; proton transport; biological_process GO:0033178; proton-transporting two-sector ATPase complex, catalytic domain; cellular_component GO:0016820; hydrolase activity, acting on acid anhydrides, catalyzing transmembrane…	{PHI:10773; Q2FWE8 atpA 1280 Staphylococcus aureus prosthetic joint infection Mus musculus (related: house mouse) ATP synthase subunit alpha Gene deletion: full; gene complementation reduced virulence}	{NA}	{NA}	{NA}	{NA}	{false}	{NA}	{PF02874:ATP synthase alpha/beta family, beta-barrel domain PF00006:ATP synthase alpha/beta family, nucleotide-binding domain PF00306:ATP synthase alpha/beta chain, C terminal domain}
MAR44G.1_GM000262	{Scaffold1:295434:296318:+}	{WP_008192076.1; F0F1 ATP synthase subunit gamma [Roseibium alexandrii]}	{Q1MAZ1; ATP synthase gamma chain }	{labp:FJ695_01635; K02115 ATPF1G, atpG F-type H+-transporting ATPase subunit gamma -- Metabolism; Energy metabolism; Oxidative phosphorylation [PATH:ko00190] Metabolism; Energy metabolism; Photosynthesis [PATH:ko00195]}	{WP.077290990.1; COG0224 FoF1-type ATP synthase, gamma subunit C Energy production and conversion ;}	{gnl|TC-DB|A1B8N9; 3.A.2.1.7 ATP synthase gamma chain OS=Paracoccus denitrificans (strain Pd 1222) GN=atpG PE=3 SV=1}	{GO:0045261; proton-transporting ATP synthase complex, catalytic core F(1); cellular_component GO:0046961; proton-transporting ATPase activity, rotational mechanism; molecular_function GO:0015986; ATP synthesis coupled proton transport; biological_process GO:0031411; gas vesicle; cellular_component GO:0031412; gas vesicle organization; biological_process GO:0046933; hydrogen ion transporting ATP …	{NA}	{NA}	{NA}	{NA}	{NA}	{false}	{NA}	{PF06386:Gas vesicle synthesis protein GvpL/GvpF PF00231:ATP synthase}
MAR44G.1_GM000263	{Scaffold1:296344:297768:+}	{WP_055672406.1; F0F1 ATP synthase subunit beta [Roseibium alexandrii]}	{A6UDM1; ATP synthase subunit beta }	{labp:FJ695_01630; K02112 ATPF1B, atpD F-type H+/Na+-transporting ATPase subunit beta [EC:7.1.2.2 7.2.2.1] 7.1.2.2,7.2.2.1 Metabolism; Energy metabolism; Oxidative phosphorylation [PATH:ko00190] Metabolism; Energy metabolism; Photosynthesis [PATH:ko00195]}	{WP.022998994.1; COG0055 FoF1-type ATP synthase, beta subunit C Energy production and conversion ;}	{gnl|TC-DB|A1B8P0; 3.A.2.1.7 ATP synthase subunit beta OS=Paracoccus denitrificans (strain Pd 1222) GN=atpD PE=3 SV=1}	{GO:0046034; ATP metabolic process; biological_process GO:0004143; diacylglycerol kinase activity; molecular_function GO:0015992; proton transport; biological_process GO:0003924; GTPase activity; molecular_function GO:0043531; ADP binding; molecular_function GO:0005525; GTP binding; molecular_function GO:0005524; ATP binding; molecular_function GO:0007205; activation of protein kinase C activity …	{NA}	{NA}	{NA}	{NA}	{NA}	{false}	{NA}	{PF01637:ATPase domain predominantly from Archaea PF00931:NB-ARC domain PF03193:Protein of unknown function, DUF258 PF00781:Diacylglycerol kinase catalytic domain PF00006:ATP synthase alpha/beta family, nucleotide-binding domain PF02874:ATP synthase alpha/beta family, beta-barrel domain}
MAR44G.1_GM000264	{Scaffold1:297872:298279:+}	{WP_040451346.1; F0F1 ATP synthase subunit epsilon [Roseibium alexandrii]}	{Q98EV9; ATP synthase epsilon chain }	{labp:FJ695_01625; K02114 ATPF1E, atpC F-type H+-transporting ATPase subunit epsilon -- Metabolism; Energy metabolism; Oxidative phosphorylation [PATH:ko00190] Metabolism; Energy metabolism; Photosynthesis [PATH:ko00195]}	{WP.022998993.1; COG0355 FoF1-type ATP synthase, epsilon subunit C Energy production and conversion ;}	{NA}	{GO:0015986; ATP synthesis coupled proton transport; biological_process GO:0046961; proton-transporting ATPase activity, rotational mechanism; molecular_function GO:0045261; proton-transporting ATP synthase complex, catalytic core F(1); cellular_component GO:0046933; hydrogen ion transporting ATP synthase activity, rotational mechanism; molecular_function}	{NA}	{NA}	{NA}	{NA}	{NA}	{false}	{NA}	{PF02823:ATP synthase, Delta/Epsilon chain, beta-sandwich domain}
MAR44G.1_GM000265	{Scaffold1:298377:301010:-}	{CTQ71652.1; putative diguanylate cyclase YdaM [Roseibium alexandrii]}	{NA}	{NA}	{WP.077290989.1; COG2203 GAF domain T Signal transduction mechanisms ;}	{NA}	{GO:0005515; protein binding; molecular_function GO:0007165; signal transduction; biological_process GO:0004871; signal transducer activity; molecular_function GO:0006355; regulation of transcription, DNA-dependent; biological_process}	{NA}	{NA}	{NA}	{NA}	{NA}	{false}	{NA}	{PF13185:GAF domain PF13188:PAS domain PF13426:PAS domain PF08447:PAS fold PF00989:PAS fold PF01590:GAF domain}
MAR44G.1_GM000266	{Scaffold1:301326:301532:-}	{WP_008194497.1; hypothetical protein [Roseibium alexandrii]}	{NA}	{NA}	{WP.022998990.1; COG5352 Uncharacterized conserved protein S Function unknown ;}	{NA}	{NA}	{NA}	{NA}	{NA}	{NA}	{NA}	{false}	{NA}	{NA}
MAR44G.1_GM000267	{Scaffold1:301822:303441:-}	{WP_055672408.1; molybdopterin-binding/glycosyltransferase family 2 protein [Roseibium alexandrii]}	{NA}	{labp:FJ695_01610; K07141 mocA molybdenum cofactor cytidylyltransferase 2.7.7.76 Metabolism; Metabolism of cofactors and vitamins; Folate biosynthesis [PATH:ko00790]}	{WP.077290988.1; COG2068 CTP:molybdopterin cytidylyltransferase MocA H Coenzyme transport and metabolism ;}	{NA}	{GO:0016779; nucleotidyltransferase activity; molecular_function GO:0009103; lipopolysaccharide biosynthetic process; biological_process GO:0006777; Mo-molybdopterin cofactor biosynthetic process; biological_process GO:0003824; NA GO:0009058; biosynthetic process; biological_process GO:0008299; isoprenoid biosynthetic process; biological_process}	{NA}	{NA}	{NA}	{NA}	{NA}	{false}	{NA}	{PF02348:Cytidylyltransferase PF01128:2-C-methyl-D-erythritol 4-phosphate cytidylyltransferase PF00483:Nucleotidyl transferase PF00994:Probable molybdopterin binding domain PF01983:Guanylyl transferase CofC like}
MAR44G.1_GM000268	{Scaffold1:303438:304133:-}	{WP_055672409.1; XdhC family protein [Roseibium alexandrii]}	{NA}	{labp:FJ695_01605; K07402 xdhC xanthine dehydrogenase accessory factor -- --}	{WP.077290987.1; COG1975 Molybdoenzyme maturation factor PaoD (Mo cofactor insertion), XdhC/CoxF family O Posttranslational modification, protein turnover, chaperones ;}	{NA}	{NA}	{NA}	{NA}	{NA}	{NA}	{NA}	{false}	{NA}	{NA}
MAR44G.1_GM000269	{Scaffold1:304135:304764:-}	{WP_040451349.1; LysE family translocator [Roseibium alexandrii]}	{NA}	{NA}	{WP.062490784.1; COG1280 Threonine/homoserine/homoserine lactone efflux protein E Amino acid transport and metabolism ;}	{NA}	{GO:0006865; amino acid transport; biological_process GO:0016020; membrane; cellular_component GO:0016021; integral to membrane; cellular_component}	{NA}	{NA}	{NA}	{NA}	{NA}	{false}	{NA}	{PF01810:LysE type translocator PF03741:Integral membrane protein TerC family}
MAR44G.1_GM000270	{Scaffold1:304778:305119:-}	{CTQ71666.1; putative xanthine dehydrogenase subunit A [Roseibium alexandrii]}	{NA}	{NA}	{WP.022998985.1; COG1975 Molybdoenzyme maturation factor PaoD (Mo cofactor insertion), XdhC/CoxF family O Posttranslational modification, protein turnover, chaperones ;}	{NA}	{NA}	{NA}	{NA}	{NA}	{NA}	{NA}	{false}	{NA}	{NA}
MAR44G.1_GM000271	{Scaffold1:305282:305500:+}	{WP_040451351.1; hypothetical protein [Roseibium alexandrii]}	{NA}	{NA}	{NA}	{NA}	{NA}	{NA}	{NA}	{NA}	{NA}	{NA}	{false}	{NA}	{NA}
MAR44G.1_GM000272	{Scaffold1:305680:307098:+}	{WP_144432159.1; radical SAM protein [Roseibium alexandrii]}	{NA}	{NA}	{NA}	{NA}	{GO:0003824; NA GO:0051536; iron-sulfur cluster binding; molecular_function}	{NA}	{NA}	{NA}	{NA}	{NA}	{false}	{NA}	{PF04055:Radical SAM superfamily}
MAR44G.1_GM000273	{Scaffold1:307064:308008:+}	{WP_040451354.1; hypothetical protein [Roseibium alexandrii]}	{NA}	{NA}	{NA}	{NA}	{GO:0016021; integral to membrane; cellular_component GO:0016746; transferase activity, transferring acyl groups; molecular_function GO:0009244; lipopolysaccharide core region biosynthetic process; biological_process}	{NA}	{NA}	{NA}	{NA}	{NA}	{false}	{NA}	{PF03279:Bacterial lipid A biosynthesis acyltransferase}
MAR44G.1_GM000274	{Scaffold1:308522:310132:-}	{WP_008190696.1; phosphoenolpyruvate carboxykinase [Roseibium alexandrii]}	{A6WX47; Phosphoenolpyruvate carboxykinase (ATP) }	{labp:FJ695_01590; K01610 E4.1.1.49, pckA phosphoenolpyruvate carboxykinase (ATP) 4.1.1.49 Metabolism; Carbohydrate metabolism; Glycolysis / Gluconeogenesis [PATH:ko00010] Metabolism; Carbohydrate metabolism; Citrate cycle (TCA cycle) [PATH:ko00020] Metabolism; Carbohydrate metabolism; Pyruvate metabolism [PATH:ko00620] Metabolism; Energy metabolism; Carbon fixation in photosynthetic organisms [P…	{WP.077290986.1; COG1866 Phosphoenolpyruvate carboxykinase, ATP-dependent C Energy production and conversion ;}	{NA}	{GO:0005524; ATP binding; molecular_function GO:0006094; gluconeogenesis; biological_process GO:0004612; phosphoenolpyruvate carboxykinase (ATP) activity; molecular_function}	{PHI:424; F5HAA8 PCK1 5207 Cryptococcus neoformans cryptococcosis Mus musculus (related: house mouse) Phosphoenolpyruvate carboxykinase Gene deletion; gene complementation reduced virulence}	{NA}	{NA}	{NA}	{NA}	{false}	{NA}	{PF01293:Phosphoenolpyruvate carboxykinase}
MAR44G.1_GM000275	{Scaffold1:310131:310496:+}	{WP_248155278.1; hypothetical protein [Roseibium sp. CAU 1639]}	{NA}	{NA}	{NA}	{NA}	{NA}	{NA}	{NA}	{NA}	{NA}	{NA}	{false}	{NA}	{NA}
MAR44G.1_GM000276	{Scaffold1:310872:311570:+}	{EEE45885.2; Response regulator [Roseibium alexandrii DFL-11]}	{P50350; Transcriptional regulatory protein ChvI }	{labp:FJ695_01585; K14981 chvI two-component system, OmpR family, response regulator ChvI -- Environmental Information Processing; Signal transduction; Two-component system [PATH:ko02020]}	{WP.031268674.1; COG0745 DNA-binding response regulator, OmpR family, contains REC and winged-helix (wHTH) domain TK Signal transduction mechanisms ; Transcription ;}	{NA}	{GO:0006355; regulation of transcription, DNA-dependent; biological_process GO:0000160; two-component signal transduction system (phosphorelay); biological_process GO:0003677; DNA binding; molecular_function GO:0000156; two-component response regulator activity; molecular_function}	{NA}	{VFG011626; VF0368 BvrR-BvrS bvrR response regulator transcription factor Homologous to the ChvI/ExoS and ChvI/ChvG two-component regulatory systems of Sinorhizobium meliloti and Agrobacterium tumefaciens respectively. Like their Brucella counterpart, the S. meliloti ChvI/ExoS and A. tumefaciens ChvI/ChvG two component regulatory systems also regulate genes involved in modulating cell envelope pr…	{NA}	{ARO:3000553, ARO:3002929, ARO:3003066, ARO:3004054, ARO:3002922, ARO:3000828, ARO:3000816, ARO:3002924, ARO:3002925, ARO:3002926, ARO:3002928, ARO:3002927, ARO:3003728, ARO:3002919, ARO:3004055, ARO:3002923, ARO:3000838; adeR, vanRN, smeR, Pseudomonas aeruginosa CpxR, vanRC, baeR, mtrA, vanRE, vanRF, vanRG, vanRM, vanRL, vanRI, vanRA, Escherichia coli CpxR, vanRD, arlR 135.191, 146.362, 149.828,…	{NA}	{false}	{NA}	{PF00486:Transcriptional regulatory protein, C terminal PF00072:Response regulator receiver domain}
MAR44G.1_GM000277	{Scaffold1:311603:313426:+}	{WP_008194196.1; sensor histidine kinase [Roseibium alexandrii]}	{P72292; Sensor protein ChvG }	{labp:FJ695_01580; K14980 chvG two-component system, OmpR family, sensor histidine kinase ChvG 2.7.13.3 Environmental Information Processing; Signal transduction; Two-component system [PATH:ko02020]}	{WP.022998982.1; COG5002 Sensor histidine kinase WalK T Signal transduction mechanisms ;}	{NA}	{GO:0016021; integral to membrane; cellular_component GO:0000155; two-component sensor activity; molecular_function GO:0016020; membrane; cellular_component GO:0007165; signal transduction; biological_process GO:0005524; ATP binding; molecular_function GO:0004871; signal transducer activity; molecular_function}	{NA}	{VFG011631; VF0368 BvrR-BvrS bvrS stimulus-sensing domain-containing protein Homologous to the ChvI/ExoS and ChvI/ChvG two-component regulatory systems of Sinorhizobium meliloti and Agrobacterium tumefaciens respectively. Like their Brucella counterpart, the S. meliloti ChvI/ExoS and A. tumefaciens ChvI/ChvG two component regulatory systems also regulate genes involved in modulating cell envelope…	{NA}	{NA}	{NA}	{false}	{NA}	{PF00512:His Kinase A (phospho-acceptor) domain PF00672:HAMP domain PF02518:Histidine kinase-, DNA gyrase B-, and HSP90-like ATPase}
MAR44G.1_GM000278	{Scaffold1:313423:313890:+}	{WP_008190610.1; aldolase [Roseibium alexandrii]}	{NA}	{labp:FJ695_01575; K06023 hprK, ptsK HPr kinase/phosphorylase [EC:2.7.11.- 2.7.4.-] 2.7.11.-,2.7.4.- --}	{WP.077290985.1; COG1493 Serine kinase of the HPr protein, regulates carbohydrate metabolism T Signal transduction mechanisms ;}	{NA}	{GO:0006355; regulation of transcription, DNA-dependent; biological_process GO:0004672; protein kinase activity; molecular_function GO:0006109; regulation of carbohydrate metabolic process; biological_process GO:0005524; ATP binding; molecular_function GO:0000160; two-component signal transduction system (phosphorelay); biological_process GO:0000155; two-component sensor activity; molecular_funct…	{NA}	{NA}	{NA}	{NA}	{NA}	{false}	{NA}	{PF00158:Sigma-54 interaction domain PF07475:HPr Serine kinase C-terminal domain PF00005:ABC transporter}
MAR44G.1_GM000279	{Scaffold1:314011:314415:+}	{WP_008193884.1; PTS sugar transporter subunit IIA [Roseibium alexandrii]}	{NA}	{labp:FJ695_01570; K02793 manXa mannose PTS system EIIA component 2.7.1.191 Metabolism; Carbohydrate metabolism; Fructose and mannose metabolism [PATH:ko00051] Metabolism; Carbohydrate metabolism; Amino sugar and nucleotide sugar metabolism [PATH:ko00520] Environmental Information Processing; Membrane transport; Phosphotransferase system (PTS) [PATH:ko02060]}	{WP.022998980.1; COG2893 Phosphotransferase system, mannose/fructose-specific component IIA G Carbohydrate transport and metabolism ;}	{gnl|TC-DB|C8X384; 4.A.6.2.2 PTS system fructose subfamily IIA component OS=Desulfohalobium retbaense (strain ATCC 49708 / DSM 5692 / JCM 16813 / HR100) GN=Dret_1597 PE=4 SV=1}	{GO:0009401; phosphoenolpyruvate-dependent sugar phosphotransferase system; biological_process GO:0016021; integral to membrane; cellular_component}	{NA}	{NA}	{NA}	{NA}	{NA}	{false}	{NA}	{PF03610:PTS system fructose IIA component}
MAR44G.1_GM000280	{Scaffold1:314437:314706:+}	{WP_008193177.1; HPr family phosphocarrier protein [Roseibium alexandrii]}	{P23537; Phosphocarrier protein HPr }	{labp:FJ695_01565; K02784 ptsH phosphocarrier protein HPr -- Environmental Information Processing; Membrane transport; Phosphotransferase system (PTS) [PATH:ko02060]}	{WP.022998979.1; COG1925 HPr or related phosphotransfer protein TG Signal transduction mechanisms ; Carbohydrate transport and metabolism ;}	{gnl|TC-DB|H1XXZ0; 8.A.8.1.5 Phosphotransferase system, phosphocarrier protein HPr OS=Caldithrix abyssi DSM 13497 GN=Calab_1239 PE=4 SV=1}	{GO:0009401; phosphoenolpyruvate-dependent sugar phosphotransferase system; biological_process GO:0005351; sugar:hydrogen symporter activity; molecular_function}	{NA}	{NA}	{NA}	{NA}	{NA}	{false}	{NA}	{PF00381:PTS HPr component phosphorylation site}
MAR44G.1_GM000281	{Scaffold1:314729:316051:+}	{CTQ71702.1; Cyclopropane mycolic acid synthase 1 [Roseibium alexandrii]}	{NA}	{labp:FJ695_01560; K00574 cfa cyclopropane-fatty-acyl-phospholipid synthase 2.1.1.79 --}	{WP.077290984.1; COG2230 Cyclopropane fatty-acyl-phospholipid synthase and related methyltransferases I Lipid transport and metabolism ;}	{NA}	{GO:0008152; NA GO:0016429; tRNA (adenine-N1-)-methyltransferase activity; molecular_function GO:0031515; tRNA (m1A) methyltransferase complex; cellular_component GO:0004719; protein-L-isoaspartate (D-aspartate) O-methyltransferase activity; molecular_function GO:0008610; lipid biosynthetic process; biological_process GO:0006464; protein modification process; biological_process GO:0008168; methyl…	{NA}	{NA}	{NA}	{NA}	{NA}	{false}	{NA}	{PF02353:Mycolic acid cyclopropane synthetase PF08704:tRNA methyltransferase complex GCD14 subunit PF08241:Methyltransferase domain PF05175:Methyltransferase small domain PF08123:Histone methylation protein DOT1 PF01135:Protein-L-isoaspartate(D-aspartate) O-methyltransferase (PCMT)}
MAR44G.1_GM000282	{Scaffold1:316189:317706:+}	{OJJ12764.1; adenosylhomocysteinase [Alphaproteobacteria bacterium AO1-B]}	{Q92TC1; Adenosylhomocysteinase }	{labp:FJ695_01555; K01251 AHCY, ahcY adenosylhomocysteinase 3.13.2.1 Metabolism; Amino acid metabolism; Cysteine and methionine metabolism [PATH:ko00270]}	{WP.022998977.1; COG0499 S-adenosylhomocysteine hydrolase H Coenzyme transport and metabolism ;}	{gnl|TC-DB|O43865; 8.A.151.1.1 S-adenosylhomocysteine hydrolase-like protein 1 OS=Homo sapiens OX=9606 GN=AHCYL1 PE=1 SV=2}	{GO:0055114; oxidation-reduction process; biological_process GO:0003857; 3-hydroxyacyl-CoA dehydrogenase activity; molecular_function GO:0006631; fatty acid metabolic process; biological_process GO:0048037; cofactor binding; molecular_function GO:0003824; NA GO:0004013; adenosylhomocysteinase activity; molecular_function GO:0006730; one-carbon metabolic process; biological_process GO:0006779; por…	{PHI:11601; A0A0E0SID1 sah1 (FGSG_05615) 5518 Fusarium graminearum fusarium head blight Triticum aestivum (related: bread wheat) S-adenosyl-L-homocysteine hydrolase Gene deletion: full; gene complementation reduced virulence}	{NA}	{NA}	{NA}	{NA}	{false}	{NA}	{PF13241:Putative NAD(P)-binding PF02882:Tetrahydrofolate dehydrogenase/cyclohydrolase, NAD(P)-binding domain PF02737:3-hydroxyacyl-CoA dehydrogenase, NAD binding domain PF07991:Acetohydroxy acid isomeroreductase, NADPH-binding domain PF02826:D-isomer specific 2-hydroxyacid dehydrogenase, NAD binding domain PF05221:S-adenosyl-L-homocysteine hydrolase PF02254:TrkA-N domain}
MAR44G.1_GM000283	{Scaffold1:317957:320470:+}	{WP_144432160.1; PAS domain-containing sensor histidine kinase [Roseibium alexandrii]}	{NA}	{NA}	{WP.077290983.1; COG2202 PAS domain T Signal transduction mechanisms ;}	{NA}	{GO:0007165; signal transduction; biological_process GO:0006355; regulation of transcription, DNA-dependent; biological_process GO:0004871; signal transducer activity; molecular_function GO:0005524; ATP binding; molecular_function GO:0000155; two-component sensor activity; molecular_function GO:0016020; membrane; cellular_component}	{NA}	{NA}	{NA}	{NA}	{NA}	{false}	{NA}	{PF02518:Histidine kinase-, DNA gyrase B-, and HSP90-like ATPase PF13188:PAS domain PF00989:PAS fold PF00512:His Kinase A (phospho-acceptor) domain}
MAR44G.1_GM000284	{Scaffold1:320484:322016:+}	{WP_055672416.1; tRNA (adenosine(37)-N6)-threonylcarbamoyltransferase complex ATPase subunit type 1 TsaE [Roseibium alexandrii]}	{NA}	{labp:FJ695_01545; K07102 amgK N-acetylmuramate 1-kinase 2.7.1.221 Metabolism; Carbohydrate metabolism; Amino sugar and nucleotide sugar metabolism [PATH:ko00520]}	{WP.077290982.1; COG3178 Predicted phosphotransferase, aminoglycoside/choline kinase (APH/ChoK) family R General function prediction only ;}	{NA}	{GO:0070526; threonylcarbamoyladenosine biosynthetic process; biological_process GO:0003924; GTPase activity; molecular_function GO:0016887; ATPase activity; molecular_function GO:0005524; ATP binding; molecular_function GO:0005525; GTP binding; molecular_function}	{NA}	{NA}	{NA}	{NA}	{NA}	{false}	{NA}	{PF00005:ABC transporter PF02367:Threonylcarbamoyl adenosine biosynthesis protein TsaE PF03193:Protein of unknown function, DUF258}
MAR44G.1_GM000285	{Scaffold1:322050:322790:+}	{WP_082429086.1; nucleotidyltransferase family protein [Roseibium alexandrii]}	{Q9A2M1; N-acetylmuramate alpha-1-phosphate uridylyltransferase }	{labp:FJ695_01540; K00992 murU N-acetyl-alpha-D-muramate 1-phosphate uridylyltransferase 2.7.7.99 Metabolism; Carbohydrate metabolism; Amino sugar and nucleotide sugar metabolism [PATH:ko00520]}	{WP.031268670.1; COG1208 NDP-sugar pyrophosphorylase, includes eIF-2Bgamma, eIF-2Bepsilon, and LPS biosynthesis protein s JM Translation, ribosomal structure and biogenesis ; Cell wall/membrane/envelope biogenesis ;}	{NA}	{GO:0008299; isoprenoid biosynthetic process; biological_process GO:0009058; biosynthetic process; biological_process GO:0003824; NA GO:0016779; nucleotidyltransferase activity; molecular_function}	{NA}	{NA}	{NA}	{NA}	{NA}	{false}	{NA}	{PF01128:2-C-methyl-D-erythritol 4-phosphate cytidylyltransferase PF00483:Nucleotidyl transferase}
MAR44G.1_GM000286	{Scaffold1:322794:325934:+}	{WP_008189525.1; double-strand break repair protein AddB [Roseibium alexandrii]}	{NA}	{labp:FJ695_01535; K16899 addB ATP-dependent helicase/nuclease subunit B [EC:5.6.2.4 3.1.-.-] 5.6.2.4,3.1.-.- --}	{WP.077290981.1; COG3893 Inactivated superfamily I helicase L Replication, recombination and repair ;}	{NA}	{NA}	{NA}	{NA}	{NA}	{NA}	{NA}	{false}	{NA}	{NA}
MAR44G.1_GM000287	{Scaffold1:325931:329446:+}	{WP_055672926.1; double-strand break repair helicase AddA [Roseibium alexandrii]}	{NA}	{labp:FJ695_01530; K16898 addA ATP-dependent helicase/nuclease subunit A [EC:5.6.2.4 3.1.-.-] 5.6.2.4,3.1.-.- --}	{WP.077290980.1; COG1074 3?ã-5?ã helicase subunit RecB of the DNA repair enzyme RecBCD (exonuclease V) L Replication, recombination and repair ;}	{NA}	{GO:0008026; ATP-dependent helicase activity; molecular_function GO:0005524; ATP binding; molecular_function GO:0003676; nucleic acid binding; molecular_function GO:0016787; hydrolase activity; molecular_function}	{NA}	{NA}	{NA}	{NA}	{NA}	{false}	{NA}	{PF01443:Viral (Superfamily 1) RNA helicase PF00580:UvrD/REP helicase N-terminal domain PF13361:UvrD-like helicase C-terminal domain PF00270:DEAD/DEAH box helicase}
MAR44G.1_GM000288	{Scaffold1:329532:329852:+}	{WP_055672927.1; thioredoxin [Roseibium alexandrii]}	{P00275; Thioredoxin C-1 }	{labp:FJ695_01525; K03671 trxA thioredoxin 1 -- Organismal Systems; Immune system; NOD-like receptor signaling pathway [PATH:ko04621] Human Diseases; Infectious disease: bacterial; Salmonella infection [PATH:ko05132] Human Diseases; Neurodegenerative disease; Parkinson disease [PATH:ko05012] Human Diseases; Cardiovascular disease; Fluid shear stress and atherosclerosis [PATH:ko05418]}	{WP.022998971.1; COG3118 Chaperedoxin CnoX, contains thioredoxin-like and TPR-like domains, YbbN/TrxSC family O Posttranslational modification, protein turnover, chaperones ;}	{NA}	{GO:0016491; oxidoreductase activity; molecular_function GO:0045454; cell redox homeostasis; biological_process GO:0007067; mitosis; biological_process GO:0009055; NA GO:0055114; oxidation-reduction process; biological_process GO:0015035; protein disulfide oxidoreductase activity; molecular_function GO:0005681; spliceosomal complex; cellular_component GO:0016209; NA}	{PHI:2644; P0AA28 thioredoxin 1 28901 Salmonella enterica food poisoning Caenorhabditis elegans (related: roundworm) Redox activity Chemical complementation reduced virulence}	{NA}	{NA}	{NA}	{NA}	{false}	{NA}	{PF00462:Glutaredoxin PF00578:AhpC/TSA family PF02966:Mitosis protein DIM1 PF08534:Redoxin PF00085:Thioredoxin}
MAR44G.1_GM000289	{Scaffold1:330005:330640:+}	{WP_008194207.1; nucleotide exchange factor GrpE [Roseibium alexandrii]}	{P63187; Protein GrpE }	{labp:FJ695_01520; K03687 GRPE molecular chaperone GrpE -- --}	{WP.022998970.1; COG0576 Molecular chaperone GrpE (heat shock protein HSP-70) O Posttranslational modification, protein turnover, chaperones ;}	{gnl|TC-DB|P38523; 3.A.8.1.1 GrpE protein homolog, mitochondrial precursor - Saccharomyces cerevisiae (Baker's yeast).}	{GO:0000774; adenyl-nucleotide exchange factor activity; molecular_function GO:0003729; mRNA binding; molecular_function GO:0006457; protein folding; biological_process GO:0051087; chaperone binding; molecular_function GO:0042803; protein homodimerization activity; molecular_function GO:0005685; U1 snRNP; cellular_component GO:0006376; mRNA splice site selection; biological_process}	{NA}	{NA}	{NA}	{NA}	{NA}	{false}	{NA}	{PF03194:LUC7 N_terminus PF01025:GrpE}
MAR44G.1_GM000290	{Scaffold1:330716:331327:+}	{WP_055672929.1; trimeric intracellular cation channel family protein [Roseibium alexandrii]}	{NA}	{NA}	{WP.077293202.1; COG2860 Uncharacterized membrane protein YeiH S Function unknown ;}	{gnl|TC-DB|A4WTL9; 1.A.62.2.4 Uncharacterized protein OS=Rhodobacter sphaeroides (strain ATCC 17025 / ATH 2.4.3) GN=Rsph17025_1842 PE=4 SV=1}	{NA}	{NA}	{NA}	{NA}	{NA}	{NA}	{false}	{NA}	{NA}
MAR44G.1_GM000291	{Scaffold1:331416:331790:+}	{CTQ73514.1; 27 kDa antigen Cfp30B [Roseibium alexandrii]}	{NA}	{labp:FJ695_01500; K06996 K06996 uncharacterized protein -- --}	{WP.055038920.1; COG3324 Lactoylglutathione lyase-related enzyme, vicinal oxygen chelate (VOC) family R General function prediction only ;}	{NA}	{NA}	{NA}	{NA}	{NA}	{NA}	{NA}	{false}	{NA}	{NA}
MAR44G.1_GM000292	{Scaffold1:331849:331986:-}	{NA}	{NA}	{NA}	{NA}	{NA}	{NA}	{NA}	{NA}	{NA}	{NA}	{NA}	{false}	{NA}	{NA}
MAR44G.1_GM000293	{Scaffold1:332082:332990:-}	{WP_008194521.1; ornithine cyclodeaminase [Roseibium alexandrii]}	{NA}	{labp:FJ695_01495; K19742 lhpI 1-pyrroline-2-carboxylate reductase [NAD(P)H] 1.5.1.49 Metabolism; Amino acid metabolism; Arginine and proline metabolism [PATH:ko00330]}	{WP.077290979.1; COG2423 Ornithine cyclodeaminase/archaeal alanine dehydrogenase, mu-crystallin family E Amino acid transport and metabolism ;}	{NA}	{NA}	{NA}	{NA}	{NA}	{NA}	{NA}	{false}	{NA}	{NA}
MAR44G.1_GM000294	{Scaffold1:333001:333366:-}	{WP_040451357.1; lipopolysaccharide assembly protein LapA domain-containing protein [Roseibium alexandrii]}	{NA}	{NA}	{NA}	{NA}	{GO:0016020; membrane; cellular_component GO:0009306; protein secretion; biological_process}	{NA}	{NA}	{NA}	{NA}	{NA}	{false}	{NA}	{PF01312:FlhB HrpN YscU SpaS Family}
MAR44G.1_GM000295	{Scaffold1:333429:333728:-}	{WP_008191762.1; MULTISPECIES: integration host factor subunit beta [Stappiaceae]}	{Q6NDN9; Integration host factor subunit beta }	{labp:FJ695_01485; K05788 ihfB, himD integration host factor subunit beta -- --}	{WP.006940254.1; COG0776 Bacterial nucleoid DNA-binding protein IHF-alpha L Replication, recombination and repair ;}	{NA}	{GO:0003677; DNA binding; molecular_function GO:0043161; proteasomal ubiquitin-dependent protein catabolic process; biological_process GO:0006289; nucleotide-excision repair; biological_process GO:0003684; damaged DNA binding; molecular_function}	{PHI:2673; P64394 himD 28901 Salmonella enterica food poisoning Mus musculus (related: house mouse) Regulators of systemic infection Gene deletion: full; gene complementation reduced virulence}	{NA}	{NA}	{NA}	{NA}	{false}	{NA}	{PF00216:Bacterial DNA-binding protein PF09280:XPC-binding domain}
MAR44G.1_GM000296	{Scaffold1:333744:334730:-}	{WP_008191492.1; signal peptide peptidase SppA [Roseibium alexandrii]}	{Q55682; Putative protease slr0021 }	{labp:FJ695_01480; K04773 sppA protease IV 3.4.21.- --}	{WP.062490767.1; COG0616 Periplasmic serine protease, ClpP class O Posttranslational modification, protein turnover, chaperones ;}	{NA}	{GO:0008233; peptidase activity; molecular_function GO:0006508; proteolysis; biological_process GO:0016021; integral to membrane; cellular_component}	{NA}	{NA}	{NA}	{NA}	{NA}	{false}	{NA}	{PF01972:Serine dehydrogenase proteinase PF01343:Peptidase family S49}
MAR44G.1_GM000297	{Scaffold1:334855:335283:-}	{WP_008193857.1; peptidylprolyl isomerase [Roseibium alexandrii]}	{Q9KNX6; FKBP-type peptidyl-prolyl cis-trans isomerase SlyD }	{NA}	{WP.022998960.1; COG1047 Peptidyl-prolyl cis-trans isomerase, FKBP type O Posttranslational modification, protein turnover, chaperones ;}	{gnl|TC-DB|P62942; 8.A.11.1.2 Peptidyl-prolyl cis-trans isomerase FKBP1A OS=Homo sapiens GN=FKBP1A PE=1 SV=2}	{GO:0006457; protein folding; biological_process}	{PHI:11080; O25748 slyD 210 Helicobacter pylori gastric infection Mus musculus (related: house mouse) Peptidyl-prolyl cis-trans isomerase Gene deletion: full; gene complementation reduced virulence}	{NA}	{NA}	{NA}	{NA}	{false}	{NA}	{PF00254:FKBP-type peptidyl-prolyl cis-trans isomerase}
MAR44G.1_GM000298	{Scaffold1:335529:337544:+}	{WP_050776180.1; bifunctional UDP-sugar hydrolase/5'-nucleotidase [Roseibium alexandrii]}	{NA}	{NA}	{WP.013652540.1; COG0737 2',3'-cyclic-nucleotide 2'-phosphodiesterase/5'- or 3'-nucleotidase, 5'-nucleotidase family FV Nucleotide transport and metabolism ; Defense mechanisms ;}	{NA}	{GO:0016787; hydrolase activity; molecular_function GO:0009166; nucleotide catabolic process; biological_process}	{NA}	{NA}	{NA}	{NA}	{NA}	{false}	{NA}	{PF00149:Calcineurin-like phosphoesterase PF02872:5'-nucleotidase, C-terminal domain}
MAR44G.1_GM000299	{Scaffold1:337653:339329:-}	{CTQ73533.1; hypothetical protein LAX5112_03567 [Roseibium alexandrii]}	{P14129; 30S ribosomal protein S1 }	{labp:FJ695_01465; K02945 RP-S1, rpsA small subunit ribosomal protein S1 -- Genetic Information Processing; Translation; Ribosome [PATH:ko03010]}	{WP.031268654.1; COG0539 Ribosomal protein S1 J Translation, ribosomal structure and biogenesis ;}	{NA}	{GO:0006281; DNA repair; biological_process GO:0005524; ATP binding; molecular_function GO:0006310; DNA recombination; biological_process GO:0009378; four-way junction helicase activity; molecular_function GO:0003723; RNA binding; molecular_function}	{PHI:11468; A0A0H2ZPW2 SPD_1366 (CvfD) 1313 Streptococcus pneumoniae pneumococcal meningitis Mus musculus (related: house mouse) Conserved virulence factor D Gene deletion: full; gene complementation reduced virulence}	{NA}	{NA}	{NA}	{NA}	{false}	{NA}	{PF00575:S1 RNA binding domain PF01330:RuvA N terminal domain}
MAR44G.1_GM000300	{Scaffold1:339622:340242:-}	{WP_055672934.1; (d)CMP kinase [Roseibium alexandrii]}	{C0RG91; Cytidylate kinase }	{labp:FJ695_01460; K00945 cmk CMP/dCMP kinase 2.7.4.25 Metabolism; Nucleotide metabolism; Pyrimidine metabolism [PATH:ko00240]}	{WP.022998949.1; COG0283 Cytidylate kinase F Nucleotide transport and metabolism ;}	{NA}	{GO:0016773; phosphotransferase activity, alcohol group as acceptor; molecular_function GO:0004127; cytidylate kinase activity; molecular_function GO:0006139; nucleobase, nucleoside, nucleotide and nucleic acid metabolic process; biological_process GO:0005524; ATP binding; molecular_function}	{NA}	{NA}	{NA}	{NA}	{NA}	{false}	{NA}	{PF02224:Cytidylate kinase PF01712:Deoxynucleoside kinase}
MAR44G.1_GM000301	{Scaffold1:340239:341594:-}	{WP_055672935.1; 3-phosphoshikimate 1-carboxyvinyltransferase [Roseibium alexandrii]}	{A6WUV8; 3-phosphoshikimate 1-carboxyvinyltransferase }	{labp:FJ695_01455; K00800 aroA 3-phosphoshikimate 1-carboxyvinyltransferase 2.5.1.19 Metabolism; Amino acid metabolism; Phenylalanine, tyrosine and tryptophan biosynthesis [PATH:ko00400]}	{WP.077293198.1; COG0128 5-enolpyruvylshikimate-3-phosphate synthase E Amino acid transport and metabolism ;}	{NA}	{GO:0016765; transferase activity, transferring alkyl or aryl (other than methyl) groups; molecular_function}	{NA}	{NA}	{NA}	{NA}	{NA}	{false}	{NA}	{PF00275:EPSP synthase (3-phosphoshikimate 1-carboxyvinyltransferase)}
MAR44G.1_GM000302	{Scaffold1:341861:342253:+}	{WP_040452763.1; TIGR02300 family protein [Roseibium alexandrii]}	{NA}	{NA}	{WP.062490752.1; COG4530 Uncharacterized conserved protein S Function unknown ;}	{NA}	{GO:0006464; protein modification process; biological_process GO:0005681; spliceosomal complex; cellular_component GO:0003677; DNA binding; molecular_function GO:0016151; nickel ion binding; molecular_function GO:0005634; nucleus; cellular_component GO:0046872; metal ion binding; molecular_function GO:0003899; DNA-directed RNA polymerase activity; molecular_function GO:0016787; hydrolase activity…	{NA}	{NA}	{NA}	{NA}	{NA}	{false}	{NA}	{PF03604:DNA directed RNA polymerase, 7 kDa subunit PF06524:NOA36 protein PF05191:Adenylate kinase, active site lid PF09297:NADH pyrophosphatase zinc ribbon domain PF01155:Hydrogenase/urease nickel incorporation, metallochaperone, hypA PF04889:Cwf15/Cwc15 cell cycle control protein}
MAR44G.1_GM000303	{Scaffold1:342557:342979:+}	{WP_008195248.1; YqaA family protein [Roseibium alexandrii]}	{NA}	{NA}	{WP.013652196.1; COG1238 Uncharacterized membrane protein YqaA, VTT domain S Function unknown ;}	{gnl|TC-DB|B1J6T5; 9.B.27.3.3 Putative uncharacterized protein OS=Pseudomonas putida (strain W619) GN=PputW619_1852 PE=4 SV=1}	{NA}	{NA}	{NA}	{NA}	{NA}	{NA}	{false}	{NA}	{NA}
MAR44G.1_GM000304	{Scaffold1:343464:344789:+}	{WP_055673013.1; extracellular solute-binding protein [Roseibium alexandrii]}	{Q8UB32; sn-glycerol-3-phosphate-binding periplasmic protein UgpB }	{labp:FJ695_01430; K05813 ugpB sn-glycerol 3-phosphate transport system substrate-binding protein -- Environmental Information Processing; Membrane transport; ABC transporters [PATH:ko02010]}	{WP.031268865.1; COG1653 ABC-type glycerol-3-phosphate transport system, periplasmic component G Carbohydrate transport and metabolism ;}	{NA}	{GO:0006810; transport; biological_process GO:0005215; NA}	{NA}	{NA}	{NA}	{NA}	{NA}	{false}	{NA}	{PF01547:Bacterial extracellular solute-binding protein}
MAR44G.1_GM000305	{Scaffold1:344895:345776:+}	{WP_008196833.1; ABC transporter permease subunit [Roseibium alexandrii]}	{Q2YKR6; sn-glycerol-3-phosphate transport system permease protein UgpA }	{labp:FJ695_01425; K05814 ugpA sn-glycerol 3-phosphate transport system permease protein -- Environmental Information Processing; Membrane transport; ABC transporters [PATH:ko02010]}	{WP.055657334.1; COG1175 ABC-type sugar transport system, permease component G Carbohydrate transport and metabolism ;}	{gnl|TC-DB|P10905; 3.A.1.1.3 SN-glycerol-3-phosphate transport system permease protein ugpA - Escherichia coli.}	{GO:0006810; transport; biological_process GO:0005215; NA GO:0016020; membrane; cellular_component}	{NA}	{NA}	{NA}	{NA}	{NA}	{false}	{NA}	{PF00528:Binding-protein-dependent transport system inner membrane component}
MAR44G.1_GM000306	{Scaffold1:345787:346629:+}	{WP_008188752.1; sn-glycerol-3-phosphate ABC transporter permease UgpE [Roseibium alexandrii]}	{Q8YCB0; sn-glycerol-3-phosphate transport system permease protein UgpE }	{labp:FJ695_01420; K05815 ugpE sn-glycerol 3-phosphate transport system permease protein -- Environmental Information Processing; Membrane transport; ABC transporters [PATH:ko02010]}	{WP.022999630.1; COG0395 ABC-type glycerol-3-phosphate transport system, permease component G Carbohydrate transport and metabolism ;}	{gnl|TC-DB|P10906; 3.A.1.1.3 SN-glycerol-3-phosphate transport system permease protein ugpE - Escherichia coli.}	{GO:0016020; membrane; cellular_component GO:0005215; NA GO:0006810; transport; biological_process}	{NA}	{NA}	{NA}	{NA}	{NA}	{false}	{NA}	{PF00528:Binding-protein-dependent transport system inner membrane component}
MAR44G.1_GM000307	{Scaffold1:346638:347714:+}	{WP_008190058.1; sn-glycerol-3-phosphate import ATP-binding protein UgpC [Roseibium alexandrii]}	{Q578E9; sn-glycerol-3-phosphate import ATP-binding protein UgpC }	{labp:FJ695_01415; K05816 ugpC sn-glycerol 3-phosphate transport system ATP-binding protein 7.6.2.10 Environmental Information Processing; Membrane transport; ABC transporters [PATH:ko02010]}	{WP.022999631.1; COG3839 ABC-type sugar transport system, ATPase component MalK G Carbohydrate transport and metabolism ;}	{gnl|TC-DB|Q9L0Q1; 3.A.1.1.36 ABC transporter ATP-binding protein OS=Streptomyces coelicolor GN=SCO4240 PE=3 SV=1}	{GO:0043531; ADP binding; molecular_function GO:0003924; GTPase activity; molecular_function GO:0016851; magnesium chelatase activity; molecular_function GO:0003723; RNA binding; molecular_function GO:0003724; RNA helicase activity; molecular_function GO:0004127; cytidylate kinase activity; molecular_function GO:0006810; transport; biological_process GO:0006139; nucleobase, nucleoside, nucleotide…	{NA}	{VFG030680; VF0842 Trehalose-recycling ABC transporter (VF0842) - Nutritional/Metabolic factor sugC sn-glycerol-3-phosphate ABC transporter ATP-binding protein UgpC - - - -}	{NA}	{NA}	{NA}	{false}	{NA}	{PF03193:Protein of unknown function, DUF258 PF01637:ATPase domain predominantly from Archaea PF01078:Magnesium chelatase, subunit ChlI PF00004:ATPase family associated with various cellular activities (AAA) PF07728:AAA domain (dynein-related subfamily) PF03459:TOBE domain PF00931:NB-ARC domain PF00910:RNA helicase PF02224:Cytidylate kinase PF08402:TOBE domain PF00005:ABC transporter}
MAR44G.1_GM000308	{Scaffold1:347860:348621:-}	{CTQ73560.1; hypothetical protein LAX5112_03577 [Roseibium alexandrii]}	{NA}	{NA}	{NA}	{NA}	{GO:0005215; NA GO:0006810; transport; biological_process}	{NA}	{NA}	{NA}	{NA}	{NA}	{false}	{NA}	{PF00497:Bacterial extracellular solute-binding proteins, family 3}
MAR44G.1_GM000309	{Scaffold1:348926:350077:+}	{WP_055672939.1; DNA alkylation repair protein [Roseibium alexandrii]}	{NA}	{NA}	{WP.077290934.1; COG4335 3-methylpurine DNA glycosylase AlkC L Replication, recombination and repair ;}	{NA}	{GO:0005515; protein binding; molecular_function}	{NA}	{NA}	{NA}	{NA}	{NA}	{false}	{NA}	{PF02985:HEAT repeat}
MAR44G.1_GM000310	{Scaffold1:350074:350706:-}	{WP_008192951.1; GH25 family lysozyme [Roseibium alexandrii]}	{NA}	{labp:FJ695_01385; K07273 acm lysozyme -- --}	{WP.015179176.1; COG3757 Lyzozyme M1 (1,4-beta-N-acetylmuramidase), GH25 family M Cell wall/membrane/envelope biogenesis ;}	{NA}	{GO:0003796; lysozyme activity; molecular_function GO:0016998; cell wall macromolecule catabolic process; biological_process GO:0009253; peptidoglycan catabolic process; biological_process}	{NA}	{NA}	{NA}	{NA}	{NA}	{false}	{QDG74626.1_; GH25 lysozyme (EC 3.2.1.17) }	{PF01183:Glycosyl hydrolases family 25}
MAR44G.1_GM000311	{Scaffold1:350775:351926:-}	{WP_040451362.1; MFS transporter [Roseibium alexandrii]}	{NA}	{NA}	{WP.052743967.1; COG2223 Nitrate/nitrite transporter NarK P Inorganic ion transport and metabolism ;}	{gnl|TC-DB|QFT34603.1; 2.A.1.55.5 Major Facilitator Superfamily protein [Labrenzia sp. THAF82]}	{GO:0016021; integral to membrane; cellular_component GO:0055085; transmembrane transport; biological_process}	{NA}	{NA}	{NA}	{NA}	{NA}	{false}	{NA}	{PF07690:Major Facilitator Superfamily}
MAR44G.1_GM000312	{Scaffold1:351961:352320:-}	{WP_055672942.1; MmcQ/YjbR family DNA-binding protein [Roseibium alexandrii]}	{NA}	{NA}	{WP.077290933.1; COG2315 Predicted DNA-binding protein with ?µdouble-wing?ã structural motif, MmcQ/YjbR family K Transcription ;}	{NA}	{NA}	{NA}	{NA}	{NA}	{NA}	{NA}	{true}	{NA}	{NA}
MAR44G.1_GM000313	{Scaffold1:352541:352759:-}	{OJJ12792.1; hypothetical protein BKI51_01500 [Alphaproteobacteria bacterium AO1-B]}	{NA}	{NA}	{NA}	{NA}	{NA}	{NA}	{NA}	{NA}	{NA}	{NA}	{false}	{NA}	{NA}
MAR44G.1_GM000314	{Scaffold1:352758:353153:+}	{OJJ12793.1; heat-shock protein Hsp20 [Alphaproteobacteria bacterium AO1-B]}	{A8ACK0; Small heat shock protein IbpA }	{NA}	{WP.006934007.1; COG0071 Small heat shock protein IbpA, HSP20 family O Posttranslational modification, protein turnover, chaperones ;}	{NA}	{GO:0016070; RNA metabolic process; biological_process GO:0003723; RNA binding; molecular_function GO:0016788; hydrolase activity, acting on ester bonds; molecular_function GO:0005737; cytoplasm; cellular_component}	{PHI:2658; A9CKC3 hspC 358 Agrobacterium tumefaciens crown gall Solanum tuberosum (related: potato) Alpha-crystallin-type small heat shock proteins Gene deletion: full reduced virulence}	{NA}	{NA}	{NA}	{NA}	{false}	{NA}	{PF08845:Toxin SymE, type I toxin-antitoxin system}
MAR44G.1_GM000315	{Scaffold1:353187:353471:+}	{WP_008193044.1; DUF1150 domain-containing protein [Roseibium alexandrii]}	{NA}	{NA}	{WP.022999641.1; COG5568 Uncharacterized conserved protein, DUF1150 family S Function unknown ;}	{NA}	{GO:0005515; protein binding; molecular_function}	{NA}	{NA}	{NA}	{NA}	{NA}	{false}	{NA}	{PF02845:CUE domain}
MAR44G.1_GM000316	{Scaffold1:353535:354746:-}	{WP_228198207.1; OpgC domain-containing protein [Roseibium alexandrii]}	{NA}	{NA}	{WP.022999642.1; COG4645 Predicted acyltransferase R General function prediction only ;}	{NA}	{NA}	{NA}	{NA}	{NA}	{NA}	{NA}	{false}	{NA}	{NA}
MAR44G.1_GM000317	{Scaffold1:354867:356252:-}	{WP_040451367.1; tetratricopeptide repeat protein [Roseibium alexandrii]}	{NA}	{NA}	{NA}	{NA}	{GO:0005515; protein binding; molecular_function}	{NA}	{NA}	{NA}	{NA}	{NA}	{false}	{NA}	{PF00515:Tetratricopeptide repeat PF13181:Tetratricopeptide repeat PF13174:Tetratricopeptide repeat}
MAR44G.1_GM000318	{Scaffold1:356496:357647:+}	{WP_055672944.1; YeeE/YedE family protein [Roseibium alexandrii]}	{NA}	{labp:FJ695_01340; K07112 K07112 uncharacterized protein -- --}	{WP.086900902.1; COG2391 Uncharacterized membrane protein YedE/YeeE, contains two sulfur transport domains R General function prediction only ;}	{gnl|TC-DB|K2M2W7; 9.B.102.2.4 Uncharacterized protein OS=Thalassospira profundimaris WP0211 GN=TH2_18686 PE=4 SV=1}	{NA}	{NA}	{NA}	{NA}	{NA}	{NA}	{false}	{NA}	{NA}
MAR44G.1_GM000319	{Scaffold1:357906:358226:+}	{WP_055672945.1; DUF302 domain-containing protein [Roseibium alexandrii]}	{NA}	{NA}	{WP.077290927.1; COG3439 Uncharacterized conserved protein, DUF302 family S Function unknown ;}	{NA}	{NA}	{NA}	{NA}	{NA}	{NA}	{NA}	{false}	{NA}	{NA}
MAR44G.1_GM000320	{Scaffold1:358503:359264:-}	{WP_008189443.1; SDR family oxidoreductase [Roseibium alexandrii]}	{Q4A054; Uncharacterized oxidoreductase SSP0419 }	{labp:FJ695_01330; K00059 fabG, OAR1 3-oxoacyl-[acyl-carrier protein] reductase 1.1.1.100 Metabolism; Lipid metabolism; Fatty acid biosynthesis [PATH:ko00061] Metabolism; Metabolism of cofactors and vitamins; Biotin metabolism [PATH:ko00780] Metabolism; Biosynthesis of other secondary metabolites; Prodigiosin biosynthesis [PATH:ko00333]}	{WP.077290926.1; COG4221 NADP-dependent 3-hydroxy acid dehydrogenase YdfG C Energy production and conversion ;}	{NA}	{GO:0016209; NA GO:0003824; NA GO:0044237; cellular metabolic process; biological_process GO:0055114; oxidation-reduction process; biological_process GO:0050662; coenzyme binding; molecular_function GO:0016491; oxidoreductase activity; molecular_function GO:0008152; NA}	{NA}	{NA}	{NA}	{NA}	{NA}	{false}	{NA}	{PF01370:NAD dependent epimerase/dehydratase family PF00578:AhpC/TSA family PF00106:short chain dehydrogenase}
MAR44G.1_GM000321	{Scaffold1:359480:360262:+}	{WP_008197159.1; ion transporter [Roseibium alexandrii]}	{NA}	{labp:FJ695_01325; K10716 kch, trkA, mthK, pch voltage-gated potassium channel -- --}	{WP.011047158.1; COG2051 Ribosomal protein S27E J Translation, ribosomal structure and biogenesis ;}	{NA}	{GO:0005242; inward rectifier potassium channel activity; molecular_function GO:0003735; structural constituent of ribosome; molecular_function GO:0006811; ion transport; biological_process GO:0006412; translation; biological_process GO:0004970; ionotropic glutamate receptor activity; molecular_function GO:0005840; ribosome; cellular_component GO:0006813; potassium ion transport; biological_proce…	{NA}	{NA}	{NA}	{NA}	{NA}	{false}	{NA}	{PF00520:Ion transport protein PF00060:Ligand-gated ion channel PF01007:Inward rectifier potassium channel PF01667:Ribosomal protein S27}
MAR44G.1_GM000322	{Scaffold1:360283:361197:+}	{WP_208981414.1; hypothetical protein [Roseibium alexandrii]}	{NA}	{labp:FJ695_01320; K03932 lpqC polyhydroxybutyrate depolymerase -- --}	{WP.055659318.1; COG3509 Acetyl xylan esterase AxeA and related esterases, LpqC family G Carbohydrate transport and metabolism ;}	{NA}	{GO:0008236; serine-type peptidase activity; molecular_function GO:0006508; proteolysis; biological_process GO:0008152; NA GO:0016787; hydrolase activity; molecular_function}	{NA}	{NA}	{NA}	{NA}	{YES}	{false}	{NA}	{PF00326:Prolyl oligopeptidase family PF07859:alpha/beta hydrolase fold PF02230:Phospholipase/Carboxylesterase PF01738:Dienelactone hydrolase family}
MAR44G.1_GM000323	{Scaffold1:361327:362598:+}	{WP_008194750.1; CaiB/BaiF CoA-transferase family protein [Roseibium alexandrii]}	{Q7CXU0; Succinate--glutarate CoA-transferase }	{labp:FJ695_01315; K01041 gcdG, caiB glutaryl-CoA transferase 2.8.3.- Metabolism; Amino acid metabolism; Lysine degradation [PATH:ko00310]}	{WP.077290924.1; COG1804 Crotonobetainyl-CoA:carnitine CoA-transferase CaiB and related acyl-CoA transferases I Lipid transport and metabolism ;}	{NA}	{GO:0008152; NA GO:0003824; NA}	{NA}	{NA}	{NA}	{NA}	{NA}	{false}	{NA}	{PF02515:CoA-transferase family III}
MAR44G.1_GM000324	{Scaffold1:362605:364221:+}	{WP_008190850.1; thiamine pyrophosphate-binding protein [Roseibium alexandrii]}	{NA}	{labp:FJ695_01310; K01652 E2.2.1.6L, ilvB, ilvG, ilvI acetolactate synthase I/II/III large subunit 2.2.1.6 Metabolism; Carbohydrate metabolism; Butanoate metabolism [PATH:ko00650] Metabolism; Carbohydrate metabolism; C5-Branched dibasic acid metabolism [PATH:ko00660] Metabolism; Amino acid metabolism; Valine, leucine and isoleucine biosynthesis [PATH:ko00290] Metabolism; Metabolism of cofactors a…	{WP.077290923.1; COG0028 Acetolactate synthase large subunit or other thiamine pyrophosphate-requiring enzyme EH Amino acid transport and metabolism ; Coenzyme transport and metabolism ;}	{NA}	{GO:0003824; NA GO:0000287; magnesium ion binding; molecular_function GO:0030976; thiamine pyrophosphate binding; molecular_function}	{NA}	{NA}	{NA}	{NA}	{NA}	{false}	{NA}	{PF00205:Thiamine pyrophosphate enzyme, central domain PF02776:Thiamine pyrophosphate enzyme, N-terminal TPP binding domain PF02775:Thiamine pyrophosphate enzyme, C-terminal TPP binding domain}
MAR44G.1_GM000325	{Scaffold1:364336:365187:+}	{WP_055672949.1; pantoate--beta-alanine ligase [Roseibium alexandrii]}	{A9IRN9; Pantothenate synthetase }	{labp:FJ695_01305; K01918 panC pantoate--beta-alanine ligase 6.3.2.1 Metabolism; Metabolism of other amino acids; beta-Alanine metabolism [PATH:ko00410] Metabolism; Metabolism of cofactors and vitamins; Pantothenate and CoA biosynthesis [PATH:ko00770]}	{WP.077290914.1; COG0414 Panthothenate synthetase H Coenzyme transport and metabolism ;}	{NA}	{GO:0004592; pantoate-beta-alanine ligase activity; molecular_function GO:0009058; biosynthetic process; biological_process GO:0003824; NA GO:0015940; pantothenate biosynthetic process; biological_process}	{NA}	{VFG009302; VF0319 PanC/PanD panC pantoate--beta-alanine ligase nan nan Lipid biosynthesis and metabolism play a pivotal role in the intracellular replication and persistence of M. tuberculosis. Pantothenic acid (vitamin B5) is an essential molecule required for the synthesis of coenzyme A and acyl carrier protein (ACP). PanC (pantothenate synthetase) and PanD (aspartate-1-decarboxylase) involved…	{NA}	{NA}	{NA}	{false}	{NA}	{PF01467:Cytidylyltransferase-like PF02569:Pantoate-beta-alanine ligase}
MAR44G.1_GM000326	{Scaffold1:365226:366035:+}	{WP_055672950.1; 3-methyl-2-oxobutanoate hydroxymethyltransferase [Roseibium alexandrii]}	{A7HYW1; 3-methyl-2-oxobutanoate hydroxymethyltransferase }	{labp:FJ695_01300; K00606 panB 3-methyl-2-oxobutanoate hydroxymethyltransferase 2.1.2.11 Metabolism; Metabolism of cofactors and vitamins; Pantothenate and CoA biosynthesis [PATH:ko00770]}	{WP.077290913.1; COG0413 Ketopantoate hydroxymethyltransferase H Coenzyme transport and metabolism ;}	{NA}	{GO:0003864; 3-methyl-2-oxobutanoate hydroxymethyltransferase activity; molecular_function GO:0015940; pantothenate biosynthetic process; biological_process}	{NA}	{NA}	{NA}	{NA}	{NA}	{false}	{NA}	{PF02548:Ketopantoate hydroxymethyltransferase}
MAR44G.1_GM000327	{Scaffold1:366108:367169:+}	{WP_008191014.1; trifunctional transcriptional activator/DNA repair protein Ada/methylated-DNA--[protein]-cysteine S-methyltransferase [Roseibium alexandrii]}	{P0A697; Methylated-DNA--protein-cysteine methyltransferase }	{labp:FJ695_01285; K10778 ada AraC family transcriptional regulator, regulatory protein of adaptative response / methylated-DNA-[protein]-cysteine methyltransferase 2.1.1.63 --}	{WP.077290912.1; COG2169 Methylphosphotriester-DNA--protein-cysteine methyltransferase (N-terminal fragment of Ada), contains Zn-binding and two AraC-type DNA-binding domains L Replication, recombination and repair ;}	{NA}	{GO:0003824; NA GO:0008168; methyltransferase activity; molecular_function GO:0006281; DNA repair; biological_process GO:0008270; zinc ion binding; molecular_function GO:0003700; sequence-specific DNA binding transcription factor activity; molecular_function GO:0003677; DNA binding; molecular_function GO:0006355; regulation of transcription, DNA-dependent; biological_process GO:0043565; sequence-…	{NA}	{NA}	{NA}	{NA}	{NA}	{false}	{NA}	{PF12833:Helix-turn-helix domain PF01035:6-O-methylguanine DNA methyltransferase, DNA binding domain PF02805:Metal binding domain of Ada}
MAR44G.1_GM000328	{Scaffold1:367787:368383:+}	{WP_008190592.1; 50S ribosomal protein L21 [Roseibium alexandrii]}	{Q165Y2; 50S ribosomal protein L21 }	{labp:FJ695_01250; K02888 RP-L21, MRPL21, rplU large subunit ribosomal protein L21 -- Genetic Information Processing; Translation; Ribosome [PATH:ko03010]}	{WP.023014642.1; COG3743 Predicted 5' DNA nuclease, flap endonuclease-1-like, helix-3-turn-helix (H3TH) domain L Replication, recombination and repair ;}	{NA}	{NA}	{NA}	{NA}	{NA}	{NA}	{NA}	{false}	{NA}	{NA}
MAR44G.1_GM000329	{Scaffold1:368440:368709:+}	{WP_008192734.1; MULTISPECIES: 50S ribosomal protein L27 [Stappiaceae]}	{Q2J3K2; 50S ribosomal protein L27 }	{labp:FJ695_01245; K02899 RP-L27, MRPL27, rpmA large subunit ribosomal protein L27 -- Genetic Information Processing; Translation; Ribosome [PATH:ko03010]}	{WP.006933726.1; COG0211 Ribosomal protein L27 J Translation, ribosomal structure and biogenesis ;}	{NA}	{GO:0006412; translation; biological_process GO:0003735; structural constituent of ribosome; molecular_function GO:0005622; intracellular; cellular_component GO:0005840; ribosome; cellular_component}	{NA}	{NA}	{NA}	{NA}	{NA}	{false}	{NA}	{PF01016:Ribosomal L27 protein}
MAR44G.1_GM000330	{Scaffold1:368806:369456:+}	{WP_040451371.1; GNAT family N-acetyltransferase [Roseibium alexandrii]}	{NA}	{NA}	{WP.023001687.1; COG1670 Protein N-acetyltransferase, RimJ/RimL family JO Translation, ribosomal structure and biogenesis ; Posttranslational modification, protein turnover, chaperones ;}	{NA}	{GO:0008080; N-acetyltransferase activity; molecular_function}	{NA}	{NA}	{NA}	{NA}	{NA}	{false}	{NA}	{PF13302:Acetyltransferase (GNAT) domain PF00583:Acetyltransferase (GNAT) family}
MAR44G.1_GM000331	{Scaffold1:369453:370022:+}	{WP_055673014.1; GNAT family N-acetyltransferase [Roseibium alexandrii]}	{NA}	{labp:FJ695_01235; K03790 rimJ [ribosomal protein S5]-alanine N-acetyltransferase 2.3.1.267 --}	{WP.023001686.1; COG1670 Protein N-acetyltransferase, RimJ/RimL family JO Translation, ribosomal structure and biogenesis ; Posttranslational modification, protein turnover, chaperones ;}	{NA}	{GO:0008080; N-acetyltransferase activity; molecular_function}	{NA}	{NA}	{NA}	{NA}	{NA}	{false}	{NA}	{PF13302:Acetyltransferase (GNAT) domain PF00583:Acetyltransferase (GNAT) family}
MAR44G.1_GM000332	{Scaffold1:370019:370561:+}	{WP_196220564.1; GNAT family N-acetyltransferase [Roseibium denhamense]}	{NA}	{NA}	{WP.013654862.1; COG1670 Protein N-acetyltransferase, RimJ/RimL family JO Translation, ribosomal structure and biogenesis ; Posttranslational modification, protein turnover, chaperones ;}	{NA}	{GO:0008080; N-acetyltransferase activity; molecular_function}	{NA}	{NA}	{NA}	{NA}	{NA}	{false}	{NA}	{PF13302:Acetyltransferase (GNAT) domain PF00583:Acetyltransferase (GNAT) family}
MAR44G.1_GM000333	{Scaffold1:370558:370941:+}	{WP_055672965.1; GNAT family N-acetyltransferase [Roseibium alexandrii]}	{NA}	{NA}	{WP.077290570.1; COG1670 Protein N-acetyltransferase, RimJ/RimL family JO Translation, ribosomal structure and biogenesis ; Posttranslational modification, protein turnover, chaperones ;}	{NA}	{GO:0008080; N-acetyltransferase activity; molecular_function}	{NA}	{NA}	{NA}	{NA}	{NA}	{false}	{NA}	{PF13302:Acetyltransferase (GNAT) domain PF00583:Acetyltransferase (GNAT) family}
MAR44G.1_GM000334	{Scaffold1:370988:372034:+}	{WP_055672966.1; GTPase ObgE [Roseibium alexandrii]}	{B0UMS4; GTPase Obg }	{labp:FJ695_01225; K03979 obgE, cgtA, MTG2 GTPase 3.6.5.- --}	{WP.023001684.1; COG0536 GTPase involved in cell partioning and DNA repair DL Cell cycle control, cell division, chromosome partitioning ; Replication, recombination and repair ;}	{NA}	{GO:0015684; ferrous iron transport; biological_process GO:0015093; ferrous iron transmembrane transporter activity; molecular_function GO:0016021; integral to membrane; cellular_component GO:0005525; GTP binding; molecular_function}	{NA}	{NA}	{NA}	{NA}	{NA}	{false}	{NA}	{PF01926:50S ribosome-binding GTPase PF00025:ADP-ribosylation factor family PF01018:GTP1/OBG PF02421:Ferrous iron transport protein B}
MAR44G.1_GM000335	{Scaffold1:372034:373173:+}	{WP_040451373.1; glutamate 5-kinase [Roseibium alexandrii]}	{Q8UBS0; Glutamate 5-kinase }	{labp:FJ695_01220; K00931 proB glutamate 5-kinase 2.7.2.11 Metabolism; Amino acid metabolism; Arginine and proline metabolism [PATH:ko00330] Metabolism; Biosynthesis of other secondary metabolites; Carbapenem biosynthesis [PATH:ko00332]}	{WP.077290569.1; COG0263 Glutamate 5-kinase E Amino acid transport and metabolism ;}	{NA}	{GO:0008152; NA GO:0055114; oxidation-reduction process; biological_process GO:0050660; flavin adenine dinucleotide binding; molecular_function GO:0016627; oxidoreductase activity, acting on the CH-CH group of donors; molecular_function GO:0003723; RNA binding; molecular_function}	{NA}	{NA}	{NA}	{NA}	{NA}	{false}	{NA}	{PF02771:Acyl-CoA dehydrogenase, N-terminal domain PF01472:PUA domain}
MAR44G.1_GM000336	{Scaffold1:373226:374506:+}	{WP_008195335.1; glutamate-5-semialdehyde dehydrogenase [Roseibium alexandrii]}	{B9JUH7; Gamma-glutamyl phosphate reductase }	{labp:FJ695_01215; K00147 proA glutamate-5-semialdehyde dehydrogenase 1.2.1.41 Metabolism; Amino acid metabolism; Arginine and proline metabolism [PATH:ko00330] Metabolism; Biosynthesis of other secondary metabolites; Carbapenem biosynthesis [PATH:ko00332]}	{WP.077290568.1; COG0014 Gamma-glutamyl phosphate reductase E Amino acid transport and metabolism ;}	{NA}	{GO:0055114; oxidation-reduction process; biological_process GO:0008152; NA GO:0016491; oxidoreductase activity; molecular_function}	{NA}	{NA}	{NA}	{NA}	{NA}	{false}	{NA}	{PF00171:Aldehyde dehydrogenase family}
MAR44G.1_GM000337	{Scaffold1:374503:375132:+}	{WP_055672969.1; nicotinate-nucleotide adenylyltransferase [Roseibium alexandrii]}	{Q92LB1; Probable nicotinate-nucleotide adenylyltransferase }	{labp:FJ695_01210; K00969 nadD nicotinate-nucleotide adenylyltransferase 2.7.7.18 Metabolism; Metabolism of cofactors and vitamins; Nicotinate and nicotinamide metabolism [PATH:ko00760]}	{WP.077290567.1; COG1057 Nicotinate-nucleotide adenylyltransferase NadD H Coenzyme transport and metabolism ;}	{NA}	{GO:0003824; NA GO:0009058; biosynthetic process; biological_process}	{NA}	{NA}	{NA}	{NA}	{NA}	{false}	{NA}	{PF01467:Cytidylyltransferase-like}
MAR44G.1_GM000338	{Scaffold1:375341:375751:+}	{OJJ12813.1; ribosome silencing factor [Alphaproteobacteria bacterium AO1-B]}	{Q5NLX3; Ribosomal silencing factor RsfS }	{labp:FJ695_01205; K09710 ybeB ribosome-associated protein -- --}	{WP.031269617.1; COG0799 Ribosomal silencing factor RsfS, regulates association of 30S and 50S subunits J Translation, ribosomal structure and biogenesis ;}	{NA}	{NA}	{NA}	{NA}	{NA}	{NA}	{NA}	{false}	{NA}	{NA}
MAR44G.1_GM000339	{Scaffold1:375835:376317:+}	{WP_055672970.1; 23S rRNA (pseudouridine(1915)-N(3))-methyltransferase RlmH [Roseibium alexandrii]}	{A8HS37; Ribosomal RNA large subunit methyltransferase H }	{labp:FJ695_01200; K00783 rlmH 23S rRNA (pseudouridine1915-N3)-methyltransferase 2.1.1.177 --}	{WP.023001679.1; COG1576 23S rRNA pseudoU1915 N3-methylase RlmH J Translation, ribosomal structure and biogenesis ;}	{NA}	{GO:0005737; cytoplasm; cellular_component GO:0006364; rRNA processing; biological_process GO:0008168; methyltransferase activity; molecular_function}	{NA}	{NA}	{NA}	{NA}	{NA}	{false}	{NA}	{PF02590:Predicted SPOUT methyltransferase}
MAR44G.1_GM000340	{Scaffold1:376600:377880:+}	{WP_209002620.1; peptidoglycan DD-metalloendopeptidase family protein [Roseibium alexandrii]}	{NA}	{labp:FJ695_01195; K22719 envC murein hydrolase activator -- --}	{WP.055658261.1; COG4942 Septal ring factor EnvC, activator of murein hydrolases AmiA and AmiB D Cell cycle control, cell division, chromosome partitioning ;}	{NA}	{GO:0005604; basement membrane; cellular_component GO:0007155; cell adhesion; biological_process GO:0030168; platelet activation; biological_process GO:0042803; protein homodimerization activity; molecular_function GO:0007165; signal transduction; biological_process GO:0045502; dynein binding; molecular_function GO:0051258; protein polymerization; biological_process GO:0005634; nucleus; cellular_…	{NA}	{NA}	{NA}	{NA}	{NA}	{false}	{NA}	{PF08702:Fibrinogen alpha/beta chain family PF10473:Leucine-rich repeats of kinetochore protein Cenp-F/LEK1 PF06009:Laminin Domain II PF11802:Centromere-associated protein K}
MAR44G.1_GM000341	{Scaffold1:377877:379208:+}	{WP_040451378.1; S41 family peptidase [Roseibium alexandrii]}	{Q44879; Carboxy-terminal-processing protease }	{labp:FJ695_01190; K03797 E3.4.21.102, prc, ctpA carboxyl-terminal processing protease 3.4.21.102 --}	{WP.023001676.1; COG0793 C-terminal processing protease CtpA/Prc, contains a PDZ domain O Posttranslational modification, protein turnover, chaperones ;}	{NA}	{GO:0006508; proteolysis; biological_process GO:0008236; serine-type peptidase activity; molecular_function GO:0005515; protein binding; molecular_function}	{NA}	{NA}	{NA}	{NA}	{NA}	{false}	{NA}	{PF00595:PDZ domain (Also known as DHR or GLGF) PF13180:PDZ domain PF03572:Peptidase family S41}
MAR44G.1_GM000342	{Scaffold1:379345:380463:+}	{WP_209002618.1; divergent polysaccharide deacetylase family protein [Roseibium alexandrii]}	{NA}	{labp:FJ695_01185; K09798 K09798 uncharacterized protein -- --}	{WP.023001675.1; COG2861 Uncharacterized conserved protein YibQ, putative polysaccharide deacetylase 2 family G Carbohydrate transport and metabolism ;}	{NA}	{NA}	{NA}	{NA}	{NA}	{NA}	{NA}	{false}	{NA}	{NA}
MAR44G.1_GM000343	{Scaffold1:380520:381050:+}	{WP_040451382.1; RNA pyrophosphohydrolase [Roseibium alexandrii]}	{A6WXT0; RNA pyrophosphohydrolase }	{labp:FJ695_01180; K08311 nudH putative (di)nucleoside polyphosphate hydrolase 3.6.1.- Genetic Information Processing; Folding, sorting and degradation; RNA degradation [PATH:ko03018]}	{WP.055658263.1; COG0494 8-oxo-dGTP pyrophosphatase MutT and related house-cleaning NTP pyrophosphohydrolases, NUDIX family V Defense mechanisms ;}	{NA}	{GO:0016787; hydrolase activity; molecular_function}	{PHI:4915; Q8YJ71 invA 29459 Brucella melitensis brucellosis Mus musculus (related: house mouse) Invasion and establishment of infection Gene disruption; gene complementation reduced virulence}	{NA}	{NA}	{NA}	{NA}	{false}	{NA}	{PF00293:NUDIX domain}
MAR44G.1_GM000344	{Scaffold1:381062:381151:+}	{NA}	{NA}	{NA}	{NA}	{NA}	{NA}	{NA}	{NA}	{NA}	{NA}	{NA}	{false}	{NA}	{NA}
MAR44G.1_GM000345	{Scaffold1:381189:382865:+}	{WP_008189663.1; NAD(P)H-dependent oxidoreductase subunit E [Roseibium alexandrii]}	{P56913; NADH-quinone oxidoreductase subunit F 2 }	{labp:FJ695_01175; K22515 fdwB formate dehydrogenase beta subunit 1.17.1.9 Metabolism; Carbohydrate metabolism; Glyoxylate and dicarboxylate metabolism [PATH:ko00630] Metabolism; Energy metabolism; Methane metabolism [PATH:ko00680]}	{WP.077290565.1; COG1905 NADH:ubiquinone oxidoreductase 24 kD subunit (chain E) C Energy production and conversion ;}	{gnl|TC-DB|P25708; 3.D.1.6.1 NADH dehydrogenase [ubiquinone] flavoprotein 1, mitochondrial - Bos taurus (Bovine).}	{GO:0051539; 4 iron, 4 sulfur cluster binding; molecular_function GO:0000160; two-component signal transduction system (phosphorelay); biological_process GO:0016651; oxidoreductase activity, acting on NADH or NADPH; molecular_function GO:0004871; signal transducer activity; molecular_function GO:0016491; oxidoreductase activity; molecular_function GO:0055114; oxidation-reduction process; biologic…	{NA}	{NA}	{NA}	{NA}	{NA}	{false}	{NA}	{PF01257:Thioredoxin-like [2Fe-2S] ferredoxin PF01627:Hpt domain PF01512:Respiratory-chain NADH dehydrogenase 51 Kd subunit PF10589:NADH-ubiquinone oxidoreductase-F iron-sulfur binding region}
MAR44G.1_GM000346	{Scaffold1:382862:385630:+}	{WP_055672975.1; formate dehydrogenase subunit alpha [Roseibium alexandrii]}	{P61159; Formate dehydrogenase subunit alpha }	{labp:FJ695_01170; K00123 fdoG, fdhF, fdwA formate dehydrogenase major subunit 1.17.1.9 Metabolism; Carbohydrate metabolism; Glyoxylate and dicarboxylate metabolism [PATH:ko00630] Metabolism; Energy metabolism; Methane metabolism [PATH:ko00680]}	{WP.077290564.1; COG3383 Predicted molibdopterin-dependent oxidoreductase YjgC R General function prediction only ;}	{NA}	{GO:0005975; carbohydrate metabolic process; biological_process GO:0009055; NA GO:0000287; magnesium ion binding; molecular_function GO:0030976; thiamine pyrophosphate binding; molecular_function GO:0016491; oxidoreductase activity; molecular_function GO:0030151; molybdenum ion binding; molecular_function GO:0051536; iron-sulfur cluster binding; molecular_function GO:0030246; carbohydrate binding…	{NA}	{NA}	{NA}	{NA}	{NA}	{true}	{NA}	{PF13237:4Fe-4S dicluster domain PF13183:4Fe-4S dicluster domain PF01380:SIS domain PF00205:Thiamine pyrophosphate enzyme, central domain PF12800:4Fe-4S binding domain PF01568:Molydopterin dinucleotide binding domain PF04879:Molybdopterin oxidoreductase Fe4S4 domain PF13187:4Fe-4S dicluster domain PF00384:Molybdopterin oxidoreductase PF12837:4Fe-4S binding domain PF00037:4Fe-4S binding domain PF1…
MAR44G.1_GM000347	{Scaffold1:385700:387811:-}	{CTQ73691.1; hypothetical protein LAX5112_03626 [Roseibium alexandrii]}	{NA}	{NA}	{NA}	{NA}	{NA}	{NA}	{NA}	{NA}	{NA}	{YES}	{false}	{NA}	{NA}
MAR44G.1_GM000348	{Scaffold1:387995:389134:-}	{CTQ73694.1; Epoxyqueuosine reductase [Roseibium alexandrii]}	{F7ZDR3; Epoxyqueuosine reductase }	{labp:FJ695_01160; K18979 queG epoxyqueuosine reductase 1.17.99.6 --}	{WP.077290562.1; COG1600 Epoxyqueuosine reductase QueG (queuosine biosynthesis) J Translation, ribosomal structure and biogenesis ;}	{NA}	{GO:0005515; protein binding; molecular_function GO:0051536; iron-sulfur cluster binding; molecular_function}	{NA}	{NA}	{NA}	{NA}	{NA}	{false}	{NA}	{PF02985:HEAT repeat PF00037:4Fe-4S binding domain PF12837:4Fe-4S binding domain PF12797:4Fe-4S binding domain PF12798:4Fe-4S binding domain PF12838:4Fe-4S dicluster domain PF13237:4Fe-4S dicluster domain PF13183:4Fe-4S dicluster domain PF12800:4Fe-4S binding domain PF13187:4Fe-4S dicluster domain}
MAR44G.1_GM000349	{Scaffold1:389153:389845:-}	{WP_008193981.1; glutathione S-transferase family protein [Roseibium alexandrii]}	{A0A0H3CDY2; FtsZ-localized protein A }	{labp:FJ695_01155; K00799 GST, gst glutathione S-transferase 2.5.1.18 Metabolism; Metabolism of other amino acids; Glutathione metabolism [PATH:ko00480] Metabolism; Xenobiotics biodegradation and metabolism; Metabolism of xenobiotics by cytochrome P450 [PATH:ko00980] Metabolism; Xenobiotics biodegradation and metabolism; Drug metabolism - cytochrome P450 [PATH:ko00982] Metabolism; Xenobiotics bio…	{WP.023001669.1; COG0625 Glutathione S-transferase O Posttranslational modification, protein turnover, chaperones ;}	{NA}	{GO:0005515; protein binding; molecular_function}	{NA}	{NA}	{NA}	{NA}	{NA}	{false}	{NA}	{PF02798:Glutathione S-transferase, N-terminal domain PF13417:Glutathione S-transferase, N-terminal domain PF13409:Glutathione S-transferase, N-terminal domain}
MAR44G.1_GM000350	{Scaffold1:390037:390843:+}	{WP_040451386.1; undecaprenyl-diphosphate phosphatase [Roseibium alexandrii]}	{B2SC28; Undecaprenyl-diphosphatase }	{labr:CHH27_23230; K06153 bacA undecaprenyl-diphosphatase 3.6.1.27 Metabolism; Glycan biosynthesis and metabolism; Peptidoglycan biosynthesis [PATH:ko00550] Metabolism; Glycan biosynthesis and metabolism; Teichoic acid biosynthesis [PATH:ko00552]}	{WP.023001668.1; COG1968 Undecaprenyl pyrophosphate phosphatase I Lipid transport and metabolism ;}	{NA}	{GO:0050380; undecaprenyl-diphosphatase activity; molecular_function GO:0016311; dephosphorylation; biological_process GO:0016020; membrane; cellular_component}	{NA}	{NA}	{ardb_2232; baca 30 -- bacitracin baca Undecaprenyl pyrophosphate phosphatase, which consists in the sequestration of Undecaprenyl pyrophosphate. }	{ARO:3002986; bacA 196.823 determinant of resistance to peptide antibiotics, protein(s) conferring antibiotic resistance via molecular bypass }	{NA}	{false}	{NA}	{PF02673:Bacitracin resistance protein BacA}
MAR44G.1_GM000351	{Scaffold1:390835:391860:-}	{WP_055672979.1; WYL domain-containing protein [Roseibium alexandrii]}	{NA}	{NA}	{WP.077290561.1; COG2378 Predicted DNA-binding transcriptional regulator YobV, contains HTH and WYL domains K Transcription ;}	{NA}	{GO:0006355; regulation of transcription, DNA-dependent; biological_process GO:0005622; intracellular; cellular_component GO:0003700; sequence-specific DNA binding transcription factor activity; molecular_function}	{NA}	{NA}	{NA}	{NA}	{NA}	{false}	{NA}	{PF08220:DeoR-like helix-turn-helix domain}
MAR44G.1_GM000352	{Scaffold1:392009:392245:+}	{OJJ12824.1; hypothetical protein BKI51_01705 [Alphaproteobacteria bacterium AO1-B]}	{NA}	{NA}	{NA}	{NA}	{NA}	{NA}	{NA}	{NA}	{NA}	{NA}	{false}	{NA}	{NA}
MAR44G.1_GM000353	{Scaffold1:392270:393523:-}	{WP_008193108.1; MFS transporter [Roseibium alexandrii]}	{NA}	{labt:FIU93_27370; K08151 tetA MFS transporter, DHA1 family, tetracycline resistance protein -- --}	{WP.077290560.1; COG2814 Predicted arabinose efflux permease AraJ, MFS family G Carbohydrate transport and metabolism ;}	{NA}	{GO:0016021; integral to membrane; cellular_component GO:0055085; transmembrane transport; biological_process GO:0022857; transmembrane transporter activity; molecular_function GO:0022900; electron transport chain; biological_process}	{NA}	{NA}	{NA}	{NA}	{NA}	{false}	{NA}	{PF00083:Sugar (and other) transporter PF07690:Major Facilitator Superfamily PF02790:Cytochrome C oxidase subunit II, transmembrane domain}
MAR44G.1_GM000354	{Scaffold1:393637:394617:-}	{WP_008195775.1; complex I NDUFA9 subunit family protein [Roseibium alexandrii]}	{NA}	{NA}	{WP.077293145.1; COG0702 Uncharacterized conserved protein YbjT, contains NAD(P)-binding and DUF2867 domains R General function prediction only ;}	{NA}	{GO:0050662; coenzyme binding; molecular_function GO:0016491; oxidoreductase activity; molecular_function GO:0045226; extracellular polysaccharide biosynthetic process; biological_process GO:0008831; dTDP-4-dehydrorhamnose reductase activity; molecular_function GO:0003824; NA GO:0015031; protein transport; biological_process GO:0008565; protein transporter activity; molecular_function GO:0008152;…	{NA}	{NA}	{NA}	{NA}	{NA}	{false}	{NA}	{PF02416:mttA/Hcf106 family PF01073:3-beta hydroxysteroid dehydrogenase/isomerase family PF03435:Saccharopine dehydrogenase NADP binding domain PF04321:RmlD substrate binding domain PF01370:NAD dependent epimerase/dehydratase family PF00106:short chain dehydrogenase}
MAR44G.1_GM000355	{Scaffold1:394890:395129:-}	{NA}	{NA}	{NA}	{NA}	{NA}	{GO:0017009; protein-phycocyanobilin linkage; biological_process}	{NA}	{NA}	{NA}	{NA}	{NA}	{false}	{NA}	{PF06206:CpeT/CpcT family (DUF1001)}
MAR44G.1_GM000356	{Scaffold1:395658:400952:+}	{OJJ12826.1; hypothetical protein BKI51_01725 [Alphaproteobacteria bacterium AO1-B]}	{NA}	{tvi:Thivi_3786; K07004 K07004 uncharacterized protein -- --}	{WP.086013624.1; COG2374 Predicted extracellular nuclease R General function prediction only ;}	{NA}	{GO:0003676; nucleic acid binding; molecular_function GO:0016787; hydrolase activity; molecular_function GO:0009166; nucleotide catabolic process; biological_process}	{NA}	{NA}	{NA}	{NA}	{NA}	{false}	{NA}	{PF01336:OB-fold nucleic acid binding domain PF02872:5'-nucleotidase, C-terminal domain}
MAR44G.1_GM000357	{Scaffold1:401265:401663:+}	{WP_055672982.1; Cu(I)-responsive transcriptional regulator [Roseibium alexandrii]}	{Q9X5V4; HTH-type transcriptional regulator HmrR }	{lagg:B0E33_04550; K19591 cueR MerR family transcriptional regulator, copper efflux regulator -- --}	{WP.055658337.1; COG0789 DNA-binding transcriptional regulator, MerR family K Transcription ;}	{NA}	{GO:0004812; aminoacyl-tRNA ligase activity; molecular_function GO:0006418; tRNA aminoacylation for protein translation; biological_process GO:0003677; DNA binding; molecular_function GO:0006355; regulation of transcription, DNA-dependent; biological_process GO:0005524; ATP binding; molecular_function}	{NA}	{NA}	{NA}	{ARO:3000504; golS 126.716 efflux pump complex or subunit conferring antibiotic resistance, protein(s) and two-component regulatory system modulating antibiotic efflux }	{NA}	{false}	{NA}	{PF13411:MerR HTH family regulatory protein PF00376:MerR family regulatory protein PF00458:WHEP-TRS domain}
MAR44G.1_GM000358	{Scaffold1:401785:402246:+}	{WP_055672983.1; cytochrome c [Roseibium alexandrii]}	{NA}	{NA}	{WP.055661046.1; COG3909 Cytochrome c556 C Energy production and conversion ;}	{NA}	{GO:0009055; NA GO:0020037; heme binding; molecular_function GO:0055114; oxidation-reduction process; biological_process GO:0051920; peroxiredoxin activity; molecular_function GO:0005506; iron ion binding; molecular_function}	{NA}	{NA}	{NA}	{NA}	{NA}	{false}	{NA}	{PF02627:Carboxymuconolactone decarboxylase family PF01322:Cytochrome C'}
MAR44G.1_GM000359	{Scaffold1:402334:403005:+}	{WP_040452779.1; ribonuclease D [Roseibium alexandrii]}	{NA}	{lagg:B0E33_04540; K03684 rnd ribonuclease D 3.1.13.5 --}	{WP.031269608.1; COG0349 Ribonuclease D J Translation, ribosomal structure and biogenesis ;}	{NA}	{GO:0006139; nucleobase, nucleoside, nucleotide and nucleic acid metabolic process; biological_process GO:0003676; nucleic acid binding; molecular_function GO:0008408; 3'-5' exonuclease activity; molecular_function}	{NA}	{NA}	{NA}	{NA}	{NA}	{false}	{NA}	{PF01612:3'-5' exonuclease}
MAR44G.1_GM000360	{Scaffold1:403152:403718:+}	{EEE42962.2; Uncharacterized protein SADFL11_248 [Roseibium alexandrii DFL-11]}	{NA}	{labp:FJ695_01115; K11719 lptC lipopolysaccharide export system protein LptC -- --}	{WP.031285205.1; COG5375 Uncharacterized conserved protein S Function unknown ;}	{NA}	{NA}	{NA}	{NA}	{NA}	{NA}	{NA}	{false}	{NA}	{NA}
MAR44G.1_GM000361	{Scaffold1:403715:404296:+}	{WP_055672984.1; LptA/OstA family protein [Roseibium alexandrii]}	{NA}	{labp:FJ695_01110; K09774 lptA lipopolysaccharide export system protein LptA -- --}	{WP.023001649.1; COG1934 Lipopolysaccharide export system protein LptA M Cell wall/membrane/envelope biogenesis ;}	{NA}	{NA}	{NA}	{NA}	{NA}	{NA}	{YES}	{false}	{NA}	{NA}
MAR44G.1_GM000362	{Scaffold1:404392:405174:+}	{EEE45603.2; ABC-type (unclassified) transport system, ATPase component [Roseibium alexandrii DFL-11]}	{P33982; Probable ABC transporter ATP-binding protein AZC_3926 }	{labp:FJ695_01105; K06861 lptB lipopolysaccharide export system ATP-binding protein 7.5.2.5 Environmental Information Processing; Membrane transport; ABC transporters [PATH:ko02010]}	{WP.023001648.1; COG1137 ABC-type lipopolysaccharide export system, ATPase component M Cell wall/membrane/envelope biogenesis ;}	{gnl|TC-DB|Q9HVV6; 3.A.1.152.1 Probable ATP-binding component of ABC transporter OS=Pseudomonas aeruginosa (strain ATCC 15692 / DSM 22644 / CIP 104116 / JCM 14847 / LMG 12228 / 1C / PRS 101 / PAO1) GN=PA4461 PE=1 SV=1}	{GO:0005524; ATP binding; molecular_function GO:0005525; GTP binding; molecular_function GO:0006614; SRP-dependent cotranslational protein targeting to membrane; biological_process GO:0016887; ATPase activity; molecular_function}	{NA}	{NA}	{NA}	{ARO:3003748, ARO:3003980, ARO:3002987; oleC, tetA(48), bcrA 130.568, 132.494, 116.701 efflux pump complex or subunit conferring antibiotic resistance }	{NA}	{false}	{NA}	{PF00448:SRP54-type protein, GTPase domain PF00005:ABC transporter}
MAR44G.1_GM000363	{Scaffold1:405257:406819:+}	{WP_055672985.1; RNA polymerase factor sigma-54 [Roseibium alexandrii]}	{P33984; RNA polymerase sigma-54 factor }	{labp:FJ695_01100; K03092 rpoN RNA polymerase sigma-54 factor -- Environmental Information Processing; Signal transduction; Two-component system [PATH:ko02020] Cellular Processes; Cellular community - prokaryotes; Biofilm formation - Vibrio cholerae [PATH:ko05111] Cellular Processes; Cell motility; Flagellar assembly [PATH:ko02040]}	{WP.077290552.1; COG1508 DNA-directed RNA polymerase specialized sigma subunit, sigma54 homolog K Transcription ;}	{NA}	{GO:0006352; transcription initiation, DNA-dependent; biological_process GO:0003899; DNA-directed RNA polymerase activity; molecular_function GO:0016987; sigma factor activity; molecular_function GO:0005622; intracellular; cellular_component GO:0003677; DNA binding; molecular_function GO:0003700; sequence-specific DNA binding transcription factor activity; molecular_function GO:0006355; regulatio…	{NA}	{NA}	{NA}	{NA}	{NA}	{false}	{NA}	{PF04963:Sigma-54 factor, core binding domain PF01047:MarR family PF09339:IclR helix-turn-helix domain PF00309:Sigma-54 factor, Activator interacting domain (AID) PF01316:Arginine repressor, DNA binding domain}
MAR44G.1_GM000364	{Scaffold1:407122:407709:+}	{WP_040451389.1; ribosome-associated translation inhibitor RaiA [Roseibium alexandrii]}	{P17265; Ribosome hibernation promotion factor }	{NA}	{WP.023001646.1; COG1544 Ribosome-associated translation inhibitor RaiA J Translation, ribosomal structure and biogenesis ;}	{NA}	{GO:0044238; primary metabolic process; biological_process}	{NA}	{NA}	{NA}	{NA}	{NA}	{false}	{NA}	{PF02482:Sigma 54 modulation protein / S30EA ribosomal protein}
MAR44G.1_GM000365	{Scaffold1:407778:408245:+}	{OJJ12835.1; PTS IIA-like nitrogen-regulatory protein PtsN [Alphaproteobacteria bacterium AO1-B]}	{P30335; Nitrogen regulatory protein }	{labp:FJ695_01090; K02806 ptsN nitrogen PTS system EIIA component 2.7.1.- Environmental Information Processing; Membrane transport; Phosphotransferase system (PTS) [PATH:ko02060]}	{WP.023001645.1; COG1762 Phosphotransferase system mannitol/fructose-specific IIA domain (Ntr-type) GT Carbohydrate transport and metabolism ; Signal transduction mechanisms ;}	{NA}	{GO:0008509; anion transmembrane transporter activity; molecular_function GO:0006820; anion transport; biological_process GO:0016021; integral to membrane; cellular_component}	{PHI:3133; Q665I9 ptsN 633 Yersinia pseudotuberculosis gut-associated disease; diarrhea; enteritis; colitis Mus musculus (related: house mouse) Part of the pyruvate - tricarboxylic acid cycle node Gene disruption reduced virulence}	{NA}	{NA}	{NA}	{NA}	{false}	{NA}	{PF07565:Band 3 cytoplasmic domain}
MAR44G.1_GM000366	{Scaffold1:408305:410137:-}	{WP_268873426.1; glucans biosynthesis glucosyltransferase MdoH [Roseibium alexandrii]}	{NA}	{labp:FJ695_01085; K03669 mdoH membrane glycosyltransferase 2.4.1.- --}	{WP.077290551.1; COG2943 Membrane glycosyltransferase MG Cell wall/membrane/envelope biogenesis ; Carbohydrate transport and metabolism ;}	{NA}	{GO:0016757; transferase activity, transferring glycosyl groups; molecular_function}	{NA}	{NA}	{NA}	{NA}	{NA}	{false}	{QDG74576.1_; GT2 cellulose synthase (EC 2.4.1.12); chitin synthase (EC 2.4.1.16); dolichyl-phosphate beta-D-mannosyltransferase (EC 2.4.1.83); dolichyl-phosphate beta-glucosyltransferase (EC 2.4.1.117); N-acetylglucosaminyltransferase (EC 2.4.1.-); N-acetylgalactosaminyltransferase (EC 2.4.1.-); hyaluronan synthase (EC 2.4.1.212); chitin oligosaccharide synthase (EC 2.4.1.-); beta-1,3-glucan syn…	{PF13506:Glycosyl transferase family 21}
MAR44G.1_GM000367	{Scaffold1:410235:411248:+}	{WP_008193265.1; zinc-binding alcohol dehydrogenase [Roseibium alexandrii]}	{NA}	{NA}	{WP.077290550.1; COG1063 Threonine dehydrogenase or related Zn-dependent dehydrogenase ER Amino acid transport and metabolism ; General function prediction only ;}	{NA}	{GO:0008270; zinc ion binding; molecular_function GO:0006631; fatty acid metabolic process; biological_process GO:0016491; oxidoreductase activity; molecular_function GO:0006813; potassium ion transport; biological_process GO:0055114; oxidation-reduction process; biological_process GO:0016616; oxidoreductase activity, acting on the CH-OH group of donors, NAD or NADP as acceptor; molecular_functio…	{NA}	{NA}	{NA}	{NA}	{NA}	{false}	{NA}	{PF00070:Pyridine nucleotide-disulphide oxidoreductase PF03721:UDP-glucose/GDP-mannose dehydrogenase family, NAD binding domain PF01266:FAD dependent oxidoreductase PF00107:Zinc-binding dehydrogenase PF02737:3-hydroxyacyl-CoA dehydrogenase, NAD binding domain PF07992:Pyridine nucleotide-disulphide oxidoreductase PF02558:Ketopantoate reductase PanE/ApbA PF02254:TrkA-N domain}
MAR44G.1_GM000368	{Scaffold1:411290:411688:+}	{WP_055672990.1; 6-carboxytetrahydropterin synthase [Roseibium alexandrii]}	{NA}	{NA}	{WP.077290549.1; COG0720 6-pyruvoyl-tetrahydropterin synthase H Coenzyme transport and metabolism ;}	{NA}	{GO:0036094; NA}	{NA}	{NA}	{NA}	{NA}	{NA}	{false}	{NA}	{PF02829:3H domain}
MAR44G.1_GM000369	{Scaffold1:411690:412748:+}	{WP_055672991.1; glycosyltransferase family 4 protein [Roseibium alexandrii]}	{NA}	{NA}	{WP.077290548.1; COG0438 Glycosyltransferase involved in cell wall bisynthesis M Cell wall/membrane/envelope biogenesis ;}	{NA}	{GO:0009058; biosynthetic process; biological_process}	{NA}	{NA}	{NA}	{NA}	{NA}	{false}	{QDG74573.1_; GT4 sucrose synthase (EC 2.4.1.13); sucrose-phosphate synthase (EC 2.4.1.14); alpha-glucosyltransferase (EC 2.4.1.52); lipopolysaccharide N-acetylglucosaminyltransferase (EC 2.4.1.56); phosphatidylinositol alpha-mannosyltransferase (EC 2.4.1.57); GDP-Man: Man1GlcNAc2-PP-dolichol alpha-1,3-mannosyltransferase (EC 2.4.1.132); GDP-Man: Man3GlcNAc2-PP-dolichol/Man4GlcNAc2-PP-dolichol al…	{PF00534:Glycosyl transferases group 1}
MAR44G.1_GM000370	{Scaffold1:412745:413539:+}	{WP_050776032.1; class I SAM-dependent methyltransferase [Roseibium alexandrii]}	{NA}	{NA}	{NA}	{NA}	{GO:0008168; methyltransferase activity; molecular_function GO:0008152; NA}	{NA}	{NA}	{NA}	{NA}	{NA}	{false}	{NA}	{PF08241:Methyltransferase domain PF05175:Methyltransferase small domain}
MAR44G.1_GM000371	{Scaffold1:413555:414613:-}	{WP_208981421.1; glycoside hydrolase family 5 protein [Roseibium alexandrii]}	{A0A023VXA2; Endoglucanase }	{labp:FJ695_01060; K01179 E3.2.1.4 endoglucanase 3.2.1.4 Metabolism; Carbohydrate metabolism; Starch and sucrose metabolism [PATH:ko00500] Environmental Information Processing; Signal transduction; Two-component system [PATH:ko02020]}	{WP.013654645.1; COG2730 Aryl-phospho-beta-D-glucosidase BglC, GH1 family G Carbohydrate transport and metabolism ;}	{NA}	{GO:0004553; hydrolase activity, hydrolyzing O-glycosyl compounds; molecular_function GO:0005975; carbohydrate metabolic process; biological_process}	{NA}	{NA}	{NA}	{NA}	{NA}	{false}	{QDG74571.1_; GH5 endo-beta-1,4-glucanase / cellulase (EC 3.2.1.4); endo-beta-1,4-xylanase (EC 3.2.1.8); beta-glucosidase (EC 3.2.1.21); beta-mannosidase (EC 3.2.1.25); beta-glucosylceramidase (EC 3.2.1.45); glucan beta-1,3-glucosidase (EC 3.2.1.58); exo-beta-1,4-glucanase / cellodextrinase (EC 3.2.1.74); glucan endo-1,6-beta-glucosidase (EC 3.2.1.75); mannan endo-beta-1,4-mannosidase (EC 3.2.1.7…	{PF00150:Cellulase (glycosyl hydrolase family 5)}
MAR44G.1_GM000372	{Scaffold1:414758:415513:-}	{WP_208981422.1; cobalt-precorrin-6A reductase [Roseibium alexandrii]}	{Q53139; Precorrin-6A reductase }	{labp:FJ695_01055; K05895 cobK-cbiJ precorrin-6A/cobalt-precorrin-6A reductase [EC:1.3.1.54 1.3.1.106] 1.3.1.54,1.3.1.106 Metabolism; Metabolism of cofactors and vitamins; Porphyrin metabolism [PATH:ko00860]}	{WP.077290536.1; COG2099 Precorrin-6x reductase H Coenzyme transport and metabolism ;}	{NA}	{GO:0016994; precorrin-6A reductase activity; molecular_function GO:0055114; oxidation-reduction process; biological_process GO:0009236; cobalamin biosynthetic process; biological_process}	{NA}	{NA}	{NA}	{NA}	{NA}	{false}	{NA}	{PF02571:Precorrin-6x reductase CbiJ/CobK}
MAR44G.1_GM000373	{Scaffold1:415503:416597:-}	{WP_055672995.1; cobalt-precorrin-5B (C(1))-methyltransferase [Roseibium alexandrii]}	{A6X049; Cobalt-precorrin-5B C(1)-methyltransferase }	{labp:FJ695_01050; K02188 cbiD cobalt-precorrin-5B (C1)-methyltransferase 2.1.1.195 Metabolism; Metabolism of cofactors and vitamins; Porphyrin metabolism [PATH:ko00860]}	{WP.077290535.1; COG1903 Cobalamin biosynthesis protein CbiD (cobalt-precorrin-5B C-methyltransferase) H Coenzyme transport and metabolism ;}	{NA}	{GO:0019058; viral infectious cycle; biological_process GO:0016740; transferase activity; molecular_function GO:0009236; cobalamin biosynthetic process; biological_process}	{NA}	{NA}	{NA}	{NA}	{NA}	{false}	{NA}	{PF02831:gpW PF01888:CbiD}
MAR44G.1_GM000374	{Scaffold1:416718:417584:+}	{WP_055672996.1; uroporphyrinogen-III C-methyltransferase [Roseibium alexandrii]}	{P21631; Uroporphyrinogen-III C-methyltransferase }	{labp:FJ695_01045; K02303 cobA uroporphyrin-III C-methyltransferase 2.1.1.107 Metabolism; Metabolism of cofactors and vitamins; Porphyrin metabolism [PATH:ko00860]}	{WP.077293144.1; COG0007 Uroporphyrinogen-III methylase (siroheme synthase) H Coenzyme transport and metabolism ;}	{NA}	{GO:0008152; NA GO:0008168; methyltransferase activity; molecular_function}	{NA}	{NA}	{NA}	{NA}	{NA}	{false}	{NA}	{PF00590:Tetrapyrrole (Corrin/Porphyrin) Methylases}
MAR44G.1_GM000375	{Scaffold1:417574:418911:+}	{WP_055672997.1; cobyrinate a,c-diamide synthase [Roseibium alexandrii]}	{A6X051; Hydrogenobyrinate a,c-diamide synthase }	{labp:FJ695_01040; K02224 cobB-cbiA cobyrinic acid a,c-diamide synthase [EC:6.3.5.9 6.3.5.11] 6.3.5.9,6.3.5.11 Metabolism; Metabolism of cofactors and vitamins; Porphyrin metabolism [PATH:ko00860]}	{WP.077290534.1; COG1797 Cobyrinic acid a,c-diamide synthase H Coenzyme transport and metabolism ;}	{NA}	{GO:0008152; NA GO:0005524; ATP binding; molecular_function GO:0016491; oxidoreductase activity; molecular_function GO:0009236; cobalamin biosynthetic process; biological_process GO:0055114; oxidation-reduction process; biological_process GO:0016301; kinase activity; molecular_function GO:0003824; NA}	{NA}	{NA}	{NA}	{NA}	{NA}	{false}	{NA}	{PF07685:CobB/CobQ-like glutamine amidotransferase domain PF00142:4Fe-4S iron sulfur cluster binding proteins, NifH/frxC family PF00485:Phosphoribulokinase / Uridine kinase family}
MAR44G.1_GM000376	{Scaffold1:418884:419513:-}	{WP_055672998.1; class I SAM-dependent methyltransferase [Roseibium alexandrii]}	{NA}	{NA}	{WP.077290533.1; COG4976 Predicted methyltransferase, contains TPR repeat R General function prediction only ;}	{NA}	{GO:0008276; protein methyltransferase activity; molecular_function GO:0008152; NA GO:0008168; methyltransferase activity; molecular_function GO:0005737; cytoplasm; cellular_component GO:0008610; lipid biosynthetic process; biological_process GO:0006479; protein methylation; biological_process}	{NA}	{NA}	{NA}	{NA}	{NA}	{false}	{NA}	{PF05175:Methyltransferase small domain PF08241:Methyltransferase domain PF06325:Ribosomal protein L11 methyltransferase (PrmA) PF01209:ubiE/COQ5 methyltransferase family PF02353:Mycolic acid cyclopropane synthetase}
MAR44G.1_GM000377	{Scaffold1:419586:420359:-}	{WP_055672999.1; precorrin-4 C(11)-methyltransferase [Roseibium alexandrii]}	{O68100; Precorrin-4 C(11)-methyltransferase }	{labp:FJ695_01035; K05936 cobM, cbiF precorrin-4/cobalt-precorrin-4 C11-methyltransferase [EC:2.1.1.133 2.1.1.271] 2.1.1.133,2.1.1.271 Metabolism; Metabolism of cofactors and vitamins; Porphyrin metabolism [PATH:ko00860]}	{WP.023001619.1; COG2875 Precorrin-4 methylase H Coenzyme transport and metabolism ;}	{NA}	{GO:0008152; NA GO:0008168; methyltransferase activity; molecular_function GO:0051536; iron-sulfur cluster binding; molecular_function GO:0003824; NA}	{NA}	{NA}	{NA}	{NA}	{NA}	{false}	{NA}	{PF04055:Radical SAM superfamily PF00590:Tetrapyrrole (Corrin/Porphyrin) Methylases}
MAR44G.1_GM000378	{Scaffold1:420356:422200:-}	{WP_055673000.1; precorrin-3B C(17)-methyltransferase [Roseibium alexandrii]}	{O87689; Cobalt-factor III methyltransferase }	{labp:FJ695_01030; K13541 cbiGH-cobJ cobalt-precorrin 5A hydrolase / cobalt-factor III methyltransferase / precorrin-3B C17-methyltransferase [EC:3.7.1.12 2.1.1.272 2.1.1.131] 3.7.1.12,2.1.1.272,2.1.1.131 Metabolism; Metabolism of cofactors and vitamins; Porphyrin metabolism [PATH:ko00860]}	{WP.077290532.1; COG2073 Cobalamin biosynthesis protein CbiG H Coenzyme transport and metabolism ;}	{NA}	{GO:0009236; cobalamin biosynthetic process; biological_process GO:0008168; methyltransferase activity; molecular_function GO:0008152; NA}	{NA}	{NA}	{NA}	{NA}	{NA}	{false}	{NA}	{PF01890:Cobalamin synthesis G C-terminus PF00590:Tetrapyrrole (Corrin/Porphyrin) Methylases}
MAR44G.1_GM000379	{Scaffold1:422170:422895:-}	{EEE43515.2; precorrin-2 C20-methyltransferase [Roseibium alexandrii DFL-11]}	{Q9HZU3; Precorrin-2 C(20)-methyltransferase }	{labp:FJ695_01025; K03394 cobI-cbiL precorrin-2/cobalt-factor-2 C20-methyltransferase [EC:2.1.1.130 2.1.1.151] 2.1.1.130,2.1.1.151 Metabolism; Metabolism of cofactors and vitamins; Porphyrin metabolism [PATH:ko00860]}	{WP.077293143.1; COG2243 Precorrin-2 methylase H Coenzyme transport and metabolism ;}	{NA}	{GO:0008152; NA GO:0008168; methyltransferase activity; molecular_function}	{NA}	{NA}	{NA}	{NA}	{NA}	{false}	{NA}	{PF00590:Tetrapyrrole (Corrin/Porphyrin) Methylases}
MAR44G.1_GM000380	{Scaffold1:422892:424091:-}	{WP_055673001.1; bifunctional cobalt-precorrin-7 (C(5))-methyltransferase/cobalt-precorrin-6B (C(15))-methyltransferase [Roseibium alexandrii]}	{Q9HZU0; Precorrin-6Y C(5,15)-methyltransferase [decarboxylating] }	{labp:FJ695_01020; K00595 cobL-cbiET precorrin-6B C5,15-methyltransferase / cobalt-precorrin-6B C5,C15-methyltransferase [EC:2.1.1.132 2.1.1.289 2.1.1.196] 2.1.1.132,2.1.1.289,2.1.1.196 Metabolism; Metabolism of cofactors and vitamins; Porphyrin metabolism [PATH:ko00860]}	{WP.077290531.1; COG2242 Precorrin-6B methylase 2 H Coenzyme transport and metabolism ;}	{NA}	{GO:0004719; protein-L-isoaspartate (D-aspartate) O-methyltransferase activity; molecular_function GO:0006464; protein modification process; biological_process GO:0008168; methyltransferase activity; molecular_function GO:0016491; oxidoreductase activity; molecular_function GO:0008152; NA GO:0055114; oxidation-reduction process; biological_process GO:0008270; zinc ion binding; molecular_function}	{NA}	{NA}	{NA}	{NA}	{NA}	{false}	{NA}	{PF00590:Tetrapyrrole (Corrin/Porphyrin) Methylases PF01135:Protein-L-isoaspartate(D-aspartate) O-methyltransferase (PCMT) PF00107:Zinc-binding dehydrogenase}
MAR44G.1_GM000381	{Scaffold1:424088:424318:-}	{WP_055673002.1; hypothetical protein [Roseibium alexandrii]}	{NA}	{NA}	{NA}	{NA}	{NA}	{NA}	{NA}	{NA}	{NA}	{NA}	{false}	{NA}	{NA}
MAR44G.1_GM000382	{Scaffold1:424320:424985:-}	{WP_055673003.1; precorrin-8X methylmutase [Roseibium alexandrii]}	{P21638; Precorrin-8X methylmutase }	{labp:FJ695_01010; K06042 cobH-cbiC precorrin-8X/cobalt-precorrin-8 methylmutase [EC:5.4.99.61 5.4.99.60] 5.4.99.61,5.4.99.60 Metabolism; Metabolism of cofactors and vitamins; Porphyrin metabolism [PATH:ko00860]}	{WP.077293142.1; COG2082 Precorrin-8X methylmutase CbiC/CobH H Coenzyme transport and metabolism ;}	{NA}	{GO:0009236; cobalamin biosynthetic process; biological_process GO:0016993; precorrin-8X methylmutase activity; molecular_function}	{NA}	{NA}	{NA}	{NA}	{NA}	{false}	{NA}	{PF02570:Precorrin-8X methylmutase}
MAR44G.1_GM000383	{Scaffold1:425076:425321:-}	{WP_055673004.1; hypothetical protein [Roseibium alexandrii]}	{NA}	{NA}	{NA}	{NA}	{GO:0003677; DNA binding; molecular_function GO:0005634; nucleus; cellular_component GO:0006355; regulation of transcription, DNA-dependent; biological_process GO:0005496; steroid binding; molecular_function GO:0004882; androgen receptor activity; molecular_function GO:0030521; androgen receptor signaling pathway; biological_process}	{NA}	{NA}	{NA}	{NA}	{NA}	{false}	{NA}	{PF02166:Androgen receptor}
MAR44G.1_GM000384	{Scaffold1:425796:427358:-}	{CTQ73804.1; Phosphoserine phosphatase RsbU [Roseibium alexandrii]}	{NA}	{NA}	{WP.077290526.1; COG2208 Phosphoserine phosphatase RsbU, regulator of sigma subunit TK Signal transduction mechanisms ; Transcription ;}	{NA}	{GO:0003824; NA}	{NA}	{NA}	{NA}	{NA}	{NA}	{false}	{NA}	{PF07228:Stage II sporulation protein E (SpoIIE)}
MAR44G.1_GM000385	{Scaffold1:427607:428125:+}	{WP_055673006.1; amino acid-binding protein [Roseibium alexandrii]}	{NA}	{NA}	{WP.023001607.1; COG2716 Glycine cleavage system regulator GcvR E Amino acid transport and metabolism ;}	{NA}	{GO:0008152; NA GO:0016597; amino acid binding; molecular_function}	{NA}	{NA}	{NA}	{NA}	{NA}	{false}	{NA}	{PF01842:ACT domain}
MAR44G.1_GM000386	{Scaffold1:428231:428632:+}	{CTQ73810.1; hypothetical protein LAX5112_03665 [Roseibium alexandrii]}	{NA}	{NA}	{NA}	{NA}	{NA}	{NA}	{NA}	{NA}	{NA}	{NA}	{false}	{NA}	{NA}
MAR44G.1_GM000387	{Scaffold1:428720:430126:+}	{WP_055673008.1; PepSY domain-containing protein [Roseibium alexandrii]}	{NA}	{NA}	{WP.058898128.1; COG3182 PepSY-associated TM region S Function unknown ;}	{NA}	{NA}	{NA}	{NA}	{NA}	{NA}	{NA}	{false}	{NA}	{NA}
MAR44G.1_GM000388	{Scaffold1:430179:431582:-}	{WP_008192285.1; Hsp70 family protein [Roseibium alexandrii]}	{NA}	{labp:FJ695_00990; K04046 yegD hypothetical chaperone protein -- --}	{WP.077290525.1; COG0443 Molecular chaperone DnaK (HSP70) O Posttranslational modification, protein turnover, chaperones ;}	{NA}	{GO:0005975; carbohydrate metabolic process; biological_process GO:0016773; phosphotransferase activity, alcohol group as acceptor; molecular_function GO:0000902; cell morphogenesis; biological_process}	{NA}	{NA}	{NA}	{NA}	{NA}	{false}	{NA}	{PF02782:FGGY family of carbohydrate kinases, C-terminal domain PF06723:MreB/Mbl protein}
MAR44G.1_GM000389	{Scaffold1:431988:434408:+}	{WP_055673009.1; hypothetical protein [Roseibium alexandrii]}	{NA}	{NA}	{NA}	{NA}	{NA}	{NA}	{NA}	{NA}	{NA}	{NA}	{false}	{NA}	{NA}
MAR44G.1_GM000390	{Scaffold1:434643:434783:+}	{NA}	{NA}	{NA}	{NA}	{NA}	{NA}	{NA}	{NA}	{NA}	{NA}	{NA}	{false}	{NA}	{NA}
MAR44G.1_GM000391	{Scaffold1:435183:435476:+}	{WP_235812917.1; hypothetical protein [Roseibium alexandrii]}	{NA}	{NA}	{NA}	{NA}	{NA}	{NA}	{NA}	{NA}	{NA}	{NA}	{false}	{NA}	{NA}
MAR44G.1_GM000392	{Scaffold1:435637:436287:+}	{WP_235812918.1; peptide-methionine (S)-S-oxide reductase MsrA [Roseibium alexandrii]}	{Q9A9I6; Peptide methionine sulfoxide reductase MsrA 1 }	{labp:FJ695_00960; K07304 msrA peptide-methionine (S)-S-oxide reductase 1.8.4.11 --}	{WP.077293190.1; COG0225 Peptide methionine sulfoxide reductase MsrA O Posttranslational modification, protein turnover, chaperones ;}	{NA}	{GO:0008113; peptide-methionine-(S)-S-oxide reductase activity; molecular_function GO:0055114; oxidation-reduction process; biological_process}	{NA}	{NA}	{NA}	{NA}	{NA}	{false}	{NA}	{PF01625:Peptide methionine sulfoxide reductase}
MAR44G.1_GM000393	{Scaffold1:436501:436821:+}	{WP_134853041.1; hypothetical protein [Roseibium alexandrii]}	{NA}	{NA}	{NA}	{NA}	{NA}	{NA}	{NA}	{NA}	{NA}	{NA}	{false}	{NA}	{NA}
MAR44G.1_GM000394	{Scaffold1:436821:438311:+}	{WP_134853040.1; methyl-accepting chemotaxis protein [Roseibium alexandrii]}	{NA}	{labp:FJ695_00950; K03406 mcp methyl-accepting chemotaxis protein -- Environmental Information Processing; Signal transduction; Two-component system [PATH:ko02020] Cellular Processes; Cell motility; Bacterial chemotaxis [PATH:ko02030]}	{WP.062490604.1; COG0840 Methyl-accepting chemotaxis protein (MCP) T Signal transduction mechanisms ;}	{NA}	{GO:0007165; signal transduction; biological_process GO:0000444; MIS12/MIND type complex; cellular_component GO:0007155; cell adhesion; biological_process GO:0030168; platelet activation; biological_process GO:0005604; basement membrane; cellular_component GO:0019089; transmission of virus; biological_process GO:0030334; regulation of cell migration; biological_process GO:0000775; chromosome, cen…	{NA}	{NA}	{NA}	{NA}	{NA}	{false}	{NA}	{PF06248:Centromere/kinetochore Zw10 PF06009:Laminin Domain II PF00957:Synaptobrevin PF08702:Fibrinogen alpha/beta chain family PF00804:Syntaxin PF08202:Mis12-Mtw1 protein family PF03233:Aphid transmission protein PF00015:Methyl-accepting chemotaxis protein (MCP) signalling domain PF06008:Laminin Domain I}
MAR44G.1_GM000395	{Scaffold1:438540:440399:+}	{EEE43543.2; aminodeoxychorismate synthase, component I, bacterial clade [Roseibium alexandrii DFL-11]}	{NA}	{labp:FJ695_00945; K03342 pabBC para-aminobenzoate synthetase / 4-amino-4-deoxychorismate lyase [EC:2.6.1.85 4.1.3.38] 2.6.1.85,4.1.3.38 Metabolism; Metabolism of cofactors and vitamins; Folate biosynthesis [PATH:ko00790]}	{WP.077290903.1; COG0147 Anthranilate/para-aminobenzoate synthases component I EH Amino acid transport and metabolism ; Coenzyme transport and metabolism ;}	{NA}	{GO:0003824; NA GO:0008152; NA}	{NA}	{NA}	{NA}	{NA}	{NA}	{false}	{NA}	{PF01063:Amino-transferase class IV}
MAR44G.1_GM000396	{Scaffold1:440408:441064:-}	{WP_008191378.1; nucleotidyltransferase family protein [Roseibium alexandrii]}	{NA}	{labp:FJ695_00940; K09962 K09962 uncharacterized protein -- --}	{WP.077290902.1; COG3575 Uncharacterized conserved protein S Function unknown ;}	{NA}	{GO:0006508; proteolysis; biological_process GO:0008236; serine-type peptidase activity; molecular_function}	{NA}	{NA}	{NA}	{NA}	{NA}	{false}	{NA}	{PF03575:Peptidase family S51}
MAR44G.1_GM000397	{Scaffold1:441212:441598:+}	{WP_144432030.1; hypothetical protein [Roseibium alexandrii]}	{NA}	{NA}	{NA}	{NA}	{NA}	{NA}	{NA}	{NA}	{NA}	{NA}	{false}	{NA}	{NA}
MAR44G.1_GM000398	{Scaffold1:441659:444076:-}	{WP_055670525.1; phenylalanine--tRNA ligase subunit beta [Roseibium alexandrii]}	{Q8FXX4; Phenylalanine--tRNA ligase beta subunit }	{labp:FJ695_00930; K01890 FARSB, pheT phenylalanyl-tRNA synthetase beta chain 6.1.1.20 Genetic Information Processing; Translation; Aminoacyl-tRNA biosynthesis [PATH:ko00970]}	{WP.022999680.1; COG0073 tRNA-binding EMAP/Myf domain J Translation, ribosomal structure and biogenesis ;}	{NA}	{GO:0003723; RNA binding; molecular_function GO:0000287; magnesium ion binding; molecular_function GO:0004826; phenylalanine-tRNA ligase activity; molecular_function GO:0000049; tRNA binding; molecular_function GO:0006432; phenylalanyl-tRNA aminoacylation; biological_process GO:0008033; tRNA processing; biological_process GO:0005524; ATP binding; molecular_function}	{NA}	{NA}	{NA}	{NA}	{NA}	{false}	{NA}	{PF03147:Ferredoxin-fold anticodon binding domain PF01588:Putative tRNA binding domain PF03483:B3/4 domain PF03484:tRNA synthetase B5 domain}
MAR44G.1_GM000399	{Scaffold1:444133:444798:-}	{WP_008189410.1; hypothetical protein [Roseibium alexandrii]}	{NA}	{NA}	{NA}	{NA}	{NA}	{NA}	{NA}	{NA}	{NA}	{NA}	{false}	{NA}	{NA}
MAR44G.1_GM000400	{Scaffold1:444826:445908:-}	{WP_008189980.1; phenylalanine--tRNA ligase subunit alpha [Roseibium alexandrii]}	{B6JCK5; Phenylalanine--tRNA ligase alpha subunit }	{labp:FJ695_00920; K01889 FARSA, pheS phenylalanyl-tRNA synthetase alpha chain 6.1.1.20 Genetic Information Processing; Translation; Aminoacyl-tRNA biosynthesis [PATH:ko00970]}	{WP.077290901.1; COG0016 Phenylalanyl-tRNA synthetase alpha subunit J Translation, ribosomal structure and biogenesis ;}	{NA}	{GO:0006432; phenylalanyl-tRNA aminoacylation; biological_process GO:0000166; nucleotide binding; molecular_function GO:0004812; aminoacyl-tRNA ligase activity; molecular_function GO:0005737; cytoplasm; cellular_component GO:0004826; phenylalanine-tRNA ligase activity; molecular_function GO:0043039; tRNA aminoacylation; biological_process GO:0000049; tRNA binding; molecular_function GO:0005524; A…	{NA}	{NA}	{NA}	{NA}	{NA}	{false}	{NA}	{PF01409:tRNA synthetases class II core domain (F) PF02912:Aminoacyl tRNA synthetase class II, N-terminal domain}
MAR44G.1_GM000401	{Scaffold1:446237:447172:-}	{WP_055670524.1; LysR substrate-binding domain-containing protein [Roseibium alexandrii]}	{NA}	{labp:FJ695_00915; K03566 gcvA LysR family transcriptional regulator, glycine cleavage system transcriptional activator -- Cellular Processes; Cellular community - prokaryotes; Biofilm formation - Escherichia coli [PATH:ko02026]}	{WP.077290900.1; COG0583 DNA-binding transcriptional regulator, LysR family K Transcription ;}	{NA}	{GO:0006355; regulation of transcription, DNA-dependent; biological_process GO:0003700; sequence-specific DNA binding transcription factor activity; molecular_function}	{NA}	{NA}	{NA}	{NA}	{NA}	{false}	{NA}	{PF00126:Bacterial regulatory helix-turn-helix protein, lysR family}
MAR44G.1_GM000402	{Scaffold1:447307:447444:+}	{WP_167578991.1; hypothetical protein [Roseibium alexandrii]}	{NA}	{NA}	{NA}	{NA}	{NA}	{NA}	{NA}	{NA}	{NA}	{NA}	{false}	{NA}	{NA}
MAR44G.1_GM000403	{Scaffold1:447595:449409:-}	{EEE47899.1; GTP-binding protein LepA [Roseibium alexandrii DFL-11]}	{Q11AY3; Elongation factor 4 }	{labp:FJ695_00910; K03596 lepA GTP-binding protein LepA -- Human Diseases; Infectious disease: bacterial; Legionellosis [PATH:ko05134]}	{WP.022999689.1; COG0481 Translation elongation factor EF-4, membrane-bound GTPase J Translation, ribosomal structure and biogenesis ;}	{NA}	{GO:0007049; cell cycle; biological_process GO:0007264; small GTPase mediated signal transduction; biological_process GO:0005525; GTP binding; molecular_function GO:0003924; GTPase activity; molecular_function GO:0005622; intracellular; cellular_component}	{NA}	{NA}	{NA}	{NA}	{NA}	{false}	{CAE6204650.1_; GH28 polygalacturonase (EC 3.2.1.15); exo-polygalacturonase (EC 3.2.1.67); exo-polygalacturonosidase (EC 3.2.1.82); rhamnogalacturonase (EC 3.2.1.171); rhamnogalacturonan alpha-1,2-galacturonohydrolase (EC 3.2.1.173); xylogalacturonan hydrolase (EC 3.2.1.-) }	{PF00735:Septin PF03144:Elongation factor Tu domain 2 PF00071:Ras family PF01926:50S ribosome-binding GTPase PF08477:Ras of Complex, Roc, domain of DAPkinase PF00009:Elongation factor Tu GTP binding domain}
MAR44G.1_GM000404	{Scaffold1:449612:450160:+}	{WP_040451405.1; GNAT family N-acetyltransferase [Roseibium alexandrii]}	{Q9HUU7; L-methionine sulfoximine/L-methionine sulfone acetyltransferase }	{labp:FJ695_00905; K24217 mnaT L-amino acid N-acyltransferase 2.3.1.- --}	{WP.062491965.1; COG1247 L-amino acid N-acyltransferase MnaT E Amino acid transport and metabolism ;}	{NA}	{GO:0008080; N-acetyltransferase activity; molecular_function GO:0016747; transferase activity, transferring acyl groups other than amino-acyl groups; molecular_function}	{NA}	{NA}	{NA}	{NA}	{NA}	{false}	{NA}	{PF13673:Acetyltransferase (GNAT) domain PF13302:Acetyltransferase (GNAT) domain PF08445:FR47-like protein PF13508:Acetyltransferase (GNAT) domain PF00583:Acetyltransferase (GNAT) family}
MAR44G.1_GM000405	{Scaffold1:450181:451275:-}	{WP_055670523.1; penicillin-insensitive murein endopeptidase [Roseibium alexandrii]}	{P44566; Penicillin-insensitive murein endopeptidase }	{labr:CHH27_23945; K07261 mepA penicillin-insensitive murein DD-endopeptidase 3.4.24.- --}	{WP.062490585.1; COG3770 Murein endopeptidase MepA (D-alanyl-D-alanine-endopeptidase) M Cell wall/membrane/envelope biogenesis ;}	{NA}	{GO:0006508; proteolysis; biological_process GO:0030288; outer membrane-bounded periplasmic space; cellular_component GO:0004252; serine-type endopeptidase activity; molecular_function}	{NA}	{NA}	{NA}	{NA}	{NA}	{false}	{NA}	{PF03411:Penicillin-insensitive murein endopeptidase}
MAR44G.1_GM000406	{Scaffold1:451335:452420:-}	{WP_055670522.1; patatin-like phospholipase family protein [Roseibium alexandrii]}	{NA}	{NA}	{WP.022999692.1; COG3621 Patatin-like phospholipase/acyl hydrolase, includes sporulation protein CotR R General function prediction only ;}	{NA}	{GO:0006629; lipid metabolic process; biological_process}	{NA}	{NA}	{NA}	{NA}	{NA}	{false}	{NA}	{PF01734:Patatin-like phospholipase}
MAR44G.1_GM000407	{Scaffold1:452706:453749:+}	{WP_055670521.1; M20/M25/M40 family metallo-hydrolase [Roseibium alexandrii]}	{NA}	{labp:FJ695_00890; K20608 tet tetrahedral aminopeptidase 3.4.11.- --}	{WP.062490583.1; COG1363 Putative aminopeptidase FrvX EG Amino acid transport and metabolism ; Carbohydrate transport and metabolism ;}	{NA}	{GO:0008270; zinc ion binding; molecular_function GO:0016787; hydrolase activity; molecular_function GO:0008233; peptidase activity; molecular_function GO:0008152; NA GO:0006508; proteolysis; biological_process GO:0004177; aminopeptidase activity; molecular_function}	{NA}	{NA}	{NA}	{NA}	{NA}	{false}	{NA}	{PF04389:Peptidase family M28 PF01546:Peptidase family M20/M25/M40 PF02127:Aminopeptidase I zinc metalloprotease (M18)}
MAR44G.1_GM000408	{Scaffold1:453810:454400:-}	{WP_055670520.1; hypothetical protein [Roseibium alexandrii]}	{NA}	{NA}	{NA}	{NA}	{NA}	{NA}	{NA}	{NA}	{NA}	{NA}	{true}	{NA}	{NA}
MAR44G.1_GM000409	{Scaffold1:454505:455173:-}	{WP_055670519.1; prolyl oligopeptidase family serine peptidase [Roseibium alexandrii]}	{NA}	{labp:FJ695_00880; K06999 K06999 phospholipase/carboxylesterase -- --}	{WP.062490581.1; COG0400 Predicted esterase R General function prediction only ;}	{NA}	{GO:0016787; hydrolase activity; molecular_function GO:0006508; proteolysis; biological_process GO:0008152; NA GO:0008236; serine-type peptidase activity; molecular_function}	{NA}	{NA}	{NA}	{NA}	{NA}	{true}	{NA}	{PF00326:Prolyl oligopeptidase family PF01738:Dienelactone hydrolase family PF07859:alpha/beta hydrolase fold PF02230:Phospholipase/Carboxylesterase}
MAR44G.1_GM000410	{Scaffold1:455170:456387:-}	{WP_082428879.1; TCR/Tet family MFS transporter [Roseibium alexandrii]}	{NA}	{labp:FJ695_00875; K08151 tetA MFS transporter, DHA1 family, tetracycline resistance protein -- --}	{WP.077290897.1; COG2814 Predicted arabinose efflux permease AraJ, MFS family G Carbohydrate transport and metabolism ;}	{NA}	{GO:0016021; integral to membrane; cellular_component GO:0016020; membrane; cellular_component GO:0055085; transmembrane transport; biological_process GO:0005215; NA GO:0022857; transmembrane transporter activity; molecular_function GO:0006810; transport; biological_process}	{NA}	{NA}	{NA}	{ARO:3000183, ARO:3000476, ARO:3000566, ARO:3000165, ARO:3000569, ARO:3000177, ARO:3000173, ARO:3000478, ARO:3000561, ARO:3000174, ARO:3000572, ARO:3000175, ARO:3000182, ARO:3000166, ARO:3000167; tet(Z), tet(31), tet(39), tet(A), tet(41), tet(J), tet(E), tet(33), tet(30), tet(G), tet(42), tet(H), tet(Y), tet(B), tet(C) 211.846, 182.57, 245.358, 193.741, 253.447, 198.749, 186.808, 194.126, 226.098…	{NA}	{false}	{NA}	{PF03137:Organic Anion Transporter Polypeptide (OATP) family PF07690:Major Facilitator Superfamily PF00083:Sugar (and other) transporter}
MAR44G.1_GM000411	{Scaffold1:456380:456532:+}	{NA}	{NA}	{NA}	{NA}	{NA}	{NA}	{NA}	{NA}	{NA}	{NA}	{NA}	{false}	{NA}	{NA}
MAR44G.1_GM000412	{Scaffold1:456567:456767:-}	{WP_055670518.1; cold shock domain-containing protein [Roseibium alexandrii]}	{P62169; Cold shock-like protein CspC }	{labp:FJ695_00870; K03704 cspA cold shock protein -- --}	{WP.031268890.1; COG1278 Cold shock protein, CspA family K Transcription ;}	{NA}	{GO:0006355; regulation of transcription, DNA-dependent; biological_process GO:0003677; DNA binding; molecular_function}	{PHI:7637; P0A355 CspA 1639 Listeria monocytogenes listeriosis Homo sapiens (related: human) Cold shock protein Gene mutation reduced virulence}	{NA}	{NA}	{NA}	{NA}	{false}	{NA}	{PF00313:'Cold-shock' DNA-binding domain}
MAR44G.1_GM000413	{Scaffold1:457211:457747:-}	{CTQ65328.1; YtoQ family protein [Roseibium alexandrii]}	{O34305; Uncharacterized protein YtoQ }	{NA}	{NP.390863.1; COG3613 Nucleoside 2-deoxyribosyltransferase F Nucleotide transport and metabolism ;}	{NA}	{GO:0009159; deoxyribonucleoside monophosphate catabolic process; biological_process GO:0016021; integral to membrane; cellular_component GO:0050144; nucleoside deoxyribosyltransferase activity; molecular_function GO:0006812; cation transport; biological_process GO:0016887; ATPase activity; molecular_function GO:0070694; deoxyribonucleoside 5'-monophosphate N-glycosidase activity; molecular_funct…	{NA}	{NA}	{NA}	{NA}	{NA}	{false}	{NA}	{PF05014:Nucleoside 2-deoxyribosyltransferase PF12409:P5-type ATPase cation transporter}
MAR44G.1_GM000414	{Scaffold1:457744:458604:-}	{WP_055670517.1; SDR family oxidoreductase [Roseibium alexandrii]}	{NA}	{NA}	{WP.055657427.1; COG0451 Nucleoside-diphosphate-sugar epimerase M Cell wall/membrane/envelope biogenesis ;}	{NA}	{GO:0050662; coenzyme binding; molecular_function GO:0044237; cellular metabolic process; biological_process GO:0003824; NA}	{NA}	{NA}	{NA}	{NA}	{NA}	{false}	{NA}	{PF01370:NAD dependent epimerase/dehydratase family}
MAR44G.1_GM000415	{Scaffold1:458604:459446:-}	{WP_055670516.1; RNA methyltransferase [Roseibium alexandrii]}	{NA}	{labp:FJ695_00855; K03437 spoU RNA methyltransferase, TrmH family -- --}	{WP.022999705.1; COG0566 tRNA G18 (ribose-2'-O)-methylase SpoU J Translation, ribosomal structure and biogenesis ;}	{NA}	{GO:0008173; RNA methyltransferase activity; molecular_function GO:0006396; RNA processing; biological_process GO:0003723; RNA binding; molecular_function GO:0008168; methyltransferase activity; molecular_function GO:0008649; rRNA methyltransferase activity; molecular_function GO:0046677; response to antibiotic; biological_process}	{NA}	{NA}	{NA}	{NA}	{NA}	{false}	{NA}	{PF08032:RNA 2'-O ribose methyltransferase substrate binding PF00588:SpoU rRNA Methylase family PF04705:Thiostrepton-resistance methylase, N terminus}
MAR44G.1_GM000416	{Scaffold1:459540:460154:-}	{WP_008190721.1; TetR/AcrR family transcriptional regulator [Roseibium alexandrii]}	{NA}	{NA}	{WP.012176934.1; COG1309 DNA-binding protein, AcrR family, includes nucleoid occlusion protein SlmA K Transcription ;}	{NA}	{GO:0045892; negative regulation of transcription, DNA-dependent; biological_process GO:0003677; DNA binding; molecular_function}	{NA}	{NA}	{NA}	{NA}	{NA}	{false}	{NA}	{PF00440:Bacterial regulatory proteins, tetR family PF04316:Anti-sigma-28 factor, FlgM}
MAR44G.1_GM000417	{Scaffold1:460384:461517:+}	{WP_055670514.1; efflux RND transporter periplasmic adaptor subunit [Roseibium alexandrii]}	{NA}	{NA}	{WP.011454434.1; COG0845 Multidrug efflux pump subunit AcrA (membrane-fusion protein) MV Cell wall/membrane/envelope biogenesis ; Defense mechanisms ;}	{NA}	{NA}	{NA}	{NA}	{NA}	{NA}	{NA}	{false}	{NA}	{NA}
MAR44G.1_GM000418	{Scaffold1:461521:464676:+}	{WP_055670513.1; efflux RND transporter permease subunit [Roseibium alexandrii]}	{NA}	{NA}	{WP.076630264.1; COG0841 Multidrug efflux pump subunit AcrB V Defense mechanisms ;}	{NA}	{GO:0005215; NA GO:0016020; membrane; cellular_component GO:0006810; transport; biological_process}	{NA}	{NA}	{NA}	{ARO:3000796, ARO:3002983, ARO:3000804, ARO:3003056, ARO:3003923, ARO:3000216, ARO:3000811, ARO:3000781, ARO:3000801, ARO:3003033, ARO:3000794, ARO:3000784, ARO:3000502, ARO:3003052, ARO:3003699, ARO:3003693, ARO:3000491, ARO:3000790, ARO:3003681, ARO:3003010, ARO:3004144, ARO:3000378, ARO:3000775; mdtF, amrB, MexF, smeE, oqxB, acrB, mtrD, adeJ, MexD, MexY, mdtC, cmeB, AcrF, smeB, mexQ, MexK, acr…	{NA}	{false}	{NA}	{PF03176:MMPL family PF00873:AcrB/AcrD/AcrF family}
MAR44G.1_GM000419	{Scaffold1:464680:465633:-}	{WP_055670512.1; class I SAM-dependent methyltransferase [Roseibium alexandrii]}	{NA}	{labp:FJ695_00835; K06969 rlmI 23S rRNA (cytosine1962-C5)-methyltransferase 2.1.1.191 --}	{WP.077290895.1; COG1092 23S rRNA G2069 N7-methylase RlmK or C1962 C5-methylase RlmI J Translation, ribosomal structure and biogenesis ;}	{NA}	{GO:0004809; tRNA (guanine-N2-)-methyltransferase activity; molecular_function GO:0008152; NA GO:0031167; rRNA methylation; biological_process GO:0008033; tRNA processing; biological_process GO:0008168; methyltransferase activity; molecular_function GO:0003723; RNA binding; molecular_function}	{NA}	{NA}	{NA}	{ARO:3003982; LlmA 23S ribosomal RNA methyltransferase 204.912 antibiotic target modifying enzyme }	{NA}	{false}	{NA}	{PF02005:N2,N2-dimethylguanosine tRNA methyltransferase PF10672:S-adenosylmethionine-dependent methyltransferase PF08241:Methyltransferase domain PF03602:Conserved hypothetical protein 95 PF05175:Methyltransferase small domain}
MAR44G.1_GM000420	{Scaffold1:465778:468258:-}	{EEE45548.1; Methyl-accepting chemotaxis protein [Roseibium alexandrii DFL-11]}	{NA}	{NA}	{WP.077293187.1; COG0840 Methyl-accepting chemotaxis protein (MCP) T Signal transduction mechanisms ;}	{NA}	{GO:0016021; integral to membrane; cellular_component GO:0007155; cell adhesion; biological_process GO:0016020; membrane; cellular_component GO:0005604; basement membrane; cellular_component GO:0007165; signal transduction; biological_process GO:0004871; signal transducer activity; molecular_function}	{NA}	{NA}	{NA}	{NA}	{NA}	{false}	{NA}	{PF06009:Laminin Domain II PF00672:HAMP domain PF00015:Methyl-accepting chemotaxis protein (MCP) signalling domain}
MAR44G.1_GM000421	{Scaffold1:468393:469151:-}	{WP_040451410.1; SDR family oxidoreductase [Roseibium alexandrii]}	{P05406; Protein FixR }	{NA}	{WP.077290894.1; COG1028 NAD(P)-dependent dehydrogenase, short-chain alcohol dehydrogenase family I Lipid transport and metabolism ;}	{NA}	{GO:0003824; NA GO:0044237; cellular metabolic process; biological_process GO:0045226; extracellular polysaccharide biosynthetic process; biological_process GO:0008831; dTDP-4-dehydrorhamnose reductase activity; molecular_function GO:0050662; coenzyme binding; molecular_function GO:0016491; oxidoreductase activity; molecular_function GO:0008152; NA}	{NA}	{NA}	{NA}	{NA}	{NA}	{false}	{NA}	{PF00106:short chain dehydrogenase PF01370:NAD dependent epimerase/dehydratase family PF04321:RmlD substrate binding domain}
MAR44G.1_GM000422	{Scaffold1:469535:470020:+}	{WP_055670508.1; bacterioferritin [Roseibium alexandrii]}	{Q8FW95; Bacterioferritin }	{labp:FJ695_00815; K03594 bfr bacterioferritin 1.16.3.1 Metabolism; Metabolism of cofactors and vitamins; Porphyrin metabolism [PATH:ko00860]}	{WP.022999710.1; COG2193 Bacterioferritin (cytochrome b1) P Inorganic ion transport and metabolism ;}	{NA}	{GO:0006744; ubiquinone biosynthetic process; biological_process GO:0046872; metal ion binding; molecular_function GO:0008199; ferric iron binding; molecular_function GO:0006879; cellular iron ion homeostasis; biological_process GO:0016491; oxidoreductase activity; molecular_function GO:0055114; oxidation-reduction process; biological_process}	{PHI:10827; Q7CWA3 bfr (atu2771) 358 Agrobacterium tumefaciens crown gall Solanum tuberosum (related: potato) Bacterioferritin Gene deletion: full; gene complementation reduced virulence}	{NA}	{NA}	{NA}	{NA}	{false}	{NA}	{PF03232:Ubiquinone biosynthesis protein COQ7 PF00210:Ferritin-like domain PF02915:Rubrerythrin}
MAR44G.1_GM000423	{Scaffold1:470034:470711:-}	{WP_235812857.1; ATP-binding cassette domain-containing protein [Roseibium alexandrii]}	{P76909; Uncharacterized ABC transporter ATP-binding protein YnjD }	{labp:FJ695_00810; K05779 ynjD putative thiamine transport system ATP-binding protein -- --}	{WP.077290893.1; COG4136 ABC-type uncharacterized transport system YnjBCD, ATPase component R General function prediction only ;}	{gnl|TC-DB|B7L6N0; 3.A.1.19.4 Putative sulfate/thiosulfate transporter subunit: ATP-binding component of ABC superfamily transporter OS=Escherichia coli (strain 55989 / EAEC) GN=ynjD PE=3 SV=1}	{GO:0005524; ATP binding; molecular_function GO:0015995; chlorophyll biosynthetic process; biological_process GO:0005525; GTP binding; molecular_function GO:0016851; magnesium chelatase activity; molecular_function GO:0015979; photosynthesis; biological_process GO:0016887; ATPase activity; molecular_function GO:0003924; GTPase activity; molecular_function}	{NA}	{NA}	{NA}	{NA}	{NA}	{false}	{NA}	{PF00005:ABC transporter PF01078:Magnesium chelatase, subunit ChlI PF03193:Protein of unknown function, DUF258}
MAR44G.1_GM000424	{Scaffold1:470716:472416:-}	{WP_055670506.1; ABC transporter permease subunit [Roseibium alexandrii]}	{NA}	{labp:FJ695_00805; K05778 ynjC putative thiamine transport system permease protein -- --}	{WP.077290892.1; COG4135 ABC-type uncharacterized transport system YnjBCD, permease component R General function prediction only ;}	{NA}	{GO:0006810; transport; biological_process GO:0005215; NA GO:0016020; membrane; cellular_component}	{NA}	{NA}	{NA}	{NA}	{NA}	{false}	{NA}	{PF00528:Binding-protein-dependent transport system inner membrane component}
MAR44G.1_GM000425	{Scaffold1:472421:473653:-}	{WP_055670505.1; ABC transporter substrate-binding protein [Roseibium alexandrii]}	{P76223; Protein YnjB }	{labp:FJ695_00800; K05777 ynjB putative thiamine transport system substrate-binding protein -- --}	{WP.077290891.1; COG4134 ABC-type uncharacterized transport system YnjBCD, periplasmic component R General function prediction only ;}	{gnl|TC-DB|B7L6M8; 3.A.1.19.4 Uncharacterized protein OS=Escherichia coli (strain 55989 / EAEC) GN=ynjB PE=4 SV=1}	{GO:0006810; transport; biological_process GO:0030288; outer membrane-bounded periplasmic space; cellular_component GO:0005215; NA}	{NA}	{NA}	{NA}	{NA}	{YES}	{false}	{NA}	{PF03401:Tripartite tricarboxylate transporter family receptor PF01547:Bacterial extracellular solute-binding protein}
MAR44G.1_GM000426	{Scaffold1:473739:474194:-}	{WP_055670504.1; Lrp/AsnC ligand binding domain-containing protein [Roseibium alexandrii]}	{P0ACJ2; Leucine-responsive regulatory protein }	{labp:FJ695_00795; K03719 lrp Lrp/AsnC family transcriptional regulator, leucine-responsive regulatory protein -- --}	{WP.022999714.1; COG1522 DNA-binding transcriptional regulator, Lrp family K Transcription ;}	{NA}	{GO:0003700; sequence-specific DNA binding transcription factor activity; molecular_function GO:0003677; DNA binding; molecular_function GO:0005622; intracellular; cellular_component GO:0043565; sequence-specific DNA binding; molecular_function GO:0006355; regulation of transcription, DNA-dependent; biological_process}	{PHI:9339; D4I076 lrp 552 Erwinia amylovora fire blight Malus domestica (related: apple) Leucine-responsive regulatory protein Gene mutation; gene complementation reduced virulence}	{NA}	{NA}	{NA}	{NA}	{false}	{NA}	{PF01022:Bacterial regulatory protein, arsR family PF13463:Winged helix DNA-binding domain PF09339:IclR helix-turn-helix domain PF13404:AsnC-type helix-turn-helix domain PF01047:MarR family PF01325:Iron dependent repressor, N-terminal DNA binding domain}
MAR44G.1_GM000427	{Scaffold1:474294:477476:+}	{WP_055670562.1; bifunctional proline dehydrogenase/L-glutamate gamma-semialdehyde dehydrogenase PutA [Roseibium alexandrii]}	{O52485; Bifunctional protein PutA }	{labp:FJ695_00790; K13821 putA RHH-type transcriptional regulator, proline utilization regulon repressor / proline dehydrogenase / delta 1-pyrroline-5-carboxylate dehydrogenase [EC:1.5.5.2 1.2.1.88] 1.5.5.2,1.2.1.88 Metabolism; Amino acid metabolism; Alanine, aspartate and glutamate metabolism [PATH:ko00250] Metabolism; Amino acid metabolism; Arginine and proline metabolism [PATH:ko00330]}	{WP.077290890.1; COG4230 Delta 1-pyrroline-5-carboxylate dehydrogenase E Amino acid transport and metabolism ;}	{NA}	{GO:0003842; 1-pyrroline-5-carboxylate dehydrogenase activity; molecular_function GO:0006562; proline catabolic process; biological_process GO:0055114; oxidation-reduction process; biological_process GO:0016491; oxidoreductase activity; molecular_function GO:0006537; glutamate biosynthetic process; biological_process GO:0008152; NA GO:0004657; proline dehydrogenase activity; molecular_function}	{PHI:7999; Q9I5F6 putA 287 Pseudomonas aeruginosa pneumonia Mus musculus (related: house mouse) Bifunctional enzyme which converts proline to glutamate Gene deletion: full; gene complementation reduced virulence}	{NA}	{NA}	{NA}	{NA}	{false}	{NA}	{PF01619:Proline dehydrogenase PF00171:Aldehyde dehydrogenase family PF14850:DNA-binding domain of Proline dehydrogenase}
MAR44G.1_GM000428	{Scaffold1:477473:478255:-}	{WP_055670503.1; hypothetical protein [Roseibium alexandrii]}	{NA}	{NA}	{NA}	{NA}	{NA}	{NA}	{NA}	{NA}	{NA}	{NA}	{false}	{NA}	{NA}
MAR44G.1_GM000429	{Scaffold1:478297:480768:-}	{EEE47472.2; ATP-dependent helicase HrpB [Roseibium alexandrii DFL-11]}	{P37024; ATP-dependent RNA helicase HrpB }	{lagg:B0E33_07990; K03579 hrpB ATP-dependent helicase HrpB 3.6.4.13 --}	{WP.077290889.1; COG1643 HrpA-like RNA helicase J Translation, ribosomal structure and biogenesis ;}	{NA}	{GO:0004386; helicase activity; molecular_function GO:0005524; ATP binding; molecular_function GO:0003676; nucleic acid binding; molecular_function GO:0019079; viral genome replication; biological_process GO:0008026; ATP-dependent helicase activity; molecular_function}	{NA}	{NA}	{NA}	{NA}	{NA}	{false}	{NA}	{PF00271:Helicase conserved C-terminal domain PF00270:DEAD/DEAH box helicase PF07652:Flavivirus DEAD domain PF04408:Helicase associated domain (HA2)}
MAR44G.1_GM000430	{Scaffold1:480783:481820:-}	{WP_055670501.1; glucokinase [Roseibium alexandrii]}	{C3MBY4; Glucokinase }	{labp:FJ695_00775; K00845 glk glucokinase 2.7.1.2 Metabolism; Carbohydrate metabolism; Glycolysis / Gluconeogenesis [PATH:ko00010] Metabolism; Carbohydrate metabolism; Galactose metabolism [PATH:ko00052] Metabolism; Carbohydrate metabolism; Starch and sucrose metabolism [PATH:ko00500] Metabolism; Carbohydrate metabolism; Amino sugar and nucleotide sugar metabolism [PATH:ko00520] Metabolism; Biosy…	{WP.077290888.1; COG0837 Glucokinase G Carbohydrate transport and metabolism ;}	{NA}	{GO:0005524; ATP binding; molecular_function GO:0004594; pantothenate kinase activity; molecular_function GO:0004340; glucokinase activity; molecular_function GO:0051156; glucose 6-phosphate metabolic process; biological_process GO:0006096; glycolysis; biological_process}	{NA}	{NA}	{NA}	{NA}	{NA}	{false}	{NA}	{PF02685:Glucokinase PF03309:Type III pantothenate kinase}
MAR44G.1_GM000431	{Scaffold1:481817:482248:-}	{WP_055670500.1; methylglyoxal synthase [Roseibium alexandrii]}	{B2SC33; Methylglyoxal synthase }	{labp:FJ695_00770; K01734 mgsA methylglyoxal synthase 4.2.3.3 Metabolism; Carbohydrate metabolism; Propanoate metabolism [PATH:ko00640]}	{WP.022999719.1; COG1803 Methylglyoxal synthase G Carbohydrate transport and metabolism ;}	{NA}	{NA}	{NA}	{NA}	{NA}	{NA}	{NA}	{false}	{NA}	{NA}
MAR44G.1_GM000432	{Scaffold1:482291:482422:-}	{NA}	{NA}	{NA}	{NA}	{NA}	{NA}	{NA}	{NA}	{NA}	{NA}	{NA}	{false}	{NA}	{NA}
MAR44G.1_GM000433	{Scaffold1:482443:483306:-}	{WP_081450636.1; DUF1194 domain-containing protein [Roseibium alexandrii]}	{NA}	{NA}	{NA}	{NA}	{NA}	{NA}	{NA}	{NA}	{NA}	{YES}	{false}	{NA}	{NA}
MAR44G.1_GM000434	{Scaffold1:483528:483674:+}	{NA}	{NA}	{NA}	{NA}	{NA}	{NA}	{NA}	{NA}	{NA}	{NA}	{NA}	{false}	{NA}	{NA}
MAR44G.1_GM000435	{Scaffold1:483845:484828:+}	{WP_208981113.1; sugar-binding transcriptional regulator [Roseibium alexandrii]}	{NA}	{NA}	{WP.031268894.1; COG2390 DNA-binding transcriptional regulator LsrR, DeoR family K Transcription ;}	{NA}	{GO:0006355; regulation of transcription, DNA-dependent; biological_process GO:0006352; transcription initiation, DNA-dependent; biological_process GO:0016987; sigma factor activity; molecular_function GO:0030246; carbohydrate binding; molecular_function GO:0003700; sequence-specific DNA binding transcription factor activity; molecular_function GO:0003677; DNA binding; molecular_function}	{NA}	{NA}	{NA}	{NA}	{NA}	{false}	{NA}	{PF09339:IclR helix-turn-helix domain PF08281:Sigma-70, region 4 PF04545:Sigma-70, region 4 PF04539:Sigma-70 region 3 PF04198:Putative sugar-binding domain}
MAR44G.1_GM000436	{Scaffold1:484853:485899:+}	{EEE44625.2; putative ABC-type transport system, periplasmic component/surface lipoprotein [Roseibium alexandrii DFL-11]}	{NA}	{labp:FJ695_00755; K07335 bmpA, bmpB, tmpC basic membrane protein A and related proteins -- Environmental Information Processing; Membrane transport; ABC transporters [PATH:ko02010]}	{WP.022999724.1; COG1744 Lipoprotein Med, regulator of KinD/Spo0A, PBP1-ABC superfamily, includes NupN T Signal transduction mechanisms ;}	{NA}	{GO:0005886; plasma membrane; cellular_component}	{NA}	{NA}	{NA}	{NA}	{NA}	{false}	{NA}	{PF02608:Basic membrane protein}
MAR44G.1_GM000437	{Scaffold1:486011:486979:+}	{WP_144432028.1; BMP family ABC transporter substrate-binding protein [Roseibium alexandrii]}	{NA}	{labp:FJ695_00750; K07335 bmpA, bmpB, tmpC basic membrane protein A and related proteins -- Environmental Information Processing; Membrane transport; ABC transporters [PATH:ko02010]}	{WP.077290886.1; COG1744 Lipoprotein Med, regulator of KinD/Spo0A, PBP1-ABC superfamily, includes NupN T Signal transduction mechanisms ;}	{NA}	{GO:0005886; plasma membrane; cellular_component}	{NA}	{NA}	{NA}	{NA}	{NA}	{false}	{NA}	{PF02608:Basic membrane protein}
MAR44G.1_GM000438	{Scaffold1:487050:488603:+}	{WP_008196249.1; ABC transporter ATP-binding protein [Roseibium alexandrii]}	{O05253; Guanosine import ATP-binding protein NupO }	{labp:FJ695_00745; K23537 nupA general nucleoside transport system ATP-binding protein -- Environmental Information Processing; Membrane transport; ABC transporters [PATH:ko02010]}	{WP.077290885.1; COG3845 ABC-type guanosine uptake system NupNOPQ, ATPase component NupO F Nucleotide transport and metabolism ;}	{gnl|TC-DB|Q8DU37; 3.A.1.2.12 Putative sugar ABC transporter, ATP-binding protein - Streptococcus mutans.}	{GO:0003723; RNA binding; molecular_function GO:0016887; ATPase activity; molecular_function GO:0003924; GTPase activity; molecular_function GO:0016853; isomerase activity; molecular_function GO:0005524; ATP binding; molecular_function GO:0005525; GTP binding; molecular_function GO:0009507; chloroplast; cellular_component}	{NA}	{NA}	{NA}	{NA}	{NA}	{false}	{NA}	{PF06351:Allene oxide cyclase PF00005:ABC transporter PF01926:50S ribosome-binding GTPase PF03193:Protein of unknown function, DUF258 PF01479:S4 domain}
MAR44G.1_GM000439	{Scaffold1:488600:489706:+}	{WP_008194548.1; ABC transporter permease [Roseibium alexandrii]}	{NA}	{labp:FJ695_00740; K23535 nupB general nucleoside transport system permease protein -- Environmental Information Processing; Membrane transport; ABC transporters [PATH:ko02010]}	{WP.062490541.1; COG4603 ABC-type guanosine uptake system NupNOPQ, permease component NupP F Nucleotide transport and metabolism ;}	{NA}	{GO:0006810; transport; biological_process GO:0005215; NA GO:0016020; membrane; cellular_component}	{NA}	{NA}	{NA}	{NA}	{NA}	{false}	{NA}	{PF02653:Branched-chain amino acid transport system / permease component}
MAR44G.1_GM000440	{Scaffold1:489709:490677:+}	{WP_008189758.1; ABC transporter permease [Roseibium alexandrii]}	{NA}	{labp:FJ695_00735; K23536 nupC general nucleoside transport system permease protein -- Environmental Information Processing; Membrane transport; ABC transporters [PATH:ko02010]}	{WP.031268896.1; COG1079 ABC-type guanosine uptake system NupNOPQ, permease subunit NupQ F Nucleotide transport and metabolism ;}	{NA}	{GO:0016020; membrane; cellular_component GO:0005215; NA GO:0006810; transport; biological_process}	{NA}	{NA}	{NA}	{NA}	{NA}	{false}	{NA}	{PF02653:Branched-chain amino acid transport system / permease component}
MAR44G.1_GM000441	{Scaffold1:490674:491072:+}	{WP_008188579.1; cytidine deaminase [Roseibium alexandrii]}	{P56389; Cytidine deaminase }	{labp:FJ695_00730; K01489 cdd, CDA cytidine deaminase 3.5.4.5 Metabolism; Nucleotide metabolism; Pyrimidine metabolism [PATH:ko00240] Metabolism; Xenobiotics biodegradation and metabolism; Drug metabolism - other enzymes [PATH:ko00983]}	{WP.022999729.1; COG0295 Cytidine deaminase F Nucleotide transport and metabolism ;}	{NA}	{GO:0009972; cytidine deamination; biological_process GO:0008270; zinc ion binding; molecular_function GO:0004126; cytidine deaminase activity; molecular_function GO:0016787; hydrolase activity; molecular_function}	{NA}	{NA}	{NA}	{NA}	{NA}	{false}	{NA}	{PF08211:Cytidine and deoxycytidylate deaminase zinc-binding region PF00383:Cytidine and deoxycytidylate deaminase zinc-binding region}
MAR44G.1_GM000442	{Scaffold1:491079:491888:+}	{WP_008194546.1; purine-nucleoside phosphorylase [Roseibium alexandrii]}	{P77834; Purine nucleoside phosphorylase 1 }	{lagg:B0E33_07930; K03783 punA, PNP purine-nucleoside phosphorylase 2.4.2.1 Metabolism; Nucleotide metabolism; Purine metabolism [PATH:ko00230] Metabolism; Metabolism of cofactors and vitamins; Nicotinate and nicotinamide metabolism [PATH:ko00760]}	{WP.022999730.1; COG0005 Purine nucleoside phosphorylase F Nucleotide transport and metabolism ;}	{NA}	{GO:0003824; NA GO:0009116; nucleoside metabolic process; biological_process}	{NA}	{NA}	{NA}	{NA}	{NA}	{false}	{NA}	{PF01048:Phosphorylase superfamily}
MAR44G.1_GM000443	{Scaffold1:491885:492661:+}	{WP_040451415.1; deoxyribose-phosphate aldolase [Roseibium alexandrii]}	{Q8UJ09; Deoxyribose-phosphate aldolase }	{labp:FJ695_00720; K01619 deoC, DERA deoxyribose-phosphate aldolase 4.1.2.4 Metabolism; Carbohydrate metabolism; Pentose phosphate pathway [PATH:ko00030]}	{WP.055659333.1; COG0274 Deoxyribose-phosphate aldolase F Nucleotide transport and metabolism ;}	{NA}	{GO:0016829; lyase activity; molecular_function}	{NA}	{NA}	{NA}	{NA}	{NA}	{false}	{NA}	{PF01791:DeoC/LacD family aldolase}
MAR44G.1_GM000444	{Scaffold1:492663:493979:+}	{WP_008197020.1; thymidine phosphorylase [Roseibium alexandrii]}	{Q98GV5; Thymidine phosphorylase }	{lagg:B0E33_07920; K00758 deoA, TYMP thymidine phosphorylase 2.4.2.4 Metabolism; Nucleotide metabolism; Pyrimidine metabolism [PATH:ko00240] Metabolism; Xenobiotics biodegradation and metabolism; Drug metabolism - other enzymes [PATH:ko00983] Human Diseases; Cancer: specific types; Bladder cancer [PATH:ko05219]}	{WP.077290884.1; COG0213 Thymidine phosphorylase F Nucleotide transport and metabolism ;}	{NA}	{GO:0016747; transferase activity, transferring acyl groups other than amino-acyl groups; molecular_function GO:0016763; transferase activity, transferring pentosyl groups; molecular_function GO:0008610; lipid biosynthetic process; biological_process GO:0008152; NA GO:0006213; pyrimidine nucleoside metabolic process; biological_process GO:0016757; transferase activity, transferring glycosyl group…	{NA}	{NA}	{NA}	{NA}	{NA}	{false}	{NA}	{PF07831:Pyrimidine nucleoside phosphorylase C-terminal domain PF00591:Glycosyl transferase family, a/b domain PF08541:3-Oxoacyl-[acyl-carrier-protein (ACP)] synthase III C terminal }
MAR44G.1_GM000445	{Scaffold1:494047:495273:+}	{WP_055670560.1; phosphopentomutase [Roseibium alexandrii]}	{Q2KDR4; Phosphopentomutase }	{labp:FJ695_00710; K01839 deoB phosphopentomutase 5.4.2.7 Metabolism; Carbohydrate metabolism; Pentose phosphate pathway [PATH:ko00030] Metabolism; Nucleotide metabolism; Purine metabolism [PATH:ko00230]}	{WP.075283152.1; COG1015 Phosphopentomutase G Carbohydrate transport and metabolism ;}	{NA}	{GO:0003824; NA GO:0046872; metal ion binding; molecular_function}	{NA}	{NA}	{NA}	{NA}	{NA}	{false}	{NA}	{PF01676:Metalloenzyme superfamily PF01663:Type I phosphodiesterase / nucleotide pyrophosphatase}
MAR44G.1_GM000446	{Scaffold1:495294:496307:+}	{WP_055670494.1; adenosine deaminase [Roseibium alexandrii]}	{Q11C48; Adenine deaminase }	{labp:FJ695_00705; K01488 add, ADA adenosine deaminase 3.5.4.4 Metabolism; Nucleotide metabolism; Purine metabolism [PATH:ko00230] Human Diseases; Immune disease; Primary immunodeficiency [PATH:ko05340]}	{WP.077290883.1; COG1816 Adenosine deaminase F Nucleotide transport and metabolism ;}	{NA}	{GO:0006355; regulation of transcription, DNA-dependent; biological_process GO:0006275; regulation of DNA replication; biological_process GO:0019239; deaminase activity; molecular_function GO:0042025; host cell nucleus; cellular_component GO:0003700; sequence-specific DNA binding transcription factor activity; molecular_function GO:0003677; DNA binding; molecular_function GO:0009168; purine ribon…	{NA}	{NA}	{NA}	{NA}	{NA}	{false}	{NA}	{PF00962:Adenosine/AMP deaminase PF00511:E2 (early) protein, C terminal}
MAR44G.1_GM000447	{Scaffold1:496313:497566:+}	{WP_055670493.1; DUF1688 family protein [Roseibium alexandrii]}	{NA}	{NA}	{NA}	{NA}	{NA}	{NA}	{NA}	{NA}	{NA}	{NA}	{false}	{NA}	{NA}
MAR44G.1_GM000448	{Scaffold1:497634:498263:+}	{WP_040451420.1; uracil phosphoribosyltransferase [Roseibium alexandrii]}	{C3MBH2; Uracil phosphoribosyltransferase }	{labr:CHH27_24160; K00761 upp, UPRT uracil phosphoribosyltransferase 2.4.2.9 Metabolism; Nucleotide metabolism; Pyrimidine metabolism [PATH:ko00240]}	{WP.022999737.1; COG0035 Uracil phosphoribosyltransferase F Nucleotide transport and metabolism ;}	{NA}	{GO:0009116; nucleoside metabolic process; biological_process GO:0000287; magnesium ion binding; molecular_function GO:0004749; ribose phosphate diphosphokinase activity; molecular_function GO:0009165; nucleotide biosynthetic process; biological_process}	{NA}	{NA}	{NA}	{NA}	{NA}	{false}	{NA}	{PF00156:Phosphoribosyl transferase domain PF14572:Phosphoribosyl synthetase-associated domain}
MAR44G.1_GM000449	{Scaffold1:498429:498932:+}	{WP_050776037.1; TIGR02281 family clan AA aspartic protease [Roseibium alexandrii]}	{NA}	{labp:FJ695_00690; K06985 K06985 aspartyl protease family protein -- Cellular Processes; Cell growth and death; Cell cycle - Caulobacter [PATH:ko04112]}	{WP.077290880.1; COG3577 Predicted aspartyl protease R General function prediction only ;}	{NA}	{GO:0004190; aspartic-type endopeptidase activity; molecular_function GO:0006508; proteolysis; biological_process}	{NA}	{NA}	{NA}	{NA}	{NA}	{false}	{NA}	{PF09668:Aspartyl protease}
MAR44G.1_GM000450	{Scaffold1:498975:500498:+}	{WP_008196340.1; phosphomannomutase/phosphoglucomutase [Roseibium alexandrii]}	{NA}	{labp:FJ695_00685; K15778 pmm-pgm phosphomannomutase / phosphoglucomutase [EC:5.4.2.8 5.4.2.2] 5.4.2.8,5.4.2.2 Metabolism; Carbohydrate metabolism; Glycolysis / Gluconeogenesis [PATH:ko00010] Metabolism; Carbohydrate metabolism; Pentose phosphate pathway [PATH:ko00030] Metabolism; Carbohydrate metabolism; Fructose and mannose metabolism [PATH:ko00051] Metabolism; Carbohydrate metabolism; Galactos…	{NA}	{NA}	{GO:0005975; carbohydrate metabolic process; biological_process GO:0016868; intramolecular transferase activity, phosphotransferases; molecular_function}	{NA}	{NA}	{NA}	{NA}	{NA}	{false}	{NA}	{PF02878:Phosphoglucomutase/phosphomannomutase, alpha/beta/alpha domain I PF02880:Phosphoglucomutase/phosphomannomutase, alpha/beta/alpha domain III PF00408:Phosphoglucomutase/phosphomannomutase, C-terminal domain PF02879:Phosphoglucomutase/phosphomannomutase, alpha/beta/alpha domain II}
MAR44G.1_GM000451	{Scaffold1:500503:501567:+}	{WP_055670491.1; galactose mutarotase [Roseibium alexandrii]}	{Q66HG4; Galactose mutarotase }	{labp:FJ695_00680; K01785 galM, GALM aldose 1-epimerase 5.1.3.3 Metabolism; Carbohydrate metabolism; Glycolysis / Gluconeogenesis [PATH:ko00010] Metabolism; Carbohydrate metabolism; Galactose metabolism [PATH:ko00052]}	{WP.077290878.1; COG2017 Galactose mutarotase or related enzyme G Carbohydrate transport and metabolism ;}	{NA}	{GO:0005975; carbohydrate metabolic process; biological_process GO:0016853; isomerase activity; molecular_function}	{NA}	{NA}	{NA}	{NA}	{NA}	{false}	{UZJ45781.1_; GH43 beta-xylosidase (EC 3.2.1.37); alpha-L-arabinofuranosidase (EC 3.2.1.55); xylanase (EC 3.2.1.8); alpha-1,2-L-arabinofuranosidase (EC 3.2.1.-); exo-alpha-1,5-L-arabinofuranosidase (EC 3.2.1.-); [inverting] exo-alpha-1,5-L-arabinanase (EC 3.2.1.-); beta-1,3-xylosidase (EC 3.2.1.72); [inverting] exo-alpha-1,5-L-arabinanase (EC 3.2.1.-); [inverting] endo-alpha-1,5-L-arabinanase (EC…	{PF01263:Aldose 1-epimerase}
MAR44G.1_GM000452	{Scaffold1:501622:502650:+}	{WP_055670490.1; histone deacetylase family protein [Roseibium alexandrii]}	{Q9I6H0; Acetylpolyamine amidohydrolase 2 }	{NA}	{WP.077290877.1; COG0123 Acetoin utilization deacetylase AcuC or a related deacetylase Q Secondary metabolites biosynthesis, transport and catabolism ;}	{NA}	{NA}	{NA}	{NA}	{NA}	{NA}	{NA}	{false}	{NA}	{NA}
MAR44G.1_GM000453	{Scaffold1:502666:503286:-}	{WP_008196055.1; HAD family phosphatase [Roseibium alexandrii]}	{NA}	{labp:FJ695_00670; K01560 E3.8.1.2 2-haloacid dehalogenase 3.8.1.2 Metabolism; Xenobiotics biodegradation and metabolism; Chloroalkane and chloroalkene degradation [PATH:ko00625] Metabolism; Xenobiotics biodegradation and metabolism; Chlorocyclohexane and chlorobenzene degradation [PATH:ko00361]}	{WP.055657455.1; COG1011 FMN and 5-amino-6-(5-phospho-D-ribitylamino)uracil phosphatase YigB, HAD superfamily (riboflavin biosynthesis) H Coenzyme transport and metabolism ;}	{NA}	{GO:0016791; phosphatase activity; molecular_function}	{NA}	{NA}	{NA}	{NA}	{NA}	{false}	{NA}	{PF12689:Acid Phosphatase}
MAR44G.1_GM000454	{Scaffold1:503359:504291:+}	{CTQ65216.1; phosphonate ABC transporter, periplasmic phosphonate binding protein [Roseibium alexandrii]}	{NA}	{labp:FJ695_00665; K02044 phnD phosphonate transport system substrate-binding protein -- Environmental Information Processing; Membrane transport; ABC transporters [PATH:ko02010]}	{WP.077290876.1; COG3221 ABC-type phosphate/phosphonate transport system, periplasmic component P Inorganic ion transport and metabolism ;}	{NA}	{GO:0005215; NA GO:0006810; transport; biological_process}	{NA}	{NA}	{NA}	{NA}	{NA}	{false}	{NA}	{PF00497:Bacterial extracellular solute-binding proteins, family 3}
MAR44G.1_GM000455	{Scaffold1:504373:505557:-}	{WP_055670487.1; acetate/propionate family kinase [Roseibium alexandrii]}	{B8EIS2; Acetate kinase }	{labp:FJ695_00660; K00925 ackA acetate kinase 2.7.2.1 Metabolism; Carbohydrate metabolism; Pyruvate metabolism [PATH:ko00620] Metabolism; Carbohydrate metabolism; Propanoate metabolism [PATH:ko00640] Metabolism; Energy metabolism; Carbon fixation pathways in prokaryotes [PATH:ko00720] Metabolism; Energy metabolism; Methane metabolism [PATH:ko00680] Metabolism; Metabolism of other amino acids; Tau…	{WP.077290875.1; COG0282 Acetate kinase C Energy production and conversion ;}	{NA}	{GO:0008152; NA GO:0005622; intracellular; cellular_component GO:0016301; kinase activity; molecular_function GO:0016310; phosphorylation; biological_process GO:0016774; phosphotransferase activity, carboxyl group as acceptor; molecular_function}	{PHI:9843; A0A0H3Q0Y8 ackA 666 Vibrio cholerae infection Drosophila melanogaster (related: fruit fly) Acetate kinase Gene deletion: full unaffected pathogenicity}	{NA}	{NA}	{NA}	{NA}	{false}	{NA}	{PF00871:Acetokinase family}
MAR44G.1_GM000456	{Scaffold1:505560:506972:-}	{WP_055670486.1; bifunctional enoyl-CoA hydratase/phosphate acetyltransferase [Roseibium alexandrii]}	{Q9X448; Phosphate acetyltransferase }	{NA}	{WP.077290874.1; COG2030 Acyl-CoA dehydratase PaaZ I Lipid transport and metabolism ;}	{NA}	{GO:0016491; oxidoreductase activity; molecular_function GO:0008152; NA GO:0016746; transferase activity, transferring acyl groups; molecular_function}	{NA}	{NA}	{NA}	{NA}	{NA}	{false}	{NA}	{PF01515:Phosphate acetyl/butaryl transferase PF01575:MaoC like domain}
MAR44G.1_GM000457	{Scaffold1:507088:507714:-}	{WP_268873415.1; pilus assembly protein [Roseibium alexandrii]}	{NA}	{NA}	{WP.031268900.1; COG4961 Flp pilus assembly protein TadG, includes N-terminal TadE domain UW Intracellular trafficking, secretion, and vesicular transport ; Extracellular structures ;}	{NA}	{NA}	{NA}	{NA}	{NA}	{NA}	{NA}	{false}	{NA}	{NA}
MAR44G.1_GM000458	{Scaffold1:507698:508267:-}	{WP_081450547.1; pilus assembly protein [Roseibium alexandrii]}	{NA}	{NA}	{WP.031268901.1; COG4961 Flp pilus assembly protein TadG, includes N-terminal TadE domain UW Intracellular trafficking, secretion, and vesicular transport ; Extracellular structures ;}	{NA}	{NA}	{NA}	{NA}	{NA}	{NA}	{NA}	{false}	{NA}	{NA}
MAR44G.1_GM000459	{Scaffold1:508290:508748:-}	{WP_040451422.1; pilus assembly protein N-terminal domain-containing protein [Roseibium alexandrii]}	{NA}	{NA}	{WP.013654397.1; COG4964 Flp pilus assembly protein, secretin CpaC UW Intracellular trafficking, secretion, and vesicular transport ; Extracellular structures ;}	{NA}	{GO:0006633; fatty acid biosynthetic process; biological_process GO:0004315; 3-oxoacyl-[acyl-carrier-protein] synthase activity; molecular_function}	{NA}	{NA}	{NA}	{NA}	{YES}	{false}	{NA}	{PF08545:3-Oxoacyl-[acyl-carrier-protein (ACP)] synthase III}
MAR44G.1_GM000460	{Scaffold1:509138:509371:+}	{WP_008192800.1; Flp family type IVb pilin [Roseibium alexandrii]}	{NA}	{pphr:APZ00_03260; K02651 flp, pilA pilus assembly protein Flp/PilA -- Cellular Processes; Cell growth and death; Cell cycle - Caulobacter [PATH:ko04112]}	{WP.058898029.1; COG3847 Flp pilus assembly protein, pilin Flp UW Intracellular trafficking, secretion, and vesicular transport ; Extracellular structures ;}	{gnl|TC-DB|B3R344; 1.E.52.3.2 Flp pilin component OS=Cupriavidus taiwanensis (strain R1 / LMG 19424) GN=flp-1 PE=4 SV=1}	{NA}	{NA}	{NA}	{NA}	{NA}	{NA}	{false}	{NA}	{NA}
MAR44G.1_GM000461	{Scaffold1:509482:509994:+}	{WP_008192348.1; prepilin peptidase [Roseibium alexandrii]}	{NA}	{labp:FJ695_00630; K02278 cpaA, tadV prepilin peptidase CpaA 3.4.23.43 --}	{WP.022999752.1; COG4960 Flp pilus assembly protein, peptidase CpaA OT Posttranslational modification, protein turnover, chaperones ; Signal transduction mechanisms ;}	{NA}	{GO:0004190; aspartic-type endopeptidase activity; molecular_function GO:0016020; membrane; cellular_component}	{NA}	{NA}	{NA}	{NA}	{NA}	{false}	{NA}	{PF01478:Type IV leader peptidase family}
MAR44G.1_GM000462	{Scaffold1:510284:510985:+}	{WP_055670482.1; Flp pilus assembly protein CpaB [Roseibium alexandrii]}	{NA}	{labp:FJ695_00625; K02279 cpaB, rcpC pilus assembly protein CpaB -- --}	{WP.077293185.1; COG3745 Flp pilus assembly protein CpaB UW Intracellular trafficking, secretion, and vesicular transport ; Extracellular structures ;}	{NA}	{NA}	{NA}	{NA}	{NA}	{NA}	{NA}	{false}	{NA}	{NA}
MAR44G.1_GM000463	{Scaffold1:510982:512433:+}	{WP_144432027.1; type II and III secretion system protein family protein [Roseibium alexandrii]}	{NA}	{labp:FJ695_00620; K02280 cpaC, rcpA pilus assembly protein CpaC -- --}	{WP.077290872.1; COG4964 Flp pilus assembly protein, secretin CpaC UW Intracellular trafficking, secretion, and vesicular transport ; Extracellular structures ;}	{NA}	{GO:0009306; protein secretion; biological_process}	{NA}	{NA}	{NA}	{NA}	{NA}	{false}	{NA}	{PF00263:Bacterial type II and III secretion system protein}
MAR44G.1_GM000464	{Scaffold1:512444:513157:+}	{WP_134853036.1; CpaD family pilus assembly protein [Roseibium alexandrii]}	{NA}	{labp:FJ695_00615; K02281 cpaD pilus assembly protein CpaD -- --}	{WP.062490514.1; COG5461 Type IV pilus biogenesis protein CpaD/CtpE W Extracellular structures ;}	{NA}	{NA}	{NA}	{NA}	{NA}	{NA}	{NA}	{false}	{NA}	{NA}
MAR44G.1_GM000465	{Scaffold1:513192:514472:+}	{WP_235812856.1; CpaE family protein [Roseibium alexandrii]}	{NA}	{labp:FJ695_00610; K02282 cpaE, tadZ pilus assembly protein CpaE -- --}	{WP.077290871.1; COG4963 Flp pilus assembly ATPase CpaE/TadZ, contains N-terminal REC/TadZ_N domain UW Intracellular trafficking, secretion, and vesicular transport ; Extracellular structures ;}	{gnl|TC-DB|Q9L715; 3.A.7.18.1 CpaE OS=Caulobacter crescentus GN=cpaE PE=4 SV=1}	{GO:0005524; ATP binding; molecular_function GO:0016491; oxidoreductase activity; molecular_function GO:0055114; oxidation-reduction process; biological_process}	{NA}	{NA}	{NA}	{NA}	{NA}	{false}	{NA}	{PF00142:4Fe-4S iron sulfur cluster binding proteins, NifH/frxC family}
MAR44G.1_GM000466	{Scaffold1:514569:516020:+}	{OJJ12913.1; protein kinase [Alphaproteobacteria bacterium AO1-B]}	{NA}	{labp:FJ695_00605; K02283 cpaF, tadA pilus assembly protein CpaF 7.4.2.8 --}	{WP.055657464.1; COG4962 Pilus assembly protein, ATPase of CpaF family UW Intracellular trafficking, secretion, and vesicular transport ; Extracellular structures ;}	{gnl|TC-DB|Q9L714; 3.A.7.18.1 CpaF OS=Caulobacter crescentus GN=cpaF PE=4 SV=1}	{GO:0000166; nucleotide binding; molecular_function GO:0051301; cell division; biological_process GO:0007049; cell cycle; biological_process GO:0006810; transport; biological_process GO:0008026; ATP-dependent helicase activity; molecular_function GO:0007059; chromosome segregation; biological_process GO:0003924; GTPase activity; molecular_function GO:0005524; ATP binding; molecular_function GO:00…	{PHI:3843; Q6D927 tadA 29471 Pectobacterium atrosepticum soft rot (potato) Solanum tuberosum (related: potato) Regulation of the Flp/Tad Pilus Gene deletion; gene complementation reduced virulence}	{VFG043634; VF0612 Flp pili VV1_RS15610 CpaF family protein Flp pili are polymers of the mature Flp pilin protein, and they are assembled and secreted by a complex of proteins encoded by the tad operon. nan The V. vulnificus genome codes for three distinct tad loci. all three tad operons are required for V. vulnificus pathogenicity as the cryptic pili contribute to host cell and tissue invasion, …	{NA}	{NA}	{NA}	{true}	{NA}	{PF00005:ABC transporter PF06414:Zeta toxin PF00009:Elongation factor Tu GTP binding domain PF00270:DEAD/DEAH box helicase PF01580:FtsK/SpoIIIE family PF00437:Type II/IV secretion system protein}
MAR44G.1_GM000467	{Scaffold1:516029:517048:+}	{WP_008196993.1; type II secretion system F family protein [Roseibium alexandrii]}	{NA}	{labp:FJ695_00600; K12510 tadB tight adherence protein B -- --}	{WP.022999758.1; COG4965 Flp pilus assembly protein TadB UW Intracellular trafficking, secretion, and vesicular transport ; Extracellular structures ;}	{NA}	{GO:0005524; ATP binding; molecular_function GO:0043039; tRNA aminoacylation; biological_process GO:0016020; membrane; cellular_component GO:0016876; ligase activity, forming aminoacyl-tRNA and related compounds; molecular_function}	{NA}	{NA}	{NA}	{NA}	{NA}	{false}	{NA}	{PF01956:Integral membrane protein DUF106 PF00749:tRNA synthetases class I (E and Q), catalytic domain}
MAR44G.1_GM000468	{Scaffold1:517061:518035:+}	{WP_055670478.1; type II secretion system F family protein [Roseibium alexandrii]}	{NA}	{labp:FJ695_00595; K12511 tadC tight adherence protein C -- --}	{WP.022999759.1; COG2064 Flp pilus assembly protein TadC W Extracellular structures ;}	{NA}	{NA}	{NA}	{NA}	{NA}	{NA}	{NA}	{false}	{NA}	{NA}
MAR44G.1_GM000469	{Scaffold1:518265:519044:-}	{WP_055670477.1; tetratricopeptide repeat protein [Roseibium alexandrii]}	{NA}	{NA}	{WP.022999760.1; COG5010 Flp pilus assembly protein TadD, contains TPR repeats UW Intracellular trafficking, secretion, and vesicular transport ; Extracellular structures ;}	{NA}	{GO:0005515; protein binding; molecular_function GO:0042802; identical protein binding; molecular_function}	{NA}	{NA}	{NA}	{NA}	{NA}	{false}	{NA}	{PF00515:Tetratricopeptide repeat PF07721:Tetratricopeptide repeat PF13181:Tetratricopeptide repeat PF13176:Tetratricopeptide repeat PF13174:Tetratricopeptide repeat}
MAR44G.1_GM000470	{Scaffold1:519226:520623:+}	{WP_008192706.1; leucyl aminopeptidase family protein [Roseibium alexandrii]}	{Q3A831; Probable cytosol aminopeptidase }	{labp:FJ695_00585; K01255 CARP, pepA leucyl aminopeptidase 3.4.11.1 Metabolism; Metabolism of other amino acids; Glutathione metabolism [PATH:ko00480]}	{WP.077290870.1; COG0260 Leucyl aminopeptidase E Amino acid transport and metabolism ;}	{NA}	{GO:0005622; intracellular; cellular_component GO:0004177; aminopeptidase activity; molecular_function GO:0006508; proteolysis; biological_process}	{NA}	{NA}	{NA}	{NA}	{NA}	{false}	{NA}	{PF00883:Cytosol aminopeptidase family, catalytic domain}
MAR44G.1_GM000471	{Scaffold1:520684:521034:+}	{WP_008190665.1; MarR family transcriptional regulator [Roseibium alexandrii]}	{NA}	{NA}	{WP.006934185.1; COG1846 DNA-binding transcriptional regulator, MarR family K Transcription ;}	{NA}	{GO:0006355; regulation of transcription, DNA-dependent; biological_process GO:0003677; DNA binding; molecular_function GO:0003700; sequence-specific DNA binding transcription factor activity; molecular_function GO:0005622; intracellular; cellular_component}	{NA}	{NA}	{NA}	{NA}	{NA}	{false}	{NA}	{PF01022:Bacterial regulatory protein, arsR family PF13463:Winged helix DNA-binding domain PF09339:IclR helix-turn-helix domain PF01047:MarR family PF00392:Bacterial regulatory proteins, gntR family}
MAR44G.1_GM000472	{Scaffold1:521120:521947:+}	{WP_040451435.1; NlpC/P60 family protein [Roseibium alexandrii]}	{NA}	{NA}	{WP.077290869.1; COG0791 Cell wall-associated hydrolase, NlpC_P60 family M Cell wall/membrane/envelope biogenesis ;}	{NA}	{GO:0005515; protein binding; molecular_function}	{NA}	{NA}	{NA}	{NA}	{NA}	{false}	{NA}	{PF00018:SH3 domain}
MAR44G.1_GM000473	{Scaffold1:521986:523215:-}	{WP_055670554.1; DNA recombination protein RmuC [Roseibium alexandrii]}	{NA}	{labp:FJ695_00570; K09760 rmuC DNA recombination protein RmuC -- --}	{WP.035908085.1; COG1322 DNA anti-recombination protein (rearrangement mutator) RmuC L Replication, recombination and repair ;}	{NA}	{GO:0006412; translation; biological_process GO:0003735; structural constituent of ribosome; molecular_function GO:0005577; fibrinogen complex; cellular_component GO:0051258; protein polymerization; biological_process GO:0016020; membrane; cellular_component GO:0030674; protein binding, bridging; molecular_function GO:0005102; receptor binding; molecular_function GO:0009405; pathogenesis; biologi…	{NA}	{NA}	{NA}	{NA}	{NA}	{false}	{NA}	{PF00312:Ribosomal protein S15 PF05531:Nucleopolyhedrovirus P10 protein PF05791:Bacillus haemolytic enterotoxin (HBL) PF04728:Lipoprotein leucine-zipper PF08702:Fibrinogen alpha/beta chain family}
MAR44G.1_GM000474	{Scaffold1:523248:523817:+}	{WP_055670474.1; peptide deformylase [Roseibium alexandrii]}	{Q92SH6; Peptide deformylase }	{labp:FJ695_00565; K01462 PDF, def peptide deformylase 3.5.1.88 --}	{WP.031268905.1; COG0242 Peptide deformylase J Translation, ribosomal structure and biogenesis ;}	{NA}	{NA}	{NA}	{NA}	{NA}	{NA}	{NA}	{false}	{NA}	{NA}
MAR44G.1_GM000475	{Scaffold1:523882:524799:+}	{WP_040451439.1; methionyl-tRNA formyltransferase [Roseibium alexandrii]}	{B2SC20; Methionyl-tRNA formyltransferase }	{labp:FJ695_00555; K00604 MTFMT, fmt methionyl-tRNA formyltransferase 2.1.2.9 Metabolism; Metabolism of cofactors and vitamins; One carbon pool by folate [PATH:ko00670] Genetic Information Processing; Translation; Aminoacyl-tRNA biosynthesis [PATH:ko00970]}	{WP.077290866.1; COG0223 Methionyl-tRNA formyltransferase J Translation, ribosomal structure and biogenesis ;}	{NA}	{GO:0016742; hydroxymethyl-, formyl- and related transferase activity; molecular_function GO:0009058; biosynthetic process; biological_process}	{NA}	{NA}	{NA}	{NA}	{NA}	{false}	{NA}	{PF02911:Formyl transferase, C-terminal domain PF00551:Formyl transferase}
MAR44G.1_GM000476	{Scaffold1:524819:525358:+}	{WP_008194314.1; N-acetyltransferase [Roseibium alexandrii]}	{NA}	{labp:FJ695_00550; K03824 yhbS putative acetyltransferase 2.3.1.- --}	{WP.077290865.1; COG3153 Predicted N-acetyltransferase YhbS R General function prediction only ;}	{NA}	{GO:0008080; N-acetyltransferase activity; molecular_function}	{NA}	{NA}	{NA}	{NA}	{NA}	{false}	{NA}	{PF00583:Acetyltransferase (GNAT) family PF13508:Acetyltransferase (GNAT) domain}
MAR44G.1_GM000477	{Scaffold1:525367:526188:+}	{OJJ12923.1; tRNA pseudouridine(38-40) synthase TruA [Alphaproteobacteria bacterium AO1-B]}	{Q0ASJ7; tRNA pseudouridine synthase A }	{labp:FJ695_00545; K06173 truA, PUS1 tRNA pseudouridine38-40 synthase 5.4.99.12 --}	{NA}	{NA}	{GO:0003723; RNA binding; molecular_function GO:0009982; pseudouridine synthase activity; molecular_function GO:0009451; RNA modification; biological_process GO:0001522; pseudouridine synthesis; biological_process}	{NA}	{NA}	{NA}	{NA}	{NA}	{false}	{NA}	{PF01416:tRNA pseudouridine synthase}
MAR44G.1_GM000478	{Scaffold1:526270:528159:-}	{SHK16425.1; NACHT domain-containing protein [Ruegeria lacuscaerulensis ITI-1157]}	{NA}	{NA}	{WP.025311503.1; COG5635 Predicted NTPase, NACHT family domain T Signal transduction mechanisms ;}	{NA}	{GO:0006810; transport; biological_process GO:0005524; ATP binding; molecular_function GO:0004064; arylesterase activity; molecular_function}	{NA}	{NA}	{NA}	{NA}	{NA}	{false}	{NA}	{PF00437:Type II/IV secretion system protein PF01731:Arylesterase}
MAR44G.1_GM000479	{Scaffold1:528354:529163:-}	{OJJ12924.1; hypothetical protein BKI51_02320 [Alphaproteobacteria bacterium AO1-B]}	{NA}	{NA}	{WP.077290863.1; COG5473 Uncharacterized membrane protein S Function unknown ;}	{NA}	{NA}	{NA}	{NA}	{NA}	{NA}	{NA}	{true}	{NA}	{NA}
MAR44G.1_GM000480	{Scaffold1:529266:531509:-}	{CTQ65141.1; putative MscS family protein YkuT [Roseibium alexandrii]}	{NA}	{labp:FJ695_00535; K22044 ybiO moderate conductance mechanosensitive channel -- --}	{WP.077290862.1; COG0668 Small-conductance mechanosensitive channel M Cell wall/membrane/envelope biogenesis ;}	{NA}	{GO:0006508; proteolysis; biological_process GO:0008233; peptidase activity; molecular_function GO:0016020; membrane; cellular_component GO:0055085; transmembrane transport; biological_process}	{NA}	{NA}	{NA}	{NA}	{NA}	{false}	{NA}	{PF04647:Accessory gene regulator B PF00924:Mechanosensitive ion channel}
MAR44G.1_GM000481	{Scaffold1:531696:532112:-}	{WP_055670468.1; DUF4345 domain-containing protein [Roseibium alexandrii]}	{NA}	{NA}	{NA}	{NA}	{NA}	{NA}	{NA}	{NA}	{NA}	{NA}	{false}	{NA}	{NA}
MAR44G.1_GM000482	{Scaffold1:532179:532328:-}	{WP_186009010.1; hypothetical protein [Roseibium alexandrii]}	{NA}	{NA}	{NA}	{NA}	{NA}	{NA}	{NA}	{NA}	{NA}	{NA}	{false}	{NA}	{NA}
MAR44G.1_GM000483	{Scaffold1:532503:534269:+}	{WP_081450548.1; arylsulfatase [Roseibium alexandrii]}	{NA}	{NA}	{WP.044025621.1; COG3119 Arylsulfatase A or related enzyme, AlkP superfamily P Inorganic ion transport and metabolism ;}	{NA}	{GO:0008484; sulfuric ester hydrolase activity; molecular_function GO:0008152; NA GO:0003824; NA}	{NA}	{NA}	{NA}	{NA}	{NA}	{false}	{NA}	{PF01663:Type I phosphodiesterase / nucleotide pyrophosphatase PF00884:Sulfatase}
MAR44G.1_GM000484	{Scaffold1:534970:535392:+}	{WP_040451441.1; DUF805 domain-containing protein [Roseibium alexandrii]}	{NA}	{NA}	{WP.013654377.1; COG3152 Uncharacterized membrane protein YhaH, DUF805 family S Function unknown ;}	{NA}	{GO:0016021; integral to membrane; cellular_component}	{NA}	{NA}	{NA}	{NA}	{NA}	{true}	{NA}	{PF05656:Protein of unknown function (DUF805)}
MAR44G.1_GM000485	{Scaffold1:535429:536592:+}	{WP_040451443.1; succinyl-diaminopimelate desuccinylase [Roseibium alexandrii]}	{B1ZGA7; Succinyl-diaminopimelate desuccinylase }	{labp:FJ695_00525; K01439 dapE succinyl-diaminopimelate desuccinylase 3.5.1.18 Metabolism; Amino acid metabolism; Lysine biosynthesis [PATH:ko00300]}	{WP.077290861.1; COG0624 Acetylornithine deacetylase/Succinyl-diaminopimelate desuccinylase or related deacylase E Amino acid transport and metabolism ;}	{NA}	{GO:0008152; NA GO:0016787; hydrolase activity; molecular_function}	{NA}	{NA}	{NA}	{NA}	{NA}	{false}	{NA}	{PF01546:Peptidase family M20/M25/M40}
MAR44G.1_GM000486	{Scaffold1:536610:537203:+}	{WP_040451445.1; hypothetical protein [Roseibium alexandrii]}	{NA}	{NA}	{NA}	{NA}	{NA}	{NA}	{NA}	{NA}	{NA}	{NA}	{false}	{NA}	{NA}
MAR44G.1_GM000487	{Scaffold1:537276:538127:-}	{WP_008191883.1; 2,3,4,5-tetrahydropyridine-2,6-dicarboxylate N-succinyltransferase [Roseibium alexandrii]}	{Q11LD4; 2,3,4,5-tetrahydropyridine-2,6-dicarboxylate N-succinyltransferase }	{lap:ACP90_24240; K00674 dapD 2,3,4,5-tetrahydropyridine-2,6-dicarboxylate N-succinyltransferase 2.3.1.117 Metabolism; Amino acid metabolism; Lysine biosynthesis [PATH:ko00300]}	{WP.077290860.1; COG2171 Tetrahydrodipicolinate N-succinyltransferase E Amino acid transport and metabolism ;}	{NA}	{NA}	{NA}	{NA}	{NA}	{NA}	{NA}	{false}	{NA}	{NA}
MAR44G.1_GM000488	{Scaffold1:538388:539293:+}	{OJJ12930.1; hypothetical protein BKI51_02350 [Alphaproteobacteria bacterium AO1-B]}	{NA}	{NA}	{WP.017468224.1; COG0697 Permease of the drug/metabolite transporter (DMT) superfamily GER Carbohydrate transport and metabolism ; Amino acid transport and metabolism ; General function prediction only ;}	{gnl|TC-DB|W1KYZ6; 2.A.7.38.2 Membrane protein OS=Agrobacterium radiobacter DSM 30147 GN=L902_12140 PE=4 SV=1}	{GO:0016020; membrane; cellular_component}	{NA}	{NA}	{NA}	{NA}	{NA}	{false}	{NA}	{PF00892:EamA-like transporter family}
MAR44G.1_GM000489	{Scaffold1:539299:540162:-}	{OJJ12931.1; transcriptional regulator [Alphaproteobacteria bacterium AO1-B]}	{NA}	{labp:FJ695_00500; K03566 gcvA LysR family transcriptional regulator, glycine cleavage system transcriptional activator -- Cellular Processes; Cellular community - prokaryotes; Biofilm formation - Escherichia coli [PATH:ko02026]}	{WP.077290850.1; COG0583 DNA-binding transcriptional regulator, LysR family K Transcription ;}	{NA}	{GO:0043565; sequence-specific DNA binding; molecular_function GO:0006355; regulation of transcription, DNA-dependent; biological_process GO:0006289; nucleotide-excision repair; biological_process GO:0003700; sequence-specific DNA binding transcription factor activity; molecular_function GO:0000439; core TFIIH complex; cellular_component}	{NA}	{NA}	{NA}	{ARO:3003665; NmcR 134.035 antibiotic inactivation enzyme, determinant of beta-lactam resistance, gene modulating beta-lactam resistance }	{NA}	{false}	{NA}	{PF00126:Bacterial regulatory helix-turn-helix protein, lysR family PF02954:Bacterial regulatory protein, Fis family PF06331:Transcription factor TFIIH complex subunit Tfb5 PF01381:Helix-turn-helix}
MAR44G.1_GM000490	{Scaffold1:540234:540977:-}	{WP_144432026.1; pyrimidine 5'-nucleotidase [Roseibium alexandrii]}	{NA}	{labp:FJ695_00495; K07025 K07025 putative hydrolase of the HAD superfamily -- --}	{WP.035910033.1; COG1011 FMN and 5-amino-6-(5-phospho-D-ribitylamino)uracil phosphatase YigB, HAD superfamily (riboflavin biosynthesis) H Coenzyme transport and metabolism ;}	{NA}	{GO:0016791; phosphatase activity; molecular_function}	{NA}	{NA}	{NA}	{NA}	{NA}	{false}	{NA}	{PF12689:Acid Phosphatase}
MAR44G.1_GM000491	{Scaffold1:540974:541861:-}	{WP_055670461.1; acetylglutamate kinase [Roseibium alexandrii]}	{Q98D76; Acetylglutamate kinase }	{lagg:B0E33_07590; K00930 argB acetylglutamate kinase 2.7.2.8 Metabolism; Amino acid metabolism; Arginine biosynthesis [PATH:ko00220]}	{WP.023002261.1; COG0548 N-acetylglutamate kinase E Amino acid transport and metabolism ;}	{NA}	{NA}	{NA}	{NA}	{NA}	{NA}	{NA}	{false}	{NA}	{NA}
MAR44G.1_GM000492	{Scaffold1:541967:542614:-}	{WP_055670460.1; ribosome biogenesis GTP-binding protein YihA/YsxC [Roseibium alexandrii]}	{Q2YJR1; Probable GTP-binding protein EngB }	{labp:FJ695_00485; K03978 engB GTP-binding protein -- --}	{WP.023002260.1; COG0218 GTP-binding protein EngB required for normal cell division D Cell cycle control, cell division, chromosome partitioning ;}	{NA}	{GO:0016817; hydrolase activity, acting on acid anhydrides; molecular_function GO:0007264; small GTPase mediated signal transduction; biological_process GO:0007049; cell cycle; biological_process GO:0016020; membrane; cellular_component GO:0003924; GTPase activity; molecular_function GO:0015093; ferrous iron transmembrane transporter activity; molecular_function GO:0005525; GTP binding; molecular…	{NA}	{NA}	{NA}	{NA}	{NA}	{false}	{NA}	{PF03193:Protein of unknown function, DUF258 PF00350:Dynamin family PF02421:Ferrous iron transport protein B PF00735:Septin PF05049:Interferon-inducible GTPase (IIGP) PF08477:Ras of Complex, Roc, domain of DAPkinase PF04548:AIG1 family PF00009:Elongation factor Tu GTP binding domain PF01926:50S ribosome-binding GTPase PF00005:ABC transporter}
MAR44G.1_GM000493	{Scaffold1:542625:543305:-}	{WP_055670459.1; CatB-related O-acetyltransferase [Roseibium alexandrii]}	{P50870; Streptogramin A acetyltransferase }	{labp:FJ695_00480; K18234 vat virginiamycin A acetyltransferase 2.3.1.- --}	{WP.077290848.1; COG0110 Acetyltransferase, isoleucine patch superfamily R General function prediction only ;}	{NA}	{NA}	{NA}	{NA}	{NA}	{ARO:3002679, ARO:3003110, ARO:3002842, ARO:3003987, ARO:3003744, ARO:3002681, ARO:3002841, ARO:3002845, ARO:3002843, ARO:3002676, ARO:3002680, ARO:3002840, ARO:3002670, ARO:3002844, ARO:3002675, ARO:3002678; catB7, catB10, vatC, VatI, vatF, catB9, vatB, vatH, vatD, catB3, catB8, vatA, cat, vatE, catB2, catB6 133.265, 123.25, 202.601, 202.986, 229.18, 137.117, 217.624, 209.92, 194.897, 125.176, 1…	{NA}	{false}	{NA}	{NA}
MAR44G.1_GM000494	{Scaffold1:543293:543409:+}	{NA}	{NA}	{NA}	{NA}	{NA}	{NA}	{NA}	{NA}	{NA}	{NA}	{NA}	{false}	{NA}	{NA}
MAR44G.1_GM000495	{Scaffold1:543496:545322:-}	{WP_235812855.1; membrane protein insertase YidC [Roseibium alexandrii]}	{B1Z8E7; Membrane protein insertase YidC }	{labp:FJ695_00475; K03217 yidC, spoIIIJ, OXA1, ccfA YidC/Oxa1 family membrane protein insertase -- Genetic Information Processing; Folding, sorting and degradation; Protein export [PATH:ko03060] Environmental Information Processing; Membrane transport; Bacterial secretion system [PATH:ko03070] Cellular Processes; Cellular community - prokaryotes; Quorum sensing [PATH:ko02024]}	{WP.077293182.1; COG0706 Membrane protein insertase Oxa1/YidC/SpoIIIJ M Cell wall/membrane/envelope biogenesis ;}	{NA}	{GO:0051205; protein insertion into membrane; biological_process GO:0016021; integral to membrane; cellular_component}	{NA}	{NA}	{NA}	{NA}	{NA}	{false}	{NA}	{PF02096:60Kd inner membrane protein}
MAR44G.1_GM000496	{Scaffold1:545319:545765:-}	{WP_008193124.1; ribonuclease P protein component [Roseibium alexandrii]}	{Q98D89; Ribonuclease P protein component }	{labp:FJ695_00470; K03536 rnpA ribonuclease P protein component 3.1.26.5 --}	{WP.023002254.1; COG0594 RNase P protein component J Translation, ribosomal structure and biogenesis ;}	{NA}	{GO:0000049; tRNA binding; molecular_function GO:0008033; tRNA processing; biological_process GO:0004526; ribonuclease P activity; molecular_function}	{NA}	{NA}	{NA}	{NA}	{NA}	{false}	{NA}	{PF00825:Ribonuclease P}
MAR44G.1_GM000497	{Scaffold1:546264:547073:+}	{CTQ65097.1; TVP38/TMEM64 family inner membrane protein YdjZ [Roseibium alexandrii]}	{NA}	{NA}	{WP.077290845.1; COG0398 Uncharacterized membrane protein YdjX, related to fungal oxalate transporter, TVP38/TMEM64 family S Function unknown ;}	{NA}	{NA}	{NA}	{NA}	{NA}	{NA}	{NA}	{false}	{NA}	{NA}
MAR44G.1_GM000498	{Scaffold1:547117:548547:+}	{WP_055670457.1; FAD-dependent oxidoreductase [Roseibium alexandrii]}	{NA}	{NA}	{WP.077290844.1; COG1249 Dihydrolipoamide dehydrogenase (E3) component of pyruvate/2-oxoglutarate dehydrogenase complex or glutathione oxidoreductase C Energy production and conversion ;}	{NA}	{GO:0016117; carotenoid biosynthetic process; biological_process GO:0006631; fatty acid metabolic process; biological_process GO:0043115; precorrin-2 dehydrogenase activity; molecular_function GO:0016491; oxidoreductase activity; molecular_function GO:0048037; cofactor binding; molecular_function GO:0045454; cell redox homeostasis; biological_process GO:0055114; oxidation-reduction process; biolo…	{NA}	{NA}	{NA}	{NA}	{NA}	{false}	{NA}	{PF02852:Pyridine nucleotide-disulphide oxidoreductase, dimerisation domain PF05834:Lycopene cyclase protein PF07992:Pyridine nucleotide-disulphide oxidoreductase PF01266:FAD dependent oxidoreductase PF01134:Glucose inhibited division protein A PF03721:UDP-glucose/GDP-mannose dehydrogenase family, NAD binding domain PF00070:Pyridine nucleotide-disulphide oxidoreductase PF02826:D-isomer specific 2…
MAR44G.1_GM000499	{Scaffold1:548598:550079:+}	{WP_055670456.1; HAMP domain-containing sensor histidine kinase [Roseibium alexandrii]}	{NA}	{NA}	{WP.023002251.1; COG0642 Signal transduction histidine kinase T Signal transduction mechanisms ;}	{NA}	{GO:0000155; two-component sensor activity; molecular_function GO:0016021; integral to membrane; cellular_component GO:0016020; membrane; cellular_component GO:0007165; signal transduction; biological_process GO:0004871; signal transducer activity; molecular_function GO:0005524; ATP binding; molecular_function}	{PHI:4524; Q8YF74 RegM 29459 Brucella melitensis infertility; spontaneous abortion Mus musculus (related: house mouse) encoding a sensory transduction protein kinase Gene deletion: partial; gene complementation unaffected pathogenicity}	{NA}	{NA}	{NA}	{NA}	{false}	{NA}	{PF00512:His Kinase A (phospho-acceptor) domain PF00672:HAMP domain PF02518:Histidine kinase-, DNA gyrase B-, and HSP90-like ATPase}
MAR44G.1_GM000500	{Scaffold1:550834:550974:+}	{NA}	{NA}	{NA}	{NA}	{NA}	{NA}	{NA}	{NA}	{NA}	{NA}	{NA}	{false}	{NA}	{NA}
MAR44G.1_GM000501	{Scaffold1:551154:553217:+}	{WP_168206219.1; type II secretion system secretin GspD [Labrenzia sp. PHM005]}	{NA}	{labp:FJ695_00200; K02453 gspD general secretion pathway protein D -- Environmental Information Processing; Membrane transport; Bacterial secretion system [PATH:ko03070] Cellular Processes; Cellular community - prokaryotes; Biofilm formation - Vibrio cholerae [PATH:ko05111]}	{WP.117414381.1; COG1450 Type II secretory pathway component GspD/PulD (secretin) U Intracellular trafficking, secretion, and vesicular transport ;}	{NA}	{GO:0009306; protein secretion; biological_process}	{NA}	{NA}	{NA}	{NA}	{NA}	{true}	{NA}	{PF00263:Bacterial type II and III secretion system protein}
MAR44G.1_GM000502	{Scaffold1:553514:559567:+}	{WP_141183566.1; FG-GAP-like repeat-containing protein [Labrenzia sp. PHM005]}	{NA}	{NA}	{NA}	{NA}	{GO:0005509; calcium ion binding; molecular_function}	{NA}	{NA}	{NA}	{NA}	{NA}	{false}	{NA}	{PF00353:Haemolysin-type calcium-binding repeat (2 copies)}
MAR44G.1_GM000503	{Scaffold1:559558:561717:+}	{QDG74417.1; hypothetical protein FJ695_00190 [Labrenzia sp. PHM005]}	{NA}	{NA}	{NA}	{NA}	{NA}	{NA}	{NA}	{NA}	{NA}	{YES}	{false}	{NA}	{NA}
MAR44G.1_GM000504	{Scaffold1:561722:562288:+}	{NA}	{NA}	{NA}	{NA}	{NA}	{NA}	{NA}	{NA}	{NA}	{NA}	{NA}	{false}	{NA}	{NA}
MAR44G.1_GM000505	{Scaffold1:562454:563305:-}	{WP_168206217.1; hypothetical protein [Labrenzia sp. PHM005]}	{NA}	{NA}	{NA}	{NA}	{NA}	{NA}	{NA}	{NA}	{NA}	{NA}	{false}	{NA}	{NA}
MAR44G.1_GM000506	{Scaffold1:563298:563840:+}	{QDG74408.1; prepilin peptidase [Labrenzia sp. PHM005]}	{NA}	{labp:FJ695_00145; K02654 pilD, pppA leader peptidase (prepilin peptidase) / N-methyltransferase [EC:3.4.23.43 2.1.1.-] 3.4.23.43,2.1.1.- --}	{NA}	{NA}	{GO:0004190; aspartic-type endopeptidase activity; molecular_function GO:0016020; membrane; cellular_component}	{NA}	{NA}	{NA}	{NA}	{NA}	{false}	{NA}	{PF01478:Type IV leader peptidase family}
MAR44G.1_GM000507	{Scaffold1:563857:564303:+}	{WP_141183556.1; type II secretion system major pseudopilin GspG [Labrenzia sp. PHM005]}	{Q00514; Type II secretion system core protein G }	{labp:FJ695_00140; K02456 gspG general secretion pathway protein G -- Environmental Information Processing; Membrane transport; Bacterial secretion system [PATH:ko03070] Cellular Processes; Cellular community - prokaryotes; Biofilm formation - Vibrio cholerae [PATH:ko05111]}	{WP.117414380.1; COG2165 Type II secretory pathway, pseudopilin PulG NUW Cell motility ; Intracellular trafficking, secretion, and vesicular transport ; Extracellular structures ;}	{NA}	{NA}	{NA}	{VFG040979; VF1296 Gsp (VF1296) - Effector delivery system gspG type II secretion system major pseudopilin GspG - - - -}	{NA}	{NA}	{NA}	{false}	{NA}	{NA}
MAR44G.1_GM000508	{Scaffold1:564368:564916:-}	{WP_141183555.1; prepilin-type N-terminal cleavage/methylation domain-containing protein [Labrenzia sp. PHM005]}	{NA}	{NA}	{NA}	{NA}	{NA}	{NA}	{NA}	{NA}	{NA}	{NA}	{false}	{NA}	{NA}
MAR44G.1_GM000509	{Scaffold1:564913:565305:-}	{WP_141183554.1; type II secretion system protein [Labrenzia sp. PHM005]}	{NA}	{NA}	{NA}	{NA}	{NA}	{NA}	{NA}	{NA}	{NA}	{NA}	{false}	{NA}	{NA}
MAR44G.1_GM000510	{Scaffold1:565292:566509:-}	{QDG74404.1; type II secretion system F family protein [Labrenzia sp. PHM005]}	{NA}	{labp:FJ695_00125; K02455 gspF general secretion pathway protein F -- Environmental Information Processing; Membrane transport; Bacterial secretion system [PATH:ko03070] Cellular Processes; Cellular community - prokaryotes; Biofilm formation - Vibrio cholerae [PATH:ko05111]}	{NA}	{NA}	{NA}	{NA}	{NA}	{NA}	{NA}	{NA}	{false}	{NA}	{NA}
MAR44G.1_GM000511	{Scaffold1:566529:568184:-}	{WP_141183552.1; GspE/PulE family protein [Labrenzia sp. PHM005]}	{Q9I5N9; Type II secretion system protein HxcR }	{NA}	{WP.117411162.1; COG2804 Type II secretory pathway ATPase GspE/PulE or T4P pilus assembly pathway ATPase PilB NUW Cell motility ; Intracellular trafficking, secretion, and vesicular transport ; Extracellular structures ;}	{NA}	{GO:0006810; transport; biological_process GO:0005525; GTP binding; molecular_function GO:0005524; ATP binding; molecular_function GO:0016887; ATPase activity; molecular_function GO:0006614; SRP-dependent cotranslational protein targeting to membrane; biological_process GO:0016301; kinase activity; molecular_function}	{NA}	{VFG040878; VF0945 Hxc (VF0945) - Effector delivery system PA0686 type II secretion system protein HxcR - - - -}	{NA}	{NA}	{NA}	{false}	{NA}	{PF06414:Zeta toxin PF00448:SRP54-type protein, GTPase domain PF00005:ABC transporter PF00437:Type II/IV secretion system protein PF05157:Type II secretion system (T2SS), protein E, N-terminal domain PF01637:ATPase domain predominantly from Archaea}
MAR44G.1_GM000512	{Scaffold1:568276:569349:+}	{QDG79381.1; PilN domain-containing protein [Labrenzia sp. PHM005]}	{NA}	{labp:FJ695_00115; K02461 gspL general secretion pathway protein L -- Environmental Information Processing; Membrane transport; Bacterial secretion system [PATH:ko03070] Cellular Processes; Cellular community - prokaryotes; Biofilm formation - Vibrio cholerae [PATH:ko05111]}	{NA}	{NA}	{NA}	{NA}	{NA}	{NA}	{NA}	{NA}	{false}	{NA}	{NA}
MAR44G.1_GM000513	{Scaffold1:569358:569921:+}	{WP_168206509.1; type II secretion system protein GspM [Labrenzia sp. PHM005]}	{NA}	{NA}	{NA}	{NA}	{GO:0006858; extracellular transport; biological_process}	{NA}	{NA}	{NA}	{NA}	{NA}	{false}	{NA}	{PF10741:Type II secretion system (T2SS), protein M subtype b}
MAR44G.1_GM000514	{Scaffold1:569918:570568:+}	{WP_168206508.1; hypothetical protein [Labrenzia sp. PHM005]}	{NA}	{NA}	{NA}	{NA}	{GO:0005634; nucleus; cellular_component GO:0005737; cytoplasm; cellular_component GO:0003723; RNA binding; molecular_function GO:0006397; mRNA processing; biological_process}	{NA}	{NA}	{NA}	{NA}	{NA}	{false}	{NA}	{PF06003:Survival motor neuron protein (SMN)}
MAR44G.1_GM000515	{Scaffold1:570901:571431:-}	{WP_162559568.1; hypothetical protein [Tritonibacter mobilis]}	{NA}	{NA}	{NA}	{NA}	{NA}	{NA}	{NA}	{NA}	{NA}	{NA}	{false}	{NA}	{NA}
MAR44G.1_GM000516	{Scaffold1:571622:572998:-}	{WP_055670425.1; sigma-54 dependent transcriptional regulator [Roseibium alexandrii]}	{Q9APD9; Transcriptional regulatory protein ZraR }	{NA}	{WP.058899047.1; COG2204 DNA-binding transcriptional response regulator, NtrC family, contains REC, AAA-type ATPase, and a Fis-type DNA-binding domains T Signal transduction mechanisms ;}	{NA}	{GO:0006355; regulation of transcription, DNA-dependent; biological_process GO:0005524; ATP binding; molecular_function GO:0043565; sequence-specific DNA binding; molecular_function GO:0000160; two-component signal transduction system (phosphorelay); biological_process GO:0016887; ATPase activity; molecular_function GO:0003700; sequence-specific DNA binding transcription factor activity; molecula…	{PHI:12169; Q8P9D2 fleQ 339 Xanthomonas campestris black rot Brassica oleracea (no common name found) Transcriptional regulator Gene deletion: full; gene complementation loss of pathogenicity}	{NA}	{NA}	{NA}	{NA}	{false}	{NA}	{PF00126:Bacterial regulatory helix-turn-helix protein, lysR family PF00072:Response regulator receiver domain PF05225:helix-turn-helix, Psq domain PF02954:Bacterial regulatory protein, Fis family PF00158:Sigma-54 interaction domain PF07726:ATPase family associated with various cellular activities (AAA) PF00004:ATPase family associated with various cellular activities (AAA) PF07728:AAA domain (dy…
MAR44G.1_GM000517	{Scaffold1:572991:574409:-}	{WP_055670424.1; HAMP domain-containing sensor histidine kinase [Roseibium alexandrii]}	{NA}	{NA}	{NA}	{NA}	{GO:0007165; signal transduction; biological_process GO:0004871; signal transducer activity; molecular_function GO:0005524; ATP binding; molecular_function GO:0000155; two-component sensor activity; molecular_function GO:0016021; integral to membrane; cellular_component GO:0016020; membrane; cellular_component}	{NA}	{NA}	{NA}	{NA}	{NA}	{false}	{NA}	{PF00672:HAMP domain PF02518:Histidine kinase-, DNA gyrase B-, and HSP90-like ATPase PF00512:His Kinase A (phospho-acceptor) domain}
MAR44G.1_GM000518	{Scaffold1:574610:575887:-}	{WP_008195600.1; monovalent cation/H(+) antiporter subunit G [Roseibium alexandrii]}	{NA}	{NA}	{NA}	{NA}	{GO:0005451; monovalent cation:hydrogen antiporter activity; molecular_function GO:0015672; monovalent inorganic cation transport; biological_process GO:0015992; proton transport; biological_process}	{NA}	{NA}	{NA}	{NA}	{NA}	{false}	{NA}	{PF03334:Na+/H+ antiporter subunit}
MAR44G.1_GM000519	{Scaffold1:575887:576243:-}	{WP_081450551.1; monovalent cation/H+ antiporter complex subunit F [Roseibium alexandrii]}	{Q52965; PhaF2 protein }	{aala:IGS74_10895; K05570 mnhF, mrpF multicomponent Na+:H+ antiporter subunit F -- --}	{WP.019461397.1; COG2212 Multisubunit Na+/H+ antiporter, MnhF subunit P Inorganic ion transport and metabolism ;}	{NA}	{GO:0015075; ion transmembrane transporter activity; molecular_function GO:0016021; integral to membrane; cellular_component GO:0003824; NA GO:0008152; NA GO:0034220; ion transmembrane transport; biological_process}	{NA}	{NA}	{NA}	{NA}	{NA}	{false}	{NA}	{PF02515:CoA-transferase family III PF04066:Multiple resistance and pH regulation protein F (MrpF / PhaF)}
MAR44G.1_GM000520	{Scaffold1:576240:576620:-}	{WP_235812854.1; Na+/H+ antiporter subunit E [Roseibium alexandrii]}	{Q9RGZ1; Na(+)/H(+) antiporter subunit E }	{rros:D4A92_10880; K05569 mnhE, mrpE multicomponent Na+:H+ antiporter subunit E -- --}	{WP.058899050.1; COG1863 Multisubunit Na+/H+ antiporter, MnhE subunit P Inorganic ion transport and metabolism ;}	{gnl|TC-DB|Q9KD99; 2.A.63.1.2 Na+/H+ antiporter OS=Bacillus halodurans GN=BH1315 PE=4 SV=1}	{GO:0016021; integral to membrane; cellular_component GO:0006812; cation transport; biological_process GO:0008324; cation transmembrane transporter activity; molecular_function}	{NA}	{NA}	{NA}	{NA}	{NA}	{false}	{NA}	{PF01899:Na+/H+ ion antiporter subunit}
MAR44G.1_GM000521	{Scaffold1:576617:578158:-}	{WP_008193634.1; Na+/H+ antiporter subunit D [Roseibium alexandrii]}	{Q9RGZ2; Na(+)/H(+) antiporter subunit D }	{psr:PSTAA_4362; K05568 mnhD, mrpD multicomponent Na+:H+ antiporter subunit D -- --}	{WP.011915205.1; COG0651 Formate hydrogenlyase subunit 3/Multisubunit Na+/H+ antiporter, MnhD subunit CP Energy production and conversion ; Inorganic ion transport and metabolism ;}	{gnl|TC-DB|Q9KD98; 2.A.63.1.2 Na+/H+ antiporter OS=Bacillus halodurans GN=BH1316 PE=3 SV=1}	{GO:0055114; oxidation-reduction process; biological_process GO:0008137; NADH dehydrogenase (ubiquinone) activity; molecular_function}	{NA}	{NA}	{NA}	{NA}	{NA}	{false}	{NA}	{PF00361:Proton-conducting membrane transporter}
MAR44G.1_GM000522	{Scaffold1:578164:578553:-}	{WP_055670422.1; NADH-quinone oxidoreductase subunit K [Roseibium alexandrii]}	{Q5HQL2; Na(+)/H(+) antiporter subunit C1 }	{abaw:D5400_06260; K05567 mnhC, mrpC multicomponent Na+:H+ antiporter subunit C -- --}	{WP.050473097.1; COG1006 Multisubunit Na+/H+ antiporter, MnhC subunit P Inorganic ion transport and metabolism ;}	{gnl|TC-DB|P60682; 2.A.63.1.3 Na(+)/H(+) antiporter subunit C - Staphylococcus aureus.}	{GO:0042773; ATP synthesis coupled electron transport; biological_process GO:0016651; oxidoreductase activity, acting on NADH or NADPH; molecular_function GO:0055114; oxidation-reduction process; biological_process}	{NA}	{NA}	{NA}	{NA}	{NA}	{false}	{NA}	{PF00420:NADH-ubiquinone/plastoquinone oxidoreductase chain 4L}
MAR44G.1_GM000523	{Scaffold1:578550:581471:-}	{WP_208981106.1; proton-conducting transporter membrane subunit [Roseibium alexandrii]}	{NA}	{rmuc:FOB66_19740; K05565 mnhA, mrpA multicomponent Na+:H+ antiporter subunit A -- --}	{WP.075799509.1; COG2111 Multisubunit Na+/H+ antiporter, MnhB subunit P Inorganic ion transport and metabolism ;}	{NA}	{GO:0055114; oxidation-reduction process; biological_process GO:0008137; NADH dehydrogenase (ubiquinone) activity; molecular_function GO:0042773; ATP synthesis coupled electron transport; biological_process}	{NA}	{NA}	{NA}	{NA}	{NA}	{false}	{NA}	{PF00361:Proton-conducting membrane transporter PF00662:NADH-Ubiquinone oxidoreductase (complex I), chain 5 N-terminus}
MAR44G.1_GM000524	{Scaffold1:581674:581922:-}	{CTQ64971.1; hypothetical protein LAX5112_00465 [Roseibium alexandrii]}	{NA}	{NA}	{NA}	{NA}	{NA}	{NA}	{NA}	{NA}	{NA}	{NA}	{false}	{NA}	{NA}
MAR44G.1_GM000525	{Scaffold1:582757:583554:+}	{WP_055670420.1; DUF4198 domain-containing protein [Roseibium alexandrii]}	{NA}	{labr:CHH27_23040; K10094 cbiK nickel transport protein -- Environmental Information Processing; Membrane transport; ABC transporters [PATH:ko02010]}	{WP.076696642.1; COG5266 Uncharacterized protein, contains GH25 family domain R General function prediction only ;}	{NA}	{GO:0003824; NA GO:0008199; ferric iron binding; molecular_function GO:0055114; oxidation-reduction process; biological_process GO:0006725; cellular aromatic compound metabolic process; biological_process}	{NA}	{NA}	{NA}	{NA}	{NA}	{false}	{NA}	{PF00775:Dioxygenase}
MAR44G.1_GM000526	{Scaffold1:583579:584205:+}	{WP_055670419.1; cobalt transporter CbiM [Roseibium alexandrii]}	{P44274; Putative metal transport protein HI_1621 }	{labr:CHH27_23045; K02007 cbiM cobalt/nickel transport system permease protein -- Environmental Information Processing; Membrane transport; ABC transporters [PATH:ko02010]}	{WP.042460984.1; COG0310 ABC-type Co2+ transport system, permease component P Inorganic ion transport and metabolism ;}	{gnl|TC-DB|ACN15415; 3.A.1.22.2 CbiM [Desulfobacterium autotrophicum HRM2]}	{GO:0016021; integral to membrane; cellular_component GO:0000041; transition metal ion transport; biological_process}	{NA}	{NA}	{NA}	{NA}	{NA}	{false}	{NA}	{PF01891:Cobalt uptake substrate-specific transmembrane region}
MAR44G.1_GM000527	{Scaffold1:584202:584843:+}	{WP_055670418.1; hypothetical protein [Roseibium alexandrii]}	{NA}	{labr:CHH27_23050; K16915 cbiL nickel transport protein -- Environmental Information Processing; Membrane transport; ABC transporters [PATH:ko02010]}	{NA}	{NA}	{NA}	{NA}	{NA}	{NA}	{NA}	{NA}	{false}	{NA}	{NA}
MAR44G.1_GM000528	{Scaffold1:584847:585644:+}	{WP_055670417.1; cobalt ECF transporter T component CbiQ [Roseibium alexandrii]}	{NA}	{labr:CHH27_23055; K02008 cbiQ cobalt/nickel transport system permease protein -- Environmental Information Processing; Membrane transport; ABC transporters [PATH:ko02010]}	{WP.100930542.1; COG0619 ECF-type transporter transmembrane protein EcfT H Coenzyme transport and metabolism ;}	{NA}	{NA}	{NA}	{NA}	{NA}	{NA}	{NA}	{true}	{NA}	{NA}
MAR44G.1_GM000529	{Scaffold1:585631:586284:+}	{WP_055670416.1; ABC transporter ATP-binding protein [Roseibium alexandrii]}	{Q57CD8; Putative ABC transporter ATP-binding protein BruAb1_1365 }	{labr:CHH27_23060; K02006 cbiO cobalt/nickel transport system ATP-binding protein -- Environmental Information Processing; Membrane transport; ABC transporters [PATH:ko02010]}	{WP.076696633.1; COG1122 Energy-coupling factor transporter ATP-binding protein EcfA2 PR Inorganic ion transport and metabolism ; General function prediction only ;}	{gnl|TC-DB|ACN15418; 3.A.1.22.2 CbiO1 [Desulfobacterium autotrophicum HRM2]}	{GO:0005525; GTP binding; molecular_function GO:0098519; NA GO:0005524; ATP binding; molecular_function GO:0070526; threonylcarbamoyladenosine biosynthetic process; biological_process GO:0003924; GTPase activity; molecular_function GO:0016887; ATPase activity; molecular_function}	{NA}	{NA}	{NA}	{NA}	{NA}	{false}	{NA}	{PF03193:Protein of unknown function, DUF258 PF01926:50S ribosome-binding GTPase PF00005:ABC transporter PF03266:NTPase PF02367:Threonylcarbamoyl adenosine biosynthesis protein TsaE}
MAR44G.1_GM000530	{Scaffold1:586302:587774:-}	{WP_055670415.1; aldo/keto reductase [Roseibium alexandrii]}	{NA}	{NA}	{WP.058900941.1; COG0667 Pyridoxal reductase PdxI or related oxidoreductase, aldo/keto reductase family HR Coenzyme transport and metabolism ; General function prediction only ;}	{NA}	{NA}	{NA}	{NA}	{NA}	{NA}	{NA}	{false}	{NA}	{NA}
MAR44G.1_GM000531	{Scaffold1:587786:588436:-}	{WP_055670546.1; GntR family transcriptional regulator [Roseibium alexandrii]}	{NA}	{NA}	{WP.058901127.1; COG1802 DNA-binding transcriptional regulator, GntR family K Transcription ;}	{NA}	{GO:0003700; sequence-specific DNA binding transcription factor activity; molecular_function GO:0003677; DNA binding; molecular_function GO:0006355; regulation of transcription, DNA-dependent; biological_process}	{NA}	{NA}	{NA}	{NA}	{NA}	{false}	{NA}	{PF09339:IclR helix-turn-helix domain PF00392:Bacterial regulatory proteins, gntR family}
MAR44G.1_GM000532	{Scaffold1:588549:588959:+}	{WP_055670545.1; TIGR04076 family protein [Roseibium alexandrii]}	{NA}	{NA}	{NA}	{NA}	{NA}	{NA}	{NA}	{NA}	{NA}	{NA}	{false}	{NA}	{NA}
MAR44G.1_GM000533	{Scaffold1:588956:590038:+}	{WP_055670414.1; aldo/keto reductase [Roseibium alexandrii]}	{NA}	{NA}	{WP.058900943.1; COG0667 Pyridoxal reductase PdxI or related oxidoreductase, aldo/keto reductase family HR Coenzyme transport and metabolism ; General function prediction only ;}	{NA}	{NA}	{NA}	{NA}	{NA}	{NA}	{NA}	{false}	{NA}	{NA}
MAR44G.1_GM000534	{Scaffold1:590031:590804:+}	{WP_055670413.1; ABC transporter ATP-binding protein [Roseibium alexandrii]}	{Q58663; Probable branched-chain amino acid transport ATP-binding protein LivG }	{labp:FJ695_25255; K01995 livG branched-chain amino acid transport system ATP-binding protein -- Environmental Information Processing; Membrane transport; ABC transporters [PATH:ko02010] Cellular Processes; Cellular community - prokaryotes; Quorum sensing [PATH:ko02024]}	{WP.099052175.1; COG0411 ABC-type branched-chain amino acid transport system, ATPase component LivG E Amino acid transport and metabolism ;}	{gnl|TC-DB|Q55164; 3.A.1.4.2 HIGH-AFFINITY BRANCHED-CHAIN AMINO ACID TRANSPORT ATP-BINDING PROTEIN - Synechocystis sp. (strain PCC 6803).}	{GO:0016887; ATPase activity; molecular_function GO:0003924; GTPase activity; molecular_function GO:0016301; kinase activity; molecular_function GO:0005525; GTP binding; molecular_function GO:0005524; ATP binding; molecular_function}	{NA}	{NA}	{NA}	{NA}	{NA}	{false}	{NA}	{PF06414:Zeta toxin PF01926:50S ribosome-binding GTPase PF00005:ABC transporter PF03193:Protein of unknown function, DUF258}
MAR44G.1_GM000535	{Scaffold1:590797:591525:+}	{WP_040451460.1; ABC transporter ATP-binding protein [Roseibium alexandrii]}	{O28882; Probable branched-chain amino acid transport ATP-binding protein LivF }	{labp:FJ695_25250; K01996 livF branched-chain amino acid transport system ATP-binding protein -- Environmental Information Processing; Membrane transport; ABC transporters [PATH:ko02010] Cellular Processes; Cellular community - prokaryotes; Quorum sensing [PATH:ko02024]}	{WP.058900944.1; COG0410 ABC-type branched-chain amino acid transport system, ATPase component LivF E Amino acid transport and metabolism ;}	{gnl|TC-DB|P73650; 3.A.1.4.2 HIGH-AFFINITY BRANCHED-CHAIN AMINO ACID TRANSPORT ATP-BINDING PROTEIN BRAG - Synechocystis sp. (strain PCC 6803).}	{GO:0015979; photosynthesis; biological_process GO:0016851; magnesium chelatase activity; molecular_function GO:0003924; GTPase activity; molecular_function GO:0019083; viral transcription; biological_process GO:0015995; chlorophyll biosynthetic process; biological_process GO:0005515; protein binding; molecular_function GO:0016887; ATPase activity; molecular_function GO:0016301; kinase activity; …	{NA}	{NA}	{NA}	{NA}	{NA}	{false}	{NA}	{PF00004:ATPase family associated with various cellular activities (AAA) PF01926:50S ribosome-binding GTPase PF00005:ABC transporter PF00625:Guanylate kinase PF06414:Zeta toxin PF01078:Magnesium chelatase, subunit ChlI PF01637:ATPase domain predominantly from Archaea PF00350:Dynamin family PF02456:Adenovirus IVa2 protein PF03193:Protein of unknown function, DUF258}
MAR44G.1_GM000536	{Scaffold1:591522:592436:+}	{WP_055670411.1; branched-chain amino acid ABC transporter permease [Roseibium alexandrii]}	{NA}	{labp:FJ695_25245; K01997 livH branched-chain amino acid transport system permease protein -- Environmental Information Processing; Membrane transport; ABC transporters [PATH:ko02010] Cellular Processes; Cellular community - prokaryotes; Quorum sensing [PATH:ko02024]}	{WP.012178649.1; COG0559 Branched-chain amino acid ABC-type transport system, permease component E Amino acid transport and metabolism ;}	{NA}	{GO:0006810; transport; biological_process GO:0016020; membrane; cellular_component GO:0005215; NA}	{NA}	{NA}	{NA}	{NA}	{NA}	{false}	{NA}	{PF02653:Branched-chain amino acid transport system / permease component}
MAR44G.1_GM000537	{Scaffold1:592433:593413:+}	{WP_008193854.1; branched-chain amino acid ABC transporter permease [Roseibium alexandrii]}	{NA}	{labp:FJ695_25240; K01998 livM branched-chain amino acid transport system permease protein -- Environmental Information Processing; Membrane transport; ABC transporters [PATH:ko02010] Cellular Processes; Cellular community - prokaryotes; Quorum sensing [PATH:ko02024]}	{WP.058900946.1; COG4177 ABC-type branched-chain amino acid transport system, permease component E Amino acid transport and metabolism ;}	{NA}	{GO:0006810; transport; biological_process GO:0005215; NA GO:0016020; membrane; cellular_component}	{NA}	{NA}	{NA}	{NA}	{NA}	{false}	{NA}	{PF02653:Branched-chain amino acid transport system / permease component}
MAR44G.1_GM000538	{Scaffold1:593410:594666:+}	{WP_008191549.1; ABC transporter substrate-binding protein [Roseibium alexandrii]}	{NA}	{labp:FJ695_25235; K01999 livK branched-chain amino acid transport system substrate-binding protein -- Environmental Information Processing; Membrane transport; ABC transporters [PATH:ko02010] Cellular Processes; Cellular community - prokaryotes; Quorum sensing [PATH:ko02024]}	{WP.012178647.1; COG0683 ABC-type branched-chain amino acid transport system, periplasmic component E Amino acid transport and metabolism ;}	{NA}	{NA}	{NA}	{NA}	{NA}	{NA}	{YES}	{false}	{NA}	{NA}
MAR44G.1_GM000539	{Scaffold1:594736:596109:-}	{WP_040451462.1; aspartate aminotransferase family protein [Roseibium alexandrii]}	{E1V7V7; Diaminobutyrate--2-oxoglutarate transaminase }	{labp:FJ695_10290; K15785 doeD L-2,4-diaminobutyrate transaminase 2.6.1.76 Metabolism; Amino acid metabolism; Glycine, serine and threonine metabolism [PATH:ko00260]}	{WP.099556108.1; COG0161 Adenosylmethionine-8-amino-7-oxononanoate aminotransferase H Coenzyme transport and metabolism ;}	{NA}	{GO:0008483; transaminase activity; molecular_function GO:0030170; pyridoxal phosphate binding; molecular_function}	{NA}	{NA}	{NA}	{ARO:3000024; patA 142.895 efflux pump complex or subunit conferring antibiotic resistance }	{NA}	{false}	{NA}	{PF00202:Aminotransferase class-III}
MAR44G.1_GM000540	{Scaffold1:596134:597615:-}	{WP_055670408.1; NAD-dependent succinate-semialdehyde dehydrogenase [Roseibium alexandrii]}	{E1V7V8; Aspartate-semialdehyde dehydrogenase (Non-phosphorylating) }	{labp:FJ695_10285; K15786 doeC aspartate-semialdehyde dehydrogenase 1.2.1.- Metabolism; Amino acid metabolism; Glycine, serine and threonine metabolism [PATH:ko00260]}	{WP.099556107.1; COG1012 Acyl-CoA reductase or other NAD-dependent aldehyde dehydrogenase I Lipid transport and metabolism ;}	{NA}	{GO:0055114; oxidation-reduction process; biological_process GO:0016491; oxidoreductase activity; molecular_function GO:0008152; NA}	{PHI:3914; Q0V515 Sdh1 13684 Parastagonospora nodorum stagonospora nodorum blotch Triticum aestivum (related: bread wheat) encodes succinic semialdehyde dehydrogenase Gene disruption; gene complementation reduced virulence}	{NA}	{NA}	{NA}	{NA}	{false}	{NA}	{PF00171:Aldehyde dehydrogenase family}
MAR44G.1_GM000541	{Scaffold1:597700:598212:-}	{WP_144432024.1; Lrp/AsnC family transcriptional regulator [Roseibium alexandrii]}	{E1V7V9; Transcriptional regulatory protein DoeX }	{labp:FJ695_10280; K15782 doeX Lrp/AsnC family transcriptional regulator, regulator of ectoine-degradation genes -- --}	{WP.113155072.1; COG1522 DNA-binding transcriptional regulator, Lrp family K Transcription ;}	{NA}	{GO:0006508; proteolysis; biological_process GO:0006355; regulation of transcription, DNA-dependent; biological_process GO:0000062; fatty-acyl-CoA binding; molecular_function GO:0043565; sequence-specific DNA binding; molecular_function GO:0005622; intracellular; cellular_component GO:0004252; serine-type endopeptidase activity; molecular_function GO:0003700; sequence-specific DNA binding transcr…	{NA}	{NA}	{NA}	{NA}	{NA}	{false}	{NA}	{PF09339:IclR helix-turn-helix domain PF01047:MarR family PF00392:Bacterial regulatory proteins, gntR family PF01022:Bacterial regulatory protein, arsR family PF07840:FadR C-terminal domain PF01726:LexA DNA binding domain PF13404:AsnC-type helix-turn-helix domain PF00126:Bacterial regulatory helix-turn-helix protein, lysR family PF04218:CENP-B N-terminal DNA-binding domain PF02954:Bacterial regul…
MAR44G.1_GM000542	{Scaffold1:598276:599664:+}	{WP_055670407.1; PLP-dependent aminotransferase family protein [Roseibium alexandrii]}	{NA}	{NA}	{WP.026173195.1; COG1167 DNA-binding transcriptional regulator, MocR family, contains an aminotransferase domain KE Transcription ; Amino acid transport and metabolism ;}	{NA}	{GO:0030170; pyridoxal phosphate binding; molecular_function GO:0006355; regulation of transcription, DNA-dependent; biological_process GO:0003700; sequence-specific DNA binding transcription factor activity; molecular_function GO:0009058; biosynthetic process; biological_process}	{NA}	{NA}	{NA}	{NA}	{NA}	{false}	{NA}	{PF00155:Aminotransferase class I and II PF00392:Bacterial regulatory proteins, gntR family}
MAR44G.1_GM000543	{Scaffold1:599815:600819:+}	{WP_040451466.1; hydroxyectoine utilization dehydratase EutB [Roseibium alexandrii]}	{P55664; Putative threonine dehydratase }	{labp:FJ695_10270; K01754 E4.3.1.19, ilvA, tdcB threonine dehydratase 4.3.1.19 Metabolism; Amino acid metabolism; Glycine, serine and threonine metabolism [PATH:ko00260] Metabolism; Amino acid metabolism; Valine, leucine and isoleucine biosynthesis [PATH:ko00290]}	{WP.018063141.1; COG1171 Threonine deaminase E Amino acid transport and metabolism ;}	{NA}	{NA}	{NA}	{NA}	{NA}	{NA}	{NA}	{false}	{NA}	{NA}
MAR44G.1_GM000544	{Scaffold1:600823:601815:+}	{WP_008190865.1; cyclodeaminase [Roseibium alexandrii]}	{P58338; Putative dehydrogenase RB0419 }	{NA}	{WP.018063142.1; COG2423 Ornithine cyclodeaminase/archaeal alanine dehydrogenase, mu-crystallin family E Amino acid transport and metabolism ;}	{NA}	{GO:0003824; NA GO:0009396; folic acid-containing compound biosynthetic process; biological_process GO:0004488; methylenetetrahydrofolate dehydrogenase (NADP+) activity; molecular_function GO:0055114; oxidation-reduction process; biological_process}	{NA}	{NA}	{NA}	{NA}	{NA}	{false}	{NA}	{PF02882:Tetrahydrofolate dehydrogenase/cyclohydrolase, NAD(P)-binding domain}
MAR44G.1_GM000545	{Scaffold1:601834:603021:+}	{CTQ64912.1; Xaa-Pro dipeptidase [Roseibium alexandrii]}	{E1V7W1; Ectoine hydrolase }	{labp:FJ695_10260; K15783 doeA ectoine hydrolase 3.5.4.44 Metabolism; Amino acid metabolism; Glycine, serine and threonine metabolism [PATH:ko00260]}	{WP.011046887.1; COG0006 Xaa-Pro aminopeptidase E Amino acid transport and metabolism ;}	{NA}	{GO:0016787; hydrolase activity; molecular_function}	{NA}	{NA}	{NA}	{NA}	{NA}	{false}	{NA}	{PF01321:Creatinase/Prolidase N-terminal domain}
MAR44G.1_GM000546	{Scaffold1:603025:604014:+}	{WP_055670403.1; N(2)-acetyl-L-2,4-diaminobutanoate deacetylase DoeB [Roseibium alexandrii]}	{E1V7W0; N-alpha-acetyl-L-2,4-diaminobutyric acid deacetylase }	{labp:FJ695_10255; K15784 doeB N2-acetyl-L-2,4-diaminobutanoate deacetylase 3.5.1.125 Metabolism; Amino acid metabolism; Glycine, serine and threonine metabolism [PATH:ko00260]}	{WP.015495524.1; COG3608 Predicted deacylase R General function prediction only ;}	{NA}	{GO:0016788; hydrolase activity, acting on ester bonds; molecular_function GO:0008152; NA}	{NA}	{NA}	{NA}	{NA}	{NA}	{false}	{NA}	{PF04952:Succinylglutamate desuccinylase / Aspartoacylase family}
MAR44G.1_GM000547	{Scaffold1:604059:605162:-}	{WP_055670402.1; S-methyl-5-thioribose-1-phosphate isomerase [Roseibium alexandrii]}	{A6X8E9; Methylthioribose-1-phosphate isomerase }	{labp:FJ695_27750; K08963 mtnA methylthioribose-1-phosphate isomerase 5.3.1.23 Metabolism; Amino acid metabolism; Cysteine and methionine metabolism [PATH:ko00270]}	{WP.012177199.1; COG0182 5-methylthioribose/5-deoxyribulose 1-phosphate isomerase (methionine salvage pathway), a paralog of eIF-2B alpha subunit E Amino acid transport and metabolism ;}	{NA}	{GO:0044237; cellular metabolic process; biological_process}	{NA}	{NA}	{NA}	{NA}	{NA}	{false}	{NA}	{PF01008:Initiation factor 2 subunit family}
MAR44G.1_GM000548	{Scaffold1:605364:605951:+}	{OJJ13037.1; two-component system response regulator [Alphaproteobacteria bacterium AO1-B]}	{NA}	{labr:CHH27_27280; K07183 nasT two-component system, response regulator / RNA-binding antiterminator -- --}	{WP.023001117.1; COG3707 Two-component response regulator, AmiR/NasT family, consists of REC and RNA-binding antiterminator (ANTAR) domains TK Signal transduction mechanisms ; Transcription ;}	{NA}	{GO:0000156; two-component response regulator activity; molecular_function GO:0003723; RNA binding; molecular_function GO:0000160; two-component signal transduction system (phosphorelay); biological_process GO:0046872; metal ion binding; molecular_function GO:0006355; regulation of transcription, DNA-dependent; biological_process GO:0031419; cobalamin binding; molecular_function}	{NA}	{NA}	{NA}	{NA}	{NA}	{false}	{NA}	{PF02310:B12 binding domain PF03861:ANTAR domain PF00072:Response regulator receiver domain}
MAR44G.1_GM000549	{Scaffold1:606011:607120:+}	{WP_008194101.1; CmpA/NrtA family ABC transporter substrate-binding protein [Roseibium alexandrii]}	{NA}	{labr:CHH27_27285; K22067 nasS two-component system, oxyanion-binding sensor -- --}	{WP.077292666.1; COG0715 ABC-type nitrate/sulfonate/bicarbonate transport system, periplasmic component P Inorganic ion transport and metabolism ;}	{NA}	{GO:0003723; RNA binding; molecular_function GO:0016788; hydrolase activity, acting on ester bonds; molecular_function GO:0005737; cytoplasm; cellular_component GO:0016070; RNA metabolic process; biological_process}	{NA}	{NA}	{NA}	{NA}	{NA}	{false}	{NA}	{PF08845:Toxin SymE, type I toxin-antitoxin system}
MAR44G.1_GM000550	{Scaffold1:607176:607409:+}	{CTQ64898.1; hypothetical protein LAX5112_00439 [Roseibium alexandrii]}	{NA}	{NA}	{NA}	{NA}	{NA}	{NA}	{NA}	{NA}	{NA}	{NA}	{false}	{NA}	{NA}
MAR44G.1_GM000551	{Scaffold1:607514:608920:+}	{EEE46857.1; ABC-type nitrate/sulfonate/bicarbonate transport system, periplasmic component [Roseibium alexandrii DFL-11]}	{NA}	{labr:CHH27_27290; K15576 nrtA, nasF, cynA nitrate/nitrite transport system substrate-binding protein -- Metabolism; Energy metabolism; Nitrogen metabolism [PATH:ko00910] Environmental Information Processing; Membrane transport; ABC transporters [PATH:ko02010]}	{WP.023001119.1; COG0715 ABC-type nitrate/sulfonate/bicarbonate transport system, periplasmic component P Inorganic ion transport and metabolism ;}	{NA}	{NA}	{NA}	{NA}	{NA}	{NA}	{NA}	{false}	{NA}	{NA}
MAR44G.1_GM000552	{Scaffold1:609004:610086:+}	{WP_008195523.1; ABC transporter permease [Roseibium alexandrii]}	{NA}	{labr:CHH27_27295; K15577 nrtB, nasE, cynB nitrate/nitrite transport system permease protein -- Metabolism; Energy metabolism; Nitrogen metabolism [PATH:ko00910] Environmental Information Processing; Membrane transport; ABC transporters [PATH:ko02010]}	{WP.023001120.1; COG0600 ABC-type nitrate/sulfonate/bicarbonate transport system, permease component P Inorganic ion transport and metabolism ;}	{gnl|TC-DB|Q7BW13; 3.A.1.16.2 3.A.1.16.2 Integral membrane protein}	{GO:0006810; transport; biological_process GO:0005215; NA GO:0016020; membrane; cellular_component}	{PHI:10342; A0A550KY48 ntrB 287 Pseudomonas aeruginosa nosocomial infection Mus musculus (related: house mouse) "Nitrate ABC transporter, permease protein" Gene deletion: full; gene complementation unaffected pathogenicity}	{NA}	{NA}	{NA}	{NA}	{false}	{NA}	{PF00528:Binding-protein-dependent transport system inner membrane component}
MAR44G.1_GM000553	{Scaffold1:610097:611857:+}	{WP_008189133.1; nitrate ABC transporter ATP-binding protein [Roseibium alexandrii]}	{Q55108; Bicarbonate transport ATP-binding protein CmpD }	{labr:CHH27_27300; K15578 nrtC, nasD nitrate/nitrite transport system ATP-binding protein 7.3.2.4 Metabolism; Energy metabolism; Nitrogen metabolism [PATH:ko00910] Environmental Information Processing; Membrane transport; ABC transporters [PATH:ko02010]}	{WP.077292667.1; COG1116 ABC-type nitrate/sulfonate/bicarbonate transport system, ATPase component P Inorganic ion transport and metabolism ;}	{gnl|TC-DB|Q55108; 3.A.1.16.3 CYTOPLASMIC MEMBRANE PROTEIN D (CMPD PROTEIN) - Synechococcus sp. (strain PCC 7942) (Anacystis nidulans R2).}	{GO:0016301; kinase activity; molecular_function GO:0006614; SRP-dependent cotranslational protein targeting to membrane; biological_process GO:0016887; ATPase activity; molecular_function GO:0005524; ATP binding; molecular_function GO:0008152; NA GO:0000723; telomere maintenance; biological_process GO:0005525; GTP binding; molecular_function GO:0003924; GTPase activity; molecular_function GO:004…	{NA}	{NA}	{NA}	{ARO:3000535; macB 129.028 efflux pump complex or subunit conferring antibiotic resistance }	{NA}	{false}	{NA}	{PF00931:NB-ARC domain PF00485:Phosphoribulokinase / Uridine kinase family PF00004:ATPase family associated with various cellular activities (AAA) PF05970:PIF1-like helicase PF00006:ATP synthase alpha/beta family, nucleotide-binding domain PF01926:50S ribosome-binding GTPase PF00005:ABC transporter PF06414:Zeta toxin PF03193:Protein of unknown function, DUF258 PF00448:SRP54-type protein, GTPase d…
MAR44G.1_GM000554	{Scaffold1:611874:614327:+}	{WP_008192014.1; nitrite reductase large subunit NirB [Roseibium alexandrii]}	{P42435; Nitrite reductase [NAD(P)H] }	{labr:CHH27_27305; K26139 nasD, nasB nitrite reductase [NAD(P)H] large subunit 1.7.1.4 Metabolism; Energy metabolism; Nitrogen metabolism [PATH:ko00910]}	{WP.077292668.1; COG1251 NAD(P)H-nitrite reductase, large subunit C Energy production and conversion ;}	{NA}	{GO:0016491; oxidoreductase activity; molecular_function GO:0016117; carotenoid biosynthetic process; biological_process GO:0008033; tRNA processing; biological_process GO:0016705; oxidoreductase activity, acting on paired donors, with incorporation or reduction of molecular oxygen; molecular_function GO:0055114; oxidation-reduction process; biological_process GO:0050660; flavin adenine dinucleot…	{NA}	{NA}	{NA}	{NA}	{NA}	{false}	{NA}	{PF01266:FAD dependent oxidoreductase PF01134:Glucose inhibited division protein A PF00070:Pyridine nucleotide-disulphide oxidoreductase PF07992:Pyridine nucleotide-disulphide oxidoreductase PF05834:Lycopene cyclase protein PF01077:Nitrite and sulphite reductase 4Fe-4S domain PF03460:Nitrite/Sulfite reductase ferredoxin-like half domain PF01593:Flavin containing amine oxidoreductase}
MAR44G.1_GM000555	{Scaffold1:614324:614671:+}	{WP_055670396.1; nitrite reductase small subunit NirD [Roseibium alexandrii]}	{NA}	{labr:CHH27_27310; K26138 nasE nitrite reductase [NAD(P)H] small subunit 1.7.1.4 Metabolism; Energy metabolism; Nitrogen metabolism [PATH:ko00910]}	{WP.050473144.1; COG2146 Ferredoxin subunit of nitrite reductase or a ring-hydroxylating dioxygenase PQ Inorganic ion transport and metabolism ; Secondary metabolites biosynthesis, transport and catabolism ;}	{NA}	{GO:0016491; oxidoreductase activity; molecular_function GO:0055114; oxidation-reduction process; biological_process GO:0051537; 2 iron, 2 sulfur cluster binding; molecular_function}	{NA}	{NA}	{NA}	{NA}	{NA}	{false}	{NA}	{PF00355:Rieske [2Fe-2S] domain}
MAR44G.1_GM000556	{Scaffold1:614721:617411:+}	{WP_008195849.1; nitrate reductase [Roseibium alexandrii]}	{Q06457; Nitrate reductase }	{labr:CHH27_27315; K00372 nasC, nasA assimilatory nitrate reductase catalytic subunit 1.7.99.- Metabolism; Energy metabolism; Nitrogen metabolism [PATH:ko00910]}	{WP.077292670.1; COG3383 Predicted molibdopterin-dependent oxidoreductase YjgC R General function prediction only ;}	{NA}	{GO:0055114; oxidation-reduction process; biological_process GO:0016491; oxidoreductase activity; molecular_function GO:0030151; molybdenum ion binding; molecular_function}	{NA}	{NA}	{NA}	{NA}	{NA}	{false}	{NA}	{PF04879:Molybdopterin oxidoreductase Fe4S4 domain PF01568:Molydopterin dinucleotide binding domain PF00384:Molybdopterin oxidoreductase}
MAR44G.1_GM000557	{Scaffold1:617386:618876:+}	{WP_208981103.1; siroheme synthase CysG [Roseibium alexandrii]}	{A7FLY4; Siroheme synthase 1 }	{labt:FIU93_18235; K02302 cysG uroporphyrin-III C-methyltransferase / precorrin-2 dehydrogenase / sirohydrochlorin ferrochelatase [EC:2.1.1.107 1.3.1.76 4.99.1.4] 2.1.1.107,1.3.1.76,4.99.1.4 Metabolism; Metabolism of cofactors and vitamins; Porphyrin metabolism [PATH:ko00860]}	{WP.077293593.1; COG1648 Siroheme synthase (precorrin-2 oxidase/ferrochelatase domain) H Coenzyme transport and metabolism ;}	{NA}	{GO:0019354; siroheme biosynthetic process; biological_process GO:0006779; porphyrin biosynthetic process; biological_process GO:0055114; oxidation-reduction process; biological_process GO:0008152; NA GO:0043115; precorrin-2 dehydrogenase activity; molecular_function GO:0008168; methyltransferase activity; molecular_function}	{NA}	{NA}	{NA}	{NA}	{NA}	{false}	{NA}	{PF10414:Sirohaem synthase dimerisation region PF00590:Tetrapyrrole (Corrin/Porphyrin) Methylases PF13241:Putative NAD(P)-binding}
MAR44G.1_GM000558	{Scaffold1:619055:620404:+}	{WP_055670394.1; aspartate aminotransferase family protein [Roseibium alexandrii]}	{Q84P54; Gamma aminobutyrate transaminase 1, mitochondrial }	{labp:FJ695_27495; K16871 POP2 4-aminobutyrate---pyruvate transaminase 2.6.1.96 Metabolism; Carbohydrate metabolism; Butanoate metabolism [PATH:ko00650] Metabolism; Amino acid metabolism; Alanine, aspartate and glutamate metabolism [PATH:ko00250]}	{WP.077290837.1; COG0161 Adenosylmethionine-8-amino-7-oxononanoate aminotransferase H Coenzyme transport and metabolism ;}	{NA}	{GO:0030170; pyridoxal phosphate binding; molecular_function GO:0008483; transaminase activity; molecular_function}	{NA}	{NA}	{NA}	{ARO:3000024; patA 135.961 efflux pump complex or subunit conferring antibiotic resistance }	{NA}	{false}	{NA}	{PF00202:Aminotransferase class-III}
MAR44G.1_GM000559	{Scaffold1:620401:621486:+}	{WP_008193313.1; anhydro-N-acetylmuramic acid kinase [Roseibium alexandrii]}	{Q6N702; Anhydro-N-acetylmuramic acid kinase }	{labp:FJ695_27490; K09001 anmK anhydro-N-acetylmuramic acid kinase 2.7.1.170 Metabolism; Carbohydrate metabolism; Amino sugar and nucleotide sugar metabolism [PATH:ko00520]}	{WP.077290836.1; COG2377 1,6-Anhydro-N-acetylmuramate kinase M Cell wall/membrane/envelope biogenesis ;}	{NA}	{GO:0005524; ATP binding; molecular_function GO:0009254; peptidoglycan turnover; biological_process GO:0006040; amino sugar metabolic process; biological_process GO:0016773; phosphotransferase activity, alcohol group as acceptor; molecular_function}	{NA}	{NA}	{NA}	{NA}	{NA}	{false}	{NA}	{PF03702:Uncharacterised protein family (UPF0075)}
MAR44G.1_GM000560	{Scaffold1:621518:622879:+}	{OJJ13742.1; pyridine nucleotide-disulfide oxidoreductase [Alphaproteobacteria bacterium AO1-B]}	{NA}	{NA}	{NA}	{NA}	{GO:0050660; flavin adenine dinucleotide binding; molecular_function GO:0016117; carotenoid biosynthetic process; biological_process GO:0055114; oxidation-reduction process; biological_process GO:0016491; oxidoreductase activity; molecular_function GO:0016705; oxidoreductase activity, acting on paired donors, with incorporation or reduction of molecular oxygen; molecular_function GO:0008033; tRNA…	{PHI:6705; A0A0H2Z644 ibeA 562 Escherichia coli neonatal sepsis; neonatal meningitis Mus musculus (related: house mouse) Invasion protein Gene mutation reduced virulence}	{VFG033411; VF0237 Ibes ibeA invasion protein IbeA IbeA is unique to E. coli K1. The ibeB and ibeC are found to have K12 homologues p77211 and yijP respectively. IbeA and IbeB encode outer membrane proteins with three and two transmembrane domains, respectively; IbeC has a signal peptide-like sequence and five or six transmembrane segments at its N terminus Contributes to brain microvascular endo…	{NA}	{NA}	{NA}	{false}	{NA}	{PF01593:Flavin containing amine oxidoreductase PF01266:FAD dependent oxidoreductase PF01134:Glucose inhibited division protein A PF00070:Pyridine nucleotide-disulphide oxidoreductase PF07992:Pyridine nucleotide-disulphide oxidoreductase PF05834:Lycopene cyclase protein}
MAR44G.1_GM000561	{Scaffold1:622946:623065:+}	{CTQ64864.1; hypothetical protein LAX5112_00428 [Roseibium alexandrii]}	{NA}	{NA}	{NA}	{NA}	{NA}	{NA}	{NA}	{NA}	{NA}	{NA}	{false}	{NA}	{NA}
MAR44G.1_GM000562	{Scaffold1:623052:623669:+}	{WP_008195721.1; GntR family transcriptional regulator [Roseibium alexandrii]}	{NA}	{NA}	{WP.077290835.1; COG1802 DNA-binding transcriptional regulator, GntR family K Transcription ;}	{NA}	{GO:0003700; sequence-specific DNA binding transcription factor activity; molecular_function GO:0003677; DNA binding; molecular_function GO:0005622; intracellular; cellular_component GO:0016779; nucleotidyltransferase activity; molecular_function GO:0006355; regulation of transcription, DNA-dependent; biological_process}	{NA}	{NA}	{NA}	{NA}	{NA}	{false}	{NA}	{PF08220:DeoR-like helix-turn-helix domain PF00392:Bacterial regulatory proteins, gntR family PF10410:DnaB-helicase binding domain of primase PF01325:Iron dependent repressor, N-terminal DNA binding domain}
MAR44G.1_GM000563	{Scaffold1:623682:625277:-}	{WP_055670392.1; bifunctional aspartate transaminase/aspartate 4-decarboxylase [Roseibium alexandrii]}	{Q53IZ1; Bifunctional aspartate aminotransferase and L-aspartate beta-decarboxylase }	{pshq:F3W81_02265; K09758 asdA aspartate 4-decarboxylase 4.1.1.12 Metabolism; Amino acid metabolism; Alanine, aspartate and glutamate metabolism [PATH:ko00250] Metabolism; Amino acid metabolism; Cysteine and methionine metabolism [PATH:ko00270]}	{WP.129072886.1; COG0436 Aspartate/methionine/tyrosine aminotransferase E Amino acid transport and metabolism ;}	{NA}	{GO:0030170; pyridoxal phosphate binding; molecular_function GO:0009058; biosynthetic process; biological_process}	{NA}	{NA}	{NA}	{NA}	{NA}	{false}	{NA}	{PF00155:Aminotransferase class I and II}
MAR44G.1_GM000564	{Scaffold1:625296:627005:-}	{WP_055670391.1; aspartate-alanine antiporter [Roseibium alexandrii]}	{Q5NGK7; Uncharacterized transporter FTT_0829c }	{pshq:F3W81_02270; K07085 K07085 putative transport protein -- --}	{WP.129072885.1; COG2985 Uncharacterized membrane protein YbjL, putative transporter R General function prediction only ;}	{gnl|TC-DB|Q845W9; 2.A.81.1.6 Aspartate:alanine antiporter OS=Pseudomonas dacunhae ATCC 21192 GN=aspT PE=3 SV=1}	{GO:0006813; potassium ion transport; biological_process GO:0008324; cation transmembrane transporter activity; molecular_function}	{NA}	{NA}	{NA}	{NA}	{NA}	{false}	{NA}	{PF02080:TrkA-C domain}
MAR44G.1_GM000565	{Scaffold1:627111:628505:-}	{WP_055670390.1; L-serine ammonia-lyase [Roseibium alexandrii]}	{O86564; L-serine dehydratase }	{labp:FJ695_27460; K01752 E4.3.1.17, sdaA, sdaB, tdcG L-serine dehydratase 4.3.1.17 Metabolism; Amino acid metabolism; Glycine, serine and threonine metabolism [PATH:ko00260] Metabolism; Amino acid metabolism; Cysteine and methionine metabolism [PATH:ko00270]}	{WP.075284318.1; COG1760 L-serine deaminase E Amino acid transport and metabolism ;}	{NA}	{GO:0003941; L-serine ammonia-lyase activity; molecular_function GO:0047547; 2-methylcitrate dehydratase activity; molecular_function GO:0019543; propionate catabolic process; biological_process GO:0006094; gluconeogenesis; biological_process GO:0051539; 4 iron, 4 sulfur cluster binding; molecular_function}	{NA}	{NA}	{NA}	{NA}	{NA}	{false}	{NA}	{PF03972:MmgE/PrpD family PF03315:Serine dehydratase beta chain}
MAR44G.1_GM000566	{Scaffold1:628742:629962:+}	{WP_055670389.1; kynureninase [Roseibium alexandrii]}	{P83788; Kynureninase }	{labp:FJ695_27455; K01556 KYNU, kynU kynureninase 3.7.1.3 Metabolism; Amino acid metabolism; Tryptophan metabolism [PATH:ko00380]}	{WP.077290833.1; COG3844 Kynureninase E Amino acid transport and metabolism ;}	{NA}	{GO:0030170; pyridoxal phosphate binding; molecular_function GO:0008152; NA}	{NA}	{NA}	{NA}	{NA}	{NA}	{false}	{NA}	{PF01053:Cys/Met metabolism PLP-dependent enzyme PF00266:Aminotransferase class-V}
MAR44G.1_GM000567	{Scaffold1:629955:632048:-}	{WP_134853034.1; EAL domain-containing protein [Roseibium alexandrii]}	{NA}	{NA}	{WP.077290832.1; COG5001 Cyclic di-GMP metabolism protein, combines GGDEF and EAL domains with a 6TM membrane domain T Signal transduction mechanisms ;}	{NA}	{GO:0016020; membrane; cellular_component GO:0004871; signal transducer activity; molecular_function GO:0006355; regulation of transcription, DNA-dependent; biological_process GO:0007165; signal transduction; biological_process}	{NA}	{NA}	{NA}	{NA}	{NA}	{false}	{NA}	{PF13426:PAS domain PF00989:PAS fold PF00629:MAM domain, meprin/A5/mu PF13188:PAS domain}
MAR44G.1_GM000568	{Scaffold1:632275:632454:+}	{NA}	{NA}	{NA}	{NA}	{NA}	{NA}	{NA}	{NA}	{NA}	{NA}	{NA}	{false}	{NA}	{NA}
MAR44G.1_GM000569	{Scaffold1:632645:632773:+}	{NA}	{NA}	{NA}	{NA}	{NA}	{NA}	{NA}	{NA}	{NA}	{NA}	{NA}	{false}	{NA}	{NA}
MAR44G.1_GM000570	{Scaffold1:632773:633543:+}	{WP_040451471.1; ABC transporter ATP-binding protein [Roseibium alexandrii]}	{O28881; Probable branched-chain amino acid transport ATP-binding protein LivG }	{labt:FIU93_01820; K01995 livG branched-chain amino acid transport system ATP-binding protein -- Environmental Information Processing; Membrane transport; ABC transporters [PATH:ko02010] Cellular Processes; Cellular community - prokaryotes; Quorum sensing [PATH:ko02024]}	{WP.077290830.1; COG0411 ABC-type branched-chain amino acid transport system, ATPase component LivG E Amino acid transport and metabolism ;}	{gnl|TC-DB|Q7A2H0; 3.A.1.4.6 ATP-binding protein of ABC transporter - Anabaena sp. (strain PCC 7120)}	{GO:0007059; chromosome segregation; biological_process GO:0003924; GTPase activity; molecular_function GO:0005524; ATP binding; molecular_function GO:0005525; GTP binding; molecular_function GO:0030261; chromosome condensation; biological_process GO:0016301; kinase activity; molecular_function GO:0009295; nucleoid; cellular_component GO:0003677; DNA binding; molecular_function GO:0016887; ATPase…	{NA}	{NA}	{NA}	{NA}	{NA}	{false}	{NA}	{PF01926:50S ribosome-binding GTPase PF00005:ABC transporter PF04310:MukB N-terminal PF06414:Zeta toxin PF03193:Protein of unknown function, DUF258 PF00004:ATPase family associated with various cellular activities (AAA)}
MAR44G.1_GM000571	{Scaffold1:633540:634247:+}	{WP_055670388.1; ABC transporter ATP-binding protein [Roseibium alexandrii]}	{P0A192; High-affinity branched-chain amino acid transport ATP-binding protein LivF }	{labp:FJ695_27440; K01996 livF branched-chain amino acid transport system ATP-binding protein -- Environmental Information Processing; Membrane transport; ABC transporters [PATH:ko02010] Cellular Processes; Cellular community - prokaryotes; Quorum sensing [PATH:ko02024]}	{WP.077290829.1; COG0410 ABC-type branched-chain amino acid transport system, ATPase component LivF E Amino acid transport and metabolism ;}	{gnl|TC-DB|P73650; 3.A.1.4.2 HIGH-AFFINITY BRANCHED-CHAIN AMINO ACID TRANSPORT ATP-BINDING PROTEIN BRAG - Synechocystis sp. (strain PCC 6803).}	{GO:0003924; GTPase activity; molecular_function GO:0016887; ATPase activity; molecular_function GO:0005525; GTP binding; molecular_function GO:0005524; ATP binding; molecular_function}	{NA}	{NA}	{NA}	{NA}	{NA}	{false}	{NA}	{PF03193:Protein of unknown function, DUF258 PF00004:ATPase family associated with various cellular activities (AAA) PF00005:ABC transporter}
MAR44G.1_GM000572	{Scaffold1:634253:635125:+}	{WP_055670387.1; branched-chain amino acid ABC transporter permease [Roseibium alexandrii]}	{NA}	{labp:FJ695_27435; K01997 livH branched-chain amino acid transport system permease protein -- Environmental Information Processing; Membrane transport; ABC transporters [PATH:ko02010] Cellular Processes; Cellular community - prokaryotes; Quorum sensing [PATH:ko02024]}	{WP.023002230.1; COG0559 Branched-chain amino acid ABC-type transport system, permease component E Amino acid transport and metabolism ;}	{NA}	{GO:0005215; NA GO:0016020; membrane; cellular_component GO:0006810; transport; biological_process}	{NA}	{NA}	{NA}	{NA}	{NA}	{false}	{NA}	{PF02653:Branched-chain amino acid transport system / permease component}
MAR44G.1_GM000573	{Scaffold1:635140:636102:+}	{WP_008194068.1; branched-chain amino acid ABC transporter permease [Roseibium alexandrii]}	{NA}	{labp:FJ695_27430; K01998 livM branched-chain amino acid transport system permease protein -- Environmental Information Processing; Membrane transport; ABC transporters [PATH:ko02010] Cellular Processes; Cellular community - prokaryotes; Quorum sensing [PATH:ko02024]}	{WP.023002229.1; COG4177 ABC-type branched-chain amino acid transport system, permease component E Amino acid transport and metabolism ;}	{NA}	{GO:0006810; transport; biological_process GO:0016020; membrane; cellular_component GO:0005215; NA}	{NA}	{NA}	{NA}	{NA}	{NA}	{false}	{NA}	{PF02653:Branched-chain amino acid transport system / permease component}
MAR44G.1_GM000574	{Scaffold1:636194:637399:+}	{WP_008192731.1; ABC transporter substrate-binding protein [Roseibium alexandrii]}	{NA}	{labp:FJ695_27425; K01999 livK branched-chain amino acid transport system substrate-binding protein -- Environmental Information Processing; Membrane transport; ABC transporters [PATH:ko02010] Cellular Processes; Cellular community - prokaryotes; Quorum sensing [PATH:ko02024]}	{WP.055657548.1; COG0683 ABC-type branched-chain amino acid transport system, periplasmic component E Amino acid transport and metabolism ;}	{NA}	{NA}	{NA}	{NA}	{NA}	{NA}	{YES}	{false}	{NA}	{NA}
MAR44G.1_GM000575	{Scaffold1:637470:638027:-}	{WP_082428870.1; non-canonical purine NTP pyrophosphatase [Roseibium alexandrii]}	{A5E8I8; dITP/XTP pyrophosphatase }	{bmed:GYM46_08025; K01519 rdgB, ITPA XTP/dITP diphosphohydrolase 3.6.1.66 Metabolism; Nucleotide metabolism; Purine metabolism [PATH:ko00230] Metabolism; Xenobiotics biodegradation and metabolism; Drug metabolism - other enzymes [PATH:ko00983]}	{WP.099510726.1; COG0127 Inosine/xanthosine triphosphate pyrophosphatase, all-alpha NTP-PPase family F Nucleotide transport and metabolism ;}	{NA}	{GO:0016787; hydrolase activity; molecular_function}	{NA}	{NA}	{NA}	{NA}	{NA}	{false}	{NA}	{PF01725:Ham1 family}
MAR44G.1_GM000576	{Scaffold1:638288:639466:+}	{WP_055670385.1; NAD(P)/FAD-dependent oxidoreductase [Roseibium alexandrii]}	{P37631; Uncharacterized protein YhiN }	{NA}	{WP.077290828.1; COG2081 Predicted flavoprotein YhiN R General function prediction only ;}	{NA}	{GO:0050660; flavin adenine dinucleotide binding; molecular_function GO:0008033; tRNA processing; biological_process GO:0016705; oxidoreductase activity, acting on paired donors, with incorporation or reduction of molecular oxygen; molecular_function GO:0016491; oxidoreductase activity; molecular_function GO:0016117; carotenoid biosynthetic process; biological_process GO:0055114; oxidation-reduct…	{NA}	{NA}	{NA}	{NA}	{NA}	{false}	{NA}	{PF05834:Lycopene cyclase protein PF07992:Pyridine nucleotide-disulphide oxidoreductase PF00070:Pyridine nucleotide-disulphide oxidoreductase PF01134:Glucose inhibited division protein A PF01266:FAD dependent oxidoreductase}
MAR44G.1_GM000577	{Scaffold1:639564:640601:+}	{WP_040451475.1; LacI family DNA-binding transcriptional regulator [Roseibium alexandrii]}	{NA}	{labp:FJ695_27415; K02529 lacI, galR LacI family transcriptional regulator -- --}	{WP.077290827.1; COG1879 ABC-type sugar transport system, periplasmic component, contains N-terminal xre family HTH domain G Carbohydrate transport and metabolism ;}	{NA}	{GO:0003700; sequence-specific DNA binding transcription factor activity; molecular_function GO:0006355; regulation of transcription, DNA-dependent; biological_process}	{NA}	{NA}	{NA}	{NA}	{NA}	{false}	{NA}	{PF00356:Bacterial regulatory proteins, lacI family}
MAR44G.1_GM000578	{Scaffold1:640738:641202:+}	{WP_082428869.1; iron-responsive transcriptional regulator RirA [Roseibium alexandrii]}	{Q9R9M8; Protein aau3 }	{lagg:B0E33_07405; K13772 rirA Rrf2 family transcriptional regulator, iron-responsive regulator -- --}	{WP.075283567.1; COG1959 DNA-binding transcriptional regulator, IscR family K Transcription ;}	{NA}	{GO:0005622; intracellular; cellular_component GO:0003700; sequence-specific DNA binding transcription factor activity; molecular_function GO:0006355; regulation of transcription, DNA-dependent; biological_process}	{NA}	{NA}	{NA}	{NA}	{NA}	{false}	{NA}	{PF13463:Winged helix DNA-binding domain}
MAR44G.1_GM000579	{Scaffold1:641559:641771:+}	{EEE46150.2; Hemin uptake protein [Roseibium alexandrii DFL-11]}	{NA}	{NA}	{WP.062491931.1; COG4256 Hemin uptake protein HemP H Coenzyme transport and metabolism ;}	{NA}	{NA}	{NA}	{NA}	{NA}	{NA}	{NA}	{false}	{NA}	{NA}
MAR44G.1_GM000580	{Scaffold1:641774:643081:-}	{WP_055670383.1; adenylate/guanylate cyclase domain-containing protein [Roseibium alexandrii]}	{NA}	{labp:FJ695_27400; K01768 E4.6.1.1 adenylate cyclase 4.6.1.1 Metabolism; Nucleotide metabolism; Purine metabolism [PATH:ko00230] Cellular Processes; Cell growth and death; Meiosis - yeast [PATH:ko04113] Cellular Processes; Cellular community - prokaryotes; Biofilm formation - Pseudomonas aeruginosa [PATH:ko02025] Organismal Systems; Aging; Longevity regulating pathway - multiple species [PATH:ko0…	{WP.077290821.1; COG2114 Adenylate cyclase, class 3 T Signal transduction mechanisms ;}	{NA}	{GO:0035556; intracellular signal transduction; biological_process GO:0009190; cyclic nucleotide biosynthetic process; biological_process GO:0016849; phosphorus-oxygen lyase activity; molecular_function}	{NA}	{NA}	{NA}	{NA}	{NA}	{false}	{NA}	{PF00211:Adenylate and Guanylate cyclase catalytic domain}
MAR44G.1_GM000581	{Scaffold1:643234:644697:-}	{WP_008193540.1; betaine-aldehyde dehydrogenase [Roseibium alexandrii]}	{A6X2G8; Betaine aldehyde dehydrogenase }	{labp:FJ695_27395; K00130 betB, gbsA betaine-aldehyde dehydrogenase 1.2.1.8 Metabolism; Amino acid metabolism; Glycine, serine and threonine metabolism [PATH:ko00260]}	{WP.077290822.1; COG1012 Acyl-CoA reductase or other NAD-dependent aldehyde dehydrogenase I Lipid transport and metabolism ;}	{NA}	{GO:0055114; oxidation-reduction process; biological_process GO:0016491; oxidoreductase activity; molecular_function GO:0008152; NA}	{PHI:7520; A0A076ZMY5 VK055_1952 573 Klebsiella pneumoniae pneumonia Mus musculus (related: house mouse) Betaine aldehyde dehydrogenase Gene deletion: full unaffected pathogenicity}	{NA}	{NA}	{NA}	{NA}	{false}	{NA}	{PF00171:Aldehyde dehydrogenase family}
MAR44G.1_GM000582	{Scaffold1:644750:646408:-}	{WP_055670381.1; choline dehydrogenase [Roseibium alexandrii]}	{A5VPA6; Oxygen-dependent choline dehydrogenase }	{labp:FJ695_27390; K00108 betA, CHDH choline dehydrogenase 1.1.99.1 Metabolism; Amino acid metabolism; Glycine, serine and threonine metabolism [PATH:ko00260]}	{WP.077290823.1; COG2303 Choline dehydrogenase or related flavoprotein IR Lipid transport and metabolism ; General function prediction only ;}	{NA}	{GO:0016705; oxidoreductase activity, acting on paired donors, with incorporation or reduction of molecular oxygen; molecular_function GO:0016491; oxidoreductase activity; molecular_function GO:0016117; carotenoid biosynthetic process; biological_process GO:0055114; oxidation-reduction process; biological_process GO:0050660; flavin adenine dinucleotide binding; molecular_function GO:0016614; oxid…	{PHI:9126; Q2YIV2 bab2_0277 235 Brucella abortus brucellosis Mus musculus (related: house mouse) choline dehydrogenase Gene disruption; gene complementation reduced virulence}	{NA}	{NA}	{NA}	{NA}	{false}	{WAR11618.1_; AA3 cellobiose dehydrogenase (EC 1.1.99.18); glucose 1-oxidase (EC 1.1.3.4); aryl alcohol oxidase (EC 1.1.3.7); alcohol oxidase (EC 1.1.3.13); pyranose oxidase (EC 1.1.3.10); glucose 1-dehydrogenase (FAD, quinone) (EC 1.1.5.9); pyranose dehydrogenase (EC 1.1.99.29); oligosaccharide dehydrogenase (FAD) (EC 1.1.5.-) }	{PF05199:GMC oxidoreductase PF07992:Pyridine nucleotide-disulphide oxidoreductase PF05834:Lycopene cyclase protein PF00732:GMC oxidoreductase PF02254:TrkA-N domain PF01266:FAD dependent oxidoreductase}
MAR44G.1_GM000583	{Scaffold1:646428:647030:-}	{WP_055670380.1; transcriptional regulator BetI [Roseibium alexandrii]}	{Q985M2; HTH-type transcriptional regulator BetI }	{labp:FJ695_27385; K02167 betI TetR/AcrR family transcriptional regulator, transcriptional repressor of bet genes -- --}	{WP.023002215.1; COG1309 DNA-binding protein, AcrR family, includes nucleoid occlusion protein SlmA K Transcription ;}	{NA}	{GO:0003677; DNA binding; molecular_function}	{PHI:10583; C6DKY6 betL 554 Pectobacterium carotovorum soft rot Zantedeschia aethiopica (related: arum-lily) HTH-type transcriptional regulator Gene deletion: full; gene complementation unaffected pathogenicity}	{NA}	{NA}	{NA}	{NA}	{false}	{NA}	{PF00440:Bacterial regulatory proteins, tetR family}
MAR44G.1_GM000584	{Scaffold1:647160:648173:+}	{WP_008194515.1; choline ABC transporter substrate-binding protein [Roseibium alexandrii]}	{Q9L4K3; Uncharacterized protein ORF1 (Fragment) }	{labp:FJ695_27380; K02002 proX glycine betaine/proline transport system substrate-binding protein -- Environmental Information Processing; Membrane transport; ABC transporters [PATH:ko02010]}	{WP.023002216.1; COG2113 ABC-type proline/glycine betaine transport system, periplasmic component E Amino acid transport and metabolism ;}	{gnl|TC-DB|Q8RPR1; 3.A.1.12.7 ProX - Rhizobium meliloti (Sinorhizobium meliloti).}	{GO:0005215; NA GO:0006810; transport; biological_process}	{NA}	{NA}	{NA}	{NA}	{YES}	{false}	{NA}	{PF04069:Substrate binding domain of ABC-type glycine betaine transport system}
MAR44G.1_GM000585	{Scaffold1:648301:649092:+}	{WP_040451484.1; choline ABC transporter permease subunit [Roseibium alexandrii]}	{P46921; Glycine betaine transport system permease protein OpuAB }	{labp:FJ695_27375; K02001 proW glycine betaine/proline transport system permease protein -- Environmental Information Processing; Membrane transport; ABC transporters [PATH:ko02010]}	{WP.055657561.1; COG4176 ABC-type proline/glycine betaine transport system, permease component E Amino acid transport and metabolism ;}	{gnl|TC-DB|Q92N36; 3.A.1.12.7 PUTATIVE GLYCINE BETAINE TRANSPORT SYSTEM PERMEASE ABC TRANSPORTER PROTEIN (ProW) - Rhizobium meliloti (Sinorhizobium meliloti).}	{GO:0006810; transport; biological_process GO:0005747; mitochondrial respiratory chain complex I; cellular_component GO:0005215; NA GO:0005739; mitochondrion; cellular_component GO:0022900; electron transport chain; biological_process GO:0016020; membrane; cellular_component}	{NA}	{NA}	{NA}	{NA}	{NA}	{false}	{NA}	{PF00528:Binding-protein-dependent transport system inner membrane component PF08122:NADH-ubiquinone oxidoreductase B12 subunit family}
[truncated: 4,434 more rows]

## Sheet: PHA
locus tag	Gene name	Gene_id	Locus	{nr}	{SwissProt}	{KEGG}	{COG}	{TCDB}	{GO}	{PHI}	{VFDB}	{ARDB}	{CARD}	{Secretory_Protein}	{T3SS}	{CAZy}	{Pfam}
[truncated: 10 more rows]

## Sheet: PRC
Locus tag	Gene name	Gene_id	Locus	{nr}	{SwissProt}	{KEGG}	{COG}	{TCDB}	{GO}	{PHI}	{VFDB}	{ARDB}	{CARD}	{Secretory_Protein}	{T3SS}	{CAZy}	{Pfam}
[truncated: 27 more rows]
